# Supplementary material for: Transcriptome Comparison of Human Neurons Generated Using Induced Pluripotent Stem Cells Derived from Dental Pulp and Skin Fibroblasts
Source: PLoS One. 2013 Oct 3;8(10):e75682. doi: 10.1371/journal.pone.0075682 (PMC3789755; doi:10.1371/journal.pone.0075682)
Supplement: Table S2 — Differentially expressed genes during transition from iPSCs to NPCs. Genes that significantly changed in expression during transition from iPSCs to NPCs for TIPS4 and TIPS4-C5 in descending order of significance. (XLSX) [file pone.0075682.s004.xlsx]

## Sheet: Sheet1
ENSG_ID	gene_symbol	coordinates	FPKM TIPS4 iPSCs	FPKM TIPS4_NPCs	FPKM TIPS4-C5 iPSCs	FPKM TIPS4-C5_NPCs	log2_fold change (E/D)	log2_fold change (G/F)	mean_FPKM_iPSCs	mean_FPKM_NPCs	log2_fold change (NPC/iPSC)	p-value_NPCs/iPSCs	FDR NPCs/iPSCs
ENSG00000265992.1	ESRG	chr3:54156573-55108584	439.882	0.076488	374.926	0.0260956	-12.3124	-13.3425	407.404	0.0512918	-12.8213	2.71367937922532e-56	9.75839104769424e-53
ENSG00000241186.3	TDGF1	chr3:46556912-46668033	541.718	0.30679	422.696	0.0322825	-10.7398	-13.2873	482.207	0.169536	-11.4319	4.3975876267039e-50	1.26509800845018e-46
ENSG00000130182.3	ZSCAN10	chr16:3138890-3149318	79.6745	0.00924007	61.8171	11.3022	-12.016	-2.45036	70.7458	5.65572	-3.64369	3.33247215526995e-43	7.98904658023382e-40
ENSG00000104413.11	ESRP1	chr8:95653301-95719694	81.0991	0.0582326	65.4578	0.0417035	-10.2152	-10.3063	73.2785	0.049968	-10.3807	5.26147662787826e-40	1.08115828307716e-36
ENSG00000133980.4	VRTN	chr14:74769771-74826711	41.5953	0.00961131	29.6241	0.00812916	-11.0509	-10.6747	35.6097	0.00887024	-11.3263	1.65444501028202e-39	2.97469212848707e-36
ENSG00000260834.1	RP11-256I9.2	chr16:65224875-65610203	2100.54	0	126.91	0	-17.6804	-13.6316	1113.72	0	-17.765	9.30619349876522e-39	1.48733652540266e-35
ENSG00000179059.5	ZFP42	chr4:188916924-188926204	87.6511	0.0706421	56.8975	0	-10.0862	-12.4744	72.2743	0.035321	-10.8078	1.31969922196523e-38	1.89825536087479e-35
ENSG00000254277.1	RP11-1144P22.1	chr8:72587534-72615021	192.171	0.047892	126.903	0	-11.6968	-13.6316	159.537	0.023946	-12.4283	1.50787321031481e-38	1.97174984156075e-35
ENSG00000254934.1	LINC00678	chr11:27528384-27899195	184.493	0.046766	111.907	0.0388808	-11.6663	-11.1609	148.2	0.0428234	-11.5976	3.09161123842247e-37	3.70581133778907e-34
ENSG00000111319.8	SCNN1A	chr12:6456008-6500733	57.0299	0.0932661	48.0728	0.140269	-9.10946	-8.32183	52.5513	0.116768	-8.75359	2.72349358269606e-36	3.01344089950001e-33
ENSG00000204531.10	POU5F1	chr6:31126318-31148508	196.791	0.265187	160.831	0.210242	-9.48211	-9.51232	178.811	0.237714	-9.525	2.14790716455239e-35	2.20682118963725e-32
ENSG00000146904.4	EPHA1	chr7:143078172-143220542	42.6969	0.151348	44.0295	0.180615	-8.04815	-7.85199	43.3632	0.165982	-7.98665	8.86028529920487e-35	8.49642291625086e-32
ENSG00000039068.13	CDH1	chr16:68771127-68869445	111.25	0.0944909	121.493	0.0827056	-10.0563	-10.356	116.371	0.0885983	-10.28	8.12041122314097e-34	7.30024968960373e-31
ENSG00000181885.13	CLDN7	chr17:7143332-7167302	76.96	0.0684692	69.2777	0.0301729	-9.93795	-10.7522	73.1188	0.049321	-10.3946	1.9067333254109e-32	1.61332071486532e-29
ENSG00000136110.8	LECT1	chr13:53277398-53313947	104.952	0.0848119	105.282	0.36802	-10.1125	-8.12172	105.117	0.226416	-8.82736	2.80790308934163e-32	2.24382655761611e-29
ENSG00000160973.7	FOXH1	chr8:145691425-145701718	81.9371	0.0251896	34.753	0	-11.1853	-11.7633	58.3451	0.0125948	-11.6954	1.90635809249877e-31	1.44321341065801e-28
ENSG00000147596.3	PRDM14	chr8:70963885-70983928	22.1085	0	19.1115	0	-11.111	-10.901	20.61	0	-12.0095	3.22049146782166e-31	2.31617746365734e-28
ENSG00000184697.5	CLDN6	chr16:3056166-3072384	503.938	4.34563	440.658	0.9475	-6.85425	-8.8462	472.298	2.64656	-7.47672	4.85558775834794e-31	3.32584639600366e-28
ENSG00000167600.9	CYP2S1	chr19:41698953-41713444	101.634	0.85649	110.295	0.243135	-6.87413	-8.76738	105.965	0.549813	-7.57743	9.07470064720027e-31	5.93320427769676e-28
ENSG00000119888.6	EPCAM	chr2:47572296-47614740	147.294	0.623694	91.6035	0.523858	-7.86079	-7.42296	119.449	0.573776	-7.68923	2.65235536661926e-29	1.65875998232398e-26
ENSG00000166145.9	SPINT1	chr15:41128005-41150405	44.7402	0.458934	40.5469	0.125322	-6.57637	-8.22741	42.6436	0.292128	-7.16527	8.45159526043447e-29	5.06532275942039e-26
ENSG00000052344.11	PRSS8	chr16:31142753-31147083	32.8003	0.137166	25.4378	0.0330971	-7.80056	-9.20573	29.1191	0.0851316	-8.33596	2.18688000140343e-28	1.25824327760748e-25
ENSG00000182866.12	LCK	chr1:32716839-32751766	28.6772	0	18.2122	0.0263087	-11.4862	-8.97117	23.4447	0.0131544	-10.335	4.81147013289948e-27	2.66185332275485e-24
ENSG00000161249.14	DMKN	chr19:35988121-36004560	319.223	2.47704	230.985	1.59962	-7.00404	-7.165	275.104	2.03833	-7.07294	9.77547578863302e-27	5.20779421272953e-24
ENSG00000128573.17	FOXP2	chr7:113726381-114333827	0.00822916	8.57768	0.134468	9.8364	8.87988	6.09078	0.0713486	9.20704	6.91478	4.14534302908888e-26	2.12952193322908e-23
ENSG00000212993.3	POU5F1B	chr8:128302061-128494384	52.8011	0.300345	47.5727	0.0537647	-7.41082	-9.54347	50.1869	0.177055	-8.10694	1.20393017528546e-24	5.97149366941588e-22
ENSG00000129354.7	AP1M2	chr19:10683346-10697991	45.3648	0.168164	25.3143	0	-7.99254	-11.3063	35.3396	0.084082	-8.63214	1.2669539706554e-24	6.07462197130242e-22
ENSG00000232301.1	RP11-132A1.3	chr7:100942893-100944551	42.8875	0	39.3629	0	-12.0667	-11.943	41.1252	0	-13.006	1.42083335624993e-24	6.59266677299967e-22
ENSG00000131203.8	IDO1	chr8:39759793-39873910	62.1026	0.745956	60.3033	0	-6.36044	-12.5583	61.203	0.372978	-7.33927	1.84498905647378e-24	8.29322580884966e-22
ENSG00000188112.4	C6orf132	chr6:42068855-42110357	18.4367	0.0727345	13.9496	0.0531379	-7.80066	-7.78854	16.1931	0.0629362	-7.89743	2.94526828789798e-24	1.28377997130681e-21
ENSG00000230798.1	RP4-792G4.2	chr1:63786554-63790797	83.002	0.0967187	55.803	0	-9.60336	-12.4464	69.4025	0.0483594	-10.3451	1.84228169656638e-23	7.79393527159141e-21
ENSG00000163814.3	CDCP1	chr3:45123769-45187914	6.64844	0.0266476	7.25937	0.0191182	-7.50532	-7.96377	6.9539	0.0228829	-7.96334	3.25247255779096e-23	1.33667329346472e-20
ENSG00000165905.12	GYLTL1B	chr11:45943171-45950647	73.4579	1.0935	42.1098	0.639542	-6.05695	-6.01893	57.7839	0.866521	-6.05111	1.18594274398966e-22	4.73850011931869e-20
ENSG00000198914.2	POU3F3	chr2:105469742-105542510	0.0276848	15.5465	0.0177837	28.3973	8.68932	9.9978	0.0227342	21.9719	9.6301	5.24256913494084e-22	2.03808417397268e-19
ENSG00000141934.4	PPAP2C	chr19:281042-291393	50.1751	0.367454	45.6682	0.443367	-7.05481	-6.65468	47.9216	0.405411	-6.86762	5.96139133806162e-22	2.25654350017574e-19
ENSG00000106078.13	COBL	chr7:50934443-51384515	7.09815	0.0678197	7.11455	0.042876	-6.51319	-7.07404	7.10635	0.0553478	-6.88068	9.58402292314197e-22	3.53478424939677e-19
ENSG00000124839.8	RAB17	chr2:238482964-238510257	19.2358	0.0545999	14.473	0.0292348	-8.2188	-8.52801	16.8544	0.0419173	-8.48922	1.29728261871491e-21	4.66502829689883e-19
ENSG00000124493.8	GRM4	chr6:33989627-34123399	8.9673	0.0629062	8.62557	0.0460546	-6.9441	-7.26731	8.79643	0.0544804	-7.20918	1.75233917694002e-21	6.14771871246469e-19
ENSG00000120949.10	TNFRSF8	chr1:12123433-12204264	4.50947	0.010457	4.76506	0.00700389	-7.78741	-8.13351	4.63727	0.00873044	-8.40131	3.46194875137534e-21	1.18563501999483e-18
ENSG00000205517.8	RGL3	chr19:11488235-11530018	17.0584	0.150852	17.162	0.0316679	-6.72945	-8.68691	17.1102	0.09126	-7.47413	5.56619361887888e-21	1.8619564886966e-18
ENSG00000159166.9	LAD1	chr1:201328135-201368736	7.86047	0.0670928	5.78352	0.0155096	-6.67371	-7.82725	6.822	0.0413012	-7.20406	1.21305047901049e-20	3.96557229320157e-18
ENSG00000158769.11	F11R	chr1:160965000-161008784	68.2495	1.44071	65.9006	1.51251	-5.5562	-5.43599	67.0751	1.47661	-5.50065	4.19985206786341e-20	1.34245938098105e-17
ENSG00000166105.11	GLB1L3	chr11:134144138-134189458	15.4786	0.0571743	15.0668	0.172973	-7.84908	-6.36455	15.2727	0.115074	-6.99136	4.8504228712233e-20	1.51670614303643e-17
ENSG00000179981.9	TSHZ1	chr18:72922709-73001905	0.0269158	4.86823	0.0684529	3.28825	7.04598	5.39373	0.0476844	4.07824	6.2762	5.42504367501766e-20	1.66029421747774e-17
ENSG00000240563.1	L1TD1	chr1:62660502-62678000	227.548	5.16926	185.671	6.64208	-5.45734	-4.80288	206.609	5.90567	-5.12748	2.23714803890083e-19	6.70398695657283e-17
ENSG00000083307.6	GRHL2	chr8:102473404-102681954	8.12312	0.193877	6.19544	0.0292042	-5.31804	-7.30638	7.15928	0.111541	-5.94192	7.53173376351927e-19	2.2109481317237e-16
ENSG00000149418.5	ST14	chr11:130029456-130080356	9.01739	0.0347336	7.77567	0.0298817	-7.65681	-7.60895	8.39653	0.0323077	-7.81504	9.67618681449535e-19	2.78364542279402e-16
ENSG00000140832.5	MARVELD3	chr16:71657610-71758604	16.6618	0.132548	15.2304	0.207691	-6.86982	-6.12948	15.9461	0.170119	-6.50917	1.45605581308167e-18	4.10664839516994e-16
ENSG00000140836.9	ZFHX3	chr16:72699068-73093597	0.387662	13.3221	0.511361	16.7935	5.06722	5.01034	0.449511	15.0578	5.05053	1.79204188610556e-18	4.9570635557197e-16
ENSG00000198286.5	CARD11	chr7:2945774-3083579	6.47984	0.0731416	5.76629	0.0328051	-6.28647	-7.07622	6.12307	0.0529734	-6.7239	1.94658047637608e-18	5.28294595701766e-16
ENSG00000103067.7	ESRP2	chr16:68021296-68272005	12.4594	0.320857	10.6437	1.12174	-5.23604	-3.23474	11.5516	0.721298	-3.992	2.66282015230215e-18	7.0929639019841e-16
ENSG00000101194.13	SLC17A9	chr20:61584051-61599949	9.74057	0.0978466	8.67964	0.0882505	-6.49844	-6.46669	9.2101	0.0930486	-6.55436	3.31976694760814e-18	8.68209595898099e-16
ENSG00000130203.5	APOE	chr19:45409010-45412650	464.095	24.5023	472.885	8.78836	-4.24287	-5.74814	468.49	16.6453	-4.81441	3.6665518563081e-18	9.41780033948852e-16
ENSG00000198597.3	ZNF536	chr19:30710572-31201777	0.633106	13.0202	0.00892552	10.3167	4.34066	9.09183	0.321016	11.6684	5.16215	3.84226115884112e-18	9.69597973838081e-16
ENSG00000088305.13	DNMT3B	chr20:31350190-31397162	234.166	5.05595	205.989	13.1761	-5.53062	-3.96555	220.077	9.11603	-4.5927	8.76656499661904e-18	2.17410811916152e-15
ENSG00000077009.9	NMRK2	chr19:3933100-3942414	23.7007	0.23931	20.3505	0.181856	-6.57145	-6.72961	22.0256	0.210583	-6.67512	1.0239603722664e-17	2.4963806770644e-15
ENSG00000163251.3	FZD5	chr2:208627309-208634287	35.5667	0.570162	18.8725	0.239686	-5.93833	-6.2408	27.2196	0.404924	-6.05341	1.26037300372067e-17	3.02153421425302e-15
ENSG00000130768.9	SMPDL3B	chr1:28261503-28294607	42.8719	1.68098	39.9131	0.45627	-4.66444	-6.41991	41.3925	1.06862	-5.26898	1.63805639332701e-17	3.86259068223209e-15
ENSG00000069482.6	GAL	chr11:68451246-68458643	36.0178	0.1869	40.1911	0.377779	-7.5155	-6.69586	38.1044	0.282339	-7.05125	2.06370191520978e-17	4.78778844328668e-15
ENSG00000141096.4	DPEP3	chr16:68009565-68014732	9.14573	0	8.92113	0	-9.83853	-9.8027	9.03343	0	-10.8199	2.46329994423746e-17	5.62414387268439e-15
ENSG00000017483.10	SLC38A5	chrX:48316919-48328644	34.2719	0.537205	28.6771	0.56289	-5.96922	-5.646	31.4745	0.550048	-5.82566	2.91860654697882e-17	6.5595682143349e-15
ENSG00000250091.2	DNAH10OS	chr12:124247041-124800570	0.0265774	3.49807	0.012665	2.0903	6.58358	6.53399	0.0196212	2.79418	6.82896	3.22777023770552e-17	7.14280724602404e-15
ENSG00000113739.6	STC2	chr5:172741715-172756506	17.464	0.638263	20.4231	0.447871	-4.75249	-5.47982	18.9436	0.543067	-5.11159	4.97109380629171e-17	1.08339717135909e-14
ENSG00000226792.2	LINC00371	chr13:51656983-51746524	18.4415	0.0382558	21.1261	0	-8.57882	-11.0455	19.7838	0.0191279	-9.67977	5.16926488387686e-17	1.10977173268186e-14
ENSG00000165929.8	TC2N	chr14:92047039-92333880	17.8309	0.479506	14.9126	0.0588031	-5.18772	-7.76081	16.3717	0.269155	-5.90052	5.67177985848301e-17	1.19974825712382e-14
ENSG00000108557.13	RAI1	chr17:17584786-17740325	0.475417	17.1958	0.387571	12.0191	5.14753	4.91917	0.431494	14.6075	5.06509	1.6816554929135e-16	3.5056424072562e-14
ENSG00000183779.5	ZNF703	chr8:37553268-37557537	0.33894	31.8489	0.268169	15.0832	6.51257	5.76179	0.303555	23.466	6.24921	2.55437324410886e-16	5.24887210618026e-14
ENSG00000120278.10	PLEKHG1	chr6:150920998-151164799	0.615958	13.762	0.261657	16.9156	4.45953	5.96128	0.438808	15.3388	5.11158	2.65862764342044e-16	5.38615493281121e-14
ENSG00000119242.4	CCDC92	chr12:124247041-124800570	0.457885	20.8174	0.302787	13.9763	5.47618	5.48269	0.380336	17.3969	5.49698	3.47164939026864e-16	6.93558400411446e-14
ENSG00000142700.7	DMRTA2	chr1:50883221-50889172	0.012544	10.6037	0.0536961	8.85284	8.87897	7.12042	0.03312	9.72827	7.99623	5.865476111754e-16	1.15573984097903e-13
ENSG00000105707.9	HPN	chr19:35531409-35598141	7.25443	0	6.37359	0.0158178	-9.50471	-7.94986	6.81401	0.0079089	-9.04505	7.52364013359796e-16	1.46243296867126e-13
ENSG00000185551.8	NR2F2	chr15:96670597-96883492	1.32202	48.0556	0.0616336	54.7845	5.17332	9.57918	0.691827	51.4201	6.20553	7.73365100079215e-16	1.48321114660526e-13
ENSG00000008516.12	MMP25	chr16:3096681-3110727	10.2098	0.49256	9.50375	0.148921	-4.34593	-5.90364	9.85677	0.32074	-4.92005	1.49950002910424e-15	2.80114395047212e-13
ENSG00000203727.3	SAMD5	chr6:147830062-148275073	0.0138685	5.65787	0.148453	4.24373	7.89155	4.7466	0.0811608	4.9508	5.84594	1.49214926964006e-15	2.80114395047212e-13
ENSG00000156966.6	B3GNT7	chr2:232260253-232265875	21.1522	0.24793	26.5718	0.300131	-6.35837	-6.42142	23.862	0.274031	-6.41845	2.48390945173991e-15	4.58058378895216e-13
ENSG00000139219.13	COL2A1	chr12:48366747-48398269	2.74268	69.9551	3.01935	104.694	4.66773	5.11116	2.88102	87.3246	4.91932	2.80884311995299e-15	5.11422777688656e-13
ENSG00000062038.9	CDH3	chr16:68670091-68756519	47.1717	2.60498	49.6702	1.66156	-4.17336	-4.8934	48.421	2.13327	-4.50126	3.85143277949847e-15	6.92487613753824e-13
ENSG00000015592.12	STMN4	chr8:27092839-27115937	0.0290956	25.9693	0.102364	2.93374	9.37614	4.7114	0.0657298	14.4515	7.67519	5.23714231113495e-15	9.30013024732903e-13
ENSG00000145284.7	SCD5	chr4:83550691-83720010	1.48596	42.0617	0.840086	27.5568	4.8137	5.01918	1.16302	34.8092	4.89754	5.40111322295636e-15	9.47434299987857e-13
ENSG00000112297.10	AIM1	chr6:106959729-107018326	5.14548	0.0228661	4.51213	0.179971	-7.29336	-4.57315	4.82881	0.101419	-5.50534	7.89132826083826e-15	1.36757669522768e-12
ENSG00000204252.8	HLA-DOA	chr6:32971954-32977389	11.9017	0.285594	11.6861	0.229772	-5.33262	-5.60822	11.7939	0.257683	-5.48919	9.63079571984378e-15	1.64915911469325e-12
ENSG00000141738.9	GRB7	chr17:37894179-37903544	11.8367	0.469549	10.439	0.0148377	-4.62666	-8.71662	11.1379	0.242193	-5.49433	1.10489841979594e-14	1.8697481023935e-12
ENSG00000065361.8	ERBB3	chr12:56473640-56507691	30.1117	2.4269	33.3253	0.572263	-3.62768	-5.83923	31.7185	1.49958	-4.39812	2.73118816640519e-14	4.56807099832235e-12
ENSG00000152022.7	LIX1L	chr1:145475981-145516076	0.513391	18.631	0.519592	16.314	5.15445	4.94597	0.516492	17.4725	5.06671	2.78411695027705e-14	4.60307335779139e-12
ENSG00000185664.9	PMEL	chr12:56347888-56367099	71.4647	2.21281	59.4553	4.52521	-5.00697	-3.71281	65.46	3.36901	-4.27819	3.45485691639838e-14	5.6471206688039e-12
ENSG00000156453.9	PCDH1	chr5:141232937-141258811	44.5887	2.2024	32.8901	2.05925	-4.33332	-3.99091	38.7394	2.13082	-4.18112	3.7499542881114e-14	6.06060027867352e-12
ENSG00000146530.7	VWDE	chr7:12370510-12443567	11.0711	0.423501	17.1215	0.0332477	-4.67592	-8.62982	14.0963	0.228374	-5.91704	3.97495987504478e-14	6.35286920473824e-12
ENSG00000169894.13	MUC3A	chr7:100547186-100611410	10.4455	0.0510444	10.2352	0.339443	-7.42019	-4.87375	10.3404	0.195244	-5.69108	4.13160114274442e-14	6.53065393815777e-12
ENSG00000076641.3	PAG1	chr8:81882525-82024303	0.179898	13.3395	0.0283231	7.00461	6.13542	7.51601	0.104111	10.1721	6.54339	4.6301947997439e-14	7.2392089129909e-12
ENSG00000019582.10	CD74	chr5:149781199-149792492	37.189	1.43747	26.8386	1.19342	-4.68366	-4.47964	32.0138	1.31544	-4.59982	5.27348870583221e-14	8.15632919835382e-12
ENSG00000131914.6	LIN28A	chr1:26737268-26756213	395.408	0.261648	287.486	42.777	-10.5074	-2.7483	341.447	21.5193	-3.98764	5.56097165814181e-14	8.50946982241615e-12
ENSG00000102096.9	PIM2	chrX:48770458-48776301	65.3859	2.44719	58.302	3.9528	-4.73412	-3.8792	61.844	3.19999	-4.27036	6.52690187576625e-14	9.88241648221281e-12
ENSG00000160867.10	FGFR4	chr5:176513886-176525145	30.3451	1.2307	21.5288	1.54134	-4.61271	-3.79535	25.9369	1.38602	-4.22107	6.7707382836342e-14	1.01448228616452e-11
ENSG00000175707.7	C1orf172	chr1:27276052-27286897	5.53449	0.0111264	3.74546	0.0110039	-8.03586	-7.48219	4.63997	0.0110651	-8.17559	7.73285950242213e-14	1.14669537198804e-11
ENSG00000141655.11	TNFRSF11A	chr18:59992519-60058516	4.13612	0.0480497	5.01592	0	-6.15833	-8.97324	4.57602	0.0240249	-7.30224	8.56903948797272e-14	1.24843272726021e-11
ENSG00000152939.10	MARVELD2	chr5:68710938-68740157	13.2144	0.461306	11.5486	0.275026	-4.8104	-5.34173	12.3815	0.368166	-5.05281	8.59252224685491e-14	1.24843272726021e-11
ENSG00000253507.1	CTD-2501M5.1	chr8:132320791-132329879	20.4918	0	11.2177	0	-11.0015	-10.1328	15.8548	0	-11.6312	1.02214503778707e-13	1.47025342235292e-11
ENSG00000115844.6	DLX2	chr2:172964166-172967628	0.0253306	5.01657	0.0530877	4.85769	7.15251	6.26973	0.0392091	4.93713	6.80464	1.24142857951426e-13	1.7679909591815e-11
ENSG00000043143.15	PHF15	chr5:133860002-133918918	9.74298	0.482063	6.96438	0.163242	-4.30893	-5.3312	8.35368	0.322653	-4.67304	2.48801300918e-13	3.50858618863188e-11
ENSG00000113356.6	POLR3G	chr5:89754019-89810370	79.85	1.02577	76.2845	8.38748	-6.2687	-3.18355	78.0673	4.70662	-4.05051	3.15572791805386e-13	4.40698935662977e-11
ENSG00000183742.7	MACC1	chr7:19958603-20257027	4.82239	0.020754	3.90578	0.0457708	-7.29582	-6.13364	4.36409	0.0332624	-6.83526	3.98984838853391e-13	5.5182672327569e-11
ENSG00000118898.10	PPL	chr16:4932507-5147809	6.06168	0.314841	5.86027	0.202521	-4.22429	-4.78775	5.96097	0.258681	-4.49989	4.13803164628121e-13	5.66870925715324e-11
ENSG00000127824.9	TUBA4A	chr2:220094478-220142892	18.6645	0.697081	15.128	0.10148	-4.72305	-7.08525	16.8963	0.39928	-5.38563	4.19886003110623e-13	5.69777383843698e-11
ENSG00000179178.6	TMEM125	chr1:43735664-43739673	6.62789	0	7.70034	0	-9.37458	-9.59065	7.16411	0	-10.4857	4.32095904215142e-13	5.80866120208467e-11
ENSG00000148680.10	HTR7	chr10:92500579-92617455	7.10649	0.0896023	6.62524	0.0506165	-6.15884	-6.77429	6.86586	0.0701094	-6.51535	5.73088641575187e-13	7.58799519503934e-11
ENSG00000180875.4	GREM2	chr1:240652872-240775449	0.0103413	6.24521	0.0155295	0.648657	8.2645	4.68929	0.0129354	3.44693	7.58845	5.75007978489494e-13	7.58799519503934e-11
ENSG00000185101.8	ANO9	chr11:417932-442011	5.29465	0.115474	5.72054	0.0204432	-5.4018	-7.55641	5.5076	0.0679586	-6.23951	6.27199394677084e-13	8.2014873573047e-11
ENSG00000171517.5	LPAR3	chr1:85277284-85358896	9.46347	0.146831	10.9728	0.203981	-5.91661	-5.68162	10.2181	0.175406	-5.82445	6.51565779106679e-13	8.44335330330674e-11
ENSG00000026025.9	VIM	chr10:17270257-17279592	111.043	2113.21	80.6431	1331.16	4.25012	4.04482	95.8431	1722.18	4.16735	6.82397914695521e-13	8.76393893301819e-11
ENSG00000136014.7	USP44	chr12:95910335-95945266	94.9781	2.48499	74.9144	10.289	-5.25064	-2.86293	84.9462	6.38699	-3.7323	7.06290267652588e-13	8.99051257514587e-11
ENSG00000163032.6	VSNL1	chr2:17720392-17838285	18.6261	0.973768	17.3279	0.672528	-4.24364	-4.6669	17.977	0.823148	-4.44052	8.14601764766472e-13	1.02782734950885e-10
ENSG00000184012.7	TMPRSS2	chr21:42836477-42903043	3.98463	0.0129114	4.65061	0	-7.44585	-8.86438	4.31762	0.0064557	-8.5597	1.18254695979184e-12	1.47910917127355e-10
ENSG00000196218.7	RYR1	chr19:38924338-39078204	4.32331	0.0329078	4.34624	0.224433	-6.65809	-4.21584	4.33478	0.12867	-5.02087	1.3746325848594e-12	1.70454440522566e-10
ENSG00000147601.8	TERF1	chr8:73921098-73960357	249.58	17.7937	226.571	18.3843	-3.80931	-3.6227	238.076	18.089	-3.71787	1.46787609442586e-12	1.80460937967706e-10
ENSG00000169418.8	NPR1	chr1:153651112-153666468	4.13471	0.020016	3.62797	0.102854	-7.1094	-5.01061	3.88134	0.061435	-5.87032	1.55522953082259e-12	1.87986735893716e-10
ENSG00000171282.8	BAHCC1	chr17:79369274-79433357	0.772078	9.65597	0.331312	9.18969	3.62753	4.75242	0.551695	9.42283	4.08197	1.55510924978676e-12	1.87986735893716e-10
ENSG00000100033.11	PRODH	chr22:18893540-18924066	28.2514	1.72931	30.5038	2.07678	-4.02225	-3.87011	29.3776	1.90304	-3.94479	1.59912253788945e-12	1.91681488208349e-10
ENSG00000092345.9	DAZL	chr3:16628298-16711813	8.5066	0	7.18522	0	-9.73413	-9.4909	7.84591	0	-10.6167	2.16652685769433e-12	2.57548118355994e-10
ENSG00000159618.11	GPR114	chr16:57576332-57625593	4.67896	0.159801	3.71314	0.0175597	-4.78735	-7.07782	4.19605	0.0886804	-5.48686	2.27163524573155e-12	2.67829519463956e-10
ENSG00000111321.6	LTBR	chr12:6456008-6500733	70.9424	0.963568	38.5954	0.134065	-6.18743	-8.06594	54.7689	0.548817	-6.62794	2.36146314618502e-12	2.76156795892076e-10
ENSG00000165349.7	SLC7A3	chrX:70145431-70150975	135.099	6.05485	115.25	11.7051	-4.47751	-3.29845	125.174	8.87997	-3.81649	2.40151401936609e-12	2.78575626246467e-10
ENSG00000142273.6	CBLC	chr19:45281125-45303891	5.19315	0	3.19892	0	-9.02324	-8.32595	4.19604	0	-9.7146	2.4543124394672e-12	2.8242264103437e-10
ENSG00000132297.7	HHLA1	chr8:133036466-133123406	5.28455	0.00854897	7.31868	0	-8.15702	-9.51741	6.30161	0.00427448	-9.40938	2.4844070813713e-12	2.83616757606704e-10
ENSG00000170091.6	NSG2	chr5:173472606-173670504	0.103415	22.2193	0.0728336	3.14645	7.61471	5.25194	0.0881243	12.6829	7.09008	2.71262672867185e-12	3.07231676104062e-10
ENSG00000007314.7	SCN4A	chr17:62015913-62050278	3.80144	0.0972349	3.42845	0.0587506	-5.15149	-5.64425	3.61495	0.0779927	-5.44684	3.04183599237521e-12	3.41826319643165e-10
ENSG00000215866.2	RP11-426L16.8	chr1:113362791-113420493	22.3437	0.271448	24.1837	0.0440525	-6.3115	-8.80605	23.2637	0.15775	-7.15959	3.35659009669787e-12	3.74272805820948e-10
ENSG00000132698.9	RAB25	chr1:156030950-156040295	24.0912	0.345107	9.2536	0.250657	-6.08471	-5.15135	16.6724	0.297882	-5.78299	3.4625769311917e-12	3.8312081983278e-10
ENSG00000186868.11	MAPT	chr17:43921016-44105700	0.47372	11.0862	0.392596	2.21308	4.51975	2.46515	0.433158	6.64964	3.92484	4.49288121568268e-12	4.93325216842593e-10
ENSG00000142698.10	C1orf94	chr1:34632483-34684732	4.86916	0.0218627	4.17541	0.0516517	-7.25862	-6.08509	4.52229	0.0367572	-6.76048	4.75391082570869e-12	5.18032222098438e-10
ENSG00000169184.5	MN1	chr22:28144264-28197486	1.6915	28.6037	0.955527	25.7985	4.07182	4.74039	1.32351	27.2011	4.35605	5.12330911423745e-12	5.54087806760838e-10
ENSG00000138161.8	CUZD1	chr10:124591664-124639157	18.9487	0.367689	13.3031	0.530358	-5.64952	-4.62279	16.1259	0.449024	-5.15092	5.33351015005795e-12	5.72516492525624e-10
ENSG00000173698.13	GPR64	chrX:19007426-19140755	9.40108	0.412328	8.78995	0.198374	-4.47792	-5.40025	9.09551	0.305351	-4.87398	5.94052872610337e-12	6.32952334787192e-10
ENSG00000112139.9	MDGA1	chr6:37598454-37667082	0.558153	7.37241	0.282168	4.91704	3.69974	4.07585	0.42016	6.14473	3.85444	5.99876642938992e-12	6.34457767061358e-10
ENSG00000144355.10	DLX1	chr2:172949467-172954405	0.0164139	27.601	0.0149577	14.6548	10.0297	9.19866	0.0156858	21.1279	9.99663	6.28009066050457e-12	6.59363679275166e-10
ENSG00000136943.6	CTSL2	chr9:99794939-99801925	185.328	12.9764	115.322	9.94814	-3.83509	-3.53377	150.325	11.4623	-3.71254	6.92397617442521e-12	7.21699081832842e-10
ENSG00000233639.1	AC018730.1	chr2:105424029-105469641	0.100248	21.5026	0	27.3726	7.60828	11.419	0.050124	24.4376	8.7925	7.17190123391722e-12	7.42162786681045e-10
ENSG00000144642.15	RBMS3	chr3:29305684-30051886	0.384014	12.3227	0.59411	8.53566	4.9681	3.82231	0.489062	10.4292	4.40048	7.64804558836906e-12	7.85782055307861e-10
ENSG00000167105.3	TMEM92	chr17:48348766-48358844	5.59282	0.0524548	4.18002	0.0434103	-6.4872	-6.2937	4.88642	0.0479326	-6.52995	8.14575454483644e-12	8.30982506190974e-10
ENSG00000076944.9	STXBP2	chr19:7694622-7712759	15.328	0.783327	10.7504	0.94807	-4.27305	-3.48946	13.0392	0.865698	-3.90509	1.02303133281503e-11	1.03628751346559e-09
ENSG00000143375.9	CGN	chr1:151482985-151511168	17.9035	0.728307	21.7177	2.17953	-4.60068	-3.31085	19.8106	1.45392	-3.76367	1.19057178013182e-11	1.1975653486305e-09
ENSG00000105997.16	HOXA3	chr7:27145815-27197555	0	10.5323	0	5.14018	10.042	9.00848	0	7.83624	10.6149	1.33404150743827e-11	1.33255923909667e-09
ENSG00000118946.7	PCDH17	chr13:58205943-58303445	0.516196	7.76555	0.179264	6.20322	3.88527	5.03687	0.34773	6.98438	4.30853	1.34558122797325e-11	1.33481657814946e-09
ENSG00000258649.1	CTD-2142D14.1	chr14:38059188-38672128	21.6462	0	15.3877	0	-11.0806	-10.5885	18.517	0	-11.855	1.59650448148295e-11	1.57288496312677e-09
ENSG00000154856.7	APCDD1	chr18:10454624-10488698	1.25796	13.5221	1.18231	31.6239	3.4158	4.72964	1.22013	22.573	4.20391	1.87389169417288e-11	1.83360939652944e-09
ENSG00000166900.10	STX3	chr11:59480295-59573354	24.626	1.82079	15.8318	0.481754	-3.75023	-5.00966	20.2289	1.15127	-4.12922	2.75540398075624e-11	2.67795478778364e-09
ENSG00000091656.11	ZFHX4	chr8:77318888-77779521	0.744366	24.47	0.371245	15.175	5.0202	5.31578	0.557805	19.8225	5.13872	2.90434552165815e-11	2.80376550225039e-09
ENSG00000132669.8	RIN2	chr20:19867164-19983101	0.342963	3.57184	0.0619114	2.68172	3.34311	5.22617	0.202437	3.12678	3.91624	2.9277230720094e-11	2.80749124451888e-09
ENSG00000089847.8	ANKRD24	chr19:4183350-4224811	4.20639	0.126826	3.04191	0.124734	-4.94559	-4.50153	3.62415	0.12578	-4.79442	3.06956394884131e-11	2.92401376424724e-09
ENSG00000197406.5	DIO3	chr14:102027687-102029789	0	0.346967	0	2.01114	5.15772	7.65903	0	1.17905	7.88759	3.14943241700779e-11	2.98035762409474e-09
ENSG00000170893.3	TRH	chr3:129693147-129696781	0.0257352	6.99151	0	2.06276	7.61418	7.69541	0.0128676	4.52713	7.9867	3.65139445626347e-11	3.43278809535254e-09
ENSG00000112379.8	KIAA1244	chr6:138483057-138665800	4.33122	0.494865	4.13311	0.113437	-3.10413	-5.06887	4.23217	0.304151	-3.77672	3.73399687938486e-11	3.48765007227739e-09
ENSG00000242732.2	RGAG4	chrX:71130937-71363424	0.205847	5.43152	0.303243	5.61101	4.65593	4.16548	0.254545	5.52126	4.41225	4.12901810098138e-11	3.83172879771072e-09
ENSG00000188848.11	BEND4	chr4:42112954-42154895	8.80536	0.78997	7.32377	0.24241	-3.462	-4.86071	8.06456	0.51619	-3.95261	4.50542876282187e-11	4.15423636695063e-09
ENSG00000176387.6	HSD11B2	chr16:67464554-67471456	16.1173	0.980857	13.2477	0.788776	-4.02469	-4.05289	14.6825	0.884817	-4.04494	4.7872410943326e-11	4.38596661789046e-09
ENSG00000121570.8	DPPA4	chr3:109044987-109056419	360.511	13.4986	300.828	51.9326	-4.73813	-2.53399	330.669	32.7156	-3.33714	5.25868604033828e-11	4.78740126609024e-09
ENSG00000167642.7	SPINT2	chr19:38734674-38795649	81.4913	11.4846	73.6676	4.1747	-2.82586	-4.13803	77.5794	7.82965	-3.30783	5.36278204835307e-11	4.85146270336544e-09
ENSG00000182107.5	TMEM30B	chr14:61654276-62125414	5.15638	0.142463	4.99252	0.032022	-5.08262	-6.89537	5.07445	0.0872425	-5.7831	6.06275551698004e-11	5.45041720976505e-09
ENSG00000179046.4	TRIML2	chr4:189012426-189030757	13.3222	0	19.9726	0	-10.3807	-10.9645	16.6474	0	-11.7015	6.20562129774452e-11	5.54420228240728e-09
ENSG00000140557.6	ST8SIA2	chr15:92937057-93044347	0.8695	17.2259	0.870082	15.7122	4.29259	4.15902	0.869791	16.469	4.23511	7.72346142966644e-11	6.8576709385384e-09
ENSG00000184226.10	PCDH9	chr13:66876966-67804468	0.207759	7.81604	0.161905	2.88359	5.16748	4.07318	0.184832	5.34981	4.81804	8.28683373221274e-11	7.31274947264712e-09
ENSG00000170608.2	FOXA3	chr19:46367246-46377055	6.39623	0.0107915	3.4869	0.0104116	-8.26734	-7.42054	4.94156	0.0106016	-8.30859	8.45793020624358e-11	7.41822366381754e-09
ENSG00000104332.6	SFRP1	chr8:41119480-41167016	355.587	22.2375	242.554	39.4795	-3.99853	-2.61883	299.07	30.8585	-3.27654	9.70106310121134e-11	8.41888895626466e-09
ENSG00000120659.10	TNFSF11	chr13:43136871-43182149	6.48834	0.067728	5.81924	0	-6.38549	-9.18716	6.15379	0.033864	-7.30807	9.71590355075038e-11	8.41888895626466e-09
ENSG00000008394.7	MGST1	chr12:16500075-16763528	719.362	37.1203	411.756	66.1308	-4.27607	-2.63821	565.559	51.6255	-3.45339	1.01235382576381e-10	8.66767704153965e-09
ENSG00000101443.13	WFDC2	chr20:44095909-44110172	78.3373	3.59558	65.7104	4.00644	-4.44158	-4.03235	72.0239	3.80101	-4.24222	1.01232120688725e-10	8.66767704153965e-09
ENSG00000148516.16	ZEB1	chr10:31596657-31818742	0.219312	32.7659	0.112557	16.7531	7.15918	7.09569	0.165935	24.7595	7.17869	1.05432677626239e-10	8.97363097618829e-09
ENSG00000089327.9	FXYD5	chr19:35645632-35660786	99.471	12.4082	46.94	2.12426	-3.00196	-4.45932	73.2055	7.26623	-3.33178	1.08348181716446e-10	9.16753085770214e-09
ENSG00000105131.3	EPHX3	chr19:15337729-15344246	11.7451	0.151695	15.4948	0.0711511	-6.18387	-7.57789	13.6199	0.111423	-6.87073	1.09970085673979e-10	9.25034919493864e-09
ENSG00000173262.7	SLC2A14	chr12:7917811-8250367	7.10949	0.616262	8.08852	0.431419	-3.50694	-4.19744	7.59901	0.52384	-3.84585	1.17491288255152e-10	9.82555052477967e-09
ENSG00000143995.13	MEIS1	chr2:66653866-66799890	0.213623	53.2541	0.236624	77.5433	7.89595	8.29673	0.225124	65.3987	8.15082	1.35493345022383e-10	1.12655276000113e-08
ENSG00000186487.12	MYT1L	chr2:1792884-2335032	0.0560639	3.08513	0.00466825	0.488661	5.54999	5.08729	0.0303661	1.7869	5.66298	1.37247653474766e-10	1.13458060205807e-08
ENSG00000188883.4	KLRG2	chr7:139137435-139168458	3.66381	0.0118035	3.18144	0.0217301	-7.39657	-6.65221	3.42263	0.0167668	-7.29894	1.41124225047925e-10	1.15996048747963e-08
ENSG00000115648.9	MLPH	chr2:238394070-238463961	7.22644	0.0739498	5.12629	0.133375	-6.42961	-5.16286	6.17637	0.103662	-5.83	1.77253351994794e-10	1.44864330403018e-08
ENSG00000092068.14	SLC7A8	chr14:23594503-23652883	94.3851	11.0243	85.9996	4.26873	-3.09671	-4.32924	90.1924	7.64651	-3.55927	1.99076374412071e-10	1.61780484154985e-08
ENSG00000106034.13	CPED1	chr7:120628730-120937498	0.0689856	6.22618	0.0834666	4.47069	6.30293	5.58312	0.0762261	5.34844	6.04238	2.30394300735689e-10	1.86179304594503e-08
ENSG00000130477.10	UNC13A	chr19:17712136-17799401	11.2298	1.39524	8.89769	0.522903	-2.99972	-4.06311	10.0637	0.959072	-3.3846	2.33448335017272e-10	1.87593343625053e-08
ENSG00000050344.7	NFE2L3	chr7:26191859-26226745	45.5267	4.18166	50.489	2.25938	-3.44144	-4.47588	48.0078	3.22052	-3.89582	2.66289529224254e-10	2.12794921575649e-08
ENSG00000139269.2	INHBE	chr12:57846105-57853063	4.86153	0.126845	4.48607	0.0794996	-5.15376	-5.65064	4.6738	0.103172	-5.43474	3.13717150016003e-10	2.49309805846972e-08
ENSG00000073350.9	LLGL2	chr17:73521160-73571289	13.1008	1.36453	11.7321	0.267451	-3.25374	-5.40332	12.4165	0.815991	-3.91932	3.34268417392059e-10	2.62738629276905e-08
ENSG00000182095.10	TNRC18	chr7:5346420-5465045	2.39882	66.6439	2.35404	42.5263	4.79029	4.16937	2.37643	54.5851	4.51874	3.33421373780036e-10	2.62738629276905e-08
ENSG00000134532.11	SOX5	chr12:23682439-24103966	1.05709	6.75272	0.23807	6.34649	2.66392	4.67941	0.64758	6.5496	3.32828	3.62233881543816e-10	2.83172399572079e-08
ENSG00000138434.11	SSFA2	chr2:182756559-182795465	2.6397	31.3066	2.8207	37.509	3.56302	3.72839	2.7302	34.4078	3.65323	4.23229074660973e-10	3.29066324860726e-08
ENSG00000137460.4	FHDC1	chr4:153857503-153900848	4.54242	0.370877	5.08294	0.297795	-3.57924	-4.04846	4.81268	0.334336	-3.82755	4.55619534476692e-10	3.52345773328642e-08
ENSG00000074370.13	ATP2A3	chr17:3827168-3867736	5.57759	0.48542	5.89662	0.37573	-3.4955	-3.93667	5.7371	0.430575	-3.72059	4.65039860336225e-10	3.57707665832955e-08
ENSG00000010278.7	CD9	chr12:6308880-6347425	127.469	6.09907	115.598	16.0529	-4.38316	-2.84743	121.534	11.076	-3.45526	5.09773821465852e-10	3.9003120467898e-08
ENSG00000127831.6	VIL1	chr2:219283814-219433084	3.73389	0.0250351	2.6002	0.0543104	-6.73959	-5.34297	3.16704	0.0396727	-6.14987	5.34232715913223e-10	4.06582189719354e-08
ENSG00000152217.12	SETBP1	chr18:42260137-42648475	0.905505	11.6241	0.760712	10.6155	3.66764	3.78519	0.833109	11.1198	3.7305	6.31073235194797e-10	4.77755653423261e-08
ENSG00000080709.9	KCNN2	chr5:113696665-114004107	22.7587	1.3289	16.3577	1.61658	-4.08793	-3.33094	19.5582	1.47274	-3.72668	6.3587485784276e-10	4.78870364147134e-08
ENSG00000078018.15	MAP2	chr2:210288781-210598842	4.18719	112.154	3.3366	141.492	4.74004	5.40198	3.76189	126.823	5.07335	6.39454095474653e-10	4.79057693193094e-08
ENSG00000105357.11	MYH14	chr19:50691442-50813802	11.903	0.599569	6.92549	0.60326	-4.2886	-3.49943	9.41425	0.601414	-3.95724	7.39401434219364e-10	5.51064778746701e-08
ENSG00000164344.11	KLKB1	chr4:187112673-187179625	5.96879	0.126382	6.45343	0.0627856	-5.45413	-6.47251	6.21111	0.0945838	-5.96396	7.48470077500723e-10	5.54948123441773e-08
ENSG00000064042.13	LIMCH1	chr4:41361623-41702061	7.30806	58.8974	3.94582	58.9436	3.00892	3.89753	5.62694	58.9205	3.38719	7.80397102627909e-10	5.75652919189735e-08
ENSG00000237515.6	SHISA9	chr16:12995476-13334272	15.2784	0.27613	10.753	1.69446	-5.73962	-2.65869	13.0157	0.985295	-3.7168	8.43543759216988e-10	6.19057828192712e-08
ENSG00000153093.14	ACOXL	chr2:111490149-111875799	8.50065	0.123387	4.41652	0.0393583	-5.99557	-6.48673	6.45859	0.0813726	-6.22562	1.05332584044158e-09	7.69088268472676e-08
ENSG00000131771.8	PPP1R1B	chr17:37782992-37792879	5.24817	0.136149	5.8497	0.276013	-5.16905	-4.35667	5.54894	0.206081	-4.71764	1.19026683271764e-09	8.60341614161334e-08
ENSG00000159753.8	RLTPR	chr16:67679029-67694713	3.31385	0.184357	2.55313	0.0793644	-4.09607	-4.84206	2.93349	0.131861	-4.42429	1.18537162129169e-09	8.60341614161334e-08
ENSG00000125945.9	ZNF436	chr1:23685940-23698332	0.706057	13.1075	0.472836	6.37836	4.19528	3.72584	0.589446	9.74293	4.03548	1.23197777291488e-09	8.86038414280383e-08
ENSG00000168671.5	UGT3A2	chr5:36035118-36071460	17.7707	0.19225	19.9465	0.9947	-6.45803	-4.31202	18.8586	0.593475	-4.97817	1.26028747025107e-09	9.01889302094098e-08
ENSG00000104635.8	SLC39A14	chr8:22224761-22291642	79.617	10.3383	75.6503	10.0579	-2.94386	-2.90978	77.6337	10.1981	-2.92777	1.31637827658277e-09	9.37365600513198e-08
ENSG00000165215.5	CLDN3	chr7:73183327-73184600	6.91141	0.559168	5.74921	0.10198	-3.60414	-5.68456	6.33031	0.330574	-4.23871	1.34087781953482e-09	9.50107712127527e-08
ENSG00000146197.7	SCUBE3	chr6:35182189-35220856	1.61812	17.191	1.14458	17.1445	3.40121	3.89315	1.38135	17.1677	3.63076	1.39733825597493e-09	9.85260464408992e-08
ENSG00000075223.9	SEMA3C	chr7:80371853-80551675	0.380451	18.808	0.3638	8.27731	5.59083	4.47056	0.372125	13.5427	5.16685	1.4756528377537e-09	1.03037817564317e-07
ENSG00000103257.4	SLC7A5	chr16:87863628-87903094	89.4811	11.5011	75.0283	8.07383	-2.95872	-3.21452	82.2547	9.78746	-3.07044	1.47294195201684e-09	1.03037817564317e-07
ENSG00000112759.12	SLC29A1	chr6:44187241-44201888	171.473	8.49388	142.312	28.7396	-4.3338	-2.30754	156.893	18.6167	-3.07476	1.49042070689086e-09	1.03566238878831e-07
ENSG00000050327.9	ARHGEF5	chr7:143883175-144077725	3.3343	0.501189	2.85913	0.0632012	-2.70977	-5.2926	3.09671	0.282195	-3.43296	1.65762821360567e-09	1.14138462075175e-07
ENSG00000130545.11	CRB3	chr19:6436089-6482568	5.90433	0	3.75966	0	-9.20807	-8.55829	4.832	0	-9.91797	1.65843566279975e-09	1.14138462075175e-07
ENSG00000163132.6	MSX1	chr4:4861392-4865663	0.112684	6.68173	0.169057	5.20596	5.76936	4.86444	0.140871	5.94384	5.34985	1.72371626175221e-09	1.18066355757352e-07
ENSG00000126016.9	AMOT	chrX:112017730-112084043	2.00059	33.9285	2.31948	26.8446	4.07723	3.5271	2.16003	30.3865	3.81121	1.82159181723834e-09	1.24179036488893e-07
ENSG00000158246.7	FAM46B	chr1:27331510-27339327	30.3165	1.25676	26.355	4.27387	-4.58136	-2.62164	28.3358	2.76531	-3.35476	2.05222184203156e-09	1.392413159235e-07
ENSG00000250208.2	RP11-143E21.7	chr12:130634893-130646801	0.0224329	3.04653	0.0444095	2.04433	6.55829	5.23866	0.0334212	2.54543	6.05269	2.06740663709869e-09	1.39613037878064e-07
ENSG00000164292.7	RHOBTB3	chr5:95036952-95160087	3.70796	48.9935	3.71015	37.1051	3.7203	3.31857	3.70906	43.0493	3.53509	2.13531638208403e-09	1.43525190840639e-07
ENSG00000140511.7	HAPLN3	chr15:89420518-89438857	19.5688	1.38609	18.6201	1.58793	-3.80983	-3.54336	19.0945	1.48701	-3.6782	2.15294470807697e-09	1.44037007818508e-07
ENSG00000253661.1	ZFHX4-AS1	chr8:77318888-77779521	0	12.5918	0.0257641	5.07896	10.2994	7.15271	0.0128821	8.83538	8.94945	2.22322818660194e-09	1.48050528870752e-07
ENSG00000088836.7	SLC4A11	chr20:3208062-3219887	9.76764	0.32554	8.06921	0.722228	-4.86493	-3.46385	8.91842	0.523884	-4.07657	2.24097841065774e-09	1.48544854649313e-07
ENSG00000100889.7	PCK2	chr14:24549315-24602058	32.3575	2.88735	26.3933	2.50774	-3.48174	-3.39052	29.3754	2.69754	-3.44246	2.25548783536768e-09	1.4882081203637e-07
ENSG00000140545.10	MFGE8	chr15:89441915-89456642	416.409	47.7958	355.352	53.3899	-3.12278	-2.73438	385.88	50.5928	-2.93102	2.36306512539977e-09	1.55206980656394e-07
ENSG00000198915.7	RASGEF1A	chr10:43689982-43762367	5.66344	0.215662	3.89758	0.0908484	-4.65199	-5.27602	4.78051	0.153255	-4.91835	2.69227644343256e-09	1.760259289197e-07
ENSG00000173890.12	GPR160	chr3:169755716-169803191	39.2814	1.95615	18.8184	0.563284	-4.32077	-5.03752	29.0499	1.25972	-4.52189	2.73609253159591e-09	1.78081244228396e-07
ENSG00000075945.8	KIFAP3	chr1:169890466-170054349	1.29082	32.4016	0.69036	7.36646	4.63902	3.39676	0.99059	19.884	4.32028	2.83482214319352e-09	1.83676043728358e-07
ENSG00000169764.10	UGP2	chr2:64068073-64118696	283.325	40.3174	248.726	27.4534	-2.81268	-3.17903	266.025	33.8854	-2.97264	2.883398933537e-09	1.85985696233167e-07
ENSG00000134873.4	CLDN10	chr13:96085857-96296957	31.7797	0.797434	21.2409	1.30151	-5.29907	-4.01822	26.5103	1.04947	-4.65223	3.02204753443264e-09	1.9405862381821e-07
ENSG00000088881.15	EBF4	chr20:2673479-2740754	0.695212	7.12862	0.597243	5.20707	3.33952	3.10289	0.646227	6.16784	3.2447	3.16294323665325e-09	2.02203446737868e-07
ENSG00000177106.9	EPS8L2	chr11:644232-727727	11.6152	1.01015	10.1915	0.446526	-3.5104	-4.48194	10.9033	0.728338	-3.89481	3.32765657292662e-09	2.11792089137064e-07
ENSG00000180891.8	CUEDC1	chr17:55938603-56032684	1.98375	18.1213	2.18157	24.2568	3.18493	3.46895	2.08266	21.1891	3.3437	3.43237138431577e-09	2.17494405251093e-07
ENSG00000132639.8	SNAP25	chr20:9966735-10349424	0.170068	4.48932	0.342333	4.52156	4.64309	3.685	0.2562	4.50544	4.11004	3.68701317247533e-09	2.31589508615219e-07
ENSG00000136383.6	ALPK3	chr15:85359910-85416713	4.41995	0.84522	3.75333	0.163726	-2.37292	-4.43713	4.08664	0.504473	-3.0056	3.67961175610557e-09	2.31589508615219e-07
ENSG00000168874.8	ATOH8	chr2:85978466-86015189	0.083816	6.16835	0.206362	8.04268	6.04124	5.21795	0.145089	7.10552	5.56606	3.72924578553159e-09	2.33223788604723e-07
ENSG00000101311.11	FERMT1	chr20:6055491-6104191	4.73564	0.151945	3.10105	0.115876	-4.87303	-4.62733	3.91834	0.13391	-4.81986	4.03262219304747e-09	2.51104924782662e-07
ENSG00000165023.5	DIRAS2	chr9:93372113-93405386	0.0189928	0.584557	0.0225085	3.70235	4.35805	6.83537	0.0207507	2.14345	6.38255	4.06169899011785e-09	2.51825337387307e-07
ENSG00000139364.6	TMEM132B	chr12:125671381-126146917	11.3333	0.359943	11.9935	1.93914	-4.9384	-2.62255	11.6634	1.14954	-3.33721	4.18569490097255e-09	2.58399293800812e-07
ENSG00000096433.5	ITPR3	chr6:33588521-33664351	8.73766	0.928316	7.12223	0.874697	-3.22075	-3.0111	7.92995	0.901506	-3.12983	4.31861919947719e-09	2.65465891304615e-07
ENSG00000105699.10	LSR	chr19:35739232-35758866	69.919	8.85965	67.9646	8.60137	-2.97894	-2.98068	68.9418	8.73051	-2.98052	4.39337055568927e-09	2.68911668395891e-07
ENSG00000078295.11	ADCY2	chr5:7396320-7830194	63.3816	4.14506	30.2818	5.33573	-3.93135	-2.50247	46.8317	4.74039	-3.30304	4.56412604668637e-09	2.78179614642105e-07
ENSG00000178403.3	NEUROG2	chr4:113434671-113578748	0	2.33729	0.011758	0.685155	7.87485	4.99772	0.005879	1.51122	7.12279	4.63228827430119e-09	2.81142761761808e-07
ENSG00000151962.3	RBM46	chr4:155675907-155749965	8.03003	0.0278351	4.00753	0.0704262	-7.73133	-5.6425	6.01878	0.0491306	-6.79808	4.99198806083973e-09	3.01700656584532e-07
ENSG00000143032.6	BARHL2	chr1:91177158-91182794	0.00922995	1.50328	0	0.0640478	6.29818	2.88846	0.00461498	0.783664	6.35798	5.63084543685093e-09	3.38887367211982e-07
ENSG00000181444.8	ZNF467	chr7:149461270-149470568	0.0884343	4.30247	0.0470303	2.58505	5.45321	5.50789	0.0677323	3.44376	5.56734	6.39586270588159e-09	3.83325371505836e-07
ENSG00000135525.13	MAP7	chr6:136663874-136871646	28.9495	0.372385	24.4336	6.49825	-6.24287	-1.90911	26.6915	3.43532	-2.95604	6.89649049936988e-09	4.11614603082724e-07
ENSG00000261685.2	RP11-401P9.4	chr16:50679719-50683160	0.396399	7.23006	0.375208	5.57614	4.15504	3.85814	0.385803	6.4031	4.03538	6.92761010681834e-09	4.11763404035021e-07
ENSG00000162551.9	ALPL	chr1:21835857-21904905	109.523	8.8199	93.9701	19.0566	-3.63282	-2.30131	101.747	13.9383	-2.86741	7.4923522212382e-09	4.43497919136997e-07
ENSG00000134207.8	SYT6	chr1:114631913-114696541	38.4107	3.69345	23.6138	3.6122	-3.37494	-2.70531	31.0123	3.65282	-3.08401	8.03899665575382e-09	4.73905442198208e-07
ENSG00000182809.6	CRIP2	chr14:105939298-105946499	1.24317	67.6469	1.82936	29.5878	5.75458	4.00822	1.53627	48.6174	4.97943	8.36979884474764e-09	4.91392598297347e-07
ENSG00000106785.10	TRIM14	chr9:100819020-100881494	6.27544	0.324354	6.386	0.53767	-4.23257	-3.54579	6.33072	0.431012	-3.86107	8.47926324553495e-09	4.95795620015345e-07
ENSG00000008311.10	AASS	chr7:121715700-121784334	347.568	34.5588	359.948	52.8113	-3.32979	-2.76864	353.758	43.6851	-3.01741	8.56458457898986e-09	4.98757022608057e-07
ENSG00000101017.9	CD40	chr20:44746910-44758502	7.83511	0.229036	4.81727	0.100305	-5.0365	-5.45164	6.32619	0.16467	-5.22167	8.81965394323639e-09	5.1114575411083e-07
ENSG00000162873.9	KLHDC8A	chr1:205305219-205326166	0.727064	8.80362	0.45575	10.2058	3.57987	4.4551	0.591407	9.50471	3.99503	8.8483935465515e-09	5.1114575411083e-07
ENSG00000112541.8	PDE10A	chr6:165740775-166401536	1.15439	8.43147	0.474481	10.5137	2.85792	4.44106	0.814435	9.47258	3.53182	8.94952409389451e-09	5.14919818266314e-07
ENSG00000179455.6	MKRN3	chr15:23810453-23873064	0	3.8044	0	4.87754	8.57531	8.93296	0	4.34097	9.76353	1.00610965389703e-08	5.76568974567925e-07
ENSG00000164142.11	FAM160A1	chr4:152330367-152584784	3.92112	0.263396	3.72013	0.311455	-3.84588	-3.53654	3.82063	0.287426	-3.70955	1.05757498710948e-08	6.01904600577732e-07
ENSG00000181392.10	SYNE4	chr19:36494208-36505145	8.58341	0.225341	4.27661	0.0796692	-5.19041	-5.57908	6.43001	0.152505	-5.35247	1.05868926547668e-08	6.01904600577732e-07
ENSG00000211772.4	TRBC2	chr7:142498724-142500432	14.3482	0	7.07951	0.222695	-10.4877	-4.92918	10.7139	0.111348	-6.52557	1.07721867780207e-08	6.10028089035629e-07
ENSG00000156687.6	UNC5D	chr8:35092974-35654068	9.3978	1.27422	9.53142	0.902753	-2.87296	-3.38591	9.46461	1.08849	-3.11437	1.225669198751e-08	6.89313539856832e-07
ENSG00000157992.8	KRTCAP3	chr2:27665232-27712656	27.8666	0.910821	26.6012	1.24757	-4.91999	-4.40332	27.2339	1.0792	-4.65097	1.22680941465065e-08	6.89313539856832e-07
ENSG00000134686.12	PHC2	chr1:33772366-33896653	7.71062	49.0912	3.83573	68.8783	2.66897	4.16293	5.77318	58.9847	3.35178	1.25597572273272e-08	7.02955439524806e-07
ENSG00000114812.8	VIPR1	chr3:42530790-42579059	4.3703	0.0947475	4.55441	0.0998944	-5.38604	-5.37624	4.46236	0.0973209	-5.44825	1.291671488437e-08	7.15070069871041e-07
ENSG00000168404.8	MLKL	chr16:74705752-74734858	4.29922	0.19635	3.10414	0.0301208	-4.38426	-6.27834	3.70168	0.113235	-4.97039	1.29253488714176e-08	7.15070069871041e-07
ENSG00000197461.8	PDGFA	chr7:536894-559933	11.899	1.7582	13.3933	0.17779	-2.7517	-6.15733	12.6461	0.967995	-3.70069	1.29083067493346e-08	7.15070069871041e-07
ENSG00000241484.5	ARHGAP8	chr22:45064592-45258665	14.6167	1.32976	10.8285	0.495727	-3.44856	-4.42166	12.7226	0.912744	-3.79373	1.3109578493243e-08	7.22483436960946e-07
ENSG00000188522.10	FAM83G	chr17:18853657-18950950	5.28378	0.600943	4.3462	0.285883	-3.11518	-3.87997	4.81499	0.443413	-3.42613	1.33206505496731e-08	7.31313883612589e-07
ENSG00000166963.8	MAP1A	chr15:43803155-43823818	0.897698	9.4076	0.963733	8.45932	3.37508	3.12065	0.930716	8.93346	3.25588	1.37114423853177e-08	7.49906415476845e-07
ENSG00000069431.6	ABCC9	chr12:21950334-22094336	0	5.38479	0	2.66644	9.07542	8.06417	0	4.02562	9.65486	1.3767469286062e-08	7.50118478070893e-07
ENSG00000112796.4	ENPP5	chr6:46128151-46138708	8.05987	0.536153	9.25163	0.209889	-3.88517	-5.39642	8.65575	0.373021	-4.51795	1.41485731531645e-08	7.67973872585353e-07
ENSG00000103044.6	HAS3	chr16:69139466-69442474	11.9344	0.659018	14.2983	0.7237	-4.15815	-4.28552	13.1164	0.691359	-4.23594	1.45433422734521e-08	7.85984972560507e-07
ENSG00000162878.8	PKDCC	chr2:42275159-42285668	95.9253	10.344	71.2837	12.18	-3.21187	-2.54808	83.6045	11.262	-2.89156	1.45896821241418e-08	7.85984972560507e-07
ENSG00000129667.8	RHBDF2	chr17:74466972-74497872	6.88531	0.961187	8.15424	0.2541	-2.8278	-4.95016	7.51977	0.607644	-3.61853	1.52773172768695e-08	8.1995870041228e-07
ENSG00000128849.9	CGNL1	chr15:57668164-57842925	19.8699	2.69559	16.8036	2.25	-2.87729	-2.89523	18.3368	2.4728	-2.888	1.63827239357728e-08	8.76018963167864e-07
ENSG00000256288.1	RP11-277P12.10	chr12:10485459-10490891	39.4357	0	13.939	0	-11.9457	-10.4459	26.6873	0	-12.3822	1.71032697133283e-08	9.11160857616718e-07
ENSG00000059804.11	SLC2A3	chr12:7917811-8250367	231.997	17.6554	247.68	23.8217	-3.71517	-3.37758	239.839	20.7386	-3.53136	1.74554836211399e-08	9.26493270872605e-07
ENSG00000140835.7	CHST4	chr16:71481499-71598992	3.60461	0.0339629	4.7831	0.0291702	-6.3614	-6.93506	4.19386	0.0315665	-6.84333	1.78093419200678e-08	9.41799905067117e-07
ENSG00000171016.7	PYGO1	chr15:55831087-55881145	0.882782	8.25771	0.556253	11.1984	3.21111	4.30699	0.719518	9.72805	3.7478	1.79934718029109e-08	9.48051642538718e-07
ENSG00000205744.5	DENND1C	chr19:6436089-6482568	4.76317	0.116127	3.45375	0.0301249	-5.242	-6.4317	4.10846	0.0731259	-5.71841	1.8383522831744e-08	9.6506785551754e-07
ENSG00000111432.4	FZD10	chr12:130647003-130650285	0.190425	3.41261	0.0156802	2.63256	4.09397	6.68514	0.103053	3.02258	4.80836	1.920887509999e-08	1.00472894341184e-06
ENSG00000171126.7	KCNG3	chr2:42669156-42721237	3.09443	0.0155507	3.42696	0.0391956	-6.92482	-6.12646	3.2607	0.0273731	-6.65645	2.15991898518217e-08	1.12566212619059e-06
ENSG00000253313.1	C1orf210	chr1:43747553-43751288	4.15919	0	3.93495	0	-8.70362	-8.62386	4.04707	0	-9.66252	2.21688090378127e-08	1.15117743393465e-06
ENSG00000110660.9	SLC35F2	chr11:107661716-107799019	17.0461	1.64901	15.8593	1.56456	-3.36189	-3.33322	16.4527	1.60678	-3.35203	2.25828657072039e-08	1.16846021702309e-06
ENSG00000215845.6	TSTD1	chr1:160965000-161008784	31.5208	2.22677	43.5543	0.918529	-3.81727	-5.55205	37.5375	1.57265	-4.57268	2.29330880223334e-08	1.18232809359586e-06
ENSG00000122574.6	WIPF3	chr7:29846101-29956682	4.96037	0.466518	3.96904	0.245536	-3.38275	-3.96082	4.46471	0.356027	-3.63	2.36093393400352e-08	1.21284548952524e-06
ENSG00000116661.9	FBXO2	chr1:11708423-11723384	15.4312	1.61364	10.7016	0.257972	-3.24948	-5.32095	13.0664	0.935806	-3.79637	2.44307313560347e-08	1.25057523069467e-06
ENSG00000111704.6	NANOG	chr12:7917811-8250367	10.9746	0.132641	18.3559	0.0495845	-6.26695	-8.26788	14.6653	0.0911128	-7.25395	2.49573752192153e-08	1.27300313884111e-06
ENSG00000109854.9	HTATIP2	chr11:20385230-20405329	22.7006	0.910139	15.2087	0.759055	-4.62537	-4.30661	18.9547	0.834597	-4.49709	2.55450306705916e-08	1.29837357302399e-06
ENSG00000185666.10	SYN3	chr22:32908538-33454358	7.9499	0.662168	4.06039	0.189002	-3.56586	-4.35431	6.00515	0.425585	-3.80303	2.71156670215413e-08	1.3733512480206e-06
ENSG00000115902.6	SLC1A4	chr2:65215610-65250999	0.797712	13.1247	0.587063	7.12589	4.0234	3.57914	0.692387	10.1253	3.86057	2.9535469056132e-08	1.49066030492422e-06
ENSG00000126010.5	GRPR	chrX:16141678-16189587	6.38951	0.166801	7.1968	0.0665737	-5.17776	-6.55637	6.79315	0.116687	-5.80389	3.00944956042655e-08	1.50907844819588e-06
ENSG00000164542.8	KIAA0895	chr7:36363829-36493400	0.234395	9.95912	0.48327	9.96709	5.35018	4.33817	0.358832	9.96311	4.77597	3.01102276579684e-08	1.50907844819588e-06
ENSG00000100154.10	TTC28	chr22:28247656-29075853	3.00949	18.8511	1.24729	15.798	2.64304	3.65227	2.12839	17.3245	3.02201	3.53771624162286e-08	1.76689272289942e-06
ENSG00000187140.4	FOXD3	chr1:63786554-63790797	5.96254	0.0815969	4.6241	0.0335791	-6.02691	-6.73251	5.29332	0.057588	-6.40351	3.95353476420933e-08	1.96773854838709e-06
ENSG00000107438.4	PDLIM1	chr10:96997328-97050781	130.937	22.2907	88.3789	9.84023	-2.55382	-3.16564	109.658	16.0655	-2.77059	4.05074490269045e-08	2.003427821413e-06
ENSG00000109625.13	CPZ	chr4:8560451-8621488	10.9469	0.202788	15.7173	0.118537	-5.68628	-6.93494	13.3321	0.160662	-6.33105	4.05309716373182e-08	2.003427821413e-06
ENSG00000175745.7	NR2F1	chr5:92746994-92930321	0.0862666	28.855	0.0728329	105.658	8.22807	10.3171	0.0795498	67.2565	9.63576	4.06785629289155e-08	2.00383715469014e-06
ENSG00000140488.9	CELF6	chr15:72533521-72671129	0.00529815	1.74413	0.0529382	0.178555	6.84126	1.58298	0.0291182	0.961342	4.82392	4.48306144187217e-08	2.20083125528632e-06
ENSG00000118495.13	PLAGL1	chr6:144261436-144385735	0.708101	36.4301	0.676551	83.6496	5.6652	6.92902	0.692326	60.0399	6.42806	4.6954248688893e-08	2.2929300820394e-06
ENSG00000165731.12	RET	chr10:43572474-43625799	4.05207	0.262629	2.74167	0.19454	-3.8972	-3.74985	3.39687	0.228584	-3.86431	4.70254709539505e-08	2.2929300820394e-06
ENSG00000111087.5	GLI1	chr12:57853917-57914300	9.37647	1.67679	7.98846	0.109905	-2.47631	-6.05976	8.68247	0.893347	-3.27359	4.87501744555771e-08	2.36899496408453e-06
ENSG00000139209.11	SLC38A4	chr12:47158545-47226191	16.2986	1.80259	12.8139	0.808633	-3.16951	-3.96947	14.5563	1.30561	-3.47382	4.90869741923589e-08	2.37733009017808e-06
ENSG00000101695.4	RNF125	chr18:29598334-30050447	7.89241	0.705086	7.37187	0.791805	-3.4661	-3.20266	7.63214	0.748445	-3.34146	5.13936300616526e-08	2.48069119062688e-06
ENSG00000164626.8	KCNK5	chr6:39156748-39197226	9.74969	0.464051	8.86469	1.51395	-4.36372	-2.54188	9.30719	0.989	-3.2278	5.18539322355843e-08	2.49453833202891e-06
ENSG00000138100.9	TRIM54	chr2:27505259-27531313	2.72651	0	4.50163	0.0122878	-8.09619	-7.66125	3.61407	0.0061439	-8.34322	5.22687954659155e-08	2.50611451327243e-06
ENSG00000108292.12	MLLT6	chr17:36858704-36886056	2.61351	19.7626	2.57651	14.1483	2.91393	2.45257	2.59501	16.9554	2.70559	5.35822845435919e-08	2.56055674709311e-06
ENSG00000269067.1	ZNF728	chr19:23158269-23185978	4.71719	0	5.65062	0	-8.88484	-9.14482	5.18391	0	-10.0193	5.95634655318241e-08	2.83695658347602e-06
ENSG00000111186.8	WNT5B	chr12:1639056-1756409	0.36401	9.06789	0.491001	7.6461	4.60121	3.93372	0.427505	8.35699	4.27306	6.56407198732972e-08	3.11609278764854e-06
ENSG00000164048.9	ZNF589	chr3:48282589-48343175	42.7961	5.09363	30.5041	6.4468	-3.06822	-2.24058	36.6501	5.77022	-2.66607	6.70691025943612e-08	3.17342753854372e-06
ENSG00000184702.13	SEPT5	chr22:19701986-19712295	3.92664	50.3482	2.74441	21.2595	3.67719	2.94897	3.33552	35.8038	3.42217	6.78493088985753e-08	3.19981789900691e-06
ENSG00000106538.5	RARRES2	chr7:150035407-150038763	143.775	3.1433	89.4324	25.6749	-5.5109	-1.80004	116.604	14.4091	-3.01612	7.08541688558422e-08	3.33060903536743e-06
ENSG00000149150.4	SLC43A1	chr11:57252006-57283259	9.8674	0.7356	7.4322	0.411402	-3.72766	-4.14246	8.6498	0.573501	-3.90311	7.13795005411432e-08	3.33351537592144e-06
ENSG00000203618.5	GP1BB	chr22:19701986-19712295	0.855048	17.6476	1.03773	7.93485	4.35137	2.92275	0.946389	12.7912	3.74954	7.12437013048809e-08	3.33351537592144e-06
ENSG00000125731.8	SH2D3A	chr19:6752170-6767599	4.40544	0.177878	4.42711	0.168225	-4.55469	-4.63785	4.41627	0.173052	-4.6341	7.97069364608031e-08	3.71037078981292e-06
ENSG00000269404.1	SPIB	chr19:50887460-50934570	7.55945	0.146256	4.5729	0.0393273	-5.5982	-6.53774	6.06617	0.0927917	-5.95612	8.03670558366173e-08	3.72903139081904e-06
ENSG00000226887.3	ERVMER34-1	chr4:53588784-53617807	23.4875	1.99397	22.5929	3.87154	-3.55157	-2.5418	23.0402	2.93276	-2.97168	8.5934383529591e-08	3.97453431733002e-06
ENSG00000007264.9	MATK	chr19:3777970-3802127	3.71409	0.073617	2.94833	0.0532936	-5.47695	-5.54658	3.33121	0.0634553	-5.6069	9.45081051191899e-08	4.34895590538194e-06
ENSG00000151491.8	EPS8	chr12:15773091-16035263	2.63279	21.0594	1.24808	18.9858	2.99502	3.91638	1.94043	20.0226	3.36382	9.46345382636643e-08	4.34895590538194e-06
ENSG00000106789.8	CORO2A	chr9:100883256-100954922	5.87116	0.796415	4.98748	0.321221	-2.86651	-3.91533	5.42932	0.558818	-3.2688	9.71102365590961e-08	4.44851478556063e-06
ENSG00000099337.3	KCNK6	chr19:38810483-38819660	3.90038	0.180984	4.43774	0.0234626	-4.35578	-7.05438	4.16906	0.102223	-5.28276	1.01607351479679e-07	4.62506374583451e-06
ENSG00000104154.5	SLC30A4	chr15:45722726-45878488	0.02048	2.40998	0.00669751	0.577087	6.31099	5.13587	0.0135888	1.49353	6.33298	1.01567986281884e-07	4.62506374583451e-06
ENSG00000109861.9	CTSC	chr11:88026777-88070955	316.531	77.68	243.525	18.2647	-2.02659	-3.73621	280.028	47.9724	-2.54517	1.12583285923111e-07	5.10851099280134e-06
ENSG00000107282.4	APBA1	chr9:72045203-72287222	0.0513293	2.69186	0.208172	1.0044	5.46123	2.21709	0.129751	1.84813	3.7816	1.16226168019158e-07	5.25722390184772e-06
ENSG00000019549.4	SNAI2	chr8:49830248-49834299	0.22197	26.1576	0.181677	20.8136	6.8177	6.7634	0.201823	23.4856	6.82754	1.17109105871489e-07	5.28055604656894e-06
ENSG00000177182.6	CLVS1	chr8:61969716-62627155	0.11443	3.7743	0.0732154	3.53379	4.92662	5.4123	0.0938227	3.65404	5.21048	1.22942390488668e-07	5.52626045246562e-06
ENSG00000186603.4	HPDL	chr1:45792544-45794347	16.455	0.722777	12.9993	2.20909	-4.48989	-2.5515	14.7271	1.46593	-3.32416	1.28630686674029e-07	5.76393706267676e-06
ENSG00000139044.6	B4GALNT3	chr12:569529-672675	5.58503	0.558182	7.11613	0.780868	-3.29972	-3.17162	6.35058	0.669525	-3.23608	1.30116632628747e-07	5.81241504264563e-06
ENSG00000149571.6	KIRREL3	chr11:126225534-126875953	0.0752346	1.71934	0.125335	1.79304	4.34264	3.73583	0.100285	1.75619	4.06418	1.39880307963296e-07	6.22922089704038e-06
ENSG00000167123.12	CERCAM	chr9:131174029-131199626	1.43617	10.9691	0.924765	11.5217	2.92445	3.62486	1.18047	11.2454	3.24645	1.42328394215625e-07	6.31867784690601e-06
ENSG00000166073.4	GPR176	chr15:39892231-40213093	49.9285	9.80544	40.3821	4.86969	-2.34702	-3.04921	45.1553	7.33757	-2.6207	1.55833066668611e-07	6.89693178757321e-06
ENSG00000139329.4	LUM	chr12:91496405-91505608	0.17237	105.174	0	51.5532	9.17183	12.3321	0.086185	78.3636	9.74726	1.60534058985866e-07	7.08319602592853e-06
ENSG00000148541.8	FAM13C	chr10:60936349-61122939	0.447445	7.54599	0.215173	2.53068	4.04595	3.4961	0.331309	5.03834	3.90652	1.65131831216095e-07	7.26378061227004e-06
ENSG00000111752.5	PHC1	chr12:9066491-9102551	72.8886	11.4031	48.1195	9.92008	-2.6752	-2.27704	60.504	10.6616	-2.50405	1.75559925168304e-07	7.6989450110393e-06
ENSG00000134917.9	ADAMTS8	chr11:130274819-130298888	3.6232	0.332974	3.48324	0.306429	-3.40507	-3.46461	3.55322	0.319701	-3.45397	1.7837891945133e-07	7.79879142063203e-06
ENSG00000090776.5	EFNB1	chrX:68048839-68061990	2.74678	12.7814	1.60949	25.378	2.21412	3.97053	2.17814	19.0797	3.12794	1.80570838149029e-07	7.87069980586556e-06
ENSG00000166206.8	GABRB3	chr15:26788692-27194354	45.318	10.2496	44.9655	6.09085	-2.14343	-2.88206	45.1418	8.17022	-2.46529	1.83756242644354e-07	7.98534681026101e-06
ENSG00000115339.9	GALNT3	chr2:166604100-166651192	11.6027	0.625022	8.67173	0.413199	-4.19275	-4.35858	10.1372	0.519111	-4.27436	1.99214672747063e-07	8.63103570118601e-06
ENSG00000117266.11	CDK18	chr1:205473722-205501921	18.9284	2.22838	12.5898	2.25956	-3.08078	-2.47291	15.7591	2.24397	-2.80931	2.02149364783531e-07	8.73188127040934e-06
ENSG00000075461.5	CACNG4	chr17:64961025-65029514	1.67379	29.2668	1.6337	24.4201	4.11997	3.89364	1.65374	26.8435	4.01667	2.09082982959003e-07	8.97746157278297e-06
ENSG00000163666.4	HESX1	chr3:57231943-57260549	38.9962	1.75605	24.9722	2.22743	-4.46511	-3.48099	31.9842	1.99174	-4.00187	2.08902687725304e-07	8.97746157278297e-06
ENSG00000184384.8	MAML2	chr11:95709761-96076382	0.532446	7.32492	0.742989	4.64409	3.75723	2.6278	0.637717	5.98451	3.22018	2.10633929882542e-07	9.01713823640027e-06
ENSG00000100095.14	SEZ6L	chr22:26565439-26779562	0.608487	17.7628	0.135566	1.18064	4.84478	3.03199	0.372026	9.47172	4.65165	2.17064885446893e-07	9.26487036281338e-06
ENSG00000146215.9	CRIP3	chr6:43263431-43276535	23.6084	0.871927	14.0326	0.54475	-4.74311	-4.66183	18.8205	0.708338	-4.72196	2.41617529920863e-07	1.02798431116503e-05
ENSG00000152977.5	ZIC1	chr3:147103832-147228080	1.50917	112.093	1.00764	145.263	6.2054	7.1574	1.2584	128.678	6.67036	2.42273833067955e-07	1.02798431116503e-05
ENSG00000115194.6	SLC30A3	chr2:27476551-27504367	6.78722	0.186498	8.90604	0.183844	-5.11236	-5.52344	7.84663	0.185171	-5.36762	2.49062711893117e-07	1.05368177878547e-05
ENSG00000177875.3	C12orf68	chr12:48577365-48579709	0.197151	4.20077	0.179887	6.05215	4.34533	4.99661	0.188519	5.12646	4.72882	2.58883730469045e-07	1.09201864488761e-05
ENSG00000205593.5	DENND6B	chr22:50750391-50765489	0.959815	9.54	0.345702	5.34388	3.29972	3.91184	0.652759	7.44194	3.50102	2.70426973890452e-07	1.13737473463165e-05
ENSG00000132359.9	RAP1GAP2	chr17:2680349-2941033	5.88262	1.34953	5.35788	0.342643	-2.1158	-3.92807	5.62025	0.846086	-2.72454	2.73104944901027e-07	1.14528907506017e-05
ENSG00000242265.1	PEG10	chr7:94285636-94299007	31.3928	205.057	25.1438	202.832	2.70713	3.01151	28.2683	203.945	2.8507	2.74102834281056e-07	1.1461323163659e-05
ENSG00000162992.3	NEUROD1	chr2:182401402-182545603	0	1.8449	0.0315294	0.747486	7.5352	4.18902	0.0157647	1.29619	5.96956	2.77586869280835e-07	1.1573360949958e-05
ENSG00000102755.6	FLT1	chr13:28874488-29069265	27.8457	5.61226	37.7274	0.0965741	-2.30875	-8.46799	32.7866	2.85442	-3.51953	2.79608318783416e-07	1.16239481427187e-05
ENSG00000130303.8	BST2	chr19:17513747-17516457	52.246	0.941216	24.0702	0.287849	-5.77968	-6.33713	38.1581	0.614533	-5.94485	2.81050218118242e-07	1.16502199925441e-05
ENSG00000204525.8	HLA-C	chr6:31236525-31239907	97.9444	5.75626	75.8122	22.6891	-4.0864	-1.73998	86.8783	14.2227	-2.61038	2.95239119969376e-07	1.22032169587342e-05
ENSG00000039523.12	FAM65A	chr16:67551609-67580689	1.20553	12.3757	1.4566	7.94336	3.34901	2.43909	1.33106	10.1595	2.92748	3.06558610705225e-07	1.25986830182399e-05
ENSG00000170873.14	MTSS1	chr8:125500725-125740730	1.61923	12.9495	1.83347	26.1894	2.99175	3.82904	1.72635	19.5694	3.499	3.06306451705913e-07	1.25986830182399e-05
ENSG00000120658.8	ENOX1	chr13:43787653-44361044	0.147002	2.9834	0.0853549	1.31166	4.25293	3.7929	0.116178	2.14753	4.15083	3.16985084034418e-07	1.29900668055586e-05
ENSG00000129521.8	EGLN3	chr14:34393436-34931980	14.5494	0.913034	13.2576	2.14902	-3.97942	-2.61946	13.9035	1.53103	-3.17869	3.32596730554764e-07	1.35911118531242e-05
ENSG00000102678.6	FGF9	chr13:22245521-22278637	0.0881633	2.37402	0.0572136	3.98289	4.60207	5.89254	0.0726885	3.17845	5.35675	3.48541796374296e-07	1.42023376743566e-05
ENSG00000180447.5	GAS1	chr9:89559278-89562104	2.21243	43.3004	2.29893	38.0132	4.28451	4.04158	2.25568	40.6568	4.16885	3.54792558489039e-07	1.44162038454981e-05
ENSG00000074211.9	PPP2R2C	chr4:6322304-6565327	1.92694	0.119641	1.39275	0.0809669	-3.90119	-3.94677	1.65985	0.100304	-3.98276	3.56925416687651e-07	1.44620146299583e-05
ENSG00000180921.6	FAM83H	chr8:144806102-144815971	9.46455	0.863574	9.88759	2.23788	-3.43906	-2.13851	9.67607	1.55073	-2.63758	3.74737293044991e-07	1.51410708515707e-05
ENSG00000168394.9	TAP1	chr6:32808493-32847625	4.32154	0.266371	4.82247	0.362771	-3.9702	-3.6964	4.572	0.314571	-3.8402	3.85458390453018e-07	1.55306260175804e-05
ENSG00000223572.5	CKMT1A	chr15:43825659-44010458	13.6547	1.62124	9.5563	1.04447	-3.06642	-3.18144	11.6055	1.33285	-3.11744	3.8811961721662e-07	1.55941692012398e-05
ENSG00000099284.8	H2AFY2	chr10:71812551-71892690	18.855	88.271	6.01176	112.275	2.22639	4.22083	12.4334	100.273	3.01113	3.95696262231177e-07	1.58143596626087e-05
ENSG00000101282.4	RSPO4	chr20:939094-982907	3.2429	0.299277	2.82217	0.0558446	-3.39476	-5.4267	3.03254	0.177561	-4.05645	3.95798767974077e-07	1.58143596626087e-05
ENSG00000140807.4	NKD1	chr16:50582240-50670647	0.702197	6.04208	0.343636	4.63324	3.08708	3.7148	0.522917	5.33766	3.33918	3.98793508314283e-07	1.58898776276805e-05
ENSG00000183486.8	MX2	chr21:42733869-42781317	4.71727	0.335474	3.27908	0.0365757	-3.77436	-6.14196	3.99817	0.186025	-4.38931	4.10826675661483e-07	1.63241185157867e-05
ENSG00000171608.11	PIK3CD	chr1:9711789-9884584	5.73484	0.955452	4.79469	0.500681	-2.57299	-3.23395	5.26477	0.728066	-2.84572	4.34828672026491e-07	1.72302358634409e-05
ENSG00000143344.10	RGL1	chr1:183605207-183897666	1.31528	9.96217	0.854032	11.067	2.91161	3.68034	1.08466	10.5146	3.27113	4.4535250898912e-07	1.75987650804931e-05
ENSG00000104369.4	JPH1	chr8:75146934-75401107	7.10267	0.261504	4.02217	0.69683	-4.71135	-2.51212	5.56242	0.479167	-3.52343	4.63583993842884e-07	1.82690196368111e-05
ENSG00000134202.6	GSTM3	chr1:110210643-110318050	1.73348	27.8274	1.38982	24.8531	3.99699	4.15069	1.56165	26.3403	4.07179	4.88630470231522e-07	1.90990779451364e-05
ENSG00000141736.8	ERBB2	chr17:37827374-37887040	92.6149	18.017	83.0668	17.597	-2.36124	-2.2383	87.8409	17.807	-2.30212	4.8640068318964e-07	1.90990779451364e-05
ENSG00000151364.11	KCTD14	chr11:77726760-77791265	16.0183	1.48232	8.959	0.801387	-3.42499	-3.46649	12.4886	1.14185	-3.44544	4.88546689443893e-07	1.90990779451364e-05
ENSG00000137642.7	SORL1	chr11:121318039-121504387	18.6247	3.12016	20.093	4.16475	-2.57368	-2.26765	19.3589	3.64245	-2.4084	4.93992614951112e-07	1.92563408494764e-05
ENSG00000170558.4	CDH2	chr18:25530929-25757410	31.0032	171.516	18.5172	188.108	2.46747	3.34392	24.7602	179.812	2.86014	5.18571059672472e-07	2.01598003306185e-05
ENSG00000109436.7	TBC1D9	chr4:141541918-141677274	0.37877	13.148	0.220695	6.55579	5.08088	4.83091	0.299733	9.85189	5.01552	5.21531788125031e-07	2.02202513218071e-05
ENSG00000111859.12	NEDD9	chr6:11173684-11382581	1.79281	11.6079	1.055	10.2153	2.68803	3.26322	1.4239	10.9116	2.93354	5.2302620174997e-07	2.02236798009988e-05
ENSG00000165194.10	PCDH19	chrX:99546641-99665271	0.351772	10.511	0.310928	10.1251	4.86205	4.98097	0.33135	10.318	4.93976	5.30238194817191e-07	2.03735601794551e-05
ENSG00000166257.4	SCN3B	chr11:123499894-123525952	0.217839	4.90301	0.292564	0.706871	4.43052	1.24447	0.255201	2.80494	3.43284	5.31151631486071e-07	2.03735601794551e-05
ENSG00000174963.13	ZIC4	chr3:147103832-147228080	0.163418	34.5825	0.256794	23.6286	7.64006	6.46927	0.210106	29.1056	7.08035	5.29205239954415e-07	2.03735601794551e-05
ENSG00000146374.9	RSPO3	chr6:126102306-130463972	0.203474	31.0789	0.379658	15.279	7.18619	5.29414	0.291566	23.179	6.28863	5.6000262972335e-07	2.13223827961332e-05
ENSG00000183873.11	SCN5A	chr3:38589547-38691164	3.04683	0.506236	2.41362	0.245735	-2.56593	-3.24444	2.73022	0.375986	-2.84385	5.60335143001832e-07	2.13223827961332e-05
ENSG00000198795.6	ZNF521	chr18:22641889-22932154	9.42047	57.1405	5.44555	46.3994	2.59937	3.08862	7.43301	51.77	2.79927	5.58932087880294e-07	2.13223827961332e-05
ENSG00000110148.5	CCKBR	chr11:6280965-6293357	7.03505	0.584293	4.3952	0.0785086	-3.56736	-5.63725	5.71513	0.331401	-4.08779	5.77397040087807e-07	2.19136649726201e-05
ENSG00000164684.9	ZNF704	chr8:81540685-81787016	2.51122	10.2913	1.60702	14.9124	2.03063	3.20607	2.05912	12.6018	2.61061	6.11643373880574e-07	2.31523112892057e-05
ENSG00000188483.6	IER5L	chr9:131937834-131972827	0.958252	16.5443	0.323319	7.21681	4.09568	4.43839	0.640786	11.8806	4.20201	6.27813341623564e-07	2.37020134013474e-05
ENSG00000237289.4	CKMT1B	chr15:43825659-44010458	44.3604	6.10203	22.8224	4.85032	-2.85988	-2.23196	33.5914	5.47617	-2.61575	6.38092196027667e-07	2.40270108577538e-05
ENSG00000182670.9	TTC3	chr21:38445525-38575413	13.4694	96.5724	10.2391	81.2066	2.841	2.98628	11.8543	88.8895	2.90608	6.41540483224965e-07	2.40937814900989e-05
ENSG00000145391.7	SETD7	chr4:140417242-140477928	0.982276	7.77339	0.858302	7.59162	2.97159	3.13004	0.920289	7.6825	3.05454	6.49556632525972e-07	2.43313088600354e-05
ENSG00000091409.10	ITGA6	chr2:173292081-173489823	121.022	11.343	111.409	33.4373	-3.41424	-1.73603	116.216	22.3901	-2.37561	6.73924515364567e-07	2.51132907487148e-05
ENSG00000179546.3	HTR1D	chr1:23516992-23521222	4.62333	0.13039	2.88215	0.0967668	-5.04454	-4.75961	3.75274	0.113578	-4.98595	6.72332179483596e-07	2.51132907487148e-05
ENSG00000135842.12	FAM129A	chr1:184759857-184943682	4.7356	0.679947	4.41932	0.427323	-2.78203	-3.34031	4.57746	0.553635	-3.03614	6.85128130228022e-07	2.54648140186043e-05
ENSG00000138646.4	HERC5	chr4:89378267-89427314	7.62111	0.328111	8.73781	0.487505	-4.49632	-4.13614	8.17946	0.407808	-4.30934	7.01047392780393e-07	2.59893445818381e-05
ENSG00000166949.10	SMAD3	chr15:67356100-67487533	2.54253	20.9593	2.97864	18.0723	3.03828	2.59702	2.76058	19.5158	2.81936	7.28785868991233e-07	2.6948215782956e-05
ENSG00000149256.10	TENM4	chr11:78363875-79151992	3.37224	57.7103	1.69878	19.445	4.09303	3.5091	2.53551	38.5776	3.92476	7.36674402809543e-07	2.71700631025961e-05
ENSG00000176945.11	MUC20	chr3:195341817-195467994	0.235036	1.31259	0.0642392	0.981152	2.4323	3.73885	0.149638	1.14687	2.89702	7.73411259240641e-07	2.84520397772823e-05
ENSG00000089820.11	ARHGAP4	chrX:153126968-153200676	10.4866	1.14297	7.47858	1.56247	-3.1865	-2.25166	8.98259	1.35272	-2.72675	7.82370363645455e-07	2.86351534622805e-05
ENSG00000144218.13	AFF3	chr2:100163717-100759201	0.098198	6.25138	0.107541	19.4395	5.85473	7.37043	0.10287	12.8454	6.89639	7.81137469870956e-07	2.86351534622805e-05
ENSG00000171759.4	PAH	chr12:103230662-103354294	5.29951	0	7.02719	0.205185	-9.05244	-5.03135	6.16335	0.102593	-5.84124	7.9570472784242e-07	2.90492812316888e-05
ENSG00000173482.12	PTPRM	chr18:7566779-8406951	1.94871	10.8435	2.14497	14.5056	2.47019	2.75186	2.04684	12.6745	2.62751	8.66361944408753e-07	3.15487347047481e-05
ENSG00000128274.11	A4GALT	chr22:43088126-43117304	3.5129	0.0568876	2.60988	0.151423	-5.71888	-4.02058	3.06139	0.104155	-4.81209	9.13851442974837e-07	3.31940382720961e-05
ENSG00000198598.2	MMP17	chr12:132312937-132336328	10.8501	1.35696	8.63887	0.791269	-2.98999	-3.43215	9.74449	1.07411	-3.17548	9.21375202564414e-07	3.33830249715026e-05
ENSG00000100228.8	RAB36	chr22:23487512-23506537	0.51538	4.75122	0.349596	4.63017	3.1799	3.68972	0.432488	4.69069	3.42402	9.26376017907645e-07	3.33959715327909e-05
ENSG00000112175.6	BMP5	chr6:55618442-55740362	0.0896171	3.49573	0.024995	1.72121	5.13718	5.62849	0.0573061	2.60847	5.39045	9.26325277415032e-07	3.33959715327909e-05
ENSG00000128567.11	PODXL	chr7:131185020-131242976	266.489	9.90532	275.917	57.2428	-4.74833	-2.26887	271.203	33.5741	-3.01377	9.66841856872357e-07	3.476763317313e-05
ENSG00000051523.6	CYBA	chr16:88709690-88717560	156.94	29.4992	96.3374	17.3815	-2.41106	-2.46987	126.639	23.4403	-2.4334	9.81336165156686e-07	3.50261523563617e-05
ENSG00000106571.8	GLI3	chr7:42000547-42277469	8.20034	34.5108	4.61952	49.5892	2.07195	3.42138	6.40993	42.05	2.71277	9.77179001886729e-07	3.50261523563617e-05
ENSG00000162944.5	RFTN2	chr2:198435523-198540769	0.583444	13.6768	0.606426	16.5247	4.52753	4.74543	0.594935	15.1007	4.65415	9.79060744464165e-07	3.50261523563617e-05
ENSG00000009950.11	MLXIPL	chr7:73007523-73038873	3.53389	0.265445	3.1868	0.0835087	-3.6855	-5.09539	3.36034	0.174477	-4.22888	9.96056210753617e-07	3.5463545879901e-05
ENSG00000123104.7	ITPR2	chr12:26272958-26986131	7.42162	1.66129	5.85142	0.951238	-2.15271	-2.60829	6.63652	1.30626	-2.34056	1.03555327494631e-06	3.67787612514265e-05
ENSG00000184307.9	ZDHHC23	chr3:113666747-113807269	5.83353	0.486554	6.48458	0.160086	-3.55682	-5.2549	6.15906	0.32332	-4.23071	1.05311190698323e-06	3.73102504188343e-05
ENSG00000120693.9	SMAD9	chr13:37418967-37494902	0.734564	6.51744	0.48389	4.17905	3.13205	3.08436	0.609227	5.34825	3.12357	1.09386406142164e-06	3.86588222591864e-05
ENSG00000143669.8	LYST	chr1:235824340-236046940	0.783271	2.95611	0.136929	1.18462	1.90269	3.02336	0.4601	2.07036	2.15775	1.11487756448516e-06	3.93048992342024e-05
ENSG00000155380.7	SLC16A1	chr1:113454468-113544813	231.613	34.141	268.771	53.0095	-2.76178	-2.34184	250.192	43.5752	-2.52132	1.18483964256277e-06	4.16692748621585e-05
ENSG00000003137.4	CYP26B1	chr2:72356366-72375167	0.0496386	2.00247	0.0339912	1.76091	5.07658	5.33113	0.0418149	1.88169	5.33275	1.24412698422949e-06	4.36476159540416e-05
ENSG00000157110.11	RBPMS	chr8:30239634-30429778	316.205	56.0567	192.047	32.6367	-2.49569	-2.55653	254.126	44.3467	-2.51851	1.25282706524514e-06	4.38458990425452e-05
ENSG00000103449.7	SALL1	chr16:51169885-51185278	39.5935	2.08322	25.1843	10.6548	-4.24183	-1.24024	32.3889	6.36901	-2.34545	1.25888831103227e-06	4.39510909366217e-05
ENSG00000235597.1	AC013402.2	chr2:105049724-105137290	0.0312218	4.28654	0	1.71204	6.70363	7.42797	0.0156109	2.99929	7.18747	1.35166746470333e-06	4.70759922815803e-05
ENSG00000165655.13	ZNF503	chr10:77029576-77168740	0.324551	13.8057	0.161906	17.7321	5.36794	6.68941	0.243228	15.7689	5.98973	1.36901089228934e-06	4.75648615330673e-05
ENSG00000160606.6	TLCD1	chr17:27046410-27070473	43.9119	3.47014	30.7783	4.91221	-3.65772	-2.645	37.3451	4.19117	-3.15397	1.41798026012181e-06	4.91475374978122e-05
ENSG00000159167.7	STC1	chr8:23699427-23712320	11.4735	1.88094	14.0515	2.28436	-2.60239	-2.61559	12.7625	2.08265	-2.61252	1.42934750647913e-06	4.94224387817205e-05
ENSG00000110237.3	ARHGEF17	chr11:73018279-73080136	3.04174	19.708	2.61719	17.1234	2.69181	2.70522	2.82946	18.4157	2.70018	1.53200501026438e-06	5.28022493097834e-05
ENSG00000150471.10	LPHN3	chr4:62066975-63031272	4.43138	24.1451	3.43546	18.7001	2.44325	2.44105	3.93342	21.4226	2.44378	1.53573970071322e-06	5.28022493097834e-05
ENSG00000184160.6	ADRA2C	chr4:3768074-3770251	6.52895	0.659031	5.95138	0.31715	-3.28891	-4.18762	6.24017	0.48809	-3.66282	1.53810779065623e-06	5.28022493097834e-05
ENSG00000213694.3	S1PR3	chr9:91605777-91619925	2.94648	50.3851	2.44231	47.3056	4.09133	4.2701	2.6944	48.8453	4.17766	1.57728234654487e-06	5.40181649350032e-05
ENSG00000262160.1	RP11-96D1.11	chr16:68021296-68272005	3.84517	0.0831507	4.8219	0.0711676	-5.37109	-5.89554	4.33354	0.0771591	-5.72264	1.59424473386834e-06	5.44693972730693e-05
ENSG00000105939.8	ZC3HAV1	chr7:138728265-138794465	15.0167	1.88959	14.6838	3.68948	-2.98377	-1.98982	14.8502	2.78953	-2.41029	1.64895127087032e-06	5.62050120383854e-05
ENSG00000185924.5	RTN4RL1	chr17:1839298-1928178	0.0720886	3.01415	0.11206	1.02921	5.20321	3.08983	0.0920743	2.02168	4.38389	1.6668619039702e-06	5.66811858787409e-05
ENSG00000152061.17	RABGAP1L	chr1:174084437-174964445	44.1142	9.04791	37.2005	5.56715	-2.28432	-2.73811	40.6573	7.30753	-2.47525	1.6911003603537e-06	5.73697820361499e-05
ENSG00000184344.3	GDF3	chr12:7842377-7848372	8.03409	0.0340097	8.27213	0.590716	-7.51396	-3.78525	8.15311	0.312363	-4.68403	1.69842780788519e-06	5.74827896202836e-05
ENSG00000105737.5	GRIK5	chr19:42502472-42585701	15.2096	3.24646	15.4957	2.34802	-2.22455	-2.71715	15.3527	2.79724	-2.45431	1.70605062516534e-06	5.76052398882118e-05
ENSG00000232445.1	RP11-132A1.4	chr7:100951626-100954266	15.2036	0.422827	11.1679	0.352863	-5.13543	-4.94508	13.1857	0.387845	-5.06942	1.71541811786987e-06	5.77858880736305e-05
ENSG00000171219.8	CDC42BPG	chr11:64590858-64612041	2.5649	0.265226	3.72681	0.945229	-3.22583	-1.96789	3.14586	0.605228	-2.36832	1.73711823391415e-06	5.83801604593952e-05
ENSG00000180011.6	ZADH2	chr18:72907062-72921303	1.33153	10.0644	0.901168	7.54777	2.90874	3.05217	1.11635	8.80608	2.97408	1.76956745131342e-06	5.93320704421732e-05
ENSG00000083290.15	ULK2	chr17:19674141-19771249	2.94073	21.1498	2.01735	23.1349	2.84218	3.51302	2.47904	22.1424	3.15637	1.88314895925304e-06	6.29935223951064e-05
ENSG00000120149.6	MSX2	chr5:174151535-174158144	0.471496	25.1268	0.916752	9.73414	5.70613	3.39428	0.694124	17.4305	4.64033	1.9900123918434e-06	6.64137778289454e-05
ENSG00000071246.5	VASH1	chr14:77228531-77253067	3.26411	19.3908	2.50565	16.0851	2.56694	2.67762	2.88488	17.7379	2.61816	2.11092094392227e-06	7.02858492068934e-05
ENSG00000206052.6	DOK6	chr18:67068290-67629039	0.361198	11.6013	0.17212	1.28333	4.9672	2.82813	0.266659	6.44231	4.56883	2.23298251144162e-06	7.41783382091829e-05
ENSG00000113805.8	CNTN3	chr3:74311718-74570291	0.122862	3.1226	0.19499	1.34375	4.55936	2.72334	0.158926	2.23318	3.77121	2.25431014036266e-06	7.47142789377338e-05
ENSG00000099864.11	PALM	chr19:708952-748329	2.91956	22.6998	1.13121	14.5669	2.95456	3.67505	2.02538	18.6334	3.19845	2.27743473752013e-06	7.53071753206655e-05
ENSG00000176092.8	AIM1L	chr1:26648349-26680621	6.02752	0.173744	5.42775	0.471968	-5.03819	-3.496	5.72763	0.322856	-4.12806	2.34025801848554e-06	7.72070443529724e-05
ENSG00000177108.5	ZDHHC22	chr14:77564439-77725838	13.2205	0.527003	12.677	0.859386	-4.62279	-3.86721	12.9488	0.693194	-4.2136	2.37027007548679e-06	7.80182260087003e-05
ENSG00000233863.1	AC012215.1	chr8:35092974-35654068	11.9945	1.28081	10.6474	1.54509	-3.21723	-2.77679	11.3209	1.41295	-2.99775	2.47710586308165e-06	8.13486089830286e-05
ENSG00000184545.6	DUSP8	chr11:1575273-1620414	0.721197	7.33186	0.478914	0.889253	3.32782	0.879149	0.600055	4.11056	2.76595	2.49084047778148e-06	8.16133244474004e-05
ENSG00000115896.11	PLCL1	chr2:199164086-199637080	0.015808	0.962486	0	0.2033	5.23579	4.41481	0.007904	0.582893	5.50966	2.5170367005075e-06	8.22842179547724e-05
ENSG00000137078.4	SIT1	chr9:35649291-35650937	3.57909	0.0841528	3.39507	0.0766274	-5.25247	-5.29672	3.48708	0.0803901	-5.35387	2.53586158718331e-06	8.2711639614614e-05
ENSG00000119865.4	CNRIP1	chr2:68511302-68547183	0.782967	10.8278	0.843928	7.7784	3.77267	3.18914	0.813447	9.3031	3.50752	2.59470054744497e-06	8.43069045878525e-05
ENSG00000198756.6	GLT25D2	chr1:183898795-184006863	1.58901	10.5367	1.03013	8.40202	2.72154	3.01569	1.30957	9.46936	2.84944	2.59649323779329e-06	8.43069045878525e-05
ENSG00000142632.11	ARHGEF19	chr1:16524348-16539140	15.0515	3.51197	9.06894	2.59882	-2.09641	-1.79912	12.0602	3.05539	-1.97906	2.61060405187926e-06	8.45741636987191e-05
ENSG00000054392.8	HHAT	chr1:210501595-210849638	0.423224	4.93615	0.117581	3.19133	3.51312	4.64918	0.270402	4.06374	3.88497	2.63495611998502e-06	8.49802888561984e-05
ENSG00000183166.5	CALN1	chr7:71244475-71912148	2.35906	0.259709	2.11622	0.208494	-3.13484	-3.28262	2.23764	0.234102	-3.2295	2.63092642510888e-06	8.49802888561984e-05
ENSG00000137166.10	FOXP4	chr6:41462590-41570122	3.6566	16.2595	2.76202	25.123	2.14966	3.18057	3.20931	20.6913	2.68679	2.66124067353646e-06	8.56359862374685e-05
ENSG00000140577.11	CRTC3	chr15:91073156-91260372	1.70009	12.827	1.32895	8.8833	2.90816	2.73162	1.51452	10.8552	2.83736	2.76055169933281e-06	8.86334277750069e-05
ENSG00000070214.10	SLC44A1	chr9:108006902-108201452	38.0232	7.23354	33.1868	7.21166	-2.39249	-2.20064	35.605	7.2226	-2.30069	2.79404536151914e-06	8.9509016659446e-05
ENSG00000189143.8	CLDN4	chr7:73213871-73247014	7.812	0.593509	6.13136	0.351364	-3.69609	-4.08703	6.97168	0.472436	-3.86916	2.82407322203325e-06	9.02699316127251e-05
ENSG00000101746.11	NOL4	chr18:31431063-31804916	0.363376	5.2201	0.417791	3.9005	3.80814	3.19238	0.390583	4.5603	3.52866	2.85553889024874e-06	9.10733290406604e-05
ENSG00000179902.8	C1orf194	chr1:109648572-109749401	0.156536	6.5422	0.0590839	17.7514	5.29807	8.00618	0.10781	12.1468	6.75113	2.8990488598891e-06	9.22564575235504e-05
ENSG00000248605.1	CTD-2306M5.1	chr5:25404841-25446034	8.54545	0	7.91664	0	-9.74069	-9.63056	8.23104	0	-10.6858	3.14164093904883e-06	9.9755768801939e-05
ENSG00000081189.9	MEF2C	chr5:87803362-88762215	0.326469	3.90952	0.214855	2.64666	3.54213	3.56255	0.270662	3.27809	3.57408	3.16643546917068e-06	0.000100322
ENSG00000168004.5	HRASLS5	chr11:63228875-63258666	3.63747	0.0506044	5.03146	0.075674	-5.91133	-5.87884	4.33446	0.0631392	-5.99289	3.20996283159026e-06	0.000101477
ENSG00000189056.9	RELN	chr7:102937868-103629963	0.106736	7.83791	0.0288502	1.22094	6.07099	4.9857	0.0677931	4.52942	5.96097	3.26760130074075e-06	0.000102847
ENSG00000206557.3	TRIM71	chr3:32859509-32933771	31.34	0.913985	23.9112	9.77615	-5.08445	-1.28948	27.6256	5.34507	-2.36864	3.26729371359152e-06	0.000102847
ENSG00000115107.15	STEAP3	chr2:119981383-120023228	8.23594	0.391995	10.6437	0.357888	-4.35843	-4.85594	9.43982	0.374941	-4.63567	3.27667123799989e-06	0.000102908
ENSG00000178773.10	CPNE7	chr16:89642175-89663654	5.45159	0.173228	7.92061	0.494405	-4.89761	-3.97478	6.6861	0.333816	-4.30367	3.29509970821709e-06	0.000103261
ENSG00000086967.9	MYBPC2	chr19:50936159-50969578	4.47982	0.132043	2.74998	0.0119836	-4.98226	-6.97209	3.6149	0.0720133	-5.5547	3.35187307134819e-06	0.000104812
ENSG00000196352.9	CD55	chr1:207494852-207534311	18.2187	4.02185	21.3069	1.05442	-2.1767	-4.32386	19.7628	2.53813	-2.95847	3.5537958810206e-06	0.000110885
ENSG00000100626.11	GALNTL1	chr14:69649736-69821183	2.73948	14.7419	1.49415	16.1827	2.42367	3.42832	2.11681	15.4623	2.86585	3.61809687645e-06	0.000112403
ENSG00000159314.7	ARHGAP27	chr17:43471274-43511787	2.26781	0.357325	2.34656	0.203082	-2.63252	-3.4672	2.30719	0.280203	-3.01919	3.61108717058519e-06	0.000112403
ENSG00000087903.8	RFX2	chr19:5978413-6199583	2.94079	9.35789	1.89294	16.6466	1.66662	3.12979	2.41687	13.0022	2.42513	3.70342892274809e-06	0.000114314
ENSG00000141431.5	ASXL3	chr18:31158578-31331156	0.178294	4.70348	0.0362722	11.479	4.64574	7.95589	0.107283	8.09124	6.17204	3.70076674039216e-06	0.000114314
ENSG00000235471.1	AL033532.1	chr1:168048780-168106821	2.15093	15.7046	1.50202	15.0575	2.86238	3.31689	1.82647	15.381	3.07054	3.70142801187918e-06	0.000114314
ENSG00000105281.8	SLC1A5	chr19:47222767-47291851	170.341	27.5744	177.055	55.8379	-2.62658	-1.6647	173.698	41.7062	-2.05812	3.96300921038317e-06	0.000121285
ENSG00000129654.7	FOXJ1	chr17:74132413-74236454	0.903456	5.30746	0.560192	6.76956	2.54133	3.57168	0.731824	6.03851	3.03599	3.94961962273344e-06	0.000121285
ENSG00000158089.10	GALNT14	chr2:31133332-31378068	3.90962	0.311517	2.62757	0.209638	-3.60775	-3.58601	3.26859	0.260578	-3.62367	3.95138851846692e-06	0.000121285
ENSG00000184838.10	PRR16	chr5:119799972-120023027	0.130908	6.64497	0.388105	4.96469	5.56161	3.64338	0.259506	5.80483	4.45712	3.95966178850664e-06	0.000121285
ENSG00000150347.10	ARID5B	chr10:63661058-63856703	0.210002	14.6404	0.158416	6.71744	6.05728	5.31996	0.184209	10.6789	5.81932	4.07004337354177e-06	0.000124296
ENSG00000151640.7	DPYSL4	chr10:134000403-134019266	8.76869	34.1672	3.30248	34.8712	1.96096	3.39646	6.03558	34.5192	2.51485	4.123380204648e-06	0.000125658
ENSG00000167281.13	RBFOX3	chr17:77085426-77613550	16.6279	0.296541	14.456	0.239704	-5.76225	-5.85631	15.5419	0.268122	-5.83094	4.2021845989509e-06	0.000127789
ENSG00000104112.4	SCG3	chr15:51973549-52013223	31.1909	4.68352	23.9499	2.30145	-2.73285	-3.37375	27.5704	3.49248	-2.97899	4.27370698471502e-06	0.00012969
ENSG00000179750.11	APOBEC3B	chr22:39378351-39394214	12.3133	1.46191	11.2372	0.930242	-3.06563	-3.58039	11.7752	1.19608	-3.29397	4.29768738449217e-06	0.000130143
ENSG00000213889.6	PPM1N	chr19:45988546-46005768	7.11773	0.379678	6.25787	0.287616	-4.19309	-4.39645	6.6878	0.333647	-4.30476	4.42757014421906e-06	0.000133794
ENSG00000154096.9	THY1	chr11:119252487-119397374	273.294	76.0466	194.02	29.1738	-1.84536	-2.73304	233.657	52.6102	-2.15087	4.52086548716742e-06	0.000136327
ENSG00000185386.10	MAPK11	chr22:50702141-50709196	0.311985	5.04564	0.175217	1.96968	3.97283	3.41797	0.243601	3.50766	3.82066	4.54560928010385e-06	0.000136787
ENSG00000170921.10	TANC2	chr17:61086916-61509572	1.51868	19.7824	1.62281	15.6326	3.69459	3.26005	1.57075	17.7075	3.49066	4.6566083946895e-06	0.000139834
ENSG00000100031.14	GGT1	chr22:24936405-25024972	8.32537	0.653915	4.43015	0.443909	-3.65018	-3.29014	6.37776	0.548912	-3.52645	4.67327173071244e-06	0.000140042
ENSG00000160216.14	AGPAT3	chr21:45285066-45406417	1.27258	15.838	1.65983	8.20089	3.62717	2.29784	1.4662	12.0194	3.0309	4.72099680636125e-06	0.000141178
ENSG00000221968.4	FADS3	chr11:61640990-61659523	20.4191	3.59322	13.5418	2.60516	-2.50327	-2.37351	16.9805	3.09919	-2.45201	4.78526258928085e-06	0.000142803
ENSG00000129159.6	KCNC1	chr11:17756358-17804602	0.134124	1.18018	0.0740438	3.06313	3.0458	5.19242	0.104084	2.12166	4.28508	4.85016318227404e-06	0.00014444
ENSG00000003249.8	DBNDD1	chr16:90071272-90114181	29.1785	6.8135	19.8665	3.46493	-2.09681	-2.51601	24.5225	5.13922	-2.25338	5.13308136149737e-06	0.00015255
ENSG00000170340.10	B3GNT2	chr2:62423247-62451866	18.4729	3.67294	20.8894	3.04108	-2.32726	-2.77607	19.6811	3.35701	-2.54979	5.19984802572803e-06	0.000154216
ENSG00000170396.6	ZNF804A	chr2:185463092-185804219	0	5.00959	0	0.606858	8.97143	5.94687	0	2.80822	9.13608	5.44685729826242e-06	0.000161209
ENSG00000173930.8	SLCO4C1	chr5:101569689-101632253	2.59237	0.306185	3.32982	0.19816	-3.04098	-4.00401	2.96109	0.252173	-3.52776	5.46587568417805e-06	0.00016144
ENSG00000185565.6	LSAMP	chr3:115528640-117716439	1.84091	13.1601	1.93858	14.3624	2.83096	2.88281	1.88975	13.7613	2.86106	5.50490474570214e-06	0.000162259
ENSG00000205929.5	C21orf62	chr21:34144410-34266043	0	3.52125	0.0218554	0.628547	8.46404	4.32518	0.0109277	2.0749	7.02883	5.5641814119013e-06	0.000163671
ENSG00000147402.7	GABRQ	chrX:151806636-151825999	3.61351	0.406453	2.92585	0.387891	-3.12116	-2.88334	3.26968	0.397172	-3.02547	5.59608663939395e-06	0.000164274
ENSG00000070729.9	CNGB1	chr16:57917502-58005020	0.00985243	1.7161	0.00409856	0.248678	6.44206	4.19754	0.00697549	0.982389	6.36546	5.64489938750947e-06	0.000165369
ENSG00000173673.7	HES3	chr1:6304251-6305638	42.0967	0.0533354	27.3538	8.84667	-9.37683	-1.62743	34.7253	4.45	-2.96269	5.75203280551391e-06	0.000168165
ENSG00000152582.8	SPEF2	chr5:35617945-35827120	0.35164	4.15176	0.139553	3.42379	3.52457	4.52108	0.245596	3.78777	3.91982	5.76550084345533e-06	0.000168217
ENSG00000164076.12	CAMKV	chr3:49895420-49907655	31.403	5.12138	22.0055	6.45433	-2.61394	-1.76795	26.7043	5.78786	-2.20499	6.01510881003494e-06	0.000175144
ENSG00000087495.12	PHACTR3	chr20:58152563-58422766	0.224093	6.0152	0.0533248	1.97747	4.68586	4.97202	0.138709	3.99634	4.79926	6.0937384575183e-06	0.000177075
ENSG00000141384.7	TAF4B	chr18:23805899-23971649	5.70363	0.588449	4.56588	0.647765	-3.2551	-2.79841	5.13476	0.618107	-3.04415	6.28735346202054e-06	0.000182333
ENSG00000143674.6	MLK4	chr1:233463513-233520894	8.23748	1.59594	6.65212	0.719089	-2.36053	-3.19181	7.4448	1.15751	-2.67995	6.39864614056222e-06	0.000185187
ENSG00000120156.15	TEK	chr9:27109138-27230173	8.68558	1.51386	8.09605	1.09623	-2.51255	-2.87334	8.39081	1.30505	-2.68005	6.52455313596769e-06	0.000188074
ENSG00000162344.3	FGF19	chr11:69512999-69519410	5.28617	0.499002	3.77695	0.388938	-3.37921	-3.24681	4.53156	0.44397	-3.33691	6.51653226797619e-06	0.000188074
ENSG00000176973.7	FAM89B	chr11:65337900-65341669	5.82583	35.8578	3.40592	27.9958	2.61968	3.03538	4.61587	31.9268	2.78876	6.69901985169999e-06	0.000192717
ENSG00000230623.2	RP11-469A15.2	chr1:200443047-200447421	10.6298	0	7.10791	0	-10.0553	-9.47531	8.86885	0	-10.7934	6.98195748353558e-06	0.000200456
ENSG00000144406.12	UNC80	chr2:210636716-210864024	0.194547	1.66992	0.0978171	1.69773	3.03789	3.98542	0.146182	1.68383	3.48166	7.18338015457944e-06	0.000205828
ENSG00000111679.11	PTPN6	chr12:7055630-7070479	6.49185	0.582759	5.67277	0.330384	-3.45533	-4.06136	6.08231	0.456572	-3.72118	7.21640534826423e-06	0.000206363
ENSG00000049130.8	KITLG	chr12:88885884-88974628	2.11161	43.6887	3.22467	16.1718	4.36436	2.32268	2.66814	29.9303	3.48524	7.83889219801258e-06	0.000223719
ENSG00000203326.5	ZNF525	chr19:53868945-53930574	10.8737	2.72928	10.458	1.92262	-1.9903	-2.43735	10.6658	2.32595	-2.19469	8.03999932077471e-06	0.000229005
ENSG00000129194.3	SOX15	chr17:7465191-7536700	6.23183	0.531207	9.76612	0.576067	-3.52772	-4.06013	7.99898	0.553637	-3.84073	8.09103639910283e-06	0.000230003
ENSG00000144063.3	MALL	chr2:110841446-110874143	5.70293	0.237841	3.36157	0.238368	-4.52674	-3.76287	4.53225	0.238104	-4.22217	8.18754849278745e-06	0.000232287
ENSG00000176834.9	VSIG10	chr12:118501397-118583389	20.7324	5.15083	20.0189	4.16788	-2.00691	-2.26124	20.3757	4.65935	-2.12745	9.23687134433094e-06	0.000261542
ENSG00000092421.12	SEMA6A	chr5:115779311-115927094	95.2437	25.6392	95.1009	24.4841	-1.89286	-1.95718	95.1723	25.0617	-1.92485	9.40768267153128e-06	0.000265855
ENSG00000168614.12	NBPF9	chr1:144811743-144830302	2.02145	15.1749	1.85454	14.7529	2.90206	2.98509	1.938	14.9639	2.94561	9.54519464006699e-06	0.000269212
ENSG00000068615.11	REEP1	chr2:86441115-86565206	0.858031	7.09004	0.621248	2.45908	3.03201	1.9677	0.73964	4.77456	2.68226	9.7594099775424e-06	0.000274178
ENSG00000162433.10	AK4	chr1:65613231-65697828	28.2	4.64517	19.1962	5.61055	-2.5993	-1.77279	23.6981	5.12786	-2.20724	9.75264254807886e-06	0.000274178
ENSG00000168003.12	SLC3A2	chr11:62623517-62656352	124.348	37.6558	113.458	26.9242	-1.72317	-2.07477	118.903	32.29	-1.88046	9.95137028070996e-06	0.000279026
ENSG00000068831.14	RASGRP2	chr11:64494382-64512928	7.01491	0.784312	6.3434	0.372727	-3.1447	-4.05314	6.67915	0.578519	-3.51789	1.02860480711799e-05	0.000286179
ENSG00000106012.12	IQCE	chr7:2598631-2654368	1.2183	7.39727	0.977892	5.61777	2.59228	2.51014	1.0981	6.50752	2.56166	1.02710770695392e-05	0.000286179
ENSG00000138768.9	USO1	chr4:76649761-76735382	123.309	31.7177	108.998	23.9818	-1.95858	-2.18382	116.154	27.8498	-2.0601	1.02374718791464e-05	0.000286179
ENSG00000180448.6	HMHA1	chr19:1065921-1095598	8.99107	1.76492	6.24061	2.09352	-2.34234	-1.57119	7.61584	1.92922	-1.9782	1.02706359629083e-05	0.000286179
ENSG00000008323.11	PLEKHG6	chr12:6419601-6437672	4.05789	0.340818	3.68357	0.654453	-3.53549	-2.47477	3.87073	0.497636	-2.94688	1.08516520593342e-05	0.000300979
ENSG00000124233.10	SEMG1	chr20:43835637-43838413	3.0969	0	5.1508	0.0768687	-8.27933	-5.89262	4.12385	0.0384343	-6.57076	1.08598354654917e-05	0.000300979
ENSG00000142675.12	CNKSR1	chr1:26503893-26516377	5.59062	0.826216	5.11764	0.882455	-2.74364	-2.52244	5.35413	0.854335	-2.64071	1.10910887421379e-05	0.000306797
ENSG00000225968.4	ELFN1	chr7:1727754-1787590	0.888554	5.95528	0.639634	4.76853	2.73091	2.87887	0.764094	5.36191	2.80286	1.11132130797479e-05	0.000306819
ENSG00000141682.11	PMAIP1	chr18:57567179-57571538	71.7163	15.2793	66.6771	11.9647	-2.22998	-2.47742	69.1967	13.622	-2.34434	1.13107636890313e-05	0.000311674
ENSG00000155367.10	PPM1J	chr1:113243727-113258099	5.81473	0.431185	7.05376	0.63457	-3.72274	-3.45403	6.43424	0.532878	-3.58154	1.14014568726005e-05	0.000312974
ENSG00000237923.1	XXbac-BPG27H4.8	chr6:30807302-30815936	4.50689	0.05258	7.27205	0	-6.17348	-9.5082	5.88947	0.02629	-7.55752	1.13832412906881e-05	0.000312974
ENSG00000160685.9	ZBTB7B	chr1:154975126-155006257	8.07876	1.51481	5.76588	1.34099	-2.40729	-2.09602	6.92232	1.4279	-2.27336	1.14745237537361e-05	0.00031438
ENSG00000174607.6	UGT8	chr4:115519610-115599380	18.879	1.81733	20.7753	0.787487	-3.36974	-4.70396	19.8272	1.30241	-3.92306	1.16653425419477e-05	0.000319001
ENSG00000184347.10	SLIT3	chr5:168081517-168728133	0.257486	8.91275	0.217627	7.02668	5.05995	4.95015	0.237557	7.96972	5.03904	1.17374621952882e-05	0.000320364
ENSG00000198947.9	DMD	chrX:31115793-33357558	4.6748	25.9949	2.54361	19.8112	2.47272	2.95643	3.60921	22.9031	2.6641	1.2162853831259e-05	0.000331346
ENSG00000131409.8	LRRC4B	chr19:51020148-51071302	4.71413	24.0061	3.3003	21.833	2.34588	2.72214	4.00722	22.9196	2.51442	1.2226465065391e-05	0.000332449
ENSG00000224078.4	SNHG14	chr15:25068793-25684128	190.784	51.7797	172.462	31.9241	-1.88128	-2.43319	181.623	41.8519	-2.11745	1.23433065274528e-05	0.000334993
ENSG00000185483.7	ROR1	chr1:64239692-64647181	53.2074	16.1731	43.5359	6.85199	-1.71741	-2.66583	48.3717	11.5125	-2.07048	1.25395178489655e-05	0.000339677
ENSG00000131459.8	GFPT2	chr5:179727689-179780387	29.019	6.6777	26.1431	4.68993	-2.11791	-2.47627	27.581	5.68382	-2.27774	1.29914980926541e-05	0.000351259
ENSG00000148444.10	COMMD3	chr10:22604902-22620413	5.00389	41.8716	2.83732	21.4965	3.06232	2.9171	3.92061	31.684	3.013	1.33184874720504e-05	0.000359424
ENSG00000011347.5	SYT7	chr11:61282784-61348620	5.51754	1.13747	4.18807	0.715464	-2.26818	-2.53275	4.85281	0.926467	-2.38273	1.35577188075361e-05	0.000365195
ENSG00000100604.7	CHGA	chr14:93389424-93401638	14.9988	5.12601	15.2013	0.949153	-1.54709	-3.98724	15.1	3.03758	-2.31166	1.35836666583657e-05	0.00036521
ENSG00000105289.10	TJP3	chr19:3708106-3750811	17.5914	3.89548	17.4586	0.838579	-2.17212	-4.36357	17.525	2.36703	-2.88563	1.37227056216882e-05	0.00036826
ENSG00000179344.11	HLA-DQB1	chr6:32627243-32636160	5.85852	0.231163	4.18578	0.00806568	-4.60492	-7.85954	5.02215	0.119614	-5.3342	1.40061615135659e-05	0.000375167
ENSG00000267260.1	CTD-2162K18.4	chr19:37264054-37267980	8.2826	0.739632	6.95653	1.04785	-3.46757	-2.71931	7.61956	0.893741	-3.08468	1.40801335583692e-05	0.000376447
ENSG00000106479.6	ZNF862	chr7:149535455-149564568	0.682213	6.51325	0.404738	3.92854	3.2363	3.24739	0.543476	5.2209	3.25218	1.43675157016203e-05	0.000383418
ENSG00000084453.12	SLCO1A2	chr12:21417533-21572528	3.44066	0.231005	3.9717	0.264812	-3.83974	-3.85687	3.70618	0.247908	-3.87519	1.44148168357341e-05	0.000383968
ENSG00000154188.5	ANGPT1	chr8:108261720-108510283	0.364945	5.58029	0.459778	7.05532	3.89817	3.9107	0.412362	6.3178	3.9212	1.45875320941669e-05	0.00038785
ENSG00000118194.14	TNNT2	chr1:201328135-201368736	5.22558	0.355837	8.47619	0.467837	-3.83908	-4.15053	6.85088	0.411837	-4.03979	1.47500367551307e-05	0.000391447
ENSG00000243452.2	NBPF15	chr1:148555978-148596267	1.59072	13.9122	1.75596	16.657	3.12059	3.23847	1.67334	15.2846	3.18744	1.55317055528994e-05	0.000411433
ENSG00000095203.9	EPB41L4B	chr9:111934254-112083244	9.581	1.26415	11.195	1.82568	-2.91214	-2.60975	10.388	1.54492	-2.74535	1.6048380188651e-05	0.000424338
ENSG00000164362.14	TERT	chr5:1253261-1295184	5.01431	0.186851	3.4836	0.844458	-4.67375	-2.03163	4.24896	0.515655	-3.03041	1.62906737374612e-05	0.000429954
ENSG00000105499.9	PLA2G4C	chr19:48551099-48614074	9.31367	0.53961	4.83981	0.523751	-4.08442	-3.18369	7.07674	0.531681	-3.72197	1.65183817960787e-05	0.000435166
ENSG00000123213.17	NLN	chr5:64885506-65167553	74.422	17.8535	59.2156	13.9415	-2.05891	-2.0858	66.8188	15.8975	-2.07111	1.69373490457223e-05	0.00044526
ENSG00000172379.14	ARNT2	chr15:80696691-80890278	3.58162	13.8904	3.40948	21.9795	1.95242	2.68497	3.49555	17.935	2.35752	1.69634833119883e-05	0.00044526
ENSG00000203827.7	NBPF16	chr1:148739442-148758311	3.54581	22.5106	2.72019	16.8815	2.663	2.62922	3.133	19.696	2.65036	1.71012477324405e-05	0.000448059
ENSG00000101850.8	GPR143	chrX:9693385-9754337	13.2366	1.55031	8.34566	1.14155	-3.08572	-2.85917	10.7911	1.34593	-2.99849	1.72716921439312e-05	0.000450909
ENSG00000164116.12	GUCY1A3	chr4:156587862-156653501	0.0322756	2.90587	0.021992	1.23516	6.10796	5.28248	0.0271338	2.07052	6.01323	1.73040650408614e-05	0.000450909
ENSG00000197822.6	OCLN	chr5:68773298-69006341	24.1609	3.50946	25.7656	3.0559	-2.77985	-3.07162	24.9633	3.28268	-2.92495	1.72747691990935e-05	0.000450909
ENSG00000116729.9	WLS	chr1:68167148-68698803	1.97231	142.045	3.71725	91.3626	6.16312	4.61558	2.84478	116.704	5.35592	1.77931458188052e-05	0.000462417
ENSG00000137962.8	ARHGAP29	chr1:94614543-94740624	1.14663	5.3336	0.943028	9.30321	2.20788	3.28869	1.04483	7.31841	2.80236	1.78099853355982e-05	0.000462417
ENSG00000164916.8	FOXK1	chr7:4683387-4811074	1.26479	5.63437	0.615114	4.93586	2.14655	2.98403	0.939952	5.28511	2.48499	1.80714100707621e-05	0.000468359
ENSG00000164683.11	HEY1	chr8:80676244-80680098	0.871904	8.56269	0.459929	3.80621	3.28105	3.02163	0.665917	6.18445	3.20561	1.87560903314687e-05	0.00048523
ENSG00000129757.8	CDKN1C	chr11:2904442-2907111	5.46811	38.7037	4.69695	25.1687	2.82109	2.41934	5.08253	31.9362	2.65038	1.98444042263943e-05	0.000512463
ENSG00000184232.3	OAF	chr11:120081474-120101001	0.295967	9.67143	0.450553	9.28544	4.98377	4.33508	0.37326	9.47844	4.64796	2.03410464840866e-05	0.000523409
ENSG00000203930.4	RP1-177G6.2	chrX:139791931-139854839	0.352142	7.21153	1.28864	5.79339	4.31768	2.15989	0.820391	6.50246	2.97894	2.03278014245788e-05	0.000523409
ENSG00000121207.7	LRAT	chr4:155548096-155674270	19.3193	1.23167	27.1533	1.17308	-3.96044	-4.52104	23.2363	1.20237	-4.26675	2.04401911754573e-05	0.000525021
ENSG00000170390.10	DCLK2	chr4:150999425-151178609	0.20537	9.75027	0.410955	17.6523	5.50203	5.39086	0.308163	13.7013	5.45178	2.11359796505156e-05	0.000541925
ENSG00000146938.10	NLGN4X	chrX:5758677-6146904	39.2635	8.77474	37.3456	10.3848	-2.16049	-1.84546	38.3045	9.57977	-1.99889	2.13110061720991e-05	0.00054544
ENSG00000165102.10	HGSNAT	chr8:42995555-43057998	2.25485	21.3619	2.84325	10.639	3.23823	1.90004	2.54905	16.0005	2.6477	2.25667172086551e-05	0.000576554
ENSG00000046604.8	DSG2	chr18:29078005-29136874	69.1911	9.62838	81.3715	4.42805	-2.84393	-4.1967	75.2813	7.02821	-3.42013	2.28464647981645e-05	0.000582666
ENSG00000109610.5	SOD3	chr4:24791533-24802464	2.82882	0.225052	3.68473	0.579425	-3.59424	-2.64809	3.25678	0.402238	-3.00171	2.29996275802022e-05	0.000585534
ENSG00000261534.1	RP11-244O19.1	chr9:124577952-124581731	0.0301016	1.096	0.0488809	0.898593	4.78555	3.94776	0.0394912	0.997297	4.49364	2.32011032793065e-05	0.00058962
ENSG00000178394.3	HTR1A	chr5:63253719-63276870	2.83268	0.170953	3.50224	0.0181042	-3.97356	-6.96546	3.16746	0.0945286	-4.99435	2.4014496733904e-05	0.000609214
ENSG00000163435.11	ELF3	chr1:201951499-201986316	3.15843	0.129437	4.03341	0.289695	-4.50608	-3.754	3.59592	0.209566	-4.06887	2.47935536381445e-05	0.000627871
ENSG00000132274.11	TRIM22	chr11:5684424-5959849	19.5928	4.84651	20.4786	1.20892	-2.01307	-4.07115	20.0357	3.02772	-2.72425	2.50447016047205e-05	0.000633116
ENSG00000058085.10	LAMC2	chr1:183155372-183214035	2.66985	0.761319	3.24641	0.0539446	-1.79675	-5.67032	2.95813	0.407632	-2.8442	2.53820634535573e-05	0.000637165
ENSG00000082397.11	EPB41L3	chr18:5392382-5630699	5.24625	30.6866	5.57625	35.4831	2.54597	2.66759	5.41125	33.0849	2.61102	2.5288025060602e-05	0.000637165
ENSG00000106066.9	CPVL	chr7:29034846-29553944	27.1752	4.75115	22.819	4.78813	-2.51344	-2.25032	24.9971	4.76964	-2.38859	2.5380830316988e-05	0.000637165
ENSG00000165566.11	FAM123A	chr13:25735821-25746426	0.0167804	3.46936	0.0599866	7.56532	7.0215	6.75809	0.0383835	5.51734	6.99199	2.53102686471265e-05	0.000637165
ENSG00000004139.9	SARM1	chr17:26684603-26734215	1.43959	7.46221	1.40715	6.8493	2.36589	2.27507	1.42337	7.15576	2.32574	2.561272817043e-05	0.000639706
ENSG00000109472.9	CPE	chr4:166282345-166419472	12.7336	67.0288	8.41511	45.9836	2.39522	2.44867	10.5744	56.5062	2.41729	2.56167078753627e-05	0.000639706
ENSG00000131389.12	SLC6A6	chr3:14444075-14583588	42.2709	8.74959	32.0697	8.93622	-2.27107	-1.84231	37.1703	8.84291	-2.07094	2.55456546859005e-05	0.000639706
ENSG00000175395.10	ZNF25	chr10:38238499-38265561	1.07343	6.70201	0.969687	7.57295	2.63114	2.95237	1.02156	7.13748	2.79861	2.62790138840796e-05	0.000655108
ENSG00000082482.9	KCNK2	chr1:215179117-215410436	0.404441	10.9167	0.141017	4.60701	4.72055	4.93418	0.272729	7.76186	4.80558	2.65983292641955e-05	0.000661921
ENSG00000113448.12	PDE4D	chr5:58264864-59843484	0.419848	13.6782	0.473153	1.89543	4.99296	1.97956	0.4465	7.78681	4.10916	2.67263063241837e-05	0.000663957
ENSG00000132749.6	MTL5	chr11:68474907-68519032	15.2417	1.47534	12.2916	2.83794	-3.3601	-2.11085	13.7667	2.15664	-2.6715	2.75106736400092e-05	0.000682265
ENSG00000006047.8	YBX2	chr17:7184985-7197934	11.8951	1.01737	6.98651	0.869083	-3.53455	-2.99256	9.4408	0.943227	-3.31637	2.77350912975359e-05	0.000686646
ENSG00000096696.9	DSP	chr6:7541807-7586950	21.1063	6.15858	18.642	3.85771	-1.77535	-2.26978	19.8742	5.00814	-1.98747	2.79514748413836e-05	0.000690814
ENSG00000103490.13	PYCARD	chr16:31212805-31214773	9.71166	1.28465	10.4928	0.501912	-2.90864	-4.35874	10.1022	0.893281	-3.49208	2.80389738610304e-05	0.000691788
ENSG00000061918.8	GUCY1B3	chr4:156680143-156728743	1.57795	7.84531	0.69056	10.0767	2.3065	3.84781	1.13426	8.96101	2.97637	2.85591670004579e-05	0.000703416
ENSG00000171227.6	TMEM37	chr2:120187476-120196096	7.75756	0.915788	6.54805	0.517715	-3.06871	-3.63544	7.1528	0.716751	-3.30994	2.88364759567092e-05	0.000709032
ENSG00000112539.9	C6orf118	chr6:165693152-165723096	0.347496	2.61678	0.32255	6.77992	2.8773	4.35175	0.335023	4.69835	3.78998	2.9035562991775e-05	0.000712709
ENSG00000121904.12	CSMD2	chr1:33979608-34631443	4.28614	0.961695	3.59717	0.751505	-2.14446	-2.24394	3.94165	0.8566	-2.19554	2.94050522228347e-05	0.000720549
ENSG00000101115.8	SALL4	chr20:50400580-50419059	41.9181	3.80364	35.2543	15.9626	-3.45868	-1.14261	38.5862	9.88312	-1.9645	2.95098898205472e-05	0.000721615
ENSG00000152208.7	GRID2	chr4:93225549-94695707	5.43074	1.39176	5.97056	0.537688	-1.95657	-3.44886	5.70065	0.964724	-2.55675	2.9548901529933e-05	0.000721615
ENSG00000120875.4	DUSP4	chr8:29190580-29208185	6.19752	22.476	1.56573	19.8046	1.85694	3.65248	3.88163	21.1403	2.44375	2.96176158327366e-05	0.000722067
ENSG00000140284.6	SLC27A2	chr15:50150434-50528592	5.60128	0.391901	6.71894	0.249695	-3.80342	-4.69549	6.16011	0.320798	-4.24208	3.00654056493329e-05	0.000731744
ENSG00000159251.6	ACTC1	chr15:35047284-35105124	12.59	4.22598	12.2644	0.96728	-1.57266	-3.65074	12.4272	2.59663	-2.25659	3.011753188986e-05	0.000731775
ENSG00000213214.3	ARHGEF35	chr7:143883175-144077725	7.36368	1.1662	4.30666	0.157256	-2.64825	-4.68979	5.83517	0.661728	-3.13084	3.06049901684728e-05	0.000742365
ENSG00000164434.7	FABP7	chr6:123100619-123105219	15.6223	135.812	11.0379	114.659	3.11912	3.37564	13.3301	125.236	3.2314	3.09082645966819e-05	0.000748459
ENSG00000198087.7	CD2AP	chr6:47445524-47594999	25.1236	6.92903	22.2675	4.51508	-1.85681	-2.29957	23.6955	5.72206	-2.04906	3.11760468904633e-05	0.000753674
ENSG00000163093.7	BBS5	chr2:170335687-170382772	0.202776	3.30761	0.342773	2.29164	3.96273	2.70585	0.272775	2.79962	3.33582	3.12800451523242e-05	0.00075492
ENSG00000137309.14	HMGA1	chr6:34204576-34214008	722.186	71.4619	533.882	262.695	-3.33694	-1.02311	628.034	167.078	-1.91029	3.18744835672638e-05	0.000767978
ENSG00000078725.7	DBC1	chr9:121915735-122131745	6.64871	1.96949	6.59066	0.877996	-1.75012	-2.89399	6.61969	1.42374	-2.21311	3.38101987520196e-05	0.000813254
ENSG00000174718.7	KIAA1551	chr12:32112303-32146039	63.6562	16.71	66.2711	16.2369	-1.92895	-2.02843	64.9637	16.4734	-1.97916	3.38798350469866e-05	0.000813569
ENSG00000106804.6	C5	chr9:123714615-123812554	0.435143	4.69686	0.662298	5.26998	3.40242	2.97336	0.548721	4.98342	3.17135	3.40441209358201e-05	0.000816024
ENSG00000115758.8	ODC1	chr2:10580093-10588630	42.4989	162.865	20.2953	169.343	1.93793	3.0601	31.3971	166.104	2.4032	3.40955344289082e-05	0.000816024
ENSG00000145743.10	FBXL17	chr5:107194735-107717799	1.32572	5.98875	0.854664	6.63897	2.16704	2.94292	1.09019	6.31386	2.52848	3.46722740010401e-05	0.000828448
ENSG00000163075.8	PCDP1	chr2:120302007-120419827	0.245245	4.51876	0.222749	7.71999	4.14916	5.05362	0.233997	6.11937	4.6795	3.47633921677285e-05	0.000829248
ENSG00000100242.11	SUN2	chr22:39101727-39190203	5.44708	30.1102	7.55169	16.5225	2.46453	1.12852	6.49939	23.3163	1.84217	3.48547019427763e-05	0.00083005
ENSG00000112378.10	PERP	chr6:138411922-138428648	45.2992	2.35503	58.9207	2.84203	-4.25987	-4.36896	52.1099	2.59853	-4.32316	3.57525394526298e-05	0.000850024
ENSG00000101871.9	MID1	chrX:10413349-10851773	10.4499	45.2043	8.68622	54.4936	2.11191	2.64789	9.56806	49.849	2.38066	3.599890052986e-05	0.000854469
ENSG00000187867.4	PALM3	chr19:14164176-14169971	11.4415	2.53316	10.0319	1.95923	-2.17084	-2.35033	10.7367	2.2462	-2.25446	3.63432420986265e-05	0.000861221
ENSG00000111846.11	GCNT2	chr6:10492455-10629601	20.5376	2.59318	20.1845	3.23687	-2.98063	-2.63684	20.361	2.91502	-2.80211	3.6452085841456e-05	0.00086238
ENSG00000158856.12	EPB49	chr8:21906505-21940038	0.079293	5.129	0.0875381	1.01011	5.8468	3.38662	0.0834156	3.06955	5.11993	3.6576172237389e-05	0.000863894
ENSG00000156050.4	FAM161B	chr14:74318546-74551196	0.119288	2.28575	0.189415	0.973931	4.15031	2.30278	0.154352	1.62984	3.35887	3.7041249916309e-05	0.000873445
ENSG00000162909.13	CAPN2	chr1:223889294-223963720	13.9713	66.3213	7.02994	47.7658	2.24619	2.76264	10.5006	57.0435	2.44103	3.81667120072379e-05	0.000898511
ENSG00000142920.12	ADC	chr1:33546704-33586131	0.31924	3.05418	0.111851	1.96141	3.21829	4.01604	0.215546	2.5078	3.51014	3.85099077866443e-05	0.000905109
ENSG00000148200.11	NR6A1	chr9:127279887-127535206	57.2033	1.02854	27.4585	9.72903	-5.78372	-1.49593	42.3309	5.37878	-2.97519	3.88189738114049e-05	0.000910884
ENSG00000197261.7	C6orf141	chr6:49518112-49529620	17.7359	2.18898	15.2033	2.04287	-3.01258	-2.88962	16.4696	2.11592	-2.95748	3.8898352362294e-05	0.00091126
ENSG00000041515.10	MYO16	chr13:109248499-109860355	0.0796508	1.43484	0.0152087	1.28295	4.01045	5.6806	0.0474297	1.35889	4.7012	4.04015204399831e-05	0.000944936
ENSG00000113100.5	CDH9	chr5:26880708-27121257	4.46038	0.407356	2.06659	0.0279616	-3.42105	-5.77353	3.26349	0.217659	-3.87572	4.0875718765985e-05	0.000954475
ENSG00000102349.10	KLF8	chrX:56258853-56314322	4.00931	0.72399	2.70555	0.255651	-2.45311	-3.35364	3.35743	0.48982	-2.76453	4.19662096942115e-05	0.00097835
ENSG00000185414.14	MRPL30	chr2:99613723-100016728	19.1595	4.35961	11.6655	2.03099	-2.13324	-2.51614	15.4125	3.1953	-2.26829	4.22318038452149e-05	0.000982949
ENSG00000110693.11	SOX6	chr11:15987994-16778649	0.0887592	4.6628	0.0212568	3.29553	5.56423	6.72457	0.055008	3.97917	6.05298	4.26276199992575e-05	0.000990558
ENSG00000221955.6	SLC12A8	chr3:124801479-125094198	5.90309	1.06634	6.7529	0.840428	-2.45778	-2.99138	6.32799	0.953384	-2.72421	4.32804745000925e-05	0.00100411
ENSG00000102760.12	RGCC	chr13:42031694-42045018	0	2.37229	0	8.9344	7.89621	9.80484	0	5.65334	10.1442	4.39267202171647e-05	0.00101746
ENSG00000128052.8	KDR	chr4:55919226-55991756	15.5715	0.694913	24.3186	0.557489	-4.46624	-5.42192	19.9451	0.626201	-4.98215	4.48696721289551e-05	0.00103596
ENSG00000182287.9	AP1S2	chrX:15843928-15873054	154.375	38.6236	125.375	33.4448	-1.9986	-1.90608	139.875	36.0342	-1.95655	4.48423850971731e-05	0.00103596
ENSG00000063180.4	CA11	chr19:49141198-49184461	154.392	25.9898	56.428	15.7025	-2.57012	-1.84475	105.41	20.8462	-2.33788	4.53770177604983e-05	0.001046
ENSG00000126803.8	HSPA2	chr14:64854748-65009955	17.2748	2.46501	12.2596	4.20264	-2.804	-1.54229	14.7672	3.33383	-2.14547	4.56670465267878e-05	0.001051
ENSG00000196189.7	SEMA4A	chr1:156117156-156147543	5.92299	2.3531	8.66103	0.767143	-1.32808	-3.47995	7.29201	1.56012	-2.22103	4.63546477621762e-05	0.00106512
ENSG00000108947.4	EFNB3	chr17:7608519-7614696	7.39029	27.3697	6.40361	48.7365	1.88745	2.92609	6.89695	38.0531	2.46313	4.68270971453131e-05	0.00107426
ENSG00000173334.3	TRIB1	chr8:126442562-126450647	16.0274	3.94564	15.1354	3.46403	-2.01946	-2.12419	15.5814	3.70484	-2.07086	4.7116245151634e-05	0.00107872
ENSG00000263053.2	RP11-1055B8.6	chr17:79369274-79433357	0.621485	7.90652	0.110337	5.68224	3.64805	5.56384	0.365911	6.79438	4.19626	4.71717112802763e-05	0.00107872
ENSG00000181541.4	MAB21L2	chr4:151185593-151936879	0.150425	101.431	0.0611889	26.0953	9.30453	8.51848	0.105807	63.7631	9.16864	4.76628309895567e-05	0.00108823
ENSG00000156860.10	FBRS	chr16:30669751-30682131	4.98277	22.781	3.19939	18.6909	2.19055	2.54274	4.09108	20.7359	2.34017	4.79559297144438e-05	0.00109318
ENSG00000136732.10	GYPC	chr2:127413508-127454246	11.2918	43.2699	5.71966	45.959	1.93714	3.00414	8.50573	44.6145	2.39032	4.94479942527797e-05	0.00112517
ENSG00000170684.4	ZNF296	chr19:45574757-45808541	3.2795	0.4055	3.80713	0.496441	-2.98495	-2.91402	3.54331	0.450971	-2.96012	4.95155823414197e-05	0.00112517
ENSG00000119125.12	GDA	chr9:74729510-74872109	4.93326	0.266824	2.06134	0.011725	-4.15842	-6.57506	3.4973	0.139274	-4.60141	4.98257547483406e-05	0.00113043
ENSG00000112812.11	PRSS16	chr6:27215479-27224403	8.06146	0.105352	4.83739	0.701104	-6.12872	-2.76908	6.44942	0.403228	-3.98284	4.99142894359134e-05	0.00113066
ENSG00000112320.7	SOBP	chr6:107811161-107981357	1.88117	9.47431	1.5086	7.28695	2.32626	2.26455	1.69488	8.38063	2.30248	5.05835202809857e-05	0.00114154
ENSG00000118922.12	KLF12	chr13:74260225-74708394	4.50619	18.2226	2.43113	17.4881	2.01334	2.84158	3.46866	17.8554	2.36223	5.05687952569476e-05	0.00114154
ENSG00000226137.3	BAIAP2-AS1	chr17:79002932-79008501	1.70656	8.04846	1.15946	8.39652	2.23098	2.84567	1.43301	8.22249	2.51638	5.06330135248114e-05	0.00114154
ENSG00000132932.11	ATP8A2	chr13:25946208-26599989	4.15519	1.44764	11.7314	0.394884	-1.51475	-4.85795	7.9433	0.921262	-3.10115	5.15778379527116e-05	0.00116103
ENSG00000006606.4	CCL26	chr7:75398850-75419214	6.35138	0	8.75963	0	-9.31319	-9.77637	7.55551	0	-10.5623	5.16623101497565e-05	0.00116111
ENSG00000065621.8	GSTO2	chr10:106028630-106059616	14.2886	1.11288	9.02079	0.709951	-3.6706	-3.64888	11.6547	0.911416	-3.66938	5.19437891112589e-05	0.00116559
ENSG00000166922.4	SCG5	chr15:32933876-32989299	36.7515	9.41304	20.1816	4.86343	-1.96393	-2.05075	28.4665	7.13823	-1.99487	5.20239083779059e-05	0.00116559
ENSG00000148814.13	LRRC27	chr10:134145613-134195010	0.927133	6.45442	0.81436	7.03245	2.78619	3.09473	0.870746	6.74343	2.94597	5.21207860319655e-05	0.00116595
ENSG00000128298.12	BAIAP2L2	chr22:38480895-38506677	3.08422	0.191648	1.87049	0.150154	-3.93966	-3.55358	2.47736	0.170901	-3.81887	5.25014304157808e-05	0.00117264
ENSG00000102575.6	ACP5	chr19:11670188-11729950	4.17642	0.188764	2.70536	0.18517	-4.39659	-3.79834	3.44089	0.186967	-4.16595	5.28204220152272e-05	0.00117794
ENSG00000155111.10	CDK19	chr6:110931180-111137161	3.04973	16.6996	3.44077	13.7044	2.4492	1.9907	3.24525	15.202	2.22611	5.30142864909915e-05	0.00118043
ENSG00000103260.3	METRN	chr16:691812-818865	6.42736	19.0896	2.89697	38.2409	1.569	3.7179	4.66216	28.6653	2.61894	5.37295088033838e-05	0.00119451
ENSG00000254339.1	RP11-267L5.1	chr8:115294295-115308068	21.8061	0.0465243	43.4889	0	-8.59231	-12.0868	32.6475	0.0232621	-10.1741	5.46106327899226e-05	0.00121222
ENSG00000129355.6	CDKN2D	chr19:10677137-10679735	0.723819	7.44566	0.473817	4.05145	3.34484	3.06946	0.598818	5.74855	3.25227	5.50955555844067e-05	0.0012211
ENSG00000182118.5	FAM89A	chr1:231154703-231175992	1.21861	6.99087	0.534223	13.2293	2.51051	4.60449	0.876416	10.1101	3.52054	5.5707634899882e-05	0.00123277
ENSG00000067113.12	PPAP2A	chr5:54603587-54830878	29.8154	10.5588	37.6675	5.88913	-1.49673	-2.67513	33.7415	8.22396	-2.03595	5.66818294939107e-05	0.0012524
ENSG00000164604.7	GPR85	chr7:112720467-112727833	0.208477	5.29654	0.161316	0.665454	4.60222	1.9792	0.184896	2.981	3.97493	5.70873909410931e-05	0.00125942
ENSG00000188211.4	NCR3LG1	chr11:17373272-17398888	0.395448	2.59992	0.515017	4.92757	2.68642	3.23337	0.455232	3.76375	3.03365	5.74158726116282e-05	0.00126473
ENSG00000148123.9	LPPR1	chr9:103790990-104087417	1.23802	8.0107	0.712885	3.71538	2.68409	2.36555	0.975452	5.86304	2.58136	5.76052146615508e-05	0.00126696
ENSG00000166394.10	CYB5R2	chr11:7686330-7698453	33.2373	7.06301	22.9019	3.34145	-2.23284	-2.77324	28.0696	5.20223	-2.43068	5.82551670708157e-05	0.0012793
ENSG00000106780.7	MEGF9	chr9:123363090-123476748	0.802271	6.26429	0.572132	12.2746	2.94942	4.39936	0.687202	9.26944	3.744	5.83788610298711e-05	0.00128006
ENSG00000120756.8	PLS1	chr3:142315228-142432506	21.3671	4.09331	16.1164	2.90589	-2.38121	-2.46741	18.7417	3.4996	-2.41932	5.93796908474871e-05	0.00130003
ENSG00000183091.14	NEB	chr2:152266396-152591001	2.52722	0.837032	2.67905	0.641419	-1.58276	-2.04544	2.60313	0.739225	-1.80921	5.95723667353486e-05	0.00130226
ENSG00000116117.13	PARD3B	chr2:205410515-206484886	0.717819	3.10182	0.710344	6.09907	2.09611	3.0842	0.714082	4.60045	2.67911	6.03208493026228e-05	0.00131662
ENSG00000151693.5	ASAP2	chr2:9346893-9563676	5.39317	22.086	3.15891	21.3028	2.03191	2.74966	4.27604	21.6944	2.34162	6.07726353814839e-05	0.00132448
ENSG00000156395.8	SORCS3	chr10:106400858-107024993	0.122024	1.49475	0.0867617	0.551658	3.51065	2.53718	0.104393	1.0232	3.23254	6.09242969973432e-05	0.00132577
ENSG00000103647.8	CORO2B	chr15:68871307-69020145	1.60416	12.1045	1.95794	6.86781	2.90788	1.80526	1.78105	9.48616	2.40981	6.11162421970635e-05	0.00132794
ENSG00000137103.11	TMEM8B	chr9:35812956-35854844	3.37821	24.7615	1.81005	22.833	2.87009	3.64971	2.59413	23.7972	3.195	6.12515424676592e-05	0.00132887
ENSG00000068976.9	PYGM	chr11:64513860-64527769	3.26096	0.688031	3.23675	0.367288	-2.22835	-3.10526	3.24885	0.527659	-2.61086	6.16913629218527e-05	0.0013364
ENSG00000183496.5	MEX3B	chr15:82334118-82338482	4.84044	20.5736	2.51794	17.0785	2.08531	2.75699	3.67919	18.826	2.35369	6.18701609846015e-05	0.00133826
ENSG00000124145.5	SDC4	chr20:43953927-43977064	24.8367	5.76992	29.6052	7.08788	-2.10393	-2.06088	27.221	6.4289	-2.08122	6.20929864570077e-05	0.00134106
ENSG00000160200.13	CBS	chr21:44473300-44497053	208.038	41.5959	144.168	52.4616	-2.32206	-1.45824	176.103	47.0288	-1.90469	6.2573497336933e-05	0.00134941
ENSG00000174938.10	SEZ6L2	chr16:29882479-29910868	18.0775	6.0347	14.7986	2.51193	-1.58125	-2.55383	16.4381	4.27332	-1.94236	6.29418796951024e-05	0.00135532
ENSG00000229743.2	AC018730.3	chr2:105469742-105542510	0	2.73074	0	7.10687	8.09842	9.4751	0	4.9188	9.94363	6.59363483294171e-05	0.00141768
ENSG00000076554.10	TPD52	chr8:80830951-81143467	25.3824	0.510205	19.9838	2.52252	-5.60918	-2.98091	22.6831	1.51636	-3.8985	6.61142342418624e-05	0.00141938
ENSG00000169783.8	LINGO1	chr15:77905368-78113242	39.1619	6.20234	27.2108	6.38217	-2.65661	-2.09033	33.1864	6.29226	-2.39801	6.62236481178125e-05	0.00141961
ENSG00000185274.7	WBSCR17	chr7:70597154-71178585	14.8221	3.09465	11.7192	3.00944	-2.25622	-1.95775	13.2706	3.05205	-2.11857	6.6379004034418e-05	0.00142083
ENSG00000196275.9	GTF2IRD2	chr7:74071993-74306731	0.342374	4.24073	0.764474	3.82575	3.59253	2.30822	0.553424	4.03324	2.85429	6.69139497926854e-05	0.00143015
ENSG00000135905.13	DOCK10	chr2:225629806-225907162	0.18651	4.73266	0.33386	7.36813	4.59302	4.42336	0.260185	6.05039	4.51315	6.75224557730799e-05	0.00144101
ENSG00000162630.5	B3GALT2	chr1:193091146-193223031	0.0450524	11.8927	0.0590102	2.76247	7.75627	5.32822	0.0520313	7.32759	7.00642	6.7946216856408e-05	0.00144791
ENSG00000123570.3	RAB9B	chrX:103077251-103087158	0.0680542	2.85221	0.253448	1.98927	5.19651	2.92388	0.160751	2.42074	3.87133	6.94156567560023e-05	0.00147703
ENSG00000258498.1	DIO3OS	chr14:102018557-102026768	0.151841	0.624706	0.0374201	2.56835	1.97151	5.76481	0.0946306	1.59653	4.00672	7.05165663042988e-05	0.00149824
ENSG00000104447.6	TRPS1	chr8:116420723-116821899	1.27383	6.80698	0.946011	4.75719	2.40868	2.31804	1.10992	5.78209	2.3759	7.08155768538806e-05	0.00150238
ENSG00000102181.15	CD99L2	chrX:149934809-150067289	3.72575	20.6535	2.52425	16.1654	2.46762	2.67417	3.125	18.4094	2.5566	7.11303037972635e-05	0.00150683
ENSG00000154118.8	JPH3	chr16:87635440-87799598	7.98868	1.42472	4.59053	0.72807	-2.47899	-2.63997	6.2896	1.07639	-2.54122	7.26342018402973e-05	0.00153643
ENSG00000137819.9	PAQR5	chr15:69591285-69740764	4.06837	0.654452	3.00686	0.181459	-2.61776	-3.97794	3.53761	0.417956	-3.06624	7.28051706490873e-05	0.00153778
ENSG00000122756.10	CNTFR	chr9:34551429-34590121	0.940112	11.5727	0.511346	62.2358	3.60773	6.89959	0.725729	36.9042	5.6585	7.42586232183734e-05	0.00156618
ENSG00000135423.8	GLS2	chr12:56843285-56882198	5.81741	1.09592	4.49178	0.881797	-2.39761	-2.33571	5.1546	0.988859	-2.37615	7.61746899749571e-05	0.00160408
ENSG00000163145.8	C1QTNF7	chr4:15004297-15447790	0	3.52232	0	2.41091	8.46447	7.91941	0	2.96662	9.2151	7.62787149480457e-05	0.00160408
ENSG00000161681.10	SHANK1	chr19:51124563-51222707	1.26807	8.34095	1.28206	4.24725	2.70797	1.72025	1.27507	6.2941	2.29893	7.64206530846293e-05	0.00160472
ENSG00000141837.13	CACNA1A	chr19:13317255-13734804	5.19272	0.718246	4.16682	1.06494	-2.83677	-1.95815	4.67977	0.891593	-2.38545	7.67029601832247e-05	0.0016083
ENSG00000197594.7	ENPP1	chr6:132129155-132216295	9.44328	1.06903	11.8137	1.30484	-3.13109	-3.16872	10.6285	1.18694	-3.15724	7.84970399126445e-05	0.00164352
ENSG00000139835.8	GRTP1	chr13:113978543-114018446	19.9215	3.48181	17.8485	4.43197	-2.513	-2.00734	18.885	3.95689	-2.25336	7.93752805722107e-05	0.00165709
ENSG00000243056.1	EIF4EBP3	chr5:139781398-139929163	3.67449	0.0594689	4.94661	0.0517393	-5.72895	-6.32702	4.31055	0.0556041	-6.15399	7.93446347137274e-05	0.00165709
ENSG00000122691.8	TWIST1	chr7:19060613-19157295	0.301509	72.3335	0.0362755	33.5101	7.85945	9.50056	0.168892	52.9218	8.24966	7.96886282273242e-05	0.00166122
ENSG00000181722.11	ZBTB20	chr3:114056940-114866118	0.0206366	2.5305	0.208736	1.33651	6.37371	2.62196	0.114686	1.93351	4.01761	8.08137734752244e-05	0.00168224
ENSG00000125266.5	EFNB2	chr13:107142092-107187462	12.7294	43.5545	4.12744	84.9771	1.77386	4.36043	8.42842	64.2658	2.92997	8.28000358287448e-05	0.00172109
ENSG00000166831.4	RBPMS2	chr15:65032090-65067786	103.851	15.2531	70.0572	31.8866	-2.76653	-1.13534	86.9541	23.5699	-1.88309	8.30926959031697e-05	0.00172468
ENSG00000073849.10	ST6GAL1	chr3:186648273-186796341	53.2393	13.9954	49.5881	15.8859	-1.92678	-1.64163	51.4137	14.9406	-1.78257	8.37803389839952e-05	0.00172898
ENSG00000105996.5	HOXA2	chr7:27132611-27142430	0	10.7557	0	37.4659	10.0722	11.8717	0	24.1108	12.2358	8.36687037536666e-05	0.00172898
ENSG00000146966.8	DENND2A	chr7:140218219-140422590	2.63506	13.2651	2.24598	11.9822	2.32735	2.41027	2.44052	12.6237	2.36849	8.37251207467233e-05	0.00172898
ENSG00000198853.7	RUSC2	chr9:35490123-35563896	1.2934	8.25561	1.01212	3.26713	2.66484	1.68087	1.15276	5.76137	2.31633	8.37765067430824e-05	0.00172898
ENSG00000064309.10	CDON	chr11:125820010-125933230	8.23639	35.259	8.95373	70.0545	2.09657	2.96651	8.59506	52.6568	2.61434	8.41788866409006e-05	0.00173471
ENSG00000165698.11	C9orf9	chr9:135600964-135765588	0.669641	4.09251	0.426708	2.68718	2.59366	2.62671	0.548175	3.38985	2.61754	8.46244598662422e-05	0.00174019
ENSG00000165863.12	C10orf82	chr10:118423206-118502085	7.74603	1.46319	7.28664	0.395523	-2.39638	-4.16938	7.51633	0.929357	-3.00894	8.46868835429907e-05	0.00174019
ENSG00000186297.7	GABRA5	chr15:26788692-27194354	6.80633	1.62766	6.15192	0.933696	-2.05736	-2.70698	6.47912	1.28068	-2.33438	8.49567349179665e-05	0.00174325
ENSG00000003989.12	SLC7A2	chr8:17354596-17428082	11.2757	1.09999	13.257	1.91098	-3.34588	-2.78793	12.2663	1.50548	-3.02221	8.52905081375942e-05	0.0017476
ENSG00000158296.9	SLC13A3	chr20:45186462-45304714	5.7115	0.916634	4.89184	0.911015	-2.62633	-2.41202	5.30167	0.913825	-2.52995	8.54830394104016e-05	0.00174906
ENSG00000139915.13	MDGA2	chr14:47308825-48144157	0.0654972	2.72507	0.347652	2.3578	5.17901	2.72692	0.206575	2.54143	3.58924	8.72462083174283e-05	0.0017826
ENSG00000122012.9	SV2C	chr5:75377770-75649764	0.0871678	0.687197	0.0313357	0.457405	2.84302	3.49921	0.0592518	0.572301	3.16752	8.87363735854395e-05	0.00181047
ENSG00000067798.9	NAV3	chr12:78224684-78606790	0.303813	5.22771	0.532555	0.829688	4.06096	0.630089	0.418184	3.0287	2.84172	8.92097674565122e-05	0.00181755
ENSG00000185885.11	IFITM1	chr11:307630-315272	128.449	7.73799	65.3459	6.2732	-4.05134	-3.37875	96.8975	7.00559	-3.78892	8.9784791041105e-05	0.00182668
ENSG00000160190.8	SLC37A1	chr21:43892595-44001550	7.82827	2.78449	7.81377	0.6674	-1.48795	-3.52978	7.82102	1.72594	-2.17672	9.1267284155001e-05	0.00185422
ENSG00000174099.6	MSRB3	chr12:65672422-66036152	0.446067	26.2107	0.453087	14.2489	5.84532	4.94444	0.449577	20.2298	5.47617	9.18888064352827e-05	0.00186422
ENSG00000085276.13	MECOM	chr3:168801286-169381406	0.360649	13.898	0.164789	5.68849	5.22972	5.02689	0.262719	9.79324	5.19373	9.2542903787071e-05	0.0018722
ENSG00000180660.6	MAB21L1	chr13:35516423-36247159	0.0466552	13.244	0.0121922	5.63369	7.87	7.99044	0.0294237	9.43885	8.09983	9.24352999984646e-05	0.0018722
ENSG00000158813.13	EDA	chrX:68835910-69259319	3.38686	0.319182	2.74635	0.64344	-3.36724	-2.07663	3.06661	0.481311	-2.65904	9.28375162164548e-05	0.00187553
ENSG00000077684.11	PHF17	chr4:129730778-130034487	51.4691	12.778	48.688	18.8438	-2.0092	-1.36901	50.0785	15.8109	-1.66296	0.000100933	0.00203622
ENSG00000130707.12	ASS1	chr9:133320093-133376661	59.6661	8.53652	34.4391	3.2909	-2.80375	-3.38354	47.0526	5.91371	-2.99107	0.000103417	0.0020834
ENSG00000213347.6	MXD3	chr5:176728198-176739758	3.91536	41.905	2.68031	23.0512	3.41657	3.09962	3.29784	32.4781	3.29791	0.000105015	0.00211264
ENSG00000084764.6	MAPRE3	chr2:27070614-27250064	3.49159	20.8009	2.01868	8.10743	2.57126	2.00048	2.75514	14.4542	2.38917	0.000105335	0.00211611
ENSG00000137100.10	DCTN3	chr9:34613547-34620515	18.4193	88.9653	8.56507	60.6493	2.2714	2.82251	13.4922	74.8073	2.47062	0.000105726	0.00212101
ENSG00000065609.9	SNAP91	chr6:84262598-84419410	0.163839	4.35954	0.397561	1.68389	4.65166	2.05525	0.2807	3.02171	3.40518	0.000106492	0.00213339
ENSG00000148175.8	STOM	chr9:124101354-124132531	34.8262	5.02503	47.8609	2.00071	-2.79052	-4.57337	41.3436	3.51287	-3.55506	0.000106952	0.00213963
ENSG00000163661.3	PTX3	chr3:156893011-157251408	1.32944	52.5414	0.881321	107.912	5.29403	6.91983	1.10538	80.2267	6.17505	0.000107483	0.00214728
ENSG00000121900.12	TMEM54	chr1:33351594-33367039	6.14341	0.562879	4.35929	0.171755	-3.42508	-4.58733	5.25135	0.367317	-3.81946	0.000107862	0.00215186
ENSG00000137449.11	CPEB2	chr4:15004297-15447790	0.293887	5.6351	0.499084	1.10062	4.21539	1.12539	0.396486	3.36786	3.07055	0.000108496	0.0021615
ENSG00000266964.1	FXYD1	chr19:35615416-35645204	10.0001	0.787312	6.23897	0.125544	-3.65017	-5.52679	8.11953	0.456428	-4.13811	0.000109814	0.00218474
ENSG00000131620.13	ANO1	chr11:69924407-70035634	3.83061	0.545632	3.52915	0.236593	-2.78913	-3.8432	3.67988	0.391112	-3.21764	0.000110231	0.00219
ENSG00000063015.14	SEZ6	chr17:27232267-27384234	6.51274	1.39307	4.24183	0.984339	-2.21689	-2.09628	5.37729	1.1887	-2.17277	0.000110787	0.00219197
ENSG00000102271.9	KLHL4	chrX:86772751-86925050	5.53868	0.480159	4.56893	1.30232	-3.50082	-1.80289	5.05381	0.891239	-2.49684	0.000110707	0.00219197
ENSG00000109323.4	MANBA	chr4:103552659-103682151	17.0729	5.31996	16.1515	4.25598	-1.68035	-1.92161	16.6122	4.78797	-1.79369	0.00011076	0.00219197
ENSG00000101347.7	SAMHD1	chr20:35504533-35580246	16.0801	5.24706	10.7752	2.19705	-1.61385	-2.28886	13.4276	3.72206	-1.84964	0.000111676	0.00220652
ENSG00000146151.8	HMGCLL1	chr6:55299166-55444012	0.0879082	3.42608	0.0296348	1.06983	5.13319	4.76789	0.0587715	2.24796	5.14276	0.000111842	0.00220677
ENSG00000163293.7	NIPAL1	chr4:47849256-48042188	3.5203	0.740466	3.35571	0.216549	-2.23393	-3.89302	3.43801	0.478507	-2.83206	0.000112595	0.00221858
ENSG00000134709.6	HOOK1	chr1:60280457-60342050	39.7359	4.77118	14.2865	2.48377	-3.05536	-2.51926	27.0112	3.62748	-2.8948	0.000113196	0.00222738
ENSG00000197971.10	MBP	chr18:74686645-74845639	4.02289	0.446469	2.95974	0.831251	-3.14322	-1.81973	3.49132	0.63886	-2.44102	0.000113628	0.00223281
ENSG00000165197.4	FIGF	chrX:15363712-15402498	0.0360502	5.5056	0.0436195	10.8791	6.90417	7.66591	0.0398348	8.19235	7.51439	0.000115404	0.00226462
ENSG00000177425.6	PAWR	chr12:79968758-80334448	76.7758	21.4128	50.1125	15.9785	-1.84169	-1.64843	63.4442	18.6957	-1.76251	0.000116283	0.00227876
ENSG00000206503.7	HLA-A	chr6:29909036-29913661	35.2098	9.78761	35.1459	8.84207	-1.84588	-1.98968	35.1778	9.31484	-1.9165	0.000117956	0.00230841
ENSG00000141524.11	TMC6	chr17:76000248-76139049	11.0246	2.92196	12.682	2.18194	-1.9121	-2.53364	11.8533	2.55195	-2.2134	0.000119521	0.00233585
ENSG00000196935.4	SRGAP1	chr12:64238072-64541637	1.7919	5.66422	1.10726	10.4985	1.6549	3.23352	1.44958	8.08136	2.47489	0.000120119	0.00234435
ENSG00000149972.6	CNTN5	chr11:98891682-100229616	0	1.19226	0	0.220927	6.90961	4.52936	0	0.706594	7.15298	0.000120796	0.00235438
ENSG00000100767.11	PAPLN	chr14:73704204-73741348	5.65208	0.241562	6.3588	2.46715	-4.49234	-1.36234	6.00544	1.35436	-2.14455	0.000123086	0.00239576
ENSG00000081479.8	LRP2	chr2:169983618-170219195	1.10877	7.56566	0.975586	16.1679	2.75946	4.0369	1.04218	11.8668	3.50296	0.000123431	0.002396
ENSG00000221866.5	PLXNA4	chr7:131808090-132333447	0.165319	1.59475	0.2021	0.405986	3.19429	0.971788	0.183709	1.00037	2.41348	0.000123305	0.002396
ENSG00000136811.9	ODF2	chr9:131217465-131263239	9.93705	41.3398	8.0903	46.7187	2.05554	2.52826	9.01367	44.0292	2.28764	0.000123744	0.00239884
ENSG00000075399.8	VPS9D1	chr16:89773541-89883065	1.98657	9.77486	1.13345	5.25991	2.29303	2.20438	1.56001	7.51738	2.26502	0.000124113	0.00240275
ENSG00000240184.2	PCDHGC3	chr5:140710251-140892546	2.50781	10.258	2.29969	13.4829	2.02791	2.54643	2.40375	11.8704	2.30163	0.00012433	0.0024037
ENSG00000170571.6	EMB	chr5:49692025-49739082	40.7854	11.9989	32.7653	8.53332	-1.7643	-1.93974	36.7754	10.2661	-1.84034	0.000124993	0.00241328
ENSG00000124507.5	PACSIN1	chr6:34433915-34503006	2.8357	1.18905	2.01076	0.243287	-1.24689	-2.99606	2.42323	0.716168	-1.7515	0.000125695	0.0024236
ENSG00000110881.6	ASIC1	chr12:50451330-50477394	1.27955	5.10076	1.10705	7.80246	1.98667	2.80608	1.1933	6.45161	2.42979	0.000127038	0.0024462
ENSG00000176641.6	RNF152	chr18:59475295-59561480	1.07649	8.26138	0.585531	4.17479	2.92845	2.81291	0.83101	6.21809	2.89604	0.000127859	0.00245872
ENSG00000180530.5	NRIP1	chr21:16333555-16437321	2.55424	17.2384	1.80564	31.5582	2.74986	4.11992	2.17994	24.3983	3.48141	0.000128986	0.00247708
ENSG00000168078.5	PBK	chr8:27590834-27695612	17.8986	75.6251	7.77403	61.1486	2.0784	2.97397	12.8363	68.3869	2.41303	0.000129488	0.0024834
ENSG00000187244.5	BCAM	chr19:45312327-45324673	38.9944	7.42005	33.6823	6.18442	-2.39219	-2.44338	36.3383	6.80223	-2.41655	0.000131959	0.00252743
ENSG00000176485.6	PLA2G16	chr11:63340666-63389143	24.8748	0.381044	35.6115	1.32077	-5.99179	-4.74242	30.2431	0.850907	-5.14325	0.000135805	0.00259764
ENSG00000158220.9	ESYT3	chr3:138153427-138200528	2.63105	0.458457	3.34052	0.415253	-2.49513	-2.978	2.98578	0.436855	-2.75888	0.000136141	0.0026006
ENSG00000171246.5	NPTX1	chr17:78440947-78451643	5.2806	0.512153	3.68976	0.968695	-3.34089	-1.9185	4.48518	0.740424	-2.59064	0.000136663	0.0026071
ENSG00000213722.4	DDAH2	chr6:31694814-31707540	24.2057	111.316	12.8571	92.8825	2.20078	2.85187	18.5314	102.099	2.46161	0.00013697	0.00260951
ENSG00000144152.8	FBLN7	chr2:112895961-112945791	0.566837	6.23939	0.32888	11.7009	3.43748	5.11094	0.447859	8.97015	4.3088	0.000137455	0.00261528
ENSG00000157214.8	STEAP2	chr7:89511666-89870091	10.6766	1.2213	12.6183	0.437366	-3.11755	-4.81906	11.6474	0.829333	-3.80387	0.000138336	0.00262857
ENSG00000230699.2	RP11-54O7.1	chr1:846814-850351	0.212344	2.03005	0.116449	1.04508	3.19774	3.06073	0.164397	1.53757	3.18686	0.000138802	0.00263395
ENSG00000178718.5	RPP25	chr15:75246756-75313837	6.27964	0.680923	4.41889	1.22589	-3.18638	-1.84139	5.34926	0.953406	-2.48198	0.000139103	0.00263617
ENSG00000164300.11	SERINC5	chr5:79407049-79551898	20.9751	6.3847	19.4833	2.84716	-1.71442	-2.77033	20.2292	4.61593	-2.13054	0.000140178	0.00265306
ENSG00000164181.9	ELOVL7	chr5:60047617-60140216	3.13532	0.295289	3.6117	0.148147	-3.36496	-4.51733	3.37351	0.221718	-3.89742	0.000140368	0.00265315
ENSG00000050030.8	KIAA2022	chrX:73952683-74145320	0.118766	1.2522	0.12609	0.681763	3.29312	2.34572	0.122428	0.966981	2.93125	0.000142131	0.00267944
ENSG00000135248.10	FAM71F1	chr7:128349114-128371677	8.03913	0.112541	2.80752	0	-6.0375	-8.13828	5.42333	0.0562705	-6.46917	0.000142053	0.00267944
ENSG00000162670.7	FAM5C	chr1:190066791-190446759	0	3.01379	0.027242	0.248107	8.24021	2.79297	0.013621	1.63095	6.45705	0.000146371	0.00275576
ENSG00000143499.9	SMYD2	chr1:214454444-214510474	1.87	11.485	1.91383	16.5383	2.6122	3.10463	1.89192	14.0116	2.88541	0.000147535	0.00277403
ENSG00000134463.10	ECHDC3	chr10:11784364-11806069	11.6836	1.5286	6.71606	0.864039	-2.92603	-2.94399	9.19983	1.19632	-2.93777	0.000149188	0.00280146
ENSG00000225792.1	AC004540.4	chr7:26331540-26416321	0.553461	8.56486	0.210552	4.92252	3.92773	4.48313	0.382006	6.74369	4.12418	0.000150334	0.00281931
ENSG00000092850.7	TEKT2	chr1:36549675-36553876	0.74083	5.015	0.364352	4.82464	2.74256	3.69094	0.552591	4.91982	3.14279	0.000150721	0.00282289
ENSG00000006283.13	CACNA1G	chr17:48633567-48709301	1.00478	12.8395	1.16479	4.96581	3.66248	2.08253	1.08479	8.90265	3.031	0.000154787	0.00289527
ENSG00000115507.5	OTX1	chr2:63277191-63284971	3.09738	8.81591	0.862964	12.83	1.50605	3.87858	1.98017	10.823	2.44742	0.000156836	0.00292979
ENSG00000105538.4	RASIP1	chr19:49223843-49243978	4.87971	1.0214	4.04258	0.122001	-2.24514	-4.94022	4.46115	0.571701	-2.95314	0.000157183	0.00293245
ENSG00000172020.8	GAP43	chr3:115342170-115440337	5.87722	64.3017	4.24877	13.2988	3.44943	1.64387	5.063	38.8002	2.93676	0.000157457	0.00293376
ENSG00000213023.5	SYT3	chr19:51124563-51222707	4.73733	1.50282	3.88899	0.771269	-1.64987	-2.31921	4.31316	1.13704	-1.9188	0.00015946	0.00296724
ENSG00000007516.9	BAIAP3	chr16:1383601-1401912	1.52636	4.90757	0.606925	6.25717	1.67843	3.34464	1.06664	5.58237	2.38235	0.000160798	0.00298827
ENSG00000141570.6	CBX8	chr17:77765930-77776326	0.342247	2.31671	0.308354	3.49322	2.72363	3.45998	0.3253	2.90496	3.13915	0.000164088	0.00304415
ENSG00000167720.7	SRR	chr17:1963132-2284352	7.6474	34.6476	5.27054	31.8511	2.17825	2.59304	6.45897	33.2493	2.36305	0.000164228	0.00304415
ENSG00000101493.6	ZNF516	chr18:74069643-74207146	3.1509	11.6238	1.72337	11.8159	1.87991	2.7703	2.43714	11.7198	2.26335	0.000166745	0.00308601
ENSG00000104689.5	TNFRSF10A	chr8:23046791-23088439	3.78398	0.288394	4.72563	1.12525	-3.66842	-2.06055	4.25481	0.706822	-2.5812	0.000166916	0.00308601
ENSG00000138771.10	SHROOM3	chr4:77356252-77723117	4.77517	26.2234	3.58474	29.6689	2.45476	3.04548	4.17995	27.9462	2.73962	0.000167578	0.00309031
ENSG00000150625.12	GPM6A	chr4:176554084-176923815	2.67212	62.4813	2.39915	50.7854	4.54221	4.3981	2.53564	56.6334	4.47852	0.000167471	0.00309031
ENSG00000177606.5	JUN	chr1:59246464-59249785	1.81655	37.0507	2.85082	15.4427	4.3427	2.43336	2.33369	26.2467	3.48864	0.00016887	0.00311015
ENSG00000160471.6	COX6B2	chr19:55860673-55874620	62.5015	0.331358	2.75986	0.0819089	-7.51669	-4.91346	32.6307	0.206633	-7.26874	0.000169937	0.00312579
ENSG00000197724.6	PHF2	chr9:96338688-96441869	2.9104	12.8447	2.51516	10.9824	2.13806	2.12206	2.71278	11.9136	2.13271	0.00017047	0.00313159
ENSG00000242715.3	CCDC169	chr13:36742344-36871979	12.543	1.37638	14.1847	1.16688	-3.17864	-3.59231	13.3638	1.27163	-3.38846	0.000172788	0.00317013
ENSG00000187017.10	ESPN	chr1:6484847-6580121	5.00618	0.166998	3.03037	0.162205	-4.82478	-4.14205	4.01828	0.164602	-4.56815	0.000175678	0.00321905
ENSG00000118508.4	RAB32	chr6:146864828-146876101	0.794844	8.25863	0.883492	13.9061	3.36087	3.96116	0.839168	11.0824	3.71524	0.000175937	0.0032197
ENSG00000168386.14	FILIP1L	chr3:99536677-99897447	0.0546065	19.5324	0.0904652	5.0188	8.24071	5.64545	0.0725358	12.2756	7.3073	0.000180008	0.00329001
ENSG00000015153.10	YAF2	chr12:42550905-42632151	1.6547	16.4726	1.37621	17.429	3.30761	3.65309	1.51545	16.9508	3.4792	0.00018364	0.00335213
ENSG00000095066.7	HOOK2	chr19:12873816-12985765	25.5778	8.24916	23.6531	5.234	-1.63139	-2.1739	24.6154	6.74158	-1.86763	0.000184297	0.00335986
ENSG00000154240.12	CEP112	chr17:63524680-64188202	2.1595	11.6435	0.907789	6.40873	2.42533	2.80605	1.53364	9.02612	2.55324	0.000185705	0.00338123
ENSG00000064199.2	SPA17	chr11:124492731-124567414	7.20937	21.2919	4.3436	26.344	1.56104	2.59774	5.77649	23.8179	2.04284	0.000191305	0.00347881
ENSG00000243811.2	APOBEC3D	chr22:39410087-39429256	2.7713	0.403443	3.07552	0.154768	-2.75	-4.22701	2.92341	0.279106	-3.36562	0.00019209	0.00348867
ENSG00000163932.9	PRKCD	chr3:53190024-53226733	6.53408	1.73685	5.60826	0.842592	-1.90543	-2.72019	6.07117	1.28972	-2.23052	0.000192654	0.00349449
ENSG00000092051.11	JPH4	chr14:23980968-24048009	6.76934	2.39007	5.60854	0.968009	-1.49807	-2.52228	6.18894	1.67904	-1.87893	0.000194352	0.00352086
ENSG00000069020.13	MAST4	chr5:65892175-66465423	0.762268	5.72709	0.636258	2.60421	2.89314	2.01619	0.699263	4.16565	2.56609	0.000195185	0.00353149
ENSG00000152601.13	MBNL1	chr3:151961616-152214602	4.12504	22.6954	3.58321	12.4389	2.45706	1.79267	3.85412	17.5671	2.18695	0.000196972	0.00355935
ENSG00000248329.1	RP11-366M4.3	chr4:165798155-165820117	72.4522	0.553616	118.102	1.36483	-7.00637	-6.42475	95.2771	0.959223	-6.62669	0.000197271	0.00356027
ENSG00000107731.8	UNC5B	chr10:72972326-73062621	10.2636	5.19195	11.6809	1.11674	-0.981819	-3.37516	10.9722	3.15435	-1.79682	0.000197582	0.00356143
ENSG00000152763.11	WDR78	chr1:67278567-67390570	0.507336	4.99368	0.554116	5.15524	3.27382	3.19477	0.530726	5.07446	3.24511	0.000198162	0.0035674
ENSG00000157240.2	FZD1	chr7:90893782-90898123	0.635529	23.2646	0.667076	14.9737	5.17213	4.46793	0.651303	19.1192	4.86489	0.000199163	0.00358095
ENSG00000139793.14	MBNL2	chr13:97873687-98046374	1.88442	21.3607	0.738965	10.4557	3.49581	3.80463	1.31169	15.9082	3.59523	0.000203518	0.00365469
ENSG00000085788.9	DDHD2	chr8:38082735-38239790	10.636	41.6387	12.5622	52.7604	1.96796	2.06949	11.5991	47.1996	2.02429	0.0002044	0.00366594
ENSG00000135439.6	AGAP2	chr12:58117571-58154190	1.60715	4.10695	0.547561	4.07791	1.34812	2.87416	1.07736	4.09243	1.92054	0.000205	0.00367214
ENSG00000105647.9	PIK3R2	chr19:18263625-18288927	2.02473	11.3235	25.1658	15.7047	2.47769	-0.679922	13.5953	13.5141	-0.00863565	0.000205298	0.00367288
ENSG00000134897.9	BIVM	chr13:103451398-103493885	3.39206	15.4026	2.84932	19.8172	2.17963	2.79374	3.12069	17.6099	2.49455	0.000209094	0.00373616
ENSG00000075290.7	WNT8B	chr10:102222797-102243501	0.464525	17.9653	0.96516	35.43	5.24339	5.1836	0.714843	26.6976	5.21316	0.000212574	0.00379363
ENSG00000008083.9	JARID2	chr6:15246526-15522252	51.1672	13.043	49.2056	18.4106	-1.97112	-1.41779	50.1864	15.7268	-1.67376	0.000213902	0.003811
ENSG00000204267.9	TAP2	chr6:32780539-32806599	4.81058	0.760532	7.77277	0.976746	-2.64528	-2.97953	6.29167	0.868639	-2.84948	0.000214077	0.003811
ENSG00000178573.6	MAF	chr16:79619739-79634611	1.79276	7.60981	0.979126	9.05075	2.07955	3.1954	1.38594	8.33028	2.58317	0.000215433	0.00383039
ENSG00000112893.5	MAN2A1	chr5:109025066-109205326	67.8493	9.03552	51.7968	26.6312	-2.90727	-0.959483	59.823	17.8334	-1.74584	0.000216076	0.00383709
ENSG00000103024.3	NME3	chr16:1756183-1821731	22.0193	4.29533	15.3409	4.27055	-2.35522	-1.84245	18.6801	4.28294	-2.12353	0.000216646	0.00384246
ENSG00000259539.1	CTD-2651B20.1	chr15:45384847-45493373	0.0730619	2.72143	0.167856	4.37961	5.03933	4.62531	0.120459	3.55052	4.82477	0.00021883	0.00387642
ENSG00000143554.9	SLC27A3	chr1:153746829-153752633	13.8644	3.39491	13.6399	2.51746	-2.02673	-2.43313	13.7522	2.95618	-2.21594	0.000226665	0.00401027
ENSG00000100292.12	HMOX1	chr22:35776353-35790207	4.78002	1.05186	4.2298	0.347773	-2.17344	-3.56688	4.50491	0.699817	-2.67778	0.000227106	0.00401314
ENSG00000145808.4	ADAMTS19	chr5:128795251-129522327	12.8645	4.03816	10.5431	2.16237	-1.66918	-2.28033	11.7038	3.10027	-1.9148	0.00022774	0.0040194
ENSG00000169231.8	THBS3	chr1:155165378-155183614	6.06377	19.4383	4.00348	18.5373	1.67898	2.20828	5.03362	18.9878	1.91435	0.000233406	0.00411435
ENSG00000113396.8	SLC27A6	chr5:127593600-128369335	2.30096	0.402461	3.26237	0.0228303	-2.48617	-6.63916	2.78167	0.212646	-3.67849	0.000234286	0.00412482
ENSG00000171456.12	ASXL1	chr20:30946154-31027122	8.26891	26.0065	6.12912	29.0867	1.65191	2.24475	7.19902	27.5466	1.93526	0.000235094	0.00413397
ENSG00000128965.7	CHAC1	chr15:41245159-41248710	8.40638	1.99548	9.22829	0.937827	-2.06925	-3.28493	8.81733	1.46665	-2.58372	0.000238973	0.00419705
ENSG00000145147.14	SLIT2	chr4:20254882-20622184	2.55542	118.031	2.25976	55.9717	5.52395	4.62434	2.40759	87.0014	5.17247	0.000240048	0.00421078
ENSG00000138166.4	DUSP5	chr10:112257595-112271302	4.46156	0.59687	5.34949	0.925832	-2.88132	-2.51778	4.90553	0.761351	-2.6798	0.000240749	0.00421497
ENSG00000174939.6	ASPHD1	chr16:29911695-29940254	5.99066	1.45133	4.46851	0.360241	-2.03784	-3.59648	5.22959	0.905786	-2.52289	0.000240872	0.00421497
ENSG00000188643.5	S100A16	chr1:153579361-153585644	7.15682	0.526717	3.32989	0.407756	-3.7391	-2.99907	5.24335	0.467236	-3.47428	0.000242718	0.00424212
ENSG00000111670.9	GNPTAB	chr12:102139274-102224716	21.6377	9.56826	22.0425	4.46928	-1.17638	-2.2996	21.8401	7.01877	-1.63699	0.000244761	0.00426744
ENSG00000204264.4	PSMB8	chr6:32808493-32847625	7.70311	0.239259	4.79037	0.523373	-4.95159	-3.16993	6.24674	0.381316	-4.0164	0.000244576	0.00426744
ENSG00000072818.6	ACAP1	chr17:7239847-7254797	17.975	4.90037	14.1621	4.00615	-1.87289	-1.81917	16.0686	4.45326	-1.85014	0.0002498	0.00434477
ENSG00000260512.1	RP13-259F12.2	chr11:106544737-106550066	0.172696	3.07651	0.401759	3.96004	4.07846	3.26928	0.287227	3.51828	3.59175	0.000249741	0.00434477
ENSG00000124374.8	PAIP2B	chr2:71409868-71454213	10.1016	2.38325	8.59935	2.77051	-2.07897	-1.63055	9.35047	2.57688	-1.85739	0.000253645	0.00440631
ENSG00000136040.4	PLXNC1	chr12:94542498-94853764	2.06756	19.2369	1.3256	9.80382	3.21166	2.87733	1.69658	14.5204	3.09363	0.000255512	0.0044334
ENSG00000198646.9	NCOA6	chr20:33284721-33413452	4.4366	17.3311	5.14027	26.177	1.96342	2.34613	4.78843	21.754	2.18248	0.000257118	0.00445588
ENSG00000196542.4	SPTSSB	chr3:161062579-161090668	3.24008	0.0964176	3.11294	0.360364	-4.93267	-3.07588	3.17651	0.228391	-3.76889	0.000259515	0.00449202
ENSG00000163013.6	FBXO41	chr2:73481809-73511559	3.58726	1.11632	3.06696	0.806392	-1.67528	-1.91417	3.32711	0.961356	-1.78581	0.000259975	0.00449456
ENSG00000164251.4	F2RL1	chr5:76114757-76131140	13.037	1.59321	16.1432	1.24475	-3.02468	-3.68635	14.5901	1.41898	-3.35748	0.000261419	0.00451411
ENSG00000171450.4	CDK5R2	chr2:219809350-219826876	0.0501315	1.69444	0.0258653	0.336691	4.82503	3.27299	0.0379984	1.01557	4.56894	0.00026418	0.00455357
ENSG00000172081.9	MOB3A	chr19:2071036-2099592	2.94228	11.0999	1.61184	10.9076	1.91194	2.75095	2.27706	11.0038	2.27024	0.000264654	0.00455357
ENSG00000185847.3	RP1-46F2.2	chr12:111374388-111396012	11.1669	0	9.7928	0	-10.1263	-9.93705	10.4798	0	-11.0341	0.000264446	0.00455357
ENSG00000008853.12	RHOBTB2	chr8:22545171-22941132	1.81592	7.14258	2.19581	10.0197	1.96984	2.1849	2.00587	8.58114	2.09419	0.000266577	0.00458117
ENSG00000139970.12	RTN1	chr14:60062693-60337684	2.07622	32.2928	1.51642	5.48979	3.9527	1.84922	1.79632	18.8913	3.39098	0.000267249	0.00458725
ENSG00000078053.12	AMPH	chr7:38423304-38671167	7.25751	21.5164	2.98516	20.502	1.56657	2.77576	5.12134	21.0092	2.03536	0.000267961	0.00459398
ENSG00000183722.7	LHFP	chr13:39917028-40177665	1.18639	14.0859	1.45662	22.1057	3.55851	3.91451	1.32151	18.0958	3.77035	0.000270663	0.00463479
ENSG00000129991.8	TNNI3	chr19:55663136-55691809	34.5853	1.12251	13.208	1.05361	-4.93298	-3.63546	23.8966	1.08806	-4.45067	0.000272266	0.00465669
ENSG00000124588.14	NQO2	chr6:2988200-3019996	58.7218	13.3026	40.6518	12.8219	-2.14135	-1.66394	49.6868	13.0622	-1.92705	0.000273791	0.0046772
ENSG00000160271.10	RALGDS	chr9:135973106-136039332	6.69821	26.8961	4.4055	21.6857	2.00393	2.29676	5.55185	24.2909	2.12837	0.000278546	0.00475279
ENSG00000135636.8	DYSF	chr2:71680851-71913898	2.75389	0.652589	1.81742	0.242444	-2.06051	-2.85578	2.28566	0.447516	-2.33972	0.00027907	0.0047561
ENSG00000138356.9	AOX1	chr2:201450590-201541787	3.35724	0.205492	1.33151	0.340155	-3.96586	-1.93779	2.34437	0.272823	-3.08004	0.000295012	0.00502184
ENSG00000165156.8	ZHX1	chr8:124232195-124287781	2.39575	16.2771	3.27526	11.6386	2.75917	1.82608	2.8355	13.9579	2.29737	0.000296797	0.00504626
ENSG00000163624.5	CDS1	chr4:85504131-85572491	7.8366	1.47612	6.35865	1.72244	-2.40051	-1.87818	7.09762	1.59928	-2.14643	0.000300201	0.00509809
ENSG00000125124.7	BBS2	chr16:56463044-56554195	5.65676	20.0485	3.60363	24.2761	1.82362	2.74861	4.6302	22.1623	2.25773	0.000310489	0.0052666
ENSG00000131037.10	EPS8L1	chr19:55583387-55599291	18.7816	10.0505	11.2644	4.85015	-0.901386	-1.21398	15.023	7.45032	-1.01131	0.000312164	0.00528878
ENSG00000257151.1	RP11-701H24.2	chr15:25068793-25684128	84.2322	14.344	86.3241	10.3248	-2.55309	-3.06242	85.2782	12.3344	-2.78899	0.000313978	0.00531325
ENSG00000101180.11	HRH3	chr20:60790025-60795323	2.97094	0.470033	2.30835	0.418185	-2.63456	-2.43679	2.63964	0.444109	-2.55794	0.000315395	0.00533095
ENSG00000158859.8	ADAMTS4	chr1:161159537-161184185	1.96934	0.669837	2.48241	0.149523	-1.54176	-3.96571	2.22587	0.40968	-2.42754	0.000322796	0.00544964
ENSG00000099910.12	KLHL22	chr22:20778873-20850170	3.25977	13.7731	2.3085	12.1941	2.07564	2.3961	2.78414	12.9836	2.21936	0.000326229	0.00550114
ENSG00000157851.12	DPYSL5	chr2:27070614-27250064	7.44357	35.3362	2.86111	76.8768	2.24555	4.74306	5.15234	56.1065	3.4436	0.000327183	0.00551078
ENSG00000115295.14	CLIP4	chr2:29320559-29412509	0.281045	2.95303	0.0497073	1.01123	3.34776	4.09625	0.165376	1.98213	3.54389	0.000331438	0.00556555
ENSG00000128739.16	SNRPN	chr15:25068793-25684128	404.566	118.467	264.638	98.0237	-1.77181	-1.43272	334.602	108.245	-1.6281	0.000331596	0.00556555
ENSG00000197635.5	DPP4	chr2:162848750-162931679	2.77817	0.330889	3.20441	0.798897	-3.03194	-1.99053	2.99129	0.564893	-2.39441	0.000330938	0.00556555
ENSG00000140859.10	KIFC3	chr16:57792128-57896957	1.15468	7.75939	0.726806	3.69678	2.73787	2.33081	0.940743	5.72809	2.59979	0.000335798	0.0056295
ENSG00000003147.13	ICA1	chr7:8152813-8384146	20.2212	0.840818	13.8848	3.67463	-4.57159	-1.91496	17.053	2.25772	-2.91432	0.000337796	0.00565641
ENSG00000133640.13	LRRIQ1	chr12:85430091-85657002	1.25334	8.63903	0.860477	3.96687	2.7753	2.19176	1.05691	6.30295	2.57051	0.000338338	0.00565889
ENSG00000135127.7	CCDC64	chr12:120427672-120532298	7.9399	3.28482	6.29498	1.29632	-1.27074	-2.27098	7.11744	2.29057	-1.63352	0.00033898	0.00566305
ENSG00000044090.4	CUL7	chr6:43005354-43042837	3.50487	14.1122	2.12343	10.938	2.00642	2.35942	2.81415	12.5251	2.15207	0.000342629	0.00571738
ENSG00000147202.13	DIAPH2	chrX:95939661-96897588	5.8452	1.3024	5.13873	1.50891	-2.15751	-1.76118	5.49197	1.40565	-1.96227	0.000349804	0.00583034
ENSG00000113763.6	UNC5A	chr5:176237477-176326333	3.87916	1.05502	2.25014	0.436468	-1.86858	-2.33978	3.06465	0.745744	-2.03168	0.000351937	0.0058591
ENSG00000064393.11	HIPK2	chr7:139246315-139720125	3.76662	11.8817	2.60851	14.8857	1.65479	2.50808	3.18757	13.3837	2.06823	0.000356077	0.00592116
ENSG00000169213.5	RAB3B	chr1:52373627-52456436	16.4513	6.81391	15.1966	3.77657	-1.27041	-2.00574	15.8239	5.29524	-1.57844	0.000357298	0.00593462
ENSG00000165443.7	PHYHIPL	chr10:60936349-61122939	0.285171	17.5362	0.356667	19.8647	5.89346	5.76032	0.320919	18.7005	5.8428	0.000366165	0.00607488
ENSG00000113648.12	H2AFY	chr5:134362614-134735604	45.8039	168.799	25.008	144.818	1.88154	2.5333	35.4059	156.809	2.14678	0.000376435	0.00622329
ENSG00000138639.13	ARHGAP24	chr4:86396266-86923823	0.143071	3.2907	0.0299718	0.721963	4.4305	4.19472	0.0865214	2.00633	4.4579	0.000376841	0.00622329
ENSG00000147255.13	IGSF1	chrX:130407479-130533677	20.1083	1.8255	14.047	0.559317	-3.45426	-4.62591	17.0776	1.19241	-3.83454	0.000376809	0.00622329
ENSG00000152784.9	PRDM8	chr4:81104433-81125483	0.0899542	0.395507	0.0193907	1.52139	2.02039	5.70334	0.0546724	0.958449	4.01307	0.000375665	0.00622329
ENSG00000106392.5	C1GALT1	chr7:7196564-7288251	33.7296	7.91026	29.8364	9.12799	-2.09082	-1.70761	31.783	8.51913	-1.89886	0.000377622	0.00622904
ENSG00000057935.9	MTA3	chr2:42721708-42984087	129.575	32.7674	93.5367	30.198	-1.98313	-1.63076	111.556	31.4827	-1.82497	0.000380962	0.00627692
ENSG00000067057.11	PFKP	chr10:3109711-3179904	34.3803	11.9748	27.413	3.87694	-1.52079	-2.81868	30.8967	7.92587	-1.96213	0.000382612	0.0062969
ENSG00000111110.6	PPM1H	chr12:63038366-63328817	8.0089	2.16158	5.92431	1.75188	-1.88466	-1.75197	6.96661	1.95673	-1.82936	0.000383966	0.00631197
ENSG00000243566.2	UPK3B	chr7:76139744-77046115	2.54379	0.146191	3.28797	0.113133	-4.03126	-4.74329	2.91588	0.129662	-4.43899	0.000384497	0.00631348
ENSG00000164929.12	BAALC	chr8:104133259-104345094	2.24074	43.6984	0.873464	158.153	4.27944	7.48403	1.5571	100.926	6.01373	0.000392957	0.00644503
ENSG00000165966.10	PDZRN4	chr12:41582249-41968392	0	15.0722	0.0111568	1.01603	10.5586	5.59981	0.0055784	8.04411	9.57156	0.000396904	0.00650235
ENSG00000128268.11	MGAT3	chr22:39853348-39888199	1.93548	9.98714	1.87882	6.79564	2.36139	1.84925	1.90715	8.39139	2.13457	0.000402364	0.00658431
ENSG00000086475.9	SEPHS1	chr10:13359423-13390297	121.153	35.6768	98.7639	41.3135	-1.76349	-1.25717	109.958	38.4951	-1.51409	0.000403407	0.00659387
ENSG00000120669.11	SOHLH2	chr13:36742344-36871979	5.47584	0.4691	4.38253	0.574822	-3.51731	-2.90898	4.92919	0.521961	-3.22704	0.000406793	0.00663414
ENSG00000164430.10	MB21D1	chr6:74078277-74161999	2.85458	0.320396	3.97559	0.203589	-3.11606	-4.22188	3.41508	0.261993	-3.67916	0.000406492	0.00663414
ENSG00000135205.9	CCDC146	chr7:76139744-77046115	0.531228	4.32929	0.304515	3.59679	3.00315	3.51952	0.417872	3.96304	3.23014	0.000407747	0.00664205
ENSG00000151490.9	PTPRO	chr12:15260716-15750333	1.02518	10.1655	1.04039	2.07101	3.29715	0.98636	1.03279	6.11825	2.56079	0.000408202	0.00664205
ENSG00000064218.4	DMRT3	chr9:976963-991731	0	0.9229	0.0261236	3.54349	6.54365	6.62015	0.0130618	2.23319	6.95325	0.000412368	0.0066947
ENSG00000117152.9	RGS4	chr1:163038564-163046592	0.061118	1.63645	0.1835	0.842454	4.533	2.13929	0.122309	1.23945	3.2891	0.000412291	0.0066947
ENSG00000189067.8	LITAF	chr16:11641852-11730237	105.36	28.9014	49.5334	19.3508	-1.86575	-1.35555	77.4467	24.1261	-1.6824	0.000416648	0.00675656
ENSG00000264098.1	CTD-2350C19.1	chr17:26684603-26734215	0.0602381	1.55624	0.130362	1.15465	4.47891	3.05267	0.0953	1.35545	3.76168	0.000420767	0.00681567
ENSG00000151892.9	GFRA1	chr10:117816443-118033126	0.415901	18.4506	0.557245	4.55347	5.43779	3.00809	0.486573	11.502	4.54897	0.000423286	0.00684876
ENSG00000066468.15	FGFR2	chr10:123237847-123357972	39.2351	13.3237	33.4639	9.73237	-1.55743	-1.78069	36.3495	11.528	-1.65636	0.000424267	0.00685287
ENSG00000143502.9	SUSD4	chr1:223394160-223537544	4.7125	1.11784	2.87779	0.349828	-2.06599	-3.00459	3.79515	0.733834	-2.36273	0.000424493	0.00685287
ENSG00000183762.8	KREMEN1	chr22:29469065-29564321	0.64205	3.93714	1.00073	3.61354	2.59775	1.842	0.82139	3.77534	2.19362	0.000427523	0.00689405
ENSG00000182054.5	IDH2	chr15:90626276-90645736	19.0892	55.279	11.1371	73.2049	1.53348	2.71547	15.1132	64.242	2.08735	0.000429318	0.00691523
ENSG00000144645.9	OSBPL10	chr3:31699381-32119072	11.4172	5.44729	8.24173	0.377378	-1.06622	-4.41288	9.82946	2.91233	-1.7532	0.000430098	0.00692005
ENSG00000150630.2	VEGFC	chr4:177590771-177713881	0.401968	2.7739	0.29227	3.68407	2.7565	3.6113	0.347119	3.22898	3.19918	0.00043165	0.00693727
ENSG00000203832.6	NBPF20	chr1:148250248-148347506	1.92073	10.2512	1.62288	7.56178	2.40998	2.21321	1.77181	8.90649	2.32638	0.000434081	0.00696854
ENSG00000151692.10	RNF144A	chr2:7052407-7218011	5.08315	13.373	3.20408	22.5843	1.39377	2.81348	4.14361	17.9786	2.11598	0.000436887	0.00700211
ENSG00000198369.5	SPRED2	chr2:65537984-65659771	4.8828	20.1695	4.93869	21.883	2.04416	2.14535	4.91075	21.0262	2.09705	0.000437145	0.00700211
ENSG00000137501.11	SYTL2	chr11:85405266-85522184	1.02204	8.98967	1.09871	8.5216	3.12437	2.94393	1.06038	8.75563	3.03967	0.000440864	0.00705383
ENSG00000145911.5	N4BP3	chr5:177540443-177553088	5.78979	1.13887	5.06159	2.11557	-2.33579	-1.25459	5.42569	1.62722	-1.7343	0.000441587	0.00705754
ENSG00000074527.7	NTN4	chr12:96043030-96362370	0.342857	3.40944	0.155315	8.13869	3.2766	5.62328	0.249086	5.77407	4.50745	0.000444255	0.0070923
ENSG00000158457.4	TSPAN33	chr7:128784711-128809538	20.0251	4.62615	11.4376	3.41631	-2.11153	-1.74032	15.7313	4.02123	-1.9666	0.000446195	0.00711537
ENSG00000167100.10	SAMD14	chr17:48172100-48207246	3.42287	13.6064	1.99284	8.51065	1.98786	2.08891	2.70785	11.0585	2.02793	0.000450607	0.00717777
ENSG00000154639.14	CXADR	chr21:18884699-18965897	74.7009	17.9758	59.0934	27.158	-2.05446	-1.12133	66.8972	22.5669	-1.56752	0.00045234	0.00719742
ENSG00000197385.5	ZNF860	chr3:31699381-32119072	2.7276	0.406513	3.03116	0.0762151	-2.71648	-5.14054	2.87938	0.241364	-3.5494	0.000456751	0.00725956
ENSG00000160360.7	GPSM1	chr9:139221931-139268133	4.88713	20.5986	3.18292	12.4767	2.07324	1.96745	4.03503	16.5376	2.03375	0.000458103	0.00727302
ENSG00000186340.10	THBS2	chr6:169613348-169654139	5.41333	2.4792	5.66205	0.770907	-1.1235	-2.86065	5.53769	1.62505	-1.76567	0.00045926	0.00728334
ENSG00000013619.9	MAMLD1	chrX:149529688-149682448	0.188715	2.30396	0.169325	2.74345	3.54159	3.94059	0.17902	2.52371	3.78046	0.000463992	0.0073422
ENSG00000174292.7	TNK1	chr17:7283852-7307456	2.68823	0.701969	1.72542	0.367182	-1.92213	-2.20195	2.20682	0.534575	-2.03534	0.000463487	0.0073422
ENSG00000138653.5	NDST4	chr4:115748918-116035032	0.0257945	0.896069	0.0176118	1.77917	4.66181	6.01786	0.0217032	1.33762	5.6519	0.000464988	0.00734987
ENSG00000004848.6	ARX	chrX:25021810-25034065	0.016926	4.46171	0.0808375	1.98839	7.37568	4.45941	0.0488818	3.22505	5.90562	0.000473606	0.00747788
ENSG00000072422.12	RHOBTB1	chr10:62629195-62786178	4.22018	19.9737	2.7551	13.2732	2.24003	2.2642	3.48764	16.6234	2.25126	0.000480572	0.00757955
ENSG00000166311.5	SMPD1	chr11:6411654-6416228	1.22012	7.84744	1.02471	6.45404	2.67526	2.64321	1.12242	7.15074	2.66608	0.000481547	0.00758661
ENSG00000146242.5	TPBG	chr6:83072922-83080545	19.0812	143.558	16.5861	73.1447	2.91075	2.14011	17.8336	108.351	2.60271	0.000488665	0.00769032
ENSG00000176155.12	CCDC57	chr17:80059335-80170706	3.69859	18.7993	2.72452	8.378	2.3425	1.61704	3.21155	13.5886	2.07934	0.000494	0.00776578
ENSG00000127920.4	GNG11	chr7:93551010-93555831	1.60206	12.3746	1.15513	43.3388	2.94157	5.21743	1.3786	27.8567	4.33179	0.000500455	0.00785868
ENSG00000129990.10	SYT5	chr19:55663136-55691809	2.97701	5.02681	0.369493	0.520304	0.75381	0.482745	1.67325	2.77356	0.727377	0.000504925	0.00791159
ENSG00000196814.10	FAM125B	chr9:129089127-129269320	1.94777	10.8252	1.92053	10.5203	2.46844	2.44748	1.93415	10.6728	2.46111	0.000504536	0.00791159
ENSG00000032444.11	PNPLA6	chr19:7587511-7626650	43.6641	13.7659	47.6325	17.7838	-1.66463	-1.42087	45.6483	15.7749	-1.53264	0.000508911	0.00796537
ENSG00000151322.14	NPAS3	chr14:33404138-34273382	0.121454	7.78933	0.0620717	6.94677	5.89072	6.59284	0.0917629	7.36805	6.25166	0.000509791	0.00797047
ENSG00000105290.5	APLP1	chr19:36316865-36370693	10.5897	76.2383	7.17543	85.8662	2.84668	3.57911	8.88256	81.0523	3.18908	0.000511908	0.00799489
ENSG00000125398.5	SOX9	chr17:70017991-70216859	1.40218	7.32905	1.061	5.77849	2.37767	2.43423	1.23159	6.55377	2.40706	0.000512675	0.00799817
ENSG00000102931.3	ARL2BP	chr16:57279009-57287516	11.5388	34.2697	6.59869	45.4385	1.56961	2.7818	9.06874	39.8541	2.13514	0.000520853	0.00811696
ENSG00000168769.8	TET2	chr4:106067031-106200973	0.928037	6.6556	0.384703	4.5461	2.82902	3.52896	0.65637	5.60085	3.0834	0.000524704	0.00816813
ENSG00000166863.7	TAC3	chr12:57403783-57444982	7.44924	0.216145	15.4589	0.0985947	-5.04371	-7.15427	11.4541	0.15737	-6.14106	0.00052981	0.0082387
ENSG00000145675.10	PIK3R1	chr5:67511547-67597649	5.78177	23.5522	4.16674	15.3006	2.0244	1.87408	4.97425	19.4264	1.96439	0.000530752	0.00824443
ENSG00000135824.8	RGS8	chr1:182615238-182653711	0.332808	2.28282	0.0217435	1.55551	2.74165	5.62403	0.177276	1.91917	3.40004	0.000533297	0.00827502
ENSG00000171105.9	INSR	chr19:7112265-7294045	11.0228	4.60822	13.507	4.17163	-1.25639	-1.69264	12.2649	4.38992	-1.48121	0.000533967	0.00827649
ENSG00000033122.13	LRRC7	chr1:70034080-70671303	0.186015	1.58427	0.120311	1.89211	3.02386	3.86757	0.153163	1.73819	3.46225	0.000538793	0.0083423
ENSG00000140848.12	CPNE2	chr16:57126448-57181878	8.44436	23.1222	4.08702	26.2963	1.45214	2.68276	6.26569	24.7092	1.97865	0.000543378	0.00840425
ENSG00000099260.5	PALMD	chr1:100111498-100160097	0	7.40782	0	1.33941	9.53485	7.07618	0	4.37362	9.77433	0.000547003	0.00845123
ENSG00000253552.3	HOXA-AS2	chr7:27145815-27197555	0	15.0144	0	2.03298	10.5531	7.67453	0	8.52369	10.7362	0.000560952	0.00865744
ENSG00000117602.6	RCAN3	chr1:24829386-24863506	6.54973	1.80738	5.42648	0.759772	-1.85178	-2.82017	5.98811	1.28358	-2.21753	0.000562358	0.00866055
ENSG00000153395.5	LPCAT1	chr5:1456594-1524092	76.215	20.146	76.9994	31.1704	-1.91905	-1.30439	76.6072	25.6582	-1.57787	0.000561871	0.00866055
ENSG00000165300.5	SLITRK5	chr13:88324869-88331868	1.15926	4.44658	1.28525	6.71779	1.93034	2.3769	1.22226	5.58218	2.18669	0.000577575	0.00888539
ENSG00000122068.6	FYTTD1	chr3:197398263-197511317	12.8718	45.112	8.20121	38.1527	1.8085	2.2165	10.5365	41.6324	1.9818	0.000584774	0.00898653
ENSG00000121236.14	TRIM6	chr11:5274419-5667019	7.09897	1.69323	7.49422	1.58744	-2.06137	-2.23194	7.29659	1.64033	-2.14983	0.000587217	0.00901443
ENSG00000101187.11	SLCO4A1	chr20:61272070-61317137	5.34861	0.968093	5.46578	1.09248	-2.45382	-2.31231	5.40719	1.03029	-2.38618	0.000595898	0.00913795
ENSG00000170955.9	PRKCDBP	chr11:6340175-6341877	6.10652	1.19337	4.75145	0.203206	-2.34563	-4.48108	5.42898	0.698288	-2.94982	0.000596567	0.00913846
ENSG00000082014.12	SMARCD3	chr7:150929574-150974982	5.11466	57.3677	4.47693	23.2222	3.48496	2.37233	4.7958	40.295	3.06943	0.000608557	0.00931221
ENSG00000165175.11	MID1IP1	chrX:38660684-38665790	39.8585	10.8569	33.7565	13.2443	-1.87531	-1.34913	36.8075	12.0506	-1.61049	0.000613891	0.00938385
ENSG00000175662.13	TOM1L2	chr17:17746827-17875736	1.10753	19.4928	0.597767	4.10942	4.1253	2.76085	0.852648	11.8011	3.783	0.000616115	0.00940785
ENSG00000060138.8	CSDA	chr12:10851682-10875911	127.998	25.7259	52.0473	18.8003	-2.31438	-1.46858	90.0226	22.2631	-2.01539	0.000620379	0.00946291
ENSG00000160602.9	NEK8	chr17:27046410-27070473	4.65386	1.11791	5.05383	1.22499	-2.04788	-2.03573	4.85384	1.17145	-2.04617	0.000632705	0.0096407
ENSG00000134324.7	LPIN1	chr2:11817720-11967535	4.07833	13.3194	2.87315	12.3376	1.70503	2.09851	3.47574	12.8285	1.88245	0.000640844	0.00975439
ENSG00000062725.5	APPBP2	chr17:58520519-58603580	8.46264	28.7988	4.87989	26.2307	1.76563	2.42393	6.67127	27.5147	2.04335	0.000645131	0.00980926
ENSG00000189337.11	KAZN	chr1:14925199-15478960	3.41754	8.11044	2.0546	18.5414	1.24438	3.16759	2.73607	13.3259	2.28197	0.00064639	0.00981803
ENSG00000128165.7	ADM2	chr22:50919984-50924869	3.07503	0.429357	2.64548	0.184746	-2.81182	-3.76931	2.86025	0.307051	-3.19881	0.000653531	0.00991603
ENSG00000247809.3	NR2F2-AS1	chr15:96670597-96883492	0	2.1397	0	4.23042	7.74799	8.72806	0	3.18506	9.31744	0.000655738	0.00993902
ENSG00000141582.10	CBX4	chr17:77806954-77813228	0.607852	2.4316	0.722444	4.76403	1.9825	2.70442	0.665148	3.59781	2.42657	0.000658891	0.0099763
ENSG00000128266.7	GNAZ	chr22:23401592-23487208	4.4096	14.4099	2.76673	14.9439	1.70608	2.42906	3.58817	14.6769	2.03071	0.000673495	0.010176
ENSG00000142149.4	HUNK	chr21:33245627-33416946	1.8506	7.79525	1.96121	8.89347	2.06868	2.17529	1.9059	8.34436	2.12741	0.000673275	0.010176
ENSG00000109832.7	DDX25	chr11:125773141-125808811	12.8269	1.64709	9.26808	2.93058	-2.95357	-1.65773	11.0475	2.28883	-2.26854	0.000674778	0.0101847
ENSG00000099954.13	CECR2	chr22:17840836-18033845	25.9986	3.32567	18.7169	11.0668	-2.96294	-0.757572	22.3577	7.19624	-1.63478	0.000679191	0.0102406
ENSG00000108175.12	ZMIZ1	chr10:80703084-81076276	8.50533	34.8891	7.67199	48.4523	2.03505	2.65731	8.08866	41.6707	2.36434	0.000686388	0.0103382
ENSG00000164638.5	SLC29A4	chr7:5313999-5343696	3.73837	13.0732	2.05395	11.5212	1.80338	2.48206	2.89616	12.2972	2.08421	0.000695756	0.0104684
ENSG00000157168.13	NRG1	chr8:31496901-32622548	1.54853	5.48039	0.705033	8.41484	1.81672	3.55856	1.12678	6.94761	2.61896	0.000697323	0.010481
ENSG00000269707.1	RP11-13J10.1	chr2:105469742-105542510	0	2.65903	0.0699994	4.9107	8.06017	5.94273	0.0349997	3.78486	6.56601	0.000698201	0.0104832
ENSG00000187210.8	GCNT1	chr9:79034751-79122332	12.912	4.87782	12.7259	2.25638	-1.40257	-2.49044	12.819	3.5671	-1.844	0.000706217	0.0105925
ENSG00000177096.4	FAM109B	chr22:42470254-42475445	3.57897	0.796639	2.60868	0.074821	-2.15357	-4.94828	3.09382	0.43573	-2.81375	0.000712137	0.0106702
ENSG00000112186.7	CAP2	chr6:17393446-17558023	5.58315	25.0427	2.96079	15.7683	2.16323	2.40902	4.27197	20.4055	2.25465	0.00071511	0.0107036
ENSG00000112159.7	MDN1	chr6:90352217-90529442	49.5655	13.3151	30.6453	10.2927	-1.89548	-1.57311	40.1054	11.8039	-1.7641	0.000727659	0.0108801
ENSG00000171617.8	ENC1	chr5:73923233-74072737	8.41898	102.755	2.84789	33.3683	3.60785	3.54589	5.63343	68.0617	3.59358	0.000729455	0.0108956
ENSG00000134121.5	CHL1	chr3:237440-451090	0.139935	6.26202	0.0878838	2.20042	5.38652	4.49711	0.113909	4.23122	5.15484	0.000731494	0.0109147
ENSG00000140575.8	IQGAP1	chr15:90931449-91045475	112.273	49.6392	126.428	34.8234	-1.1773	-1.85989	119.35	42.2313	-1.49871	0.000737416	0.0109917
ENSG00000172554.7	SNTG2	chr2:946553-1371385	5.28932	0.370128	2.88973	0.408233	-3.80125	-2.79354	4.08953	0.389181	-3.37677	0.000743154	0.0110658
ENSG00000148948.3	LRRC4C	chr11:40135752-41481323	0.814622	6.31416	0.197059	3.0629	2.93907	3.89149	0.505841	4.68853	3.19973	0.000746583	0.0110939
ENSG00000166341.6	DCHS1	chr11:6642555-6677085	3.15398	31.7514	2.67309	16.3604	3.32746	2.60912	2.91353	24.0559	3.04337	0.000746495	0.0110939
ENSG00000198931.6	APRT	chr16:88875746-88878352	108.598	26.5801	108.719	51.0579	-2.03017	-1.09025	108.659	38.819	-1.48485	0.000749774	0.0111298
ENSG00000104341.11	LAPTM4B	chr8:98787284-98865241	173.865	61.5135	192.371	78.86	-1.49884	-1.28642	183.118	70.1868	-1.38344	0.000754841	0.0111934
ENSG00000159374.13	C2orf65	chr2:74785009-74875465	4.00174	0.111937	1.98766	0.0306595	-5.04002	-5.61857	2.9947	0.0712982	-5.29702	0.000756414	0.0112052
ENSG00000054793.9	ATP9A	chr20:50213052-50385173	4.08514	16.917	3.50555	13.1172	2.04734	1.90074	3.79535	15.0171	1.98288	0.00076377	0.0113025
ENSG00000079691.14	LRRC16A	chr6:25279305-25620758	15.4505	4.10245	13.3067	4.03279	-1.91052	-1.71981	14.3786	4.06762	-1.8204	0.000765584	0.0113177
ENSG00000162105.9	SHANK2	chr11:70313960-70963623	11.2236	1.59873	10.6006	1.76219	-2.80383	-2.5819	10.9121	1.68046	-2.69538	0.000770436	0.0113778
ENSG00000111252.5	SH2B3	chr12:111843751-111889427	7.10121	2.45478	7.40928	2.14302	-1.52864	-1.78492	7.25525	2.2989	-1.65594	0.000780144	0.0115093
ENSG00000135454.8	B4GALNT1	chr12:58003962-58027138	0.454622	3.2492	0.568826	2.54999	2.81039	2.14494	0.511724	2.8996	2.49087	0.000783356	0.0115449
ENSG00000174871.6	CNIH2	chr11:66036003-66056641	11.3216	28.1008	5.24424	38.132	1.31077	2.85983	8.28292	33.1164	1.99868	0.000786127	0.0115738
ENSG00000130294.10	KIF1A	chr2:241653180-241759725	51.8328	26.5174	39.4905	6.66321	-0.966661	-2.56542	45.6616	16.5903	-1.46037	0.000788051	0.0115903
ENSG00000170231.11	FABP6	chr5:159614373-159665742	12.6666	0.06112	3.16644	0.0410282	-7.4777	-5.95997	7.91652	0.0510741	-7.1423	0.000789412	0.0115985
ENSG00000121057.8	AKAP1	chr17:55162452-55198710	22.4406	4.13408	18.0447	9.85675	-2.43763	-0.871728	20.2426	6.99541	-1.53224	0.000793484	0.0115991
ENSG00000154822.11	PLCL2	chr3:16844158-17132086	13.2563	2.42194	7.92532	3.97252	-2.44759	-0.994606	10.5908	3.19723	-1.72635	0.000791836	0.0115991
ENSG00000156858.7	PRR14	chr16:30662037-30667761	5.66267	18.1857	3.93853	16.8692	1.6815	2.09586	4.8006	17.5275	1.86724	0.000791987	0.0115991
ENSG00000156959.7	LHFPL4	chr3:9543480-9595486	2.68459	0.387354	3.02432	0.267323	-2.76157	-3.45173	2.85445	0.327338	-3.10501	0.000792885	0.0115991
ENSG00000261786.1	RP4-555D20.2	chr3:44158790-44163857	1.9812	0.22153	2.55851	0.444601	-3.10436	-2.49826	2.26986	0.333066	-2.7504	0.000792028	0.0115991
ENSG00000204634.8	TBC1D8	chr2:101436613-101886778	8.76352	3.19417	7.01794	2.47416	-1.45321	-1.50034	7.89073	2.83417	-1.47561	0.000802579	0.0117201
ENSG00000170989.8	S1PR1	chr1:101702443-101707074	1.13069	4.5045	0.819868	10.7442	1.98466	3.69587	0.975279	7.62435	2.9603	0.000805472	0.0117504
ENSG00000182968.3	SOX1	chr13:112721912-112726020	0.0698823	11.0383	0.141753	38.6993	7.11173	7.99481	0.105818	24.8688	7.8103	0.000810902	0.0118177
ENSG00000260396.1	AC012065.7	chr2:20877568-20879005	0.356303	10.8056	0.37493	3.89469	4.88393	3.34254	0.365617	7.35015	4.31075	0.000813347	0.0118413
ENSG00000154162.8	CDH12	chr5:21616370-22853731	0	2.9783	0.0110348	0.156282	8.22318	2.98278	0.0055174	1.56729	7.22395	0.00082165	0.0119501
ENSG00000113296.10	THBS4	chr5:79287133-79379477	13.9841	5.34846	10.6215	6.07796	-1.38493	-0.804315	12.3028	5.71321	-1.10594	0.000828273	0.0120342
ENSG00000227733.3	RP4-565E6.1	chr1:146032647-146253110	5.95606	0.131144	4.88351	0.198359	-5.40154	-4.55373	5.41979	0.164751	-4.99807	0.00083154	0.0120695
ENSG00000082497.7	SERTAD4	chr1:210404800-210419976	0.945679	51.527	0.875018	8.88265	5.75294	3.32884	0.910349	30.2048	5.04455	0.000833798	0.0120779
ENSG00000159228.8	CBR1	chr21:37402367-37498938	32.7388	10.4748	31.4011	10.3573	-1.64314	-1.59923	32.0699	10.4161	-1.62195	0.000833097	0.0120779
ENSG00000131323.10	TRAF3	chr14:103243812-103377837	2.70499	10.0469	2.22069	8.43793	1.88917	1.92111	2.46284	9.24242	1.9058	0.000835789	0.0120946
ENSG00000157570.7	TSPAN18	chr11:44740941-44972840	5.15868	17.2903	4.87048	40.311	1.74293	3.04644	5.01458	28.8006	2.52071	0.000838033	0.0121148
ENSG00000197380.6	DACT3	chr19:47150868-47220384	0.239378	20.4314	0.259875	3.07812	6.35702	3.51637	0.249627	11.7548	5.52933	0.000843459	0.012181
ENSG00000107518.11	ATRNL1	chr10:116853123-117708503	2.74235	10.3092	2.70765	7.01845	1.90659	1.37085	2.725	8.66382	1.66694	0.000846722	0.0122159
ENSG00000187068.2	C3orf70	chr3:184795837-184870802	0.791783	4.57609	0.422462	1.97875	2.51598	2.20122	0.607123	3.27742	2.42287	0.000848965	0.012236
ENSG00000170153.5	RNF150	chr4:141786724-142134031	2.08515	10.012	1.46662	5.91845	2.25805	2.00536	1.77589	7.96523	2.16203	0.000863302	0.0124302
ENSG00000161243.4	FBXO27	chr19:39481353-39523425	4.31169	0.7423	4.93579	0.317031	-2.52222	-3.9187	4.62374	0.529666	-3.11391	0.000869728	0.0125102
ENSG00000242808.2	SOX2-OT	chr3:180701496-181554668	3.6999	19.8544	2.41284	17.1522	2.42073	2.82446	3.05637	18.5033	2.59592	0.000894499	0.0128536
ENSG00000054690.9	PLEKHH1	chr14:67913800-68067004	13.2177	4.11677	16.3676	5.88423	-1.68048	-1.47435	14.7927	5.0005	-1.56378	0.000905776	0.0130027
ENSG00000012211.8	PRICKLE3	chrX:49028272-49042845	2.30393	0.301538	2.43667	0.420234	-2.89286	-2.50762	2.3703	0.360886	-2.69864	0.000930247	0.0133274
ENSG00000137843.7	PAK6	chr15:40453223-40569688	2.77149	0.321088	2.54604	0.0545449	-3.07057	-5.30746	2.65876	0.187816	-3.78817	0.000929579	0.0133274
ENSG00000091490.6	SEL1L3	chr4:25749054-25931435	40.1093	13.6618	31.7003	10.699	-1.55309	-1.56613	35.9048	12.1804	-1.55922	0.000933738	0.0133475
ENSG00000100714.9	MTHFD1	chr14:64854748-65009955	90.276	25.2626	65.7353	30.1869	-1.83693	-1.12249	78.0057	27.7248	-1.49224	0.000933802	0.0133475
ENSG00000105048.12	TNNT1	chr19:55644161-55660722	80.9039	1.23369	33.0127	1.37363	-6.02369	-4.57693	56.9583	1.30366	-5.44387	0.00093629	0.0133475
ENSG00000170049.5	KCNAB3	chr17:7825176-7853236	2.27911	7.41266	1.12002	9.60763	1.69715	3.08933	1.69957	8.51014	2.32063	0.000936228	0.0133475
ENSG00000243620.1	RP11-649A16.1	chr3:146627471-147088443	0	20.3277	0	2.89853	10.9899	8.18415	0	11.6131	11.1822	0.000934975	0.0133475
ENSG00000121851.8	POLR3GL	chr1:145456235-145470388	2.10115	11.7671	1.4426	10.0572	2.47988	2.79295	1.77188	10.9122	2.61918	0.00094022	0.0133902
ENSG00000171132.9	PRKCE	chr2:45878483-46415129	0.442593	1.86738	0.0689888	1.71475	2.05243	4.4486	0.255791	1.79107	2.78387	0.000941531	0.0133956
ENSG00000165410.10	CFL2	chr14:35179592-35184029	13.6742	55.4592	8.28687	37.5191	2.01918	2.17737	10.9805	46.4892	2.08144	0.000951561	0.0135249
ENSG00000132382.10	MYBBP1A	chr17:4400688-4458926	42.3299	13.5611	34.3151	11.8056	-1.64148	-1.53857	38.3225	12.6834	-1.59488	0.000956858	0.0135759
ENSG00000198093.6	ZNF649	chr19:52359054-52408293	37.702	11.0845	27.5413	11.1082	-1.76518	-1.3092	32.6217	11.0964	-1.55532	0.000957032	0.0135759
ENSG00000095321.11	CRAT	chr9:131857088-131911225	3.97725	15.3323	2.07583	8.60445	1.94405	2.04614	3.02654	11.9684	1.98171	0.000962436	0.0136391
ENSG00000187664.7	HAPLN4	chr19:19365556-19384200	5.0095	1.11263	4.17898	1.20242	-2.16066	-1.78871	4.59424	1.15753	-1.98413	0.000965259	0.0136522
ENSG00000253636.1	RP11-531A24.5	chr8:73964412-73975296	3.14418	0.502444	3.30954	0.516979	-2.6218	-2.65516	3.22686	0.509711	-2.65053	0.000964744	0.0136522
ENSG00000068903.15	SIRT2	chr19:39369196-39399533	2.17242	10.2629	1.66893	6.74781	2.23484	2.00901	1.92067	8.50535	2.14386	0.000967514	0.0136572
ENSG00000163053.6	SLC16A14	chr2:230899697-230933715	1.34512	8.06017	1.27365	4.79111	2.57418	1.90312	1.30939	6.42564	2.29057	0.000966995	0.0136572
ENSG00000062282.9	DGAT2	chr11:75479777-75514460	2.17199	0.185459	2.15804	0.331949	-3.48071	-2.66454	2.16502	0.258704	-3.04071	0.000969584	0.0136596
ENSG00000162512.11	SDC3	chr1:31342313-31381608	9.85584	27.9045	6.52899	33.7972	1.5005	2.37019	8.19242	30.8508	1.9123	0.000969499	0.0136596
ENSG00000143570.13	SLC39A1	chr1:153931574-153950164	108.706	32.5332	99.0387	42.6547	-1.74014	-1.21509	103.872	37.5939	-1.46612	0.0009723	0.0136845
ENSG00000117069.10	ST6GALNAC5	chr1:77333125-77531396	2.39883	19.3036	1.15616	8.45829	3.00321	2.86031	1.7775	13.8809	2.96166	0.000993971	0.0139758
ENSG00000103037.7	SETD6	chr16:58549382-58663790	21.9754	5.87345	21.7958	6.41793	-1.90181	-1.76228	21.8856	6.14569	-1.83149	0.000998995	0.0140328
ENSG00000198131.9	ZNF544	chr19:58739959-58827023	22.1737	10.8639	17.7728	6.43089	-1.02863	-1.46515	19.9733	8.64739	-1.20726	0.00100218	0.0140637
ENSG00000242419.1	PCDHGC4	chr5:140710251-140892546	1.02252	3.5028	0.420086	3.4718	1.76645	3.01714	0.721303	3.4873	2.26553	0.0010102	0.0141624
ENSG00000149639.9	SOGA1	chr20:35405844-35492089	4.32602	12.8708	3.15138	14.3754	1.57078	2.18598	3.7387	13.6231	1.86405	0.00101397	0.0141877
ENSG00000186854.6	TRABD2A	chr2:85048773-85134132	4.01083	1.48274	4.86498	0.688116	-1.42953	-2.80386	4.43791	1.08543	-2.02661	0.00101373	0.0141877
ENSG00000077348.4	EXOSC5	chr19:41768400-41930910	30.7152	5.44942	17.53	8.9128	-2.49261	-0.975079	24.1226	7.18111	-1.7474	0.00102621	0.014345
ENSG00000079150.13	FKBP7	chr2:179328390-179343327	7.68032	36.6378	4.43081	19.4635	2.25261	2.13262	6.05556	28.0506	2.21077	0.00103176	0.0144086
ENSG00000116670.9	MAD2L2	chr1:11734537-11751707	120.587	33.0047	96.5994	45.2763	-1.86901	-1.09309	108.593	39.1405	-1.47208	0.00103336	0.014417
ENSG00000082196.15	C1QTNF3	chr5:33986282-34124633	0.967657	10.733	0.938033	4.39462	3.45792	2.21601	0.952845	7.56381	2.9822	0.0010357	0.0144232
ENSG00000213988.5	ZNF90	chr19:20188802-20432114	71.2067	23.1141	63.6316	21.9786	-1.62282	-1.53321	67.4192	22.5464	-1.58005	0.00103581	0.0144232
ENSG00000136997.10	MYC	chr8:128747679-128753674	18.9416	4.93565	12.4962	5.37941	-1.93809	-1.21444	15.7189	5.15753	-1.60681	0.00103973	0.0144637
ENSG00000260362.1	RP11-297M9.1	chr16:9760741-9770700	3.21772	0	3.18609	0	-8.33437	-8.32017	3.20191	0	-9.32504	0.00104255	0.0144889
ENSG00000184588.13	PDE4B	chr1:66258196-66840259	2.13331	4.50963	2.32435	21.0797	1.07637	3.17545	2.22883	12.7947	2.51851	0.00105344	0.0146262
ENSG00000140403.7	DNAJA4	chr15:78542843-78592136	5.70582	1.81068	6.61395	1.03316	-1.65049	-2.66673	6.15989	1.42192	-2.11117	0.00105831	0.0146796
ENSG00000176920.10	FUT2	chr19:49199227-49209207	3.54074	0.924777	2.63194	0.164098	-1.92542	-3.92363	3.08634	0.544438	-2.49221	0.00106772	0.0147959
ENSG00000260214.1	GS1-465N13.1	chr7:19037465-19042039	0.399624	4.51817	0.363212	2.26489	3.46656	2.60773	0.381418	3.39153	3.13583	0.0010725	0.0148478
ENSG00000138336.8	TET1	chr10:70320412-70454239	23.8402	6.26591	18.5081	8.93496	-1.9261	-1.04979	21.1741	7.60044	-1.47754	0.00108043	0.0149432
ENSG00000124098.9	FAM210B	chr20:54933970-54943719	8.32142	31.9678	5.53715	26.6836	1.94044	2.26668	6.92929	29.3257	2.08059	0.00109279	0.0150996
ENSG00000150510.9	FAM124A	chr13:51796502-51857930	14.8388	3.26971	16.925	7.40848	-2.1787	-1.19081	15.8819	5.3391	-1.57182	0.00109894	0.0151701
ENSG00000144619.10	CNTN4	chr3:2140496-3102829	0.795096	7.80567	0.568476	2.55435	3.27914	2.14826	0.681786	5.18001	2.91641	0.00110345	0.0152177
ENSG00000176809.6	LRRC37A3	chr17:62850429-62915598	1.06334	7.26161	2.32727	8.79833	2.76017	1.91404	1.6953	8.02997	2.2405	0.00111765	0.0153987
ENSG00000109787.8	KLF3	chr4:38614321-38702663	7.04022	23.7105	6.07314	27.6002	1.75039	2.18231	6.55668	25.6553	1.9674	0.00113297	0.0155949
ENSG00000006453.9	BAIAP2L1	chr7:97881690-98030380	13.3039	3.75013	10.039	4.71936	-1.82408	-1.08733	11.6715	4.23475	-1.46155	0.00114905	0.0158011
ENSG00000232677.2	LINC00665	chr19:36803968-36822620	75.2742	22.1229	64.7099	28.6189	-1.76616	-1.17674	69.9921	25.3709	-1.46384	0.00117059	0.016082
ENSG00000165732.8	DDX21	chr10:70715883-70744829	120.344	34.7331	90.1801	45.7732	-1.79249	-0.978151	105.262	40.2532	-1.3867	0.00118377	0.0162475
ENSG00000142541.11	RPL13A	chr19:49949554-49995565	102.953	30.3169	69.4515	34.0915	-1.76345	-1.02638	86.2022	32.2042	-1.42034	0.00121	0.0165809
ENSG00000163050.11	ADCK3	chr1:227085236-227175246	8.33003	2.17457	9.63383	3.55392	-1.9327	-1.43614	8.98193	2.86425	-1.64716	0.00121037	0.0165809
ENSG00000186838.9	SELV	chr19:40005752-40011326	5.56172	0.458864	3.78394	0.431166	-3.57088	-3.1043	4.67283	0.445015	-3.37779	0.00121305	0.0166018
ENSG00000075826.11	SEC31B	chr10:102246398-102309763	2.72585	9.18608	2.85392	16.0617	1.74903	2.48846	2.78988	12.6239	2.17587	0.00121669	0.0166358
ENSG00000123609.6	NMI	chr2:152126978-152146571	4.70181	0.634169	4.99564	0.209337	-2.87077	-4.51233	4.84872	0.421753	-3.50762	0.00122721	0.0167638
ENSG00000184860.4	SDR42E1	chr16:82031256-82045093	2.38764	0	4.12838	0.0447195	-7.90547	-6.24087	3.25801	0.0223598	-6.898	0.00122946	0.0167785
ENSG00000034053.10	APBA2	chr15:29129628-29410518	6.59805	16.0184	2.99196	19.6227	1.27834	2.70928	4.795	17.8205	1.89284	0.00123986	0.0169044
ENSG00000060709.9	RIMBP2	chr12:130880681-131200826	0.0988971	1.68611	0.0252779	0.813567	3.96119	4.54505	0.0620875	1.24984	4.22531	0.00125111	0.0170416
ENSG00000117877.6	CD3EAP	chr19:45882891-45982086	11.5735	2.1335	7.80929	3.83982	-2.43403	-1.02225	9.69139	2.98666	-1.6965	0.00127229	0.017281
ENSG00000179222.12	MAGED1	chrX:51546102-51645453	55.1107	194.856	43.8891	166.597	1.82182	1.92419	49.4999	180.726	1.8682	0.00127182	0.017281
ENSG00000253305.1	PCDHGB6	chr5:140710251-140892546	3.07618	28.734	1.87172	11.3617	3.21937	2.59532	2.47395	20.0479	3.01601	0.00127015	0.017281
ENSG00000131969.10	ABHD12B	chr14:51314839-51411454	5.78505	0.0942901	4.30488	0.773233	-5.79615	-2.46181	5.04496	0.433762	-3.52476	0.00127456	0.0172956
ENSG00000108239.7	TBC1D12	chr10:96162260-96295687	0.790458	6.4711	1.08798	3.93021	3.01734	1.84342	0.939219	5.20066	2.46289	0.0012787	0.0173353
ENSG00000135547.4	HEY2	chr6:125899712-126082415	7.36392	2.43996	4.61569	0.673508	-1.58967	-2.75864	5.98981	1.55673	-1.94056	0.00129611	0.0175384
ENSG00000177685.11	EFCAB4A	chr11:818901-842545	8.99753	2.00115	6.55616	1.56941	-2.16311	-2.05566	7.77684	1.78528	-2.11993	0.00129574	0.0175384
ENSG00000185670.7	ZBTB3	chr11:62515790-62521660	6.77994	1.69956	6.68617	1.62662	-1.98978	-2.03262	6.73306	1.66309	-2.01414	0.00130011	0.017576
ENSG00000178531.4	CTXN1	chr19:7989371-8008805	18.5051	53.9118	12.3504	66.2431	1.54216	2.42226	15.4277	60.0774	1.96095	0.00130381	0.0176093
ENSG00000111684.6	LPCAT3	chr12:7074489-7178336	42.7511	19.7682	40.4029	17.0731	-1.11239	-1.24225	41.577	18.4207	-1.17424	0.0013092	0.0176656
ENSG00000186777.7	ZNF732	chr4:264463-299110	10.9769	2.62531	8.70048	1.58754	-2.05974	-2.4469	9.83869	2.10642	-2.22098	0.00131596	0.0177401
ENSG00000131711.10	MAP1B	chr5:71403060-71505395	32.542	124.544	20.9109	121.444	1.93595	2.53739	26.7264	122.994	2.20204	0.00131751	0.0177444
ENSG00000134871.13	COL4A2	chr13:110801317-111165374	23.2308	73.1273	17.9605	67.0786	1.65395	1.90044	20.5956	70.1029	1.76689	0.00132512	0.0178135
ENSG00000182463.8	TSHZ2	chr20:51588945-52120853	0.075427	4.91435	0.0495555	3.18251	5.8491	5.74431	0.0624912	4.04843	5.9083	0.00132422	0.0178135
ENSG00000136305.6	CIDEB	chr14:24769067-24787242	5.35014	0.0934266	2.07913	0.0203358	-5.69559	-6.10574	3.71463	0.0568812	-5.90952	0.0013297	0.0178585
ENSG00000130751.5	NPAS1	chr19:47523076-47549033	3.77086	0.593881	5.35096	0.417115	-2.64637	-3.64979	4.56091	0.505498	-3.16093	0.00135004	0.0181148
ENSG00000166501.8	PRKCB	chr16:23847321-24231932	3.37032	0.198088	2.31598	1.33054	-4.02189	-0.795025	2.84315	0.764314	-1.88838	0.00135137	0.0181157
ENSG00000138821.8	SLC39A8	chr4:103172197-103371167	15.2345	6.29417	15.0221	2.99462	-1.27391	-2.32279	15.1283	4.6444	-1.70261	0.00135409	0.0181352
ENSG00000117407.12	ARTN	chr1:44398991-44402913	5.46394	0.540094	4.5892	0.18976	-3.31483	-4.52504	5.02657	0.364927	-3.7657	0.00136286	0.0182357
ENSG00000164128.2	NPY1R	chr4:164245112-164273086	10.1554	3.68713	5.41602	0.567931	-1.45919	-3.23093	7.78571	2.12753	-1.86919	0.00137239	0.0183462
ENSG00000126500.3	FLRT1	chr11:63742078-63933578	0.120731	0.913005	0.158645	0.649724	2.81974	1.96787	0.139688	0.781365	2.44225	0.0013764	0.0183827
ENSG00000203778.2	C6orf225	chr6:112408801-112423993	2.32503	9.20121	0.697167	7.814	1.97995	3.46779	1.5111	8.5076	2.48924	0.00140647	0.0187668
ENSG00000099219.9	ERMP1	chr9:5629024-5833117	15.7306	5.33694	11.3634	4.00781	-1.55771	-1.50118	13.547	4.67238	-1.53473	0.00141704	0.0188904
ENSG00000143772.5	ITPKB	chr1:226819390-226927024	0.67939	5.09396	0.579255	5.59322	2.88823	3.24929	0.629323	5.34359	3.07587	0.0014216	0.0189337
ENSG00000089248.6	ERP29	chr12:112451119-112461255	139.501	55.3005	111.872	41.2473	-1.33475	-1.43926	125.686	48.2739	-1.38042	0.00143169	0.0190504
ENSG00000198729.4	PPP1R14C	chr6:150464211-150571493	0.181276	4.20017	0.151648	14.6932	4.46015	6.50713	0.166462	9.44668	5.78461	0.00143672	0.0190997
ENSG00000145349.12	CAMK2D	chr4:114372187-114683083	2.9469	36.0795	1.71371	18.7709	3.60942	3.44567	2.33031	27.4252	3.55408	0.00144113	0.0191229
ENSG00000185345.14	PARK2	chr6:161768451-163736524	0.200821	1.6028	0.134677	1.45123	2.93548	3.33627	0.167749	1.52702	3.14868	0.00144039	0.0191229
ENSG00000240771.2	ARHGEF25	chr12:58003962-58027138	7.51325	26.1821	3.09352	13.8552	1.7997	2.15949	5.30339	20.0187	1.91536	0.00144317	0.0191323
ENSG00000198937.7	CCDC167	chr6:37450695-37467698	2.99924	12.6695	2.69553	24.8482	2.07503	3.19974	2.84739	18.7588	2.71772	0.0014546	0.0192661
ENSG00000254087.2	LYN	chr8:56792371-56923939	18.9358	8.16401	18.2031	4.06864	-1.21276	-2.15882	18.5694	6.11632	-1.6014	0.00146567	0.0193948
ENSG00000127418.10	FGFRL1	chr4:1003723-1020685	4.90132	12.9306	2.92187	13.372	1.39772	2.1904	3.9116	13.1513	1.74808	0.00147682	0.0195245
ENSG00000123560.9	PLP1	chrX:103028646-103047548	39.5685	20.2756	37.9997	6.55518	-0.964261	-2.53346	38.7841	13.4154	-1.53122	0.00147822	0.0195249
ENSG00000197747.4	S100A10	chr1:151955390-151966866	43.5596	12.9229	53.1477	5.07706	-1.75228	-3.38537	48.3537	8.99998	-2.42498	0.00148082	0.0195413
ENSG00000183023.13	SLC8A1	chr2:40013592-40838193	0.643175	4.55691	0.48748	1.45306	2.80568	1.55628	0.565327	3.00499	2.39989	0.0015056	0.0198502
ENSG00000158186.8	MRAS	chr3:138066538-138124375	5.20278	19.8639	2.90754	9.87041	1.93075	1.75982	4.05516	14.8672	1.87301	0.00150818	0.0198537
ENSG00000165240.13	ATP7A	chrX:77166193-77305892	1.14873	6.85415	1.23544	3.78983	2.56654	1.60928	1.19209	5.32199	2.15379	0.00150863	0.0198537
ENSG00000142765.12	SYTL1	chr1:27668512-27680421	2.90574	0.501429	1.77968	0.333637	-2.51125	-2.38075	2.34271	0.417533	-2.47412	0.00151289	0.0198735
ENSG00000170190.11	SLC16A5	chr17:73083821-73102257	4.68638	1.40074	4.57239	0.560059	-1.7351	-3.00692	4.62939	0.9804	-2.2336	0.0015117	0.0198735
ENSG00000125966.8	MMP24	chr20:33703159-33872788	5.6154	1.82991	6.50942	0.479069	-1.61232	-3.73663	6.06241	1.15449	-2.38759	0.00152494	0.0199952
ENSG00000187902.7	SHISA7	chr19:55940106-55954230	0.189549	0.925476	0.113682	0.46066	2.22896	1.92805	0.151616	0.693068	2.15614	0.00152442	0.0199952
ENSG00000141519.10	CCDC40	chr17:78010434-78074412	4.83014	9.66412	2.28697	7.60763	0.999084	1.72961	3.55856	8.63588	1.27786	0.00153128	0.02006
ENSG00000179604.8	CDC42EP4	chr17:71279762-71308314	3.75477	25.5742	3.24442	15.0591	2.76462	2.21112	3.4996	20.3167	2.5357	0.00154417	0.0202105
ENSG00000153234.9	NR4A2	chr2:157180943-157198860	0.14103	0.704587	0.210239	1.25078	2.24227	2.51717	0.175634	0.977683	2.44365	0.00156268	0.0204342
ENSG00000011465.12	DCN	chr12:91539024-91576900	0.121729	249.158	0	21.7221	10.8853	11.0856	0.0608645	135.44	11.0059	0.00156919	0.0205006
ENSG00000111266.4	DUSP16	chr12:12628828-12715317	23.5489	6.4671	19.7741	8.77299	-1.86285	-1.17156	21.6615	7.62005	-1.50665	0.00159677	0.020767
ENSG00000131018.17	SYNE1	chr6:151977825-152958936	0.701187	9.93817	0.401515	3.30258	3.80613	3.00894	0.551351	6.62037	3.57393	0.00159429	0.020767
ENSG00000135502.12	SLC26A10	chr12:58003962-58027138	0.559508	5.67534	0.618283	2.13973	3.31946	1.77467	0.588896	3.90754	2.71982	0.00159233	0.020767
ENSG00000168283.8	BMI1	chr10:22604902-22620413	5.89706	27.5873	3.31922	26.8788	2.22402	3.01375	4.60814	27.233	2.5618	0.00159571	0.020767
ENSG00000176956.8	LY6H	chr8:144239330-144242128	0.272336	4.9242	0.268689	2.47526	4.12733	3.15667	0.270513	3.69973	3.74918	0.00159679	0.020767
ENSG00000197566.5	ZNF624	chr17:16524050-16557170	0.893621	3.86963	0.580833	4.10512	2.10213	2.80011	0.737227	3.98738	2.42731	0.00160309	0.02083
ENSG00000125354.18	SEPT6	chrX:118749686-118827333	7.51708	30.8841	5.53214	16.1634	2.03717	1.54511	6.52461	23.5237	1.84936	0.00160894	0.0208871
ENSG00000155760.1	FZD7	chr2:202899309-202903160	133.669	61.1359	92.7925	28.4397	-1.12845	-1.70575	113.231	44.7878	-1.33799	0.00162643	0.0210951
ENSG00000106236.3	NPTX2	chr7:98246608-98259180	9.21853	0.812189	4.6052	1.88332	-3.48856	-1.28547	6.91186	1.34775	-2.35422	0.00162906	0.0211103
ENSG00000115816.9	CEBPZ	chr2:37394962-37551951	79.4301	26.2593	65.1131	29.9583	-1.59649	-1.11973	72.2716	28.1088	-1.36225	0.001631	0.0211163
ENSG00000162729.9	IGSF8	chr1:160061129-160068733	22.6068	9.49832	20.2251	6.65402	-1.25013	-1.60239	21.416	8.07617	-1.40639	0.00163963	0.0212091
ENSG00000005238.13	FAM214B	chr9:35104108-35115999	2.40944	10.0008	1.7645	6.30067	2.04881	1.83038	2.08697	8.15074	1.96295	0.00164519	0.0212619
ENSG00000130055.9	GDPD2	chrX:69642880-69653240	19.4667	2.95246	15.8482	8.73051	-2.71688	-0.859439	17.6575	5.84149	-1.59504	0.00166613	0.0215131
ENSG00000163710.3	PCOLCE2	chr3:142534763-142608045	14.28	2.9885	13.1938	3.02775	-2.25269	-2.11988	13.7369	3.00813	-2.18925	0.00167575	0.0216179
ENSG00000116761.7	CTH	chr1:70876900-70905534	17.3886	3.33623	15.1607	5.50645	-2.37836	-1.45948	16.2747	4.42134	-1.87888	0.00167904	0.021641
ENSG00000120251.14	GRIA2	chr4:158125333-158287227	0.0479816	4.35807	0	1.01118	6.23526	6.67409	0.0239908	2.68462	6.53567	0.00168337	0.0216773
ENSG00000106689.6	LHX2	chr9:126763948-126795580	1.0712	56.4249	0.319343	8.63767	5.70588	4.71465	0.695271	32.5313	5.53799	0.00168797	0.0217172
ENSG00000141338.9	ABCA8	chr17:66863432-66951533	0	0.544268	0	1.25783	5.79251	6.98622	0	0.901049	7.50152	0.0016905	0.0217302
ENSG00000257060.2	RP11-266O8.1	chr15:93855785-94112712	0	3.71233	0	5.45367	8.54006	9.09373	0	4.583	9.84172	0.00169993	0.0218319
ENSG00000086712.8	TXLNG	chrX:16804549-16888537	25.9616	6.97069	22.0194	10.4598	-1.89549	-1.0732	23.9905	8.71524	-1.46032	0.00171456	0.0220003
ENSG00000154146.6	NRGN	chr11:124609828-124635832	0.529124	5.87496	0.365498	16.3367	3.44835	5.44405	0.447311	11.1058	4.61851	0.00173403	0.0222302
ENSG00000198417.5	MT1F	chr16:56691605-56694610	3.07282	0.297412	11.9719	0.242521	-3.32601	-5.56831	7.52236	0.269966	-4.77482	0.00174247	0.0223186
ENSG00000128294.11	TPST2	chr22:26921457-26992681	21.3685	4.6847	15.2313	6.75017	-2.18706	-1.17285	18.2999	5.71744	-1.67753	0.00175979	0.0225203
ENSG00000085185.10	BCORL1	chrX:129115082-129192058	2.05723	5.62029	1.05222	5.76188	1.44551	2.44196	1.55472	5.69108	1.86868	0.00176331	0.0225453
ENSG00000185436.7	IL28RA	chr1:24480646-24514449	2.92953	0.53925	2.26105	0.15686	-2.42005	-3.76665	2.59529	0.348055	-2.88071	0.00177082	0.0226213
ENSG00000184408.5	KCND2	chr7:119913721-120392568	3.13015	1.80517	3.48341	0.157874	-0.790729	-4.37918	3.30678	0.981522	-1.74718	0.00177288	0.0226274
ENSG00000117450.9	PRDX1	chr1:45959537-45988719	667.675	204.925	319.838	187.288	-1.704	-0.772052	493.756	196.107	-1.33214	0.00177585	0.0226452
ENSG00000129946.5	SHC2	chr19:416582-460996	2.56597	11.8551	1.90844	3.13808	2.20354	0.71454	2.2372	7.49659	1.74228	0.00181345	0.0231042
ENSG00000099385.7	BCL7C	chr16:30844946-30906541	5.39157	21.8115	4.20956	14.8431	2.0143	1.8156	4.80056	18.3273	1.93161	0.00181797	0.0231276
ENSG00000136936.6	XPA	chr9:100437190-100459639	4.74577	17.2324	3.60481	19.183	1.85821	2.40859	4.17529	18.2077	2.12327	0.0018185	0.0231276
ENSG00000148053.11	NTRK2	chr9:87283465-87638505	0.00636979	8.73561	0.0378825	41.845	9.06138	9.77169	0.0221261	25.2903	9.86497	0.001829	0.0232406
ENSG00000090861.10	AARS	chr16:70286292-70323446	73.5193	24.4702	55.1752	26.6	-1.5867	-1.05231	64.3473	25.5351	-1.33323	0.00183121	0.0232481
ENSG00000047634.10	SCML1	chrX:17755587-17773105	1.61002	7.78059	1.36337	19.1071	2.26572	3.79907	1.4867	13.4438	3.17246	0.00183939	0.0233313
ENSG00000248487.4	ABHD14A	chr3:51989329-52023213	2.52719	11.7733	1.41198	7.54096	2.21544	2.40876	1.96958	9.65713	2.29079	0.00184693	0.0234063
ENSG00000146386.7	ABRACL	chr6:139349818-139364439	154.637	35.3444	84.3546	44.5833	-2.12901	-0.919812	119.496	39.9639	-1.58007	0.00185873	0.0235352
ENSG00000178445.8	GLDC	chr9:6532463-6645650	13.1553	3.46666	9.88671	5.1789	-1.92096	-0.931519	11.521	4.32278	-1.41319	0.00186129	0.0235469
ENSG00000152402.5	GUCY1A2	chr11:106555147-106889250	0.178658	1.04521	0.154972	2.11112	2.48368	3.68454	0.166815	1.57817	3.20388	0.00186533	0.0235772
ENSG00000110400.5	PVRL1	chr11:119479134-119599794	26.6803	7.70929	25.1185	12.9785	-1.78978	-0.95209	25.8994	10.3439	-1.32372	0.00187059	0.023623
ENSG00000167535.3	CACNB3	chr12:49207576-49222724	13.9116	57.0625	10.3287	27.6476	2.03547	1.41962	12.1201	42.355	1.8047	0.00188224	0.0237492
ENSG00000110446.5	SLC15A3	chr11:60680637-60720002	14.0646	2.1723	8.08728	3.91371	-2.68918	-1.04522	11.0759	3.043	-1.86214	0.00190822	0.0240559
ENSG00000167644.6	C19orf33	chr19:38734674-38795649	5.35286	0	10.9012	0.132045	-9.06686	-6.26332	8.12703	0.0660225	-6.8392	0.00191301	0.0240952
ENSG00000166347.13	CYB5A	chr18:71920529-71959251	40.6714	12.1976	24.9314	9.75602	-1.73659	-1.3527	32.8014	10.9768	-1.57886	0.00191855	0.0241438
ENSG00000160446.13	ZDHHC12	chr9:131464801-131486406	25.7026	6.1055	14.6192	6.67348	-2.07193	-1.13018	20.1609	6.38949	-1.65702	0.00193512	0.0243311
ENSG00000111727.7	HCFC2	chr12:104458234-104498639	0.958737	4.75303	0.749324	3.81615	2.2977	2.33311	0.85403	4.28459	2.32006	0.00194359	0.0244163
ENSG00000186205.8	MARC1	chr1:220960100-220987735	24.4373	7.36325	17.6398	7.17794	-1.7293	-1.296	21.0386	7.2706	-1.53224	0.00195958	0.0245742
ENSG00000198246.7	SLC29A3	chr10:73079014-73123142	10.9809	2.66643	7.76736	2.83562	-2.03793	-1.45054	9.37413	2.75103	-1.76687	0.00195828	0.0245742
ENSG00000171843.11	MLLT3	chr9:20341662-20622542	2.7106	17.0597	1.8593	6.28163	2.64944	1.75094	2.28495	11.6707	2.35012	0.00197161	0.0246821
ENSG00000198865.5	CCDC152	chr5:42756902-42887494	22.1734	4.99187	11.2815	4.09253	-2.14894	-1.46065	16.7275	4.5422	-1.8796	0.00197122	0.0246821
ENSG00000178163.3	ZNF518B	chr4:10441497-10459034	7.41705	22.488	2.45579	20.2935	1.59894	3.04161	4.93642	21.3908	2.11433	0.0019775	0.0247342
ENSG00000233429.5	HOTAIRM1	chr7:27132611-27142430	0	20.9057	0.105131	45.6199	11.0304	8.63056	0.0525655	33.2628	9.17471	0.00198539	0.0248113
ENSG00000228623.2	ZNF883	chr9:115759494-115774507	14.8678	4.81546	12.491	3.71572	-1.62442	-1.74645	13.6794	4.26559	-1.68002	0.00198752	0.0248164
ENSG00000117758.8	STX12	chr1:28099693-28150963	7.13978	25.2047	4.94209	19.435	1.81829	1.97329	6.04094	22.3198	1.88461	0.00199008	0.0248269
ENSG00000130775.11	THEMIS2	chr1:28199054-28213196	4.63196	0.748339	3.32823	1.19332	-2.61382	-1.47206	3.9801	0.97083	-2.02991	0.00199763	0.0248871
ENSG00000242498.3	C15orf38	chr15:90373830-90456188	2.27889	6.63739	0.944441	8.19682	1.53814	3.1041	1.61167	7.41711	2.19881	0.00199837	0.0248871
ENSG00000115738.5	ID2	chr2:8806765-8824583	30.6769	84.2439	36.6364	159.956	1.45712	2.12602	33.6566	122.1	1.85894	0.00204983	0.0255059
ENSG00000171314.7	PGAM1	chr10:99185916-99205774	203.78	53.9533	97.2308	57.1615	-1.91703	-0.766267	150.505	55.5574	-1.43768	0.00205722	0.0255757
ENSG00000181274.5	FRAT2	chr10:99092254-99102960	22.9385	1.10633	39.238	3.92325	-4.36156	-3.31883	31.0883	2.51479	-3.62523	0.00209363	0.0260058
ENSG00000182378.8	PLCXD1	chrX:192988-230886	27.8058	7.07735	20.2887	9.29875	-1.97259	-1.12473	24.0472	8.18805	-1.5537	0.00209735	0.0260296
ENSG00000211445.6	GPX3	chr5:150400123-150408554	15.7708	4.94087	12.4573	3.8297	-1.67242	-1.69908	14.114	4.38528	-1.68526	0.00210241	0.0260699
ENSG00000141446.6	ESCO1	chr18:19109241-19180845	22.6686	7.37469	19.3382	7.94565	-1.61872	-1.28215	21.0034	7.66017	-1.45458	0.0021145	0.0261747
ENSGR0000182378.8	PLCXD1	chrY:142988-180886	26.6487	6.43067	20.284	9.29875	-2.04933	-1.12439	23.4663	7.86471	-1.57652	0.00211317	0.0261747
ENSG00000102878.10	HSF4	chr16:67188082-67203848	0	0.769474	0.113476	0.36587	6.28443	1.606	0.056738	0.567672	3.21348	0.00211683	0.0261809
ENSG00000011201.6	KAL1	chrX:8496914-8700227	28.0846	7.4319	22.3549	4.06617	-1.91655	-2.45595	25.2197	5.74903	-2.13219	0.0021247	0.0262557
ENSG00000147655.6	RSPO2	chr8:108911543-109095913	1.19052	57.876	0.538938	17.7759	5.59148	5.01795	0.864729	37.8259	5.44286	0.00213907	0.0264106
ENSG00000204287.8	HLA-DRA	chr6:32407618-32412823	3.47625	0.264106	3.09313	0.0302653	-3.66887	-6.26804	3.28469	0.147186	-4.43405	0.00214272	0.026433
ENSG00000172201.6	ID4	chr6:19837616-19840915	12.4519	43.5668	14.843	108.507	1.80604	2.8691	13.6474	76.0369	2.47763	0.00215024	0.0265031
ENSG00000184481.11	FOXO4	chrX:70316046-70323385	8.95826	2.92509	6.72759	2.02162	-1.61142	-1.7296	7.84292	2.47335	-1.66293	0.00216032	0.0266044
ENSG00000184428.7	TOP1MT	chr8:144386553-144442149	23.4616	6.33975	17.4222	9.10769	-1.88614	-0.935015	20.4419	7.72372	-1.40358	0.00216497	0.026639
ENSG00000075643.5	MOCOS	chr18:33767481-33852120	3.28631	0.349364	4.49052	0.651728	-3.19734	-2.76578	3.88842	0.500546	-2.94512	0.00217382	0.026725
ENSG00000116641.11	DOCK7	chr1:62920398-63153969	8.51745	27.4176	7.36782	28.4717	1.68544	1.94877	7.94264	27.9446	1.81423	0.00218518	0.0268417
ENSG00000139514.8	SLC7A1	chr13:30083546-30169825	32.0241	8.57223	30.5214	16.5857	-1.90019	-0.879483	31.2727	12.579	-1.31355	0.00219089	0.0268889
ENSG00000010803.12	SCMH1	chr1:41492871-41707826	11.3747	29.1214	6.3212	31.5267	1.35548	2.31648	8.84795	30.324	1.77647	0.00221685	0.0271843
ENSG00000165644.6	COMTD1	chr10:76993726-76995788	8.93454	2.03875	8.81093	1.51522	-2.12627	-2.53192	8.87274	1.77698	-2.31671	0.00222323	0.0272393
ENSG00000185947.9	ZNF267	chr16:31885078-31928668	15.8822	4.2688	14.2417	4.42863	-1.89304	-1.68295	15.0619	4.34872	-1.79107	0.00222773	0.0272712
ENSG00000184809.8	C21orf88	chr21:40928368-41098012	4.53034	0.0898304	3.71177	0.784201	-5.50718	-2.22842	4.12106	0.437016	-3.22259	0.00224958	0.0274984
ENSG00000204257.9	HLA-DMA	chr6:32902405-32949282	7.77535	0.958063	5.98293	0.962963	-3.00759	-2.6228	6.87914	0.960513	-2.83391	0.00225011	0.0274984
ENSG00000234631.1	AL162407.1	chr10:115614419-115676953	0.301386	2.02261	0	3.39462	2.70656	8.41135	0.150693	2.70861	4.12344	0.00225763	0.0275668
ENSG00000100605.11	ITPK1	chr14:93403258-93582665	31.1179	9.64803	22.5734	11.3475	-1.68841	-0.991616	26.8456	10.4978	-1.35419	0.00226246	0.027579
ENSG00000163297.12	ANTXR2	chr4:80822302-81046608	2.65997	10.5165	2.36738	20.1734	1.97913	3.08573	2.51368	15.345	2.6075	0.00226119	0.027579
ENSG00000260719.1	AC009133.17	chr16:29753783-29759620	4.87954	0.827742	7.2693	0.168669	-2.54513	-5.34844	6.07442	0.498205	-3.59471	0.00228006	0.02777
ENSG00000135766.8	EGLN1	chr1:231499496-231560790	3.50696	9.73046	1.27851	7.76381	1.46966	2.59292	2.39274	8.74714	1.86796	0.00230535	0.0280542
ENSG00000186815.8	TPCN1	chr12:113633245-113736390	11.9158	6.1994	9.76573	3.03527	-0.941562	-1.68264	10.8408	4.61733	-1.23044	0.00230869	0.0280711
ENSG00000102996.4	MMP15	chr16:58059469-58080805	15.6157	4.44862	12.6981	6.62749	-1.80925	-0.937038	14.1569	5.53805	-1.35326	0.00233173	0.0282767
ENSG00000105419.11	MEIS3	chr19:47906315-47922780	9.33209	34.0334	6.49385	27.2905	1.86556	2.06956	7.91297	30.662	1.95348	0.00233142	0.0282767
ENSG00000160321.10	ZNF208	chr19:22115759-22193751	12.7548	0.0835827	26.344	0.176353	-7.09171	-7.14384	19.5494	0.129968	-7.17873	0.00232853	0.0282767
ENSG00000177156.6	TALDO1	chr11:747328-765024	240.162	71.8576	151.095	76.9769	-1.74065	-0.972866	195.629	74.4172	-1.39435	0.00233346	0.0282767
ENSG00000156711.11	MAPK13	chr6:36095585-36107842	2.83319	0.690763	3.30901	0.586375	-2.02051	-2.47646	3.0711	0.638569	-2.25694	0.00234081	0.028342
ENSG00000160094.9	ZNF362	chr1:33722145-33766320	9.33101	31.7989	5.3048	22.5932	1.76778	2.08844	7.3179	27.196	1.89317	0.00234714	0.0283709
ENSG00000257315.1	ZBED6	chr1:203764781-203823252	2.28922	8.06903	1.21178	7.69466	1.81304	2.65675	1.7505	7.88185	2.16757	0.00234601	0.0283709
ENSG00000126091.15	ST3GAL3	chr1:44115828-44396831	6.8319	17.1281	2.75391	15.2106	1.32474	2.46124	4.79291	16.1694	1.75323	0.00235416	0.0284139
ENSG00000139220.11	PPFIA2	chr12:81652044-82153332	0.522139	3.37135	0.348061	1.21573	2.66772	1.77536	0.4351	2.29354	2.38481	0.00235466	0.0284139
ENSG00000196182.6	STK40	chr1:36805224-36851497	6.07069	20.2669	5.59211	22.0012	1.73753	1.9742	5.8314	21.1341	1.85676	0.00237345	0.0286167
ENSG00000057294.9	PKP2	chr12:32943678-33049774	8.23439	3.85689	8.04437	1.49638	-1.09224	-2.41869	8.13938	2.67664	-1.60269	0.00238243	0.0287009
ENSG00000101361.10	NOP56	chr20:2632790-2639039	437.049	113.971	370.354	200.704	-1.93903	-0.883803	403.702	157.338	-1.3594	0.00238623	0.0287226
ENSG00000206530.4	WDR52	chr3:112929849-113160457	1.15815	7.15474	1.40461	4.31677	2.61669	1.61289	1.28138	5.73576	2.15792	0.00239522	0.0288067
ENSG00000108231.7	LGI1	chr10:95517565-95557916	2.83619	28.9776	3.10166	25.694	3.34833	3.04624	2.96893	27.3358	3.20062	0.00241339	0.0290011
ENSG00000182472.4	CAPN12	chr19:39138288-39260544	4.93661	0.950692	3.99631	0.108459	-2.3643	-5.07981	4.46646	0.529575	-3.06428	0.00241721	0.0290226
ENSG00000121578.8	B4GALT4	chr3:118930578-119009513	23.1664	9.07345	17.7496	4.90631	-1.35134	-1.85295	20.458	6.98988	-1.54865	0.00243363	0.0291954
ENSG00000198028.3	ZNF560	chr19:9577182-9609283	6.7468	0.963891	10.0107	0.599002	-2.79451	-4.04039	8.37875	0.781447	-3.41418	0.00244551	0.0293135
ENSG00000232821.1	AC003986.6	chr7:19060613-19157295	0.0466951	4.76173	0	1.54911	6.39515	7.28458	0.0233476	3.15542	6.80075	0.00245492	0.0294018
ENSG00000232931.1	LINC00342	chr2:96472865-96481963	1.68734	7.48165	1.42236	7.92193	2.14201	2.46928	1.55485	7.70179	2.30472	0.00246089	0.0294488
ENSG00000174080.6	CTSF	chr11:66330933-66336312	9.54345	2.75861	11.848	3.69278	-1.78686	-1.67918	10.6957	3.22569	-1.72779	0.00247207	0.0295334
ENSG00000234745.4	HLA-B	chr6:31321648-31324965	20.0626	1.6616	19.5749	11.0233	-3.58593	-0.827879	19.8188	6.34245	-1.64298	0.00247202	0.0295334
ENSG00000116132.7	PRRX1	chr1:170631868-170708560	0.224357	244.968	0.0399036	39.9134	10.0297	9.64387	0.13213	142.441	10.0206	0.00250879	0.0299415
ENSG00000150990.3	DHX37	chr12:125431370-125473668	12.3322	3.80991	8.71212	4.70009	-1.69199	-0.888923	10.5222	4.255	-1.30519	0.00251039	0.0299415
ENSG00000121957.7	GPSM2	chr1:109358519-109506111	6.06526	24.3587	5.88966	38.6783	2.00401	2.71319	5.97746	31.5185	2.39762	0.00251754	0.0299546
ENSG00000172318.3	B3GALT1	chr2:168671283-168797654	5.92943	1.03339	6.52572	1.70046	-2.50904	-1.93396	6.22757	1.36693	-2.18363	0.00251773	0.0299546
ENSG00000214338.6	SOGA3	chr6:126102306-130463972	2.57802	6.62792	0.954607	6.74414	1.35888	2.80776	1.76631	6.68603	1.91741	0.00251632	0.0299546
ENSG00000147324.6	MFHAS1	chr8:8640863-8751155	22.0276	6.00808	16.7244	9.33876	-1.87259	-0.83997	19.376	7.67342	-1.33576	0.0025222	0.0299829
ENSG00000242114.1	MTFP1	chr22:30727978-30825045	16.802	2.64026	9.31929	4.11847	-2.66529	-1.17616	13.0606	3.37936	-1.94882	0.00252658	0.0300101
ENSG00000185909.10	KLHDC8B	chr3:49209043-49213917	3.84645	17.4915	3.23897	12.9608	2.18213	1.99721	3.54271	15.2262	2.10206	0.00253083	0.0300358
ENSG00000090661.7	CERS4	chr19:8271619-8327305	31.2419	12.2967	31.922	11.0352	-1.3445	-1.53158	31.5819	11.6659	-1.43641	0.00253746	0.0300897
ENSG00000132635.12	PCED1A	chr20:2815959-3019722	4.78734	12.2944	1.97542	14.121	1.35887	2.83135	3.38138	13.2077	1.96411	0.00254575	0.0301574
ENSG00000177192.8	PUS1	chr12:132409280-132428406	18.9283	4.40428	17.202	8.21135	-2.10106	-1.06597	18.0652	6.30781	-1.51725	0.00254737	0.0301574
ENSG00000132849.14	INADL	chr1:62208148-62629592	11.5169	4.48486	8.8194	1.71368	-1.35866	-2.35682	10.1682	3.09927	-1.71244	0.00255515	0.0302247
ENSG00000116871.11	MAP7D1	chr1:36621179-36646450	23.8833	59.6139	14.2698	59.9038	1.31928	2.06891	19.0765	59.7588	1.64709	0.00257702	0.0304584
ENSG00000196405.8	EVL	chr14:100437785-100610573	42.1318	129.004	22.5818	98.187	1.61421	2.11988	32.3568	113.595	1.81161	0.00260069	0.030713
ENSG00000100271.12	TTLL1	chr22:43434590-43485434	4.14117	15.561	2.54433	12.1382	1.90727	2.24972	3.34275	13.8496	2.0491	0.00261231	0.0308249
ENSG00000159388.5	BTG2	chr1:203274618-203278730	2.70984	8.72144	2.03366	11.0001	1.6827	2.4296	2.37175	9.86077	2.05344	0.00261873	0.0308753
ENSG00000138758.7	SEPT11	chr4:77870855-77961537	41.0145	118.208	30.8971	131.37	1.52689	2.08773	35.9558	124.789	1.79505	0.00263246	0.0310117
ENSG00000183798.4	EMILIN3	chr20:39969559-39995467	1.49178	4.62134	1.26727	6.53951	1.62476	2.35832	1.37953	5.58042	2.01228	0.00264052	0.0310812
ENSG00000162631.13	NTNG1	chr1:107682628-108026080	0.897414	1.74202	1.03972	2.3949	0.949184	1.19597	0.968567	2.06846	1.09069	0.00266579	0.031353
ENSG00000170004.12	CHD3	chr17:7760002-7816078	8.02635	73.4021	4.75745	29.2777	3.19141	2.619	6.3919	51.3399	3.00478	0.00270196	0.0317525
ENSG00000256463.4	SALL3	chr18:76740274-76762677	13.8618	3.516	8.13626	0.123828	-1.97605	-5.92768	10.999	1.81991	-2.59213	0.00271005	0.0318215
ENSG00000102057.5	KCND1	chrX:48818638-48827976	2.07608	0.671535	2.44864	0.232205	-1.61394	-3.34356	2.26236	0.45187	-2.31116	0.00271593	0.0318645
ENSG00000050555.12	LAMC3	chr9:133884468-133969860	4.39663	1.13105	4.81645	1.60727	-1.94932	-1.5774	4.60654	1.36916	-1.7467	0.0027371	0.0320606
ENSG00000135299.11	ANKRD6	chr6:90142888-90348472	3.9342	10.3729	2.6123	13.4798	1.39641	2.36296	3.27325	11.9263	1.86376	0.00273612	0.0320606
ENSG00000116260.12	QSOX1	chr1:180123968-180173165	24.4962	13.6935	27.6357	7.62919	-0.838602	-1.85556	26.066	10.6613	-1.28938	0.00274985	0.0321838
ENSG00000008735.10	MAPK8IP2	chr22:51007289-51052409	0.589901	5.2246	0.641041	3.55043	3.12528	2.45123	0.615471	4.38751	2.82361	0.00275857	0.0322334
ENSG00000124785.4	NRN1	chr6:5998231-6007200	0.104568	9.26342	0.156761	3.83034	6.33883	4.52538	0.130665	6.54688	5.59379	0.00275816	0.0322334
ENSG00000124486.6	USP9X	chrX:40944887-41092185	96.7757	34.2229	77.1679	37.0542	-1.49941	-1.05816	86.9718	35.6386	-1.28699	0.00276361	0.032266
ENSG00000196782.7	MAML3	chr4:140586921-141075338	2.4138	7.08758	1.13872	6.06796	1.55006	2.40356	1.77626	6.57777	1.8858	0.00276694	0.0322787
ENSG00000121310.11	ECHDC2	chr1:53361655-53392884	10.8992	3.28579	11.9492	1.32564	-1.72685	-3.16252	11.4242	2.30572	-2.30631	0.00277672	0.0323665
ENSG00000143147.10	GPR161	chr1:168048780-168106821	4.21753	14.2611	2.73281	13.3228	1.75521	2.28125	3.47517	13.7919	1.98712	0.00279977	0.0326088
ENSG00000162624.9	LHX8	chr1:75593514-75627218	0.432039	5.63841	0.168649	2.68268	3.6756	3.91385	0.300344	4.16054	3.77	0.00280292	0.0326191
ENSG00000127483.12	HP1BP3	chr1:21069153-21113816	52.0015	167.487	39.4985	160.91	1.68723	2.02611	45.75	164.198	1.84348	0.0028134	0.0327058
ENSG00000163617.6	KIAA1407	chr3:113666747-113807269	0.736006	3.90689	0.778285	2.64259	2.39245	1.75061	0.757146	3.27474	2.10544	0.00281492	0.0327058
ENSG00000163584.13	RPL22L1	chr3:170582663-170588272	33.1578	7.17136	40.7535	14.4276	-2.20745	-1.49745	36.9557	10.7995	-1.77436	0.00284731	0.0330554
ENSG00000138617.10	PARP16	chr15:65526797-65592956	1.59905	6.88708	1.36355	7.72068	2.09978	2.49269	1.4813	7.30388	2.29793	0.00286604	0.033246
ENSG00000265681.1	RPL17	chr18:47008027-47018906	60.5226	22.8912	81.5516	30.3016	-1.40229	-1.42802	71.0371	26.5964	-1.41717	0.00287563	0.0333305
ENSG00000128242.8	GAL3ST1	chr22:30950621-30970574	7.05494	1.72942	4.30955	0.96108	-2.02207	-2.15322	5.68224	1.34525	-2.0745	0.00288438	0.0334049
ENSG00000155130.5	MARCKS	chr6:114178540-114184648	57.167	244.164	49.1379	327.208	2.0944	2.73505	53.1525	285.686	2.42611	0.00292281	0.0338228
ENSG00000170545.11	SMAGP	chr12:51632075-51664202	9.2499	3.12476	8.88431	0.943835	-1.56264	-3.22107	9.0671	2.0343	-2.15337	0.0029403	0.0339978
ENSG00000113389.11	NPR3	chr5:32689175-32791819	0.0403568	60.6592	0	10.3819	10.2346	10.0212	0.0201784	35.5206	10.4625	0.0029565	0.0341577
ENSG00000171574.13	ZNF584	chr19:58912870-58929694	1.46027	6.05681	1.3571	7.7711	2.04486	2.50885	1.40868	6.91395	2.29109	0.00298025	0.0344044
ENSG00000151468.9	CCDC3	chr10:12938626-13180291	0.942577	2.81797	0.617695	4.20572	1.56986	2.74764	0.780136	3.51185	2.16327	0.0030066	0.0346808
ENSG00000144134.12	RABL2A	chr2:114384805-114400973	4.85428	19.6244	3.27885	12.8842	2.01309	1.97107	4.06656	16.2543	1.99761	0.00301556	0.0347563
ENSG00000172935.8	MRGPRF	chr11:68771861-68785915	3.24999	0.380915	4.96334	0.332537	-3.05994	-3.85988	4.10666	0.356726	-3.50675	0.00304833	0.0351058
ENSG00000163386.14	NBPF10	chr1:145209118-145370303	3.56011	21.7628	2.31991	15.0101	2.60849	2.68855	2.94001	18.3864	2.64269	0.00305592	0.0351651
ENSG00000005102.8	MEOX1	chr17:41717755-41739322	0	3.0305	0.0288978	0.634663	8.24816	4.05079	0.0144489	1.83258	6.56198	0.00306141	0.0352001
ENSG00000131116.7	ZNF428	chr19:44100543-44124026	10.3475	60.2416	5.93318	36.3519	2.54032	2.61312	8.14034	48.2968	2.56803	0.00308031	0.0353892
ENSG00000213983.6	AP1G2	chr14:23980968-24048009	25.279	12.9255	24.6003	6.16802	-0.967174	-1.99405	24.9397	9.54676	-1.38489	0.00310385	0.0356311
ENSG00000102466.10	FGF14	chr13:102104965-103054799	0.0776866	2.35774	0	0.539056	4.75501	5.77888	0.0388433	1.4484	5.05093	0.00311361	0.0357147
ENSG00000109736.10	MFSD10	chr4:2932287-2936586	67.4227	25.8092	45.8974	22.4242	-1.38501	-1.03303	56.66	24.1167	-1.23213	0.00312995	0.0358735
ENSG00000163377.10	FAM19A4	chr3:68780916-68981761	3.6515	0.101675	2.82121	0.818134	-5.03506	-1.77348	3.23636	0.459904	-2.80159	0.00315385	0.0361186
ENSG00000115935.12	WIPF1	chr2:175411868-175639555	4.56177	23.1378	2.59859	13.2272	2.34005	2.34326	3.58018	18.1825	2.34283	0.0031728	0.0363068
ENSG00000044524.6	EPHA3	chr3:89156673-89531284	0.214771	11.4654	0.089156	28.4554	5.67394	8.16529	0.151964	19.9604	6.99093	0.00317535	0.036307
ENSG00000120093.7	HOXB3	chr17:46618255-46683776	0	6.66137	0.0183447	10.1261	9.38184	8.48221	0.00917235	8.39373	9.21095	0.00319854	0.036531
ENSG00000261373.1	RP11-368I7.2	chr16:89773541-89883065	7.69228	1.43501	7.94805	1.99505	-2.41421	-1.98878	7.82017	1.71503	-2.18569	0.00320002	0.036531
ENSG00000167191.7	GPRC5B	chr16:19566561-19897489	59.3622	11.6941	72.3699	40.3157	-2.34277	-0.843891	65.8661	26.0049	-1.34058	0.00321165	0.0366347
ENSG00000112977.11	DAP	chr5:10679341-10761384	17.5013	57.9412	12.4615	47.8443	1.72655	1.94001	14.9814	52.8927	1.81955	0.00322212	0.036725
ENSG00000126249.2	PDCD2L	chr19:34850384-34919178	45.3288	14.7026	20.2574	7.44074	-1.62369	-1.4437	32.7931	11.0717	-1.56609	0.00323367	0.0368274
ENSG00000102531.10	FNDC3A	chr13:49550047-49783888	12.4001	41.7141	8.47764	28.8622	1.74937	1.76625	10.4389	35.2882	1.75673	0.00324234	0.0368679
ENSG00000134291.7	TMEM106C	chr12:48357351-48362661	13.6763	38.8581	6.35742	34.3011	1.50586	2.42989	10.0169	36.5796	1.86809	0.00324198	0.0368679
ENSG00000171791.10	BCL2	chr18:60790578-60987361	0.506434	2.56568	0.62723	8.05081	2.3183	3.66104	0.566832	5.30825	3.21593	0.00325676	0.0370025
ENSG00000132613.10	MTSS1L	chr16:70695106-70719969	11.9856	34.9354	9.71995	42.85	1.54259	2.13913	10.8528	38.8927	1.84096	0.00326811	0.0371022
ENSG00000122970.11	IFT81	chr12:110562139-110656602	11.1809	38.9842	6.8469	30.8804	1.80094	2.17153	9.0139	34.9323	1.95374	0.00328356	0.0372482
ENSG00000212747.3	FAM127C	chrX:134154542-134156559	3.56378	10.6206	2.82377	20.2023	1.5727	2.83444	3.19378	15.4115	2.26888	0.00330598	0.037473
ENSG00000119139.11	TJP2	chr9:71736208-71870124	26.7245	8.08377	22.652	13.8041	-1.72382	-0.714134	24.6883	10.9439	-1.17333	0.00332332	0.0376399
ENSG00000161940.6	BCL6B	chr17:6926338-6933609	4.72534	0.0641682	1.61623	0.105507	-5.99652	-3.81548	3.17078	0.0848376	-5.14365	0.00337197	0.0381609
ENSG00000065911.7	MTHFD2	chr2:74425688-74621009	89.7349	30.8147	54.3525	27.4347	-1.54174	-0.986085	72.0437	29.1247	-1.30648	0.00338776	0.0383094
ENSG00000250305.4	KIAA1456	chr8:12803150-12889012	0.262857	1.71761	0.356161	1.73859	2.66256	2.25564	0.309509	1.7281	2.46218	0.00340055	0.0384238
ENSG00000213366.7	GSTM2	chr1:110210643-110318050	10.7816	38.5896	5.84646	25.5038	1.83868	2.12318	8.31403	32.0467	1.94591	0.00341664	0.0385753
ENSG00000198060.4	MARCH5	chr10:94050919-94113721	12.2245	37.236	7.70201	34.6838	1.60613	2.1695	9.96326	35.9599	1.85118	0.00343523	0.0387547
ENSG00000166012.10	TAF1D	chr11:93394804-93547861	122.483	40.8149	114.139	58.1394	-1.58518	-0.973081	118.311	49.4772	-1.25767	0.00344086	0.0387879
ENSG00000174428.12	GTF2IRD2B	chr7:74508363-74565623	5.81071	17.357	5.85082	14.2853	1.57708	1.28637	5.83076	15.8211	1.43932	0.0034451	0.0388052
ENSG00000124313.8	IQSEC2	chrX:53262057-53350522	1.98965	1.5896	2.16453	0.84007	-0.322036	-1.35505	2.07709	1.21483	-0.771346	0.00344798	0.0388074
ENSG00000182168.10	UNC5C	chr4:96083654-96470357	0.184029	4.96172	0.139691	16.892	4.6794	6.81907	0.16186	10.9269	6.03376	0.00348265	0.0391668
ENSG00000068971.8	PPP2R5B	chr11:64685024-64703360	0.808381	3.79761	0.621921	1.95832	2.21804	1.63915	0.715151	2.87797	2.00118	0.00349528	0.0392782
ENSG00000213015.4	ZNF580	chr19:56146381-56164527	19.3469	87.0307	9.92302	52.055	2.16884	2.39001	14.635	69.5429	2.24809	0.0035	0.0393006
ENSG00000123933.10	MXD4	chr4:2249158-2264021	6.01101	20.9917	4.14103	11.7961	1.80243	1.50799	5.07602	16.3939	1.69041	0.00354716	0.039799
ENSG00000167925.11	GHDC	chr17:40340816-40346531	4.12293	0.875141	2.74984	0.912424	-2.22319	-1.58108	3.43639	0.893782	-1.93695	0.00356111	0.0399244
ENSG00000113407.9	TARS	chr5:33440801-33469644	242.749	100.357	235.612	93.7237	-1.27424	-1.32983	239.18	97.0403	-1.3014	0.00356489	0.0399357
ENSG00000170382.7	LRRN2	chr1:204586297-204654861	0.618509	7.59297	0.567673	1.8759	3.59655	1.70693	0.593091	4.73444	2.98628	0.00359347	0.0402245
ENSG00000110076.14	NRXN2	chr11:64373645-64490660	5.08457	13.4417	1.82745	7.94663	1.40076	2.11445	3.45601	10.6942	1.62823	0.00359657	0.0402279
ENSG00000104518.6	GSDMD	chr8:144635376-144645232	7.44608	2.63759	4.63246	1.07924	-1.49374	-2.09157	6.03927	1.85841	-1.69762	0.0036096	0.0403423
ENSG00000018236.9	CNTN1	chr12:41086243-41465772	5.00556	2.7563	8.57657	1.13003	-0.858452	-2.91301	6.79106	1.94317	-1.80258	0.00373612	0.0416759
ENSG00000047346.8	FAM214A	chr15:52870038-53002014	1.94982	16.6464	3.48396	8.07054	3.08728	1.20959	2.71689	12.3585	2.1834	0.00373556	0.0416759
ENSG00000180233.9	ZNRF2	chr7:30323922-30452118	7.38191	3.77286	9.29854	2.56395	-0.966469	-1.85457	8.34023	3.1684	-1.39492	0.00373762	0.0416759
ENSG00000080854.9	IGSF9B	chr11:133785184-133826880	2.03993	0.681934	2.28797	0.914871	-1.56687	-1.31304	2.16395	0.798403	-1.4328	0.00376438	0.0419093
ENSG00000169946.9	ZFPM2	chr8:105602960-107072752	0.102497	7.54064	0.124498	2.53178	6.06864	4.24018	0.113498	5.03621	5.41084	0.00376343	0.0419093
ENSG00000267414.1	RP11-456K23.1	chr18:42256891-42259682	0.0355106	2.90545	0.192648	1.9898	6.00137	3.30281	0.114079	2.44762	4.36433	0.00378301	0.0420842
ENSG00000115266.7	APC2	chr19:1446299-1479555	1.45564	9.28036	0.75275	8.41565	2.6642	3.4655	1.1042	8.84801	2.99665	0.00380699	0.0422855
ENSG00000135272.5	MDFIC	chr7:114562208-114659256	2.2847	8.02024	1.62874	7.70784	1.80714	2.23561	1.95672	7.86404	2.00407	0.00380527	0.0422855
ENSG00000186462.7	NAP1L2	chrX:72432134-72434684	15.9975	4.87808	9.027	3.18052	-1.71141	-1.50205	12.5122	4.0293	-1.63353	0.00381743	0.0423688
ENSG00000120087.8	HOXB7	chr17:46684593-46724385	0	1.63568	0	1.52532	7.36254	7.2624	0	1.5805	8.30879	0.00382623	0.0424336
ENSG00000116991.6	SIPA1L2	chr1:232533710-232697304	3.48164	10.7019	2.32242	21.6991	1.61724	3.2184	2.90203	16.2005	2.47887	0.00383114	0.0424554
ENSG00000119280.12	C1orf198	chr1:230972864-231005335	13.9877	46.3698	9.29804	31.4402	1.72831	1.75652	11.6429	38.905	1.74007	0.00384931	0.0426239
ENSG00000151090.13	THRB	chr3:24158650-24541833	2.55934	0.887695	2.19504	0.701995	-1.5171	-1.63087	2.37719	0.794845	-1.5745	0.00385282	0.04263
ENSG00000174007.7	CEP19	chr3:196366556-196462878	0.925756	5.67848	0.868838	4.68344	2.60384	2.41698	0.897297	5.18096	2.52294	0.00386441	0.0427254
ENSG00000121316.5	PLBD1	chr12:14656594-14910897	8.2909	2.46586	6.13415	1.39983	-1.74534	-2.12369	7.21253	1.93284	-1.89705	0.00387314	0.042789
ENSG00000056736.5	IL17RB	chr3:53880606-53899827	11.8276	2.48337	9.60454	4.30106	-2.24721	-1.15717	10.7161	3.39221	-1.65802	0.00389381	0.0429843
ENSG00000145020.10	AMT	chr3:49454210-49460186	23.6661	8.34515	15.0746	6.38465	-1.50269	-1.23814	19.3704	7.3649	-1.39451	0.00390904	0.0431194
ENSG00000070756.9	PABPC1	chr8:101698043-101735037	1977.21	527.355	1196.15	816.691	-1.9066	-0.550531	1586.68	672.023	-1.23942	0.00393644	0.0433883
ENSG00000160796.11	NBEAL2	chr3:46963215-47051193	12.5373	5.45662	8.89341	3.15215	-1.19866	-1.49345	10.7154	4.30438	-1.3148	0.00394118	0.0434073
ENSG00000269343.1	ZNF587B	chr19:58280996-58427978	15.1908	4.16322	16.2877	7.46441	-1.86492	-1.12464	15.7393	5.81381	-1.43603	0.00395045	0.0434761
ENSG00000116396.9	KCNC4	chr1:110753964-110825722	2.21835	0.243433	2.31319	1.11271	-3.1363	-1.04912	2.26577	0.678072	-1.73307	0.00397317	0.0436928
ENSG00000033011.7	ALG1	chr16:4932507-5147809	15.6287	6.03564	15.7371	5.48379	-1.37115	-1.51921	15.6829	5.75971	-1.44433	0.00398428	0.0437814
ENSG00000083168.5	KAT6A	chr8:41786996-41909508	6.37447	14.9237	4.70778	19.9399	1.22594	2.0802	5.54112	17.4318	1.65258	0.00401297	0.044054
ENSG00000164591.9	MYOZ3	chr5:150040435-150058927	10.4958	4.59514	10.5779	2.20538	-1.18987	-2.25679	10.5368	3.40026	-1.63029	0.00401521	0.044054
ENSG00000174306.16	ZHX3	chr20:39657457-39946312	0.976432	2.91487	0.954527	2.7778	1.56808	1.53123	0.96548	2.84633	1.55487	0.00402755	0.0441558
ENSG00000152102.13	FAM168B	chr2:131805448-131851033	22.7675	60.1296	15.4842	69.3513	1.40071	2.1624	19.1258	64.7404	1.75888	0.00407181	0.0446069
ENSG00000163399.11	ATP1A1	chr1:116915289-116961197	147.306	60.8787	162.61	75.543	-1.27467	-1.10595	154.958	68.2109	-1.18374	0.00408307	0.0446962
ENSG00000101353.10	C20orf132	chr20:35729628-35870022	0.466849	3.02805	0.794844	3.69483	2.67154	2.20263	0.630846	3.36144	2.40447	0.00409332	0.0447428
ENSG00000254918.2	RP11-259P6.1	chr11:133778458-133782257	6.79349	1.47512	5.25363	0.866386	-2.1957	-2.58642	6.02356	1.17075	-2.35823	0.00409354	0.0447428
ENSG00000116774.7	OLFML3	chr1:114522062-114524876	43.5097	21.9786	40.3068	3.01984	-0.984914	-3.73407	41.9083	12.4992	-1.74499	0.00410925	0.0448804
ENSG00000130449.5	ZSWIM6	chr5:60628099-60841997	3.87334	11.5714	3.94229	20.3529	1.57644	2.36518	3.90781	15.9622	2.02883	0.00412493	0.0449164
ENSG00000168461.7	RAB31	chr18:9708161-9862553	9.23401	38.3866	7.89102	28.6761	2.05439	1.86024	8.56251	33.5314	1.96878	0.00412504	0.0449164
ENSG00000260978.1	RP11-73C9.1	chr15:23810453-23873064	0	4.25068	0	3.62541	8.73494	8.50597	0	3.93804	9.62317	0.00412068	0.0449164
ENSG00000269751.1	CTC-273B12.8	chr19:48949029-48985571	1.30893	4.9793	2.21991	10.6869	1.91947	2.26214	1.76442	7.8331	2.14723	0.00412109	0.0449164
ENSG00000146005.3	PSD2	chr5:139175405-139224051	0.067043	1.06108	0.0805197	0.237422	3.79726	1.45067	0.0737813	0.649251	3.05392	0.00416396	0.0453059
ENSG00000198624.8	CCDC69	chr5:150560612-150650001	3.18539	0.903343	2.81453	0.689281	-1.80677	-2.01407	2.99996	0.796312	-1.90691	0.00417806	0.045425
ENSG00000084070.6	SMAP2	chr1:40810521-40888998	2.54941	11.5886	1.98756	10.1113	2.18007	2.34108	2.26849	10.8499	2.25538	0.00420252	0.0455189
ENSG00000092445.7	TYRO3	chr15:41849872-41871536	42.2196	14.6182	32.1106	14.7339	-1.5295	-1.12338	37.1651	14.6761	-1.34019	0.00419917	0.0455189
ENSG00000114841.12	DNAH1	chr3:52350334-52434507	0.345815	2.52163	0.304965	2.37765	2.83087	2.92233	0.32539	2.44964	2.89327	0.00419107	0.0455189
ENSG00000183826.12	BTBD9	chr6:38136226-38607924	0.500706	3.74043	0.567345	2.60355	2.87649	2.1785	0.534026	3.17199	2.55924	0.00419994	0.0455189
ENSG00000204576.7	PRR3	chr6:30509153-30531500	9.49407	31.3993	8.53305	34.929	1.72458	2.03202	9.01356	33.1641	1.87887	0.00419977	0.0455189
ENSG00000164649.15	CDCA7L	chr7:21582832-21985702	53.0842	12.9955	54.7177	31.0545	-2.02943	-0.817005	53.901	22.025	-1.29098	0.00420619	0.0455244
ENSG00000176020.7	AMIGO3	chr3:49711434-49761384	3.48655	1.99773	3.3414	0.0668726	-0.800367	-5.44615	3.41397	1.0323	-1.72073	0.00421517	0.045553
ENSG00000258441.1	LINC00641	chr14:21668237-21675059	10.7619	28.0017	8.53781	35.5707	1.37876	2.05747	9.64986	31.7862	1.7193	0.00421432	0.045553
ENSG00000175764.10	TTLL11	chr9:124584206-124855885	0.253821	1.66704	0.485135	2.25657	2.66828	2.19462	0.369478	1.96181	2.3929	0.00424742	0.0458333
ENSG00000187416.7	LHFPL3	chr7:103969103-104549001	0.39431	5.84351	0.264286	0.962127	3.85577	1.82546	0.329298	3.40282	3.34964	0.00424748	0.0458333
ENSG00000090006.13	LTBP4	chr19:41098788-41135725	27.2795	59.0948	15.2688	42.069	1.11493	1.46157	21.2741	50.5819	1.24932	0.00427167	0.0459595
ENSG00000108561.4	C1QBP	chr17:5185557-5372380	213.567	69.8326	130.551	70.2368	-1.61258	-0.89422	172.059	70.0347	-1.2967	0.00426776	0.0459595
ENSG00000142208.11	AKT1	chr14:105235685-105262088	17.9868	54.3311	12.7675	49.4454	1.5943	1.95252	15.3772	51.8882	1.75429	0.00426721	0.0459595
ENSG00000163638.9	ADAMTS9	chr3:64501332-64997143	0.6492	54.4085	0.512945	16.4498	6.36724	4.97614	0.581072	35.4291	5.91792	0.00427196	0.0459595
ENSG00000139438.5	FAM222A	chr12:110152032-110211313	0.398489	1.57744	0.34932	2.0595	1.95833	2.52594	0.373904	1.81847	2.26678	0.00430204	0.0462485
ENSG00000203875.5	SNHG5	chr6:86370709-86388451	224.68	71.7967	265.146	90.3727	-1.64575	-1.55272	244.913	81.0847	-1.59471	0.0043145	0.0463478
ENSG00000149948.9	HMGA2	chr12:66151799-66360075	63.5389	196.843	46.0301	141.833	1.63118	1.62333	54.7845	169.338	1.62798	0.00436935	0.046902
ENSG00000185880.8	TRIM69	chr15:45021185-45060027	2.4366	9.65192	2.04652	5.53867	1.98153	1.43194	2.24156	7.5953	1.75834	0.00438065	0.0469883
ENSG00000174521.7	TTC9B	chr19:40721964-40724306	0.119316	1.79599	0.11303	0.228858	3.80382	0.957142	0.116173	1.01242	3.06978	0.00440325	0.0471954
ENSG00000178568.9	ERBB4	chr2:212240445-213403565	0.418065	5.45743	0.0774988	17.138	3.67496	7.61456	0.247782	11.2977	5.48263	0.00440948	0.0472271
ENSG00000142530.5	FAM71E1	chr19:50970041-50986608	6.41735	0.973797	3.08663	0.631613	-2.70779	-2.27092	4.75199	0.802705	-2.55815	0.0044143	0.0472435
ENSG00000092820.13	EZR	chr6:159186772-159241625	75.2021	31.2832	71.9484	32.3066	-1.26512	-1.15489	73.5753	31.7949	-1.2103	0.00444661	0.0475539
ENSG00000181904.8	C5orf24	chr5:134094468-134195427	9.24079	30.3018	8.88963	27.0876	1.71223	1.60635	9.06521	28.6947	1.66183	0.00445054	0.0475606
ENSG00000138363.10	ATIC	chr2:216176539-216214487	185.185	59.7221	117.857	69.1313	-1.63247	-0.769541	151.521	64.4267	-1.23372	0.00445977	0.0476234
ENSG00000148082.5	SHC3	chr9:91628059-91793682	0.421552	3.75551	0.371737	10.5967	3.12524	4.79626	0.396644	7.1761	4.16021	0.00446304	0.0476234
ENSG00000118640.6	VAMP8	chr2:85788684-85809154	21.2864	0.665284	7.96131	1.6479	-4.97897	-2.26546	14.6239	1.15659	-3.65464	0.00448514	0.0477884
ENSG00000144857.10	BOC	chr3:112929849-113160457	3.5313	23.8001	2.21733	82.2427	2.74922	5.20667	2.87432	53.0214	4.20291	0.0044851	0.0477884
ENSG00000267041.1	ZNF850	chr19:37178513-37263727	6.40762	1.99987	6.37874	2.85322	-1.67494	-1.15789	6.39318	2.42654	-1.39579	0.00448902	0.0477943
ENSG00000128973.7	CLN6	chr15:68346516-68549549	45.7505	12.1018	36.956	24.5904	-1.91769	-0.587518	41.3533	18.3461	-1.17231	0.00450612	0.0479409
ENSG00000183196.4	CHST6	chr16:75509793-75529305	6.06043	2.11358	5.74579	1.64843	-1.5153	-1.7952	5.90311	1.88101	-1.64736	0.00453043	0.0481639
ENSG00000165323.11	FAT3	chr11:92085261-92629618	3.24235	12.8531	3.83048	13.1218	1.98368	1.77371	3.53641	12.9874	1.87528	0.0045348	0.0481747
ENSG00000168135.4	KCNJ4	chr22:38820292-38851205	0.279269	1.03424	0.201674	2.52332	1.85197	3.58111	0.240472	1.77878	2.86131	0.00454417	0.0482386
ENSG00000122861.9	PLAU	chr10:75668934-75682535	7.82793	1.91025	6.20489	2.10293	-2.02918	-1.55648	7.01641	2.00659	-1.80342	0.00455671	0.0483361
ENSG00000048162.15	NOP16	chr5:175792470-175843570	25.9033	7.49223	21.5844	12.3459	-1.7883	-0.805457	23.7439	9.91906	-1.25885	0.00460018	0.0487612
ENSG00000130844.11	ZNF331	chr19:54024234-54083523	34.9064	11.0608	26.1961	14.4089	-1.65714	-0.86194	30.5512	12.7348	-1.26212	0.00461018	0.0488312
ENSG00000132718.7	SYT11	chr1:155829299-155854990	5.97441	28.3866	5.41456	19.536	2.24644	1.84929	5.69449	23.9613	2.0721	0.00461986	0.0488978
ENSG00000131242.11	RAB11FIP4	chr17:29718641-29865236	20.7638	6.56118	11.4435	4.47907	-1.66054	-1.3513	16.1037	5.52013	-1.54376	0.00464845	0.0491642
ENSG00000116983.8	HPCAL4	chr1:40144319-40157361	0.355268	1.83075	0.0972358	0.416151	2.33327	1.99058	0.226252	1.12345	2.28681	0.00465416	0.0491885
ENSG00000008256.11	CYTH3	chr7:6201406-6312275	4.66258	14.7659	2.95376	9.03053	1.66096	1.60898	3.80817	11.8982	1.64229	0.00466071	0.0492214
ENSG00000159788.13	RGS12	chr4:3294754-3441640	8.06184	56.5999	4.41631	17.9066	2.81009	2.01712	6.23907	37.2533	2.577	0.00467508	0.049337
ENSG00000136938.7	ANP32B	chr9:100745637-100778225	44.905	113.388	26.1288	149.79	1.33612	2.51877	35.5169	131.589	1.88931	0.00469379	0.0494706
ENSG00000164007.6	CLDN19	chr1:43198763-43205925	2.39508	0.556151	2.90079	0.117313	-2.08683	-4.51496	2.64794	0.336732	-2.95665	0.00469462	0.0494706
ENSG00000176771.11	NCKAP5	chr2:133429373-134326034	0.31069	3.06519	0.289974	8.7536	3.26142	4.86861	0.300332	5.90939	4.27578	0.00469944	0.0494851
ENSG00000158716.4	DUSP23	chr1:159750721-159752333	19.9972	3.73382	13.3296	5.93856	-2.41793	-1.1651	16.6634	4.83619	-1.78368	0.00472064	0.0496721
ENSG00000145934.11	TENM2	chr5:166711803-167691162	0.303957	3.89626	0.438103	11.1492	3.63715	4.63826	0.37103	7.52273	4.3233	0.00474888	0.0499327
ENSG00000135046.9	ANXA1	chr9:75766672-75785309	0.706833	26.3447	0.678795	10.3522	5.20028	3.91112	0.692814	18.3484	4.71706	0.00476325	0.050014
ENSG00000250899.2	RP11-253E3.3	chr12:3150602-3154116	11.7721	2.83028	8.82395	4.7623	-2.05249	-0.888373	10.298	3.79629	-1.43851	0.00476357	0.050014
ENSG00000187994.8	RINL	chr19:39358469-39368919	2.08597	0.494311	2.16437	0.449686	-2.05523	-2.24188	2.12517	0.471998	-2.15891	0.00476744	0.0500182
ENSG00000182580.2	EPHB3	chr3:183852825-184402546	1.08109	22.3906	0.562452	8.0149	4.3597	3.80926	0.821771	15.2027	4.20118	0.00478032	0.0501167
ENSG00000165495.10	PKNOX2	chr11:125034582-125303285	1.44132	10.8117	0.936244	6.65088	2.89849	2.81543	1.18878	8.73129	2.87148	0.00478762	0.0501566
ENSG00000101098.7	RIMS4	chr20:43380448-43438979	7.2779	2.88232	4.16568	1.77105	-1.33328	-1.22928	5.72179	2.32668	-1.29635	0.00479974	0.0502201
ENSG00000170500.8	LONRF2	chr2:100889752-100939195	0.0623089	2.0335	0.0854929	0.331662	4.82073	1.83911	0.0739009	1.18258	3.91184	0.00480066	0.0502201
ENSG00000100485.7	SOS2	chr14:50583846-50698276	6.08847	17.3132	3.83794	15.7115	1.50619	2.03058	4.96321	16.5123	1.73319	0.00481585	0.0503424
