# Supplementary material for: Transcriptome Comparison of Human Neurons Generated Using Induced Pluripotent Stem Cells Derived from Dental Pulp and Skin Fibroblasts
Source: PLoS One. 2013 Oct 3;8(10):e75682. doi: 10.1371/journal.pone.0075682 (PMC3789755; doi:10.1371/journal.pone.0075682)
Supplement: Table S6 — Ingenuity Pathway Analysis (ii). Ingenuity Pathway Analysis for genes that decreased during transition from iPSCs to neurons. (XLS) [file pone.0075682.s008.xls]

## Sheet: Sheet0
© 2000-2013 Ingenuity Systems, Inc. All rights reserved.
AnalysisName:neuron_vs_iPSC_down Reference set: Ingenuity Knowledge Base (Genes Only)
Relationship to include: Direct and Indirect
Includes Endogenous Chemicals
Optional Analyses: My Pathways My List
Filter Summary:
Consider only molecules and/or relationships where
(species = Human) AND
(confidence = Experimentally Observed)
Cutoff:
bio Functions:
Category	Functions Annotation	p-Value	Molecules	# Molecules
Cancer	uterine serous papillary cancer	1.78E-16	AURKA,BUB1,BUB1B,CBS,CCNA2,CCNB1,CCNB2,CCNE1,CDC20,CDC6,CHRDL1,CKS1B,CLDN3,CLDN4,CLDN7,ENPP1,EPHA1,ERBB2,ERBB3,ESPL1,ETV4,EXO1,F2RL1,FEN1,FOXM1,GAL,GALNT3,GRB7,HMGA1,HMMR,IGF2BP3,ITPR3,KIF11,KIFC1,KRT7,LAD1,LAMC2,MICB,MYBL2,NFE2L3,PLK1,PMAIP1,PRSS8,PTTG1,SCNN1A,SEL1L3,SFRP1,SLC7A5,SPC25,SPINT2,TEK,THBS4,THEMIS2,TK1,TNNT1,TRIP13,TTK,VAMP8,WFDC2	59
Reproductive System Disease	uterine serous papillary cancer	1.78E-16	AURKA,BUB1,BUB1B,CBS,CCNA2,CCNB1,CCNB2,CCNE1,CDC20,CDC6,CHRDL1,CKS1B,CLDN3,CLDN4,CLDN7,ENPP1,EPHA1,ERBB2,ERBB3,ESPL1,ETV4,EXO1,F2RL1,FEN1,FOXM1,GAL,GALNT3,GRB7,HMGA1,HMMR,IGF2BP3,ITPR3,KIF11,KIFC1,KRT7,LAD1,LAMC2,MICB,MYBL2,NFE2L3,PLK1,PMAIP1,PRSS8,PTTG1,SCNN1A,SEL1L3,SFRP1,SLC7A5,SPC25,SPINT2,TEK,THBS4,THEMIS2,TK1,TNNT1,TRIP13,TTK,VAMP8,WFDC2	59
Cell Cycle	G2 phase	2.97E-11	AURKA,BAX,BIRC5,BLM,CCNA2,CCNB1,CCNE1,CDC14B,CDC25A,CDC25C,CHEK1,CHEK2,CLSPN,CSE1L,DDX11,DPP4,DTL,ELAC2,ERBB2,FANCD2,FOXM1,GMNN,HMGA2,MASTL,MELK,MMS22L,MSH2,MYBL2,MYC,NPM1,PLAU,PLK1,PRDM5,RRM2B,TERF1,TERT,TONSL,TP53,TRAF2,WEE1	40
DNA Replication, Recombination, and Repair	metabolism of DNA	4.45E-11	ADM,BAX,BIRC5,CCNA2,CCNE1,CD40,CDC25A,CDC6,CDT1,CECR2,CHEK1,CKS2,CYCS,DBF4,DNA2,DSCC1,DUT,ESCO2,FOXM1,GLI1,GMNN,HMGA1,KIAA0101,LIG1,MYC,ORC1,ORC6,PARP1,PDGFA,PLK1,POLA1,POLD1,POLE,POLE2,PPT1,PRKCD,RAD51,RAN,REXO2,RPA3,SFRP1,SSBP1,TAF4B,TERF1,TFAM,TIMELESS,TIPIN,TP53,WEE1	49
Cell Cycle	cell cycle progression	1.25E-10	ANLN,APOE,AURKA,AURKB,BAX,BIRC5,BLM,BRCA2,BUB1,BUB1B,CARD10,CCNA2,CCNB1,CCNB1IP1,CCNE1,CCNG1,CDC123,CDC20,CDC25A,CDC25C,CDC6,CDCA5,CDH1,CENPE,CENPI,CHAF1A,CHEK1,CHEK2,CHRDL1,CKS1B,CKS2,CLSPN,CSE1L,DBF4,DDB2,DEK,DLGAP5,DNMT3B,DTL,EIF4EBP1,EPCAM,ERBB2,ERBB3,FANCA,FLT1,FOSL1,FOXM1,GLI1,GMNN,HERC5,HJURP,HMOX1,KIF11,KIF22,KIFC1,KNTC1,KRT19,LCK,LIG1,LIN28A,LYN,MASTL,MATK,MELK,MMS22L,MX2,MYBL2,MYC,NOLC1…	100
DNA Replication, Recombination, and Repair	DNA replication	1.39E-10	CCNA2,CCNE1,CD40,CDC25A,CDC6,CDT1,CHEK1,CKS2,DBF4,DNA2,DSCC1,DUT,ESCO2,FOXM1,GLI1,GMNN,HMGA1,KIAA0101,ORC1,ORC6,PDGFA,PLK1,POLA1,POLD1,POLE,POLE2,RPA3,SSBP1,TERF1,TFAM,TIMELESS,TIPIN,TP53,WEE1	34
Cell Cycle	G2/M phase	1.53E-10	AURKA,BIRC5,BLM,CCNA2,CCNB1,CCNE1,CDC14B,CDC25A,CDC25C,CHEK1,CHEK2,CLSPN,CSE1L,DDX11,DPP4,DTL,ELAC2,FANCD2,FOXM1,GMNN,HMGA2,MELK,MSH2,MYBL2,NPM1,PLAU,PLK1,PRDM5,RRM2B,TERT,TP53,TRAF2,WEE1	33
Cell Cycle	segregation of chromosomes	2.35E-10	AURKB,BUB1,CCNA2,CCNB1,CCNB2,CENPW,DDX11,ESPL1,HJURP,NCAPG2,NCAPH,PPP2R5A,PTTG1,RCC1,SGOL1,SKA1,SKA3,SMC2,SMC4,SPC25,TAP2,ZWINT	22
DNA Replication, Recombination, and Repair	segregation of chromosomes	2.35E-10	AURKB,BUB1,CCNA2,CCNB1,CCNB2,CENPW,DDX11,ESPL1,HJURP,NCAPG2,NCAPH,PPP2R5A,PTTG1,RCC1,SGOL1,SKA1,SKA3,SMC2,SMC4,SPC25,TAP2,ZWINT	22
Cellular Assembly and Organization	segregation of chromosomes	2.35E-10	AURKB,BUB1,CCNA2,CCNB1,CCNB2,CENPW,DDX11,ESPL1,HJURP,NCAPG2,NCAPH,PPP2R5A,PTTG1,RCC1,SGOL1,SKA1,SKA3,SMC2,SMC4,SPC25,TAP2,ZWINT	22
Cancer	endometrial cancer	2.50E-10	AURKA,BUB1,BUB1B,CBS,CCNA2,CCNB1,CCNB2,CCNE1,CDC20,CDC6,CDH1,CHRDL1,CKS1B,CLDN3,CLDN4,CLDN7,CSE1L,ENPP1,EPHA1,ERBB2,ERBB3,ESPL1,ETV4,EXO1,F2RL1,FEN1,FOXM1,GAL,GALNT3,GLI1,GRB7,HMGA1,HMMR,IGF2BP3,ITPR3,KIF11,KIFC1,KRT7,LAD1,LAMC2,MICB,MSH2,MSH6,MYBL2,NFE2L3,PLK1,PMAIP1,PRSS8,PTTG1,SCNN1A,SEL1L3,SFRP1,SLC7A5,SPC25,SPINT2,TEK,THBS4,THEMIS2,TK1,TNNT1,TRIP13,TTK,TUBA4A,VAMP8,WFDC2	65
Reproductive System Disease	endometrial cancer	2.50E-10	AURKA,BUB1,BUB1B,CBS,CCNA2,CCNB1,CCNB2,CCNE1,CDC20,CDC6,CDH1,CHRDL1,CKS1B,CLDN3,CLDN4,CLDN7,CSE1L,ENPP1,EPHA1,ERBB2,ERBB3,ESPL1,ETV4,EXO1,F2RL1,FEN1,FOXM1,GAL,GALNT3,GLI1,GRB7,HMGA1,HMMR,IGF2BP3,ITPR3,KIF11,KIFC1,KRT7,LAD1,LAMC2,MICB,MSH2,MSH6,MYBL2,NFE2L3,PLK1,PMAIP1,PRSS8,PTTG1,SCNN1A,SEL1L3,SFRP1,SLC7A5,SPC25,SPINT2,TEK,THBS4,THEMIS2,TK1,TNNT1,TRIP13,TTK,TUBA4A,VAMP8,WFDC2	65
Cell Cycle	mitosis of tumor cell lines	3.59E-10	AURKA,BIRC5,BRCA2,BUB1B,CCNB1,CCNE1,CDC20,CDC25A,CDC25C,CENPE,CENPI,CHEK1,CSE1L,DLGAP5,FOXM1,KIF22,MASTL,MATK,PKMYT1,PLK1,PTTG1,SPC25,STIL,TP53,TTK,WEE1	26
Cancer	colon tumor	5.19E-10	ADSL,AHCY,ALDH16A1,ALYREF,APOC1,BAX,BRIP1,BST2,CCNA2,CCNB2,CCT5,CDC6,CDCA5,CDCA7,CDH1,CHAF1A,CLDN3,CLDN4,DBI,DESI2,DIAPH1,DLGAP5,DPP4,DSCC1,DUSP5,FAM72D,FEN1,FERMT1,FLT1,FLT4,GDF3,GINS2,GJA1,GMNN,GSTP1,GYLTL1B,HLA-DOA,HRASLS5,HSD11B2,IGF2BP1,ITGA6,KIAA0101,KIF18B,KIFC1,LGR4,LIN28A,LIN28B,LYAR,MCM10,MCM3,MCM4,MCM5,MDN1,MELK,MICB,MLF1IP,MMP25,MSH2,MSH6,MTHFD1L,MYC,NUP37,ORC1,PAICS,PARPBP,PDPN,PGAM1…	102
Gastrointestinal Disease	colon tumor	5.19E-10	ADSL,AHCY,ALDH16A1,ALYREF,APOC1,BAX,BRIP1,BST2,CCNA2,CCNB2,CCT5,CDC6,CDCA5,CDCA7,CDH1,CHAF1A,CLDN3,CLDN4,DBI,DESI2,DIAPH1,DLGAP5,DPP4,DSCC1,DUSP5,FAM72D,FEN1,FERMT1,FLT1,FLT4,GDF3,GINS2,GJA1,GMNN,GSTP1,GYLTL1B,HLA-DOA,HRASLS5,HSD11B2,IGF2BP1,ITGA6,KIAA0101,KIF18B,KIFC1,LGR4,LIN28A,LIN28B,LYAR,MCM10,MCM3,MCM4,MCM5,MDN1,MELK,MICB,MLF1IP,MMP25,MSH2,MSH6,MTHFD1L,MYC,NUP37,ORC1,PAICS,PARPBP,PDPN,PGAM1…	102
DNA Replication, Recombination, and Repair	alignment of chromosomes	5.70E-10	AURKA,BIRC5,CCNA2,CENPE,DLGAP5,KIF14,KIF22,KIFC1,NCAPG2,SGOL1,SMC4,TTK	12
Cellular Assembly and Organization	alignment of chromosomes	5.70E-10	AURKA,BIRC5,CCNA2,CENPE,DLGAP5,KIF14,KIF22,KIFC1,NCAPG2,SGOL1,SMC4,TTK	12
Cancer	mammary tumor	5.88E-10	ACP5,ADAMTS8,ADCY2,ALYREF,APOE,ARHGAP8/PRR5-ARHGAP8,ARHGEF5,ASF1B,AURKA,AURKB,BAX,BIRC5,BRCA2,BRIP1,BUB1,C6orf211,CCDC150,CCNA2,CCNB1,CCNB2,CCNE1,CCNG1,CDC20,CDC6,CDCA7,CDH1,CDH3,CDT1,CHEK1,CHEK2,CIRH1A,CLDN3,CLDN4,CNDP2,CSE1L,CYBA,CYCS,DBF4,DDX11,DEPDC1,DESI2,DHX37,DPEP3,DSCC1,EIF3B,EIF4EBP1,ELOVL6,ENO1,ERBB2,ERBB3,FAM174B,FAM72D,FEN1,FGFR4,FLT1,FLT4,FOSL1,FOXO1,GGCT,GLI1,GMNN,GRB7,GRHL2,GSTP1,H…	144
Cell Cycle	arrest in mitosis	7.76E-10	AURKB,BIRC5,BUB1,BUB1B,CCNE1,CENPE,CENPI,CHEK1,CSE1L,KIF22,KNTC1,PLK1,SGOL1,TP53,TTK,ZWINT	16
Cell Cycle	mitosis	1.12E-09	ANLN,APOE,AURKA,AURKB,BIRC5,BRCA2,BUB1,BUB1B,CCNB1,CCNB1IP1,CCNE1,CDC123,CDC20,CDC25A,CDC25C,CDCA5,CENPE,CENPI,CHEK1,CHEK2,CSE1L,DLGAP5,ERBB2,ERBB3,FLT1,FOXM1,GMNN,KIF11,KIF22,KIFC1,KNTC1,MASTL,MATK,NOLC1,ORC6,PKMYT1,PLK1,PRDM5,PTTG1,RAN,RCC1,SGOL1,SKA1,SKA3,SPC25,STIL,TERF1,TP53,TTK,WEE1,ZWINT	51
Cancer	colon cancer	1.53E-09	ADSL,AHCY,ALDH16A1,ALYREF,APOC1,BAX,BRIP1,BST2,CCNA2,CCNB2,CCT5,CDC6,CDCA5,CDCA7,CDH1,CHAF1A,CLDN3,CLDN4,DBI,DESI2,DIAPH1,DLGAP5,DPP4,DSCC1,DUSP5,FAM72D,FEN1,FERMT1,FLT1,FLT4,GDF3,GINS2,GJA1,GMNN,GSTP1,GYLTL1B,HLA-DOA,HRASLS5,HSD11B2,ITGA6,KIAA0101,KIF18B,KIFC1,LGR4,LIN28A,LIN28B,LYAR,MCM10,MCM3,MCM4,MCM5,MDN1,MELK,MICB,MLF1IP,MMP25,MSH2,MSH6,MTHFD1L,MYC,NUP37,ORC1,PAICS,PARPBP,PGAM1,PLK1,POLD1,P…	100
Gastrointestinal Disease	colon cancer	1.53E-09	ADSL,AHCY,ALDH16A1,ALYREF,APOC1,BAX,BRIP1,BST2,CCNA2,CCNB2,CCT5,CDC6,CDCA5,CDCA7,CDH1,CHAF1A,CLDN3,CLDN4,DBI,DESI2,DIAPH1,DLGAP5,DPP4,DSCC1,DUSP5,FAM72D,FEN1,FERMT1,FLT1,FLT4,GDF3,GINS2,GJA1,GMNN,GSTP1,GYLTL1B,HLA-DOA,HRASLS5,HSD11B2,ITGA6,KIAA0101,KIF18B,KIFC1,LGR4,LIN28A,LIN28B,LYAR,MCM10,MCM3,MCM4,MCM5,MDN1,MELK,MICB,MLF1IP,MMP25,MSH2,MSH6,MTHFD1L,MYC,NUP37,ORC1,PAICS,PARPBP,PGAM1,PLK1,POLD1,P…	100
Cell Cycle	mitosis of cervical cancer cell lines	1.64E-09	AURKA,BIRC5,BRCA2,CCNB1,CDC20,CDC25A,CDC25C,CENPE,CENPI,CSE1L,DLGAP5,KIF22,MASTL,PKMYT1,PLK1,PTTG1,SPC25,STIL,TTK,WEE1	20
Cell Cycle	interphase	1.96E-09	APOE,AURKA,BAX,BCAT1,BIRC5,BLM,CCNA2,CCNB1,CCNE1,CCNG1,CD40,CDC14B,CDC25A,CDC25C,CDC6,CDCA2,CDCA5,CDH1,CHEK1,CHEK2,CKS2,CLSPN,CSE1L,DBF4,DDX11,DPP4,DTL,E2F8,EIF4EBP1,ELAC2,ERBB2,ERBB3,FANCD2,FEN1,FOXM1,FOXO1,GJA1,GMNN,GNL3,HMGA1,HMGA2,HMOX1,MASTL,MCM10,MELK,MMS22L,MSH2,MX2,MYBL2,MYC,NASP,NPM1,ORC3,PIM1,PLAU,PLK1,POLA1,POLD1,POLE,PRDM5,PTPN6,RCC1,RRM2B,TBRG4,TERF1,TERT,TFAP4,TFRC,TIMELESS,TIPIN,TO…	74
Cell Cycle	spindle checkpoint of cells	2.58E-09	BIRC5,BUB1,CDT1,CENPI,DLGAP5,ERCC6L,MAD2L2,MASTL,PLK1,TERF1,TTK,USP44	12
DNA Replication, Recombination, and Repair	spindle checkpoint of cells	2.58E-09	BIRC5,BUB1,CDT1,CENPI,DLGAP5,ERCC6L,MAD2L2,MASTL,PLK1,TERF1,TTK,USP44	12
Cell Cycle	checkpoint control	4.33E-09	BUB1,BUB1B,CDC20,CDC25A,CDC25C,CDC6,CHEK1,CHEK2,CKS1B,CKS2,DBF4,EXO1,FANCD2,KNTC1,TERF1,TIPIN,TP53,ZWILCH,ZWINT	19
DNA Replication, Recombination, and Repair	checkpoint control	4.33E-09	BUB1,BUB1B,CDC20,CDC25A,CDC25C,CDC6,CHEK1,CHEK2,CKS1B,CKS2,DBF4,EXO1,FANCD2,KNTC1,TERF1,TIPIN,TP53,ZWILCH,ZWINT	19
Cancer	digestive organ tumor	1.88E-08	ACY1,ADSL,AHCY,AIM1,AKAP1,ALDH16A1,ALPL,ALYREF,ANLN,APOC1,APOE,ARL2,ASF1B,ATIC,ATP1A1,AURKA,BAX,BIRC5,BRCA2,BRIP1,BST2,BUB1B,CCNA2,CCNB1,CCNB2,CCT5,CD74,CD9,CDC6,CDCA5,CDCA7,CDH1,CDH3,CENPH,CHAF1A,CHEK2,CKS1B,CKS2,CLDN3,CLDN4,CLDN7,CSE1L,CYBA,DBI,DESI2,DIAPH1,DLGAP5,DPP4,DSCC1,DSG2,DUSP5,E2F8,ENO1,EPCAM,ERBB2,ERBB3,ETV4,EXO1,EZR,FAM72D,FAM83D,FEN1,FERMT1,FLT1,FLT4,FOXM1,FST,FZD7,GALNT12,GART,GCDH…	204
Gastrointestinal Disease	digestive organ tumor	1.88E-08	ACY1,ADSL,AHCY,AIM1,AKAP1,ALDH16A1,ALPL,ALYREF,ANLN,APOC1,APOE,ARL2,ASF1B,ATIC,ATP1A1,AURKA,BAX,BIRC5,BRCA2,BRIP1,BST2,BUB1B,CCNA2,CCNB1,CCNB2,CCT5,CD74,CD9,CDC6,CDCA5,CDCA7,CDH1,CDH3,CENPH,CHAF1A,CHEK2,CKS1B,CKS2,CLDN3,CLDN4,CLDN7,CSE1L,CYBA,DBI,DESI2,DIAPH1,DLGAP5,DPP4,DSCC1,DSG2,DUSP5,E2F8,ENO1,EPCAM,ERBB2,ERBB3,ETV4,EXO1,EZR,FAM72D,FAM83D,FEN1,FERMT1,FLT1,FLT4,FOXM1,FST,FZD7,GALNT12,GART,GCDH…	204
Cellular Growth and Proliferation	proliferation of cells	1.93E-08	ADAMTS8,ADM,AHCY,AK4,APOE,ARTN,AURKA,AURKB,BAX,BCAT1,BIRC5,BLM,BRCA2,BST2,BUB1,BUB1B,C1QBP,CABLES1,CARD10,CBS,CCKBR,CCL26,CCNA2,CCNB1,CCNE1,CCNG1,CCT5,CD4,CD40,CD55,CD74,CD9,CDC123,CDC25A,CDC25C,CDC45,CDC6,CDCA2,CDCA4,CDCA5,CDCA7,CDCA7L,CDCP1,CDH1,CDT1,CHEK1,CHEK2,CKS1B,CKS2,CLSPN,CNKSR1,CSE1L,CTSC,CTSZ,CXCL5,CYP2S1,DBF4,DDB2,DDX11,DDX21,DKC1,DLGAP5,DNMT3B,DPP4,DSP,DTL,DUSP5,E2F8,EIF4EBP1,EIF5A,E…	258
Cancer	gastrointestinal tract cancer	7.49E-08	ADSL,AHCY,AIM1,ALDH16A1,ALYREF,APOC1,APOE,AURKA,BAX,BIRC5,BRCA2,BRIP1,BST2,BUB1B,CCNA2,CCNB2,CCT5,CD74,CD9,CDC6,CDCA5,CDCA7,CDH1,CDH3,CHAF1A,CHEK2,CLDN3,CLDN4,CLDN7,CSE1L,CYBA,DBI,DESI2,DIAPH1,DLGAP5,DPP4,DSCC1,DSG2,DUSP5,ENO1,EPCAM,ERBB2,ETV4,EXO1,EZR,FAM72D,FEN1,FERMT1,FLT1,FLT4,FOXM1,FST,FZD7,GALNT12,GART,GCDH,GDF3,GINS2,GJA1,GLI1,GMNN,GPX3,GSTP1,GYG2,GYLTL1B,HLA-DOA,HLA-DRA,HMGA2,HMOX1,HRASLS…	171
Gastrointestinal Disease	gastrointestinal tract cancer	7.49E-08	ADSL,AHCY,AIM1,ALDH16A1,ALYREF,APOC1,APOE,AURKA,BAX,BIRC5,BRCA2,BRIP1,BST2,BUB1B,CCNA2,CCNB2,CCT5,CD74,CD9,CDC6,CDCA5,CDCA7,CDH1,CDH3,CHAF1A,CHEK2,CLDN3,CLDN4,CLDN7,CSE1L,CYBA,DBI,DESI2,DIAPH1,DLGAP5,DPP4,DSCC1,DSG2,DUSP5,ENO1,EPCAM,ERBB2,ETV4,EXO1,EZR,FAM72D,FEN1,FERMT1,FLT1,FLT4,FOXM1,FST,FZD7,GALNT12,GART,GCDH,GDF3,GINS2,GJA1,GLI1,GMNN,GPX3,GSTP1,GYG2,GYLTL1B,HLA-DOA,HLA-DRA,HMGA2,HMOX1,HRASLS…	171
Cell Cycle	arrest in G2 phase	8.67E-08	AURKA,BLM,CCNA2,CCNB1,CDC25C,CHEK1,CHEK2,CSE1L,DPP4,ERBB2,FANCD2,FOXM1,MASTL,MMS22L,MSH2,MYBL2,MYC,PLAU,PLK1,PRDM5,RRM2B,TERT,TONSL,TP53,TRAF2,WEE1	26
Cell Cycle	homologous recombination of DNA	9.03E-08	BLM,BRCA2,DMC1,HJURP,MMS22L,PARP1,RAD51,RAD54L,TONSL,TP53	10
DNA Replication, Recombination, and Repair	homologous recombination of DNA	9.03E-08	BLM,BRCA2,DMC1,HJURP,MMS22L,PARP1,RAD51,RAD54L,TONSL,TP53	10
Cancer	breast cancer	1.02E-07	ACP5,ADAMTS8,ADCY2,APOE,ARHGAP8/PRR5-ARHGAP8,ARHGEF5,ASF1B,AURKA,AURKB,BAX,BIRC5,BRCA2,BRIP1,BUB1,C6orf211,CCDC150,CCNB1,CCNE1,CCNG1,CDC20,CDCA7,CDH1,CDH3,CHEK1,CHEK2,CIRH1A,CLDN3,CLDN4,CNDP2,CSE1L,CYBA,CYCS,DDX11,DEPDC1,DESI2,DHX37,DPEP3,DSCC1,EIF3B,EIF4EBP1,ELOVL6,ENO1,ERBB2,ERBB3,FAM174B,FAM72D,FGFR4,FLT1,FLT4,FOSL1,FOXO1,GGCT,GLI1,GRB7,GRHL2,GSTP1,HEATR1,HMGA1,HMGA2,HMHA1,HMMR,HMOX1,HPN,HSP90…	132
Cancer	uterine tumor	1.05E-07	ACTC1,ALYREF,APOE,ARHGEF5,AURKA,AURKB,BRCA2,BRIP1,BUB1,BUB1B,CBS,CCNA2,CCNB1,CCNB2,CCNE1,CDC20,CDC6,CDH1,CDH3,CHRDL1,CKS1B,CLDN3,CLDN4,CLDN7,CSE1L,CTSC,CTSL2,CYBA,DMC1,DUT,EBPL,EIF4EBP1,ENO1,ENPP1,EPCAM,EPHA1,ERBB2,ERBB3,ESPL1,ESRP1,ETV4,EXO1,F2RL1,FAM72D,FEN1,FOXM1,GAL,GALNT3,GLI1,GPX3,GRB7,GRM4,GSTP1,HLA-A,HMGA1,HMGA2,HMGN5,HMMR,HSP90AB1,IGF2BP3,IQGAP1,ITGA6,ITPR3,KIF11,KIFC1,KRT19,KRT7,KRT8,LA…	121
Cell Cycle	M phase	1.18E-07	ANLN,AURKA,AURKB,BIRC5,BRCA2,BUB1B,CCNB1,CCNE1,CD2AP,CDC20,CDT1,CENPE,DIAPH2,DIAPH3,DLGAP5,KIF14,KIF20A,KIF20B,KIF23,KIFC1,MASTL,MYH14,NPM1,PFN1,PIM1,PLK1,PTTG1,SKA1,TERF1,TP53,XRCC5	31
Cancer	colorectal tumor	1.75E-07	ADSL,AHCY,AIM1,ALDH16A1,ALYREF,APOC1,AURKA,BAX,BIRC5,BRIP1,BST2,BUB1B,CCNA2,CCNB2,CCT5,CD9,CDC6,CDCA5,CDCA7,CDH1,CHAF1A,CHEK2,CLDN3,CLDN4,CLDN7,CSE1L,DBI,DESI2,DIAPH1,DLGAP5,DPP4,DSCC1,DSG2,DUSP5,EPCAM,ERBB2,EXO1,EZR,FAM72D,FEN1,FERMT1,FLT1,FLT4,FST,FZD7,GALNT12,GART,GCDH,GDF3,GINS2,GJA1,GLI1,GMNN,GPX3,GSTP1,GYG2,GYLTL1B,HLA-DOA,HLA-DRA,HMOX1,HRASLS5,HSD11B2,IDO1,IGF2BP1,ITGA6,ITPR3,KIAA0101,KIF1…	148
Gastrointestinal Disease	colorectal tumor	1.75E-07	ADSL,AHCY,AIM1,ALDH16A1,ALYREF,APOC1,AURKA,BAX,BIRC5,BRIP1,BST2,BUB1B,CCNA2,CCNB2,CCT5,CD9,CDC6,CDCA5,CDCA7,CDH1,CHAF1A,CHEK2,CLDN3,CLDN4,CLDN7,CSE1L,DBI,DESI2,DIAPH1,DLGAP5,DPP4,DSCC1,DSG2,DUSP5,EPCAM,ERBB2,EXO1,EZR,FAM72D,FEN1,FERMT1,FLT1,FLT4,FST,FZD7,GALNT12,GART,GCDH,GDF3,GINS2,GJA1,GLI1,GMNN,GPX3,GSTP1,GYG2,GYLTL1B,HLA-DOA,HLA-DRA,HMOX1,HRASLS5,HSD11B2,IDO1,IGF2BP1,ITGA6,ITPR3,KIAA0101,KIF1…	148
Cell Cycle	G2/M phase transition	1.95E-07	BIRC5,BLM,CCNA2,CCNB1,CCNE1,CDC25C,CHEK2,DDX11,DPP4,ELAC2,FANCD2,FOXM1,MELK,PLAU,PLK1,RRM2B,TERT,TP53	18
Cancer	colorectal cancer	3.24E-07	ADSL,AHCY,AIM1,ALDH16A1,ALYREF,APOC1,AURKA,BAX,BIRC5,BRIP1,BST2,BUB1B,CCNA2,CCNB2,CCT5,CD9,CDC6,CDCA5,CDCA7,CDH1,CHAF1A,CHEK2,CLDN3,CLDN4,CLDN7,CSE1L,DBI,DESI2,DIAPH1,DLGAP5,DPP4,DSCC1,DSG2,DUSP5,EPCAM,ERBB2,EXO1,EZR,FAM72D,FEN1,FERMT1,FLT1,FLT4,FST,FZD7,GALNT12,GART,GCDH,GDF3,GINS2,GJA1,GLI1,GMNN,GPX3,GSTP1,GYG2,GYLTL1B,HLA-DOA,HLA-DRA,HMOX1,HRASLS5,HSD11B2,IDO1,ITGA6,ITPR3,KIAA0101,KIF18B,KIF20…	146
Gastrointestinal Disease	colorectal cancer	3.24E-07	ADSL,AHCY,AIM1,ALDH16A1,ALYREF,APOC1,AURKA,BAX,BIRC5,BRIP1,BST2,BUB1B,CCNA2,CCNB2,CCT5,CD9,CDC6,CDCA5,CDCA7,CDH1,CHAF1A,CHEK2,CLDN3,CLDN4,CLDN7,CSE1L,DBI,DESI2,DIAPH1,DLGAP5,DPP4,DSCC1,DSG2,DUSP5,EPCAM,ERBB2,EXO1,EZR,FAM72D,FEN1,FERMT1,FLT1,FLT4,FST,FZD7,GALNT12,GART,GCDH,GDF3,GINS2,GJA1,GLI1,GMNN,GPX3,GSTP1,GYG2,GYLTL1B,HLA-DOA,HLA-DRA,HMOX1,HRASLS5,HSD11B2,IDO1,ITGA6,ITPR3,KIAA0101,KIF18B,KIF20…	146
Cancer	uterine cancer	3.37E-07	APOE,ARHGEF5,AURKA,BRCA2,BRIP1,BUB1,BUB1B,CBS,CCNA2,CCNB1,CCNB2,CCNE1,CDC20,CDC6,CDH1,CDH3,CHRDL1,CKS1B,CLDN3,CLDN4,CLDN7,CSE1L,CTSC,CTSL2,DMC1,DUT,EBPL,ENO1,ENPP1,EPCAM,EPHA1,ERBB2,ERBB3,ESPL1,ESRP1,ETV4,EXO1,F2RL1,FAM72D,FEN1,FOXM1,GAL,GALNT3,GLI1,GPX3,GRB7,GRM4,GSTP1,HMGA1,HMGA2,HMGN5,HMMR,HSP90AB1,IGF2BP3,ITGA6,ITPR3,KIF11,KIFC1,KRT19,KRT7,KRT8,LAD1,LAMC2,M6PR,MAP7D3,METAP1,MICB,MSH2,MSH6,MYB…	101
Reproductive System Disease	uterine cancer	3.37E-07	APOE,ARHGEF5,AURKA,BRCA2,BRIP1,BUB1,BUB1B,CBS,CCNA2,CCNB1,CCNB2,CCNE1,CDC20,CDC6,CDH1,CDH3,CHRDL1,CKS1B,CLDN3,CLDN4,CLDN7,CSE1L,CTSC,CTSL2,DMC1,DUT,EBPL,ENO1,ENPP1,EPCAM,EPHA1,ERBB2,ERBB3,ESPL1,ESRP1,ETV4,EXO1,F2RL1,FAM72D,FEN1,FOXM1,GAL,GALNT3,GLI1,GPX3,GRB7,GRM4,GSTP1,HMGA1,HMGA2,HMGN5,HMMR,HSP90AB1,IGF2BP3,ITGA6,ITPR3,KIF11,KIFC1,KRT19,KRT7,KRT8,LAD1,LAMC2,M6PR,MAP7D3,METAP1,MICB,MSH2,MSH6,MYB…	101
Cell Cycle	homologous recombination	4.82E-07	BLM,BRCA2,DMC1,HJURP,MMS22L,PARP1,PARPBP,RAD51,RAD54B,RAD54L,TONSL,TP53	12
DNA Replication, Recombination, and Repair	homologous recombination	4.82E-07	BLM,BRCA2,DMC1,HJURP,MMS22L,PARP1,PARPBP,RAD51,RAD54B,RAD54L,TONSL,TP53	12
Cell Cycle	DNA recombination	5.25E-07	BLM,BRCA2,DMC1,EXO1,HJURP,MMS22L,MSH2,MSH6,PARP1,PARPBP,RAD51,RAD54B,RAD54L,TONSL,TP53	15
DNA Replication, Recombination, and Repair	DNA recombination	5.25E-07	BLM,BRCA2,DMC1,EXO1,HJURP,MMS22L,MSH2,MSH6,PARP1,PARPBP,RAD51,RAD54B,RAD54L,TONSL,TP53	15
Cell Cycle	arrest in mitosis of tumor cell lines	8.42E-07	BIRC5,BUB1B,CCNE1,CENPE,CENPI,CHEK1,CSE1L,KIF22,PLK1,TP53,TTK	11
Cell Cycle	S phase	9.96E-07	BLM,CCNA2,CCNE1,CCNG1,CDC25A,CDC25C,CDC6,CDH1,CHEK1,CHEK2,CKS2,DBF4,DDX11,E2F8,ERBB2,FANCD2,FEN1,FOXM1,HMOX1,MCM10,MYBL2,MYC,NPM1,PLK1,POLA1,POLD1,PTPN6,TFAP4,TIMELESS,TIPIN,TP53	31
Cancer	endometrial carcinoma	1.29E-06	APOE,ARHGEF5,AURKA,BRCA2,BRIP1,BUB1,BUB1B,CBS,CCNA2,CCNB1,CCNB2,CCNE1,CDC20,CDC6,CDH1,CHRDL1,CKS1B,CLDN3,CLDN4,CLDN7,CSE1L,EBPL,ENPP1,EPCAM,EPHA1,ERBB2,ERBB3,ESPL1,ESRP1,ETV4,EXO1,F2RL1,FEN1,FOXM1,GAL,GALNT3,GLI1,GPX3,GRB7,GRM4,HMGA1,HMGA2,HMGN5,HMMR,IGF2BP3,ITPR3,KIF11,KIFC1,KRT7,KRT8,LAD1,LAMC2,M6PR,MAP7D3,METAP1,MICB,MSH2,MSH6,MYBL2,MYH14,NFE2L3,PHC1,PLK1,PMAIP1,PRSS8,PTTG1,SALL4,SCNN1A,SEL1L3…	84
Reproductive System Disease	endometrial carcinoma	1.29E-06	APOE,ARHGEF5,AURKA,BRCA2,BRIP1,BUB1,BUB1B,CBS,CCNA2,CCNB1,CCNB2,CCNE1,CDC20,CDC6,CDH1,CHRDL1,CKS1B,CLDN3,CLDN4,CLDN7,CSE1L,EBPL,ENPP1,EPCAM,EPHA1,ERBB2,ERBB3,ESPL1,ESRP1,ETV4,EXO1,F2RL1,FEN1,FOXM1,GAL,GALNT3,GLI1,GPX3,GRB7,GRM4,HMGA1,HMGA2,HMGN5,HMMR,IGF2BP3,ITPR3,KIF11,KIFC1,KRT7,KRT8,LAD1,LAMC2,M6PR,MAP7D3,METAP1,MICB,MSH2,MSH6,MYBL2,MYH14,NFE2L3,PHC1,PLK1,PMAIP1,PRSS8,PTTG1,SALL4,SCNN1A,SEL1L3…	84
Cell Cycle	delay in mitosis of cervical cancer cell lines	1.63E-06	CCNB1,CDC20,CDC25C,CENPE,DLGAP5,PKMYT1,PLK1,PTTG1	8
Cell Cycle	DNA replication checkpoint	2.19E-06	CDC45,CDC6,CDT1,CENPE,CHEK1,TIPIN	6
DNA Replication, Recombination, and Repair	DNA replication checkpoint	2.19E-06	CDC45,CDC6,CDT1,CENPE,CHEK1,TIPIN	6
Cellular Assembly and Organization	quantity of chromosome components	2.19E-06	BRCA2,MMS22L,RAD51,SGOL1,TONSL,TP53	6
DNA Replication, Recombination, and Repair	initiation of replication of DNA	2.20E-06	CCNE1,CDC6,CDT1,CHEK1,ORC1,POLA1,RPA3,TIMELESS,TIPIN	9
Cell Death and Survival	cell survival	3.10E-06	AEN,AGTRAP,ANLN,APOE,ARTN,AURKA,AURKB,BAX,BIRC5,BLM,BRCA2,BRIP1,BUB1B,CARD10,CBR1,CCNA2,CCNB1,CCNG1,CD40,CD74,CDH1,CHEK1,CHEK2,CLDN3,CLDN4,CYBA,DPP4,DUSP5,ELF3,ERBB2,ERBB3,FANCA,FANCD2,FKBP5,FLT1,FLT4,FOSL1,FOXM1,FOXO1,GLI1,GSTP1,HMGA1,HMGA2,HMOX1,HSPA4,HTATIP2,HYOU1,IKBKE,KIF11,KIFC1,KRT19,LAPTM4B,LCK,LDHA,LIG1,LYN,MGST1,MMS22L,MSH2,MTA3,MYBL2,MYC,NEK8,NUP210,PARP1,PDGFA,PIK3R2,PIM1,PLAU,PLK1,PM…	107
Cell Cycle	arrest in interphase of fibroblasts	3.44E-06	BLM,CCNB1,CDC25C,CHEK1,MYBL2,MYC,TP53	7
Cell Cycle	delay in mitosis	3.63E-06	CCNB1,CDC20,CDC25C,CENPE,DLGAP5,FOXM1,PKMYT1,PLK1,PTTG1	9
Cancer	genital tumor	4.76E-06	ACP5,ACTC1,AIM1,ALPL,ALYREF,AMD1,ANAPC1,APOE,ARHGEF5,AURKA,AURKB,BIRC5,BRCA2,BRIP1,CARD11,CCNB2,CCNF,CCT5,CD74,CDC25A,CDC25C,CDCA7L,CDH1,CDH3,CGN,CHEK2,CLDN3,CLDN4,CLDN7,COBL,COX5A,CTNNAL1,DHCR24,DPP4,EBPL,EIF2S3,EIF4EBP1,ELAC2,ENO1,EPCAM,ERBB2,ERBB3,ESRP1,ETV4,FAM124A,FAM136A,FAM72D,FANCD2,FEN1,FLT1,FLT4,FOSL1,GALNT3,GGT1,GINS1,GLDC,GLI1,GPX3,GRM4,GRPR,GSTP1,HLA-A,HMGA1,HMGA2,HMGN5,HMOX1,HOOK2,H…	140
Reproductive System Disease	genital tumor	4.76E-06	ACP5,ACTC1,AIM1,ALPL,ALYREF,AMD1,ANAPC1,APOE,ARHGEF5,AURKA,AURKB,BIRC5,BRCA2,BRIP1,CARD11,CCNB2,CCNF,CCT5,CD74,CDC25A,CDC25C,CDCA7L,CDH1,CDH3,CGN,CHEK2,CLDN3,CLDN4,CLDN7,COBL,COX5A,CTNNAL1,DHCR24,DPP4,EBPL,EIF2S3,EIF4EBP1,ELAC2,ENO1,EPCAM,ERBB2,ERBB3,ESRP1,ETV4,FAM124A,FAM136A,FAM72D,FANCD2,FEN1,FLT1,FLT4,FOSL1,GALNT3,GGT1,GINS1,GLDC,GLI1,GPX3,GRM4,GRPR,GSTP1,HLA-A,HMGA1,HMGA2,HMGN5,HMOX1,HOOK2,H…	140
Cell Cycle	G2 phase of tumor cell lines	4.78E-06	BAX,CCNA2,CCNB1,CDC25A,CDC25C,CHEK1,CHEK2,CSE1L,DPP4,FOXM1,GMNN,MASTL,MSH2,NPM1,PLAU,PLK1,PRDM5,RRM2B,TERF1,TP53,TRAF2,WEE1	22
Cell Death and Survival	cell viability	5.21E-06	AEN,AGTRAP,ANLN,APOE,ARTN,AURKA,AURKB,BAX,BIRC5,BLM,BRCA2,BRIP1,BUB1B,CARD10,CBR1,CCNA2,CCNB1,CCNG1,CD40,CD74,CDH1,CHEK1,CHEK2,CLDN3,CLDN4,CYBA,DPP4,DUSP5,ELF3,ERBB2,ERBB3,FANCA,FANCD2,FKBP5,FLT1,FLT4,FOSL1,FOXM1,FOXO1,GLI1,GSTP1,HMGA1,HMGA2,HMOX1,HTATIP2,HYOU1,IKBKE,KIF11,KIFC1,KRT19,LCK,LDHA,LIG1,LYN,MGST1,MMS22L,MSH2,MTA3,MYBL2,MYC,NEK8,NUP210,PARP1,PDGFA,PIK3R2,PIM1,PLAU,PLK1,PMAIP1,POU5F1,PP…	102
Cell Cycle	arrest in G2 phase of fibroblasts	6.20E-06	CCNB1,CDC25C,CHEK1,MYBL2,MYC,TP53	6
Connective Tissue Development and Function	arrest in G2 phase of fibroblasts	6.20E-06	CCNB1,CDC25C,CHEK1,MYBL2,MYC,TP53	6
Cell Cycle	cytokinesis	6.44E-06	ANLN,AURKA,AURKB,BIRC5,BRCA2,CCNB1,CD2AP,CDC20,DIAPH2,DIAPH3,KIF14,KIF20A,KIF20B,KIF23,KIFC1,MASTL,MYH14,NPM1,PFN1,PIM1,PLK1,TP53	22
Cellular Movement	cytokinesis	6.44E-06	ANLN,AURKA,AURKB,BIRC5,BRCA2,CCNB1,CD2AP,CDC20,DIAPH2,DIAPH3,KIF14,KIF20A,KIF20B,KIF23,KIFC1,MASTL,MYH14,NPM1,PFN1,PIM1,PLK1,TP53	22
Cell Cycle	S phase checkpoint control	7.01E-06	CDC25A,CHEK1,CKS1B,CKS2,DBF4,FANCD2,TIPIN	7
DNA Replication, Recombination, and Repair	S phase checkpoint control	7.01E-06	CDC25A,CHEK1,CKS1B,CKS2,DBF4,FANCD2,TIPIN	7
Cell Cycle	spindle checkpoint of tumor cell lines	7.01E-06	BIRC5,CDT1,CENPI,DLGAP5,ERCC6L,MASTL,PLK1	7
DNA Replication, Recombination, and Repair	spindle checkpoint of tumor cell lines	7.01E-06	BIRC5,CDT1,CENPI,DLGAP5,ERCC6L,MASTL,PLK1	7
Cell Cycle	homologous recombination of cells	7.49E-06	BRCA2,MMS22L,PARPBP,RAD51,TONSL	5
DNA Replication, Recombination, and Repair	homologous recombination of cells	7.49E-06	BRCA2,MMS22L,PARPBP,RAD51,TONSL	5
Cell Cycle	entry into mitosis	8.93E-06	AURKA,CCNB1IP1,CDC25A,CDC25C,CHEK1,CHEK2,MATK,PKMYT1,TP53	9
Cell Cycle	interphase of fibroblasts	9.27E-06	BLM,CCNB1,CDC25C,CHEK1,CHEK2,MYBL2,MYC,TP53	8
DNA Replication, Recombination, and Repair	repair of DNA	1.18E-05	BLM,BRCA2,CDCA5,CHEK1,CHEK2,DDB2,DEK,DNA2,ERBB2,EXO1,FANCI,FEN1,HMGA1,HMGA2,HMOX1,LIG1,MAD2L2,MSH2,MSH6,NPM1,PARP1,POLA1,POLD1,POLE,RAD51,RAD54B,RAD54L,TERT,TP53,XRCC2,XRCC5	31
Cell Death and Survival	cell viability of tumor cell lines	1.22E-05	AEN,AGTRAP,ANLN,AURKA,AURKB,BAX,BIRC5,BLM,BRCA2,BRIP1,BUB1B,CARD10,CBR1,CCNA2,CCNB1,CCNG1,CDH1,CHEK1,CHEK2,CLDN3,CLDN4,CYBA,DPP4,DUSP5,ELF3,ERBB2,ERBB3,FANCA,FKBP5,FLT1,FLT4,FOSL1,FOXM1,GLI1,GSTP1,HMGA1,HMGA2,HMOX1,HTATIP2,IKBKE,KIF11,KIFC1,KRT19,LCK,LIG1,LYN,MMS22L,MSH2,MTA3,MYC,NEK8,NUP210,PARP1,PIK3R2,PIM1,PLAU,PLK1,PMAIP1,POU5F1,PPAP2A,PPAT,PPP2R5A,PRKCD,PYCARD,RAD51,ROR1,RRM2,RRM2B,SKA1,SKA3…	83
Cell Cycle	interphase of lymphoma cell lines	1.32E-05	CD40,FOXM1,FOXO1,MYC,PTPN6,TFRC,TP53	7
Cell Cycle	cell cycle progression of tumor cell lines	1.36E-05	AURKA,AURKB,BAX,BIRC5,CARD10,CCNA2,CCNE1,CCNG1,CDC25C,CLSPN,CSE1L,EPCAM,ERBB2,FANCA,FOXM1,HMOX1,KRT19,LIG1,LIN28A,LYN,MELK,MMS22L,MYC,NPM1,PHB,PLK1,POLD1,POU5F1,PRKCD,SRSF2,TERT,TP53,WEE1	33
Cell Cycle	M phase of tumor cell lines	1.69E-05	AURKB,BIRC5,CCNE1,CD2AP,CDT1,DIAPH3,KIF14,KIF20A,KIF20B,KIF23,KIFC1,MASTL,MYH14,NPM1,PLK1,PTTG1,TERF1,TP53	18
Cancer	chronic B-cell leukemia	1.72E-05	BAX,CD55,CD74,DPP4,ITGA6,LCK,LDHA,LSM3,LYN,PIM2,PLCG2,POLA1,POLE,POLE2,PRIM1,ROR1,RRM2,RRM2B,SNRPD3,TNFRSF10A,TNFSF11,TP53	22
Hematological Disease	chronic B-cell leukemia	1.72E-05	BAX,CD55,CD74,DPP4,ITGA6,LCK,LDHA,LSM3,LYN,PIM2,PLCG2,POLA1,POLE,POLE2,PRIM1,ROR1,RRM2,RRM2B,SNRPD3,TNFRSF10A,TNFSF11,TP53	22
Immunological Disease	chronic B-cell leukemia	1.72E-05	BAX,CD55,CD74,DPP4,ITGA6,LCK,LDHA,LSM3,LYN,PIM2,PLCG2,POLA1,POLE,POLE2,PRIM1,ROR1,RRM2,RRM2B,SNRPD3,TNFRSF10A,TNFSF11,TP53	22
Cellular Growth and Proliferation	proliferation of lymphoma cell lines	1.79E-05	AURKB,BIRC5,CCNB1,CD40,FOXM1,FOXO1,GGT1,GLI1,IDO1,LDHA,MYC,NR2F6,PRODH,PTPN6,PYGM,RAD51,TERT,TFRC,TNFRSF8,TP53	20
Cellular Development	proliferation of lymphoma cell lines	1.79E-05	AURKB,BIRC5,CCNB1,CD40,FOXM1,FOXO1,GGT1,GLI1,IDO1,LDHA,MYC,NR2F6,PRODH,PTPN6,PYGM,RAD51,TERT,TFRC,TNFRSF8,TP53	20
Cancer	chromosomal congression of tumor cell lines	1.99E-05	BIRC5,DLGAP5,SKA1,SKA3	4
Cell Cycle	premature senescence of fibroblasts	1.99E-05	MYBL2,NPM1,TERT,TP53	4
Connective Tissue Development and Function	premature senescence of fibroblasts	1.99E-05	MYBL2,NPM1,TERT,TP53	4
Cellular Development	premature senescence of fibroblasts	1.99E-05	MYBL2,NPM1,TERT,TP53	4
Cellular Assembly and Organization	separation of sister chromatids	1.99E-05	DDX11,FEN1,PTTG1,SGOL1	4
Cancer	non-small cell lung cancer	2.20E-05	ANLN,ATIC,AURKA,AURKB,BAX,BIRC5,BRCA2,CBLC,CCNA2,CCNB1,CDH1,ENO1,ERBB2,ERBB3,FLT1,FLT4,FOXM1,GART,GLDC,GSTP1,HSPD1,IKBKE,ITGB5,LCK,LIN28B,MSH2,MTAP,PLAU,POLE,POLE2,PRR13,RRM2,SLC29A1,SLC7A5,TEK,TERF1,TERT,TP53,TUBA4A,UMPS,UNG,XRCC5	42
Respiratory Disease	non-small cell lung cancer	2.20E-05	ANLN,ATIC,AURKA,AURKB,BAX,BIRC5,BRCA2,CBLC,CCNA2,CCNB1,CDH1,ENO1,ERBB2,ERBB3,FLT1,FLT4,FOXM1,GART,GLDC,GSTP1,HSPD1,IKBKE,ITGB5,LCK,LIN28B,MSH2,MTAP,PLAU,POLE,POLE2,PRR13,RRM2,SLC29A1,SLC7A5,TEK,TERF1,TERT,TP53,TUBA4A,UMPS,UNG,XRCC5	42
Cellular Assembly and Organization	missegregation of chromosomes	3.03E-05	AURKB,CCNE1,ERCC6L,PIM1,TP53,TTK	6
Cell Cycle	interphase of bone cancer cell lines	3.36E-05	CCNA2,CCNE1,CDC25A,CHEK1,FOXM1,GJA1,GNL3,MYBL2,MYC,ORC3,PLK1,TP53,WEE1	13
Cancer	biliary tract cancer	3.99E-05	ACY1,ALPL,BIRC5,BRCA2,EPCAM,ERBB2,ERBB3,HSP90AB1,PLAU,POLE,POLE2,RPL13A,RPL9,RRM2,TP53	15
Gastrointestinal Disease	biliary tract cancer	3.99E-05	ACY1,ALPL,BIRC5,BRCA2,EPCAM,ERBB2,ERBB3,HSP90AB1,PLAU,POLE,POLE2,RPL13A,RPL9,RRM2,TP53	15
Hepatic System Disease	biliary tract cancer	3.99E-05	ACY1,ALPL,BIRC5,BRCA2,EPCAM,ERBB2,ERBB3,HSP90AB1,PLAU,POLE,POLE2,RPL13A,RPL9,RRM2,TP53	15
Cell Death and Survival	cell death of tumor cell lines	4.23E-05	A4GALT,ABCE1,ADM,APOE,ARHGAP4,AURKA,BAX,BIRC5,BLM,BRCA2,BUB1B,CABLES1,CBR1,CCNB1,CCNE1,CCNG1,CD4,CD40,CD55,CDC20,CDC25A,CDC25C,CDC6,CDCA2,CDCP1,CDH1,CHEK1,CHEK2,CIDEB,COX5A,CSE1L,CYB5A,CYCS,DEK,DEPDC1,DHCR24,DPP4,DSG2,DUT,EGLN3,EIF4EBP1,ENO1,ERBB2,ERBB3,EZR,FANCA,FKBP5,FLT1,FOXO1,FST,GAL,GGT1,GLI1,GRHL2,GSTP1,HMGA1,HMMR,HMOX1,HPN,HSP90AB1,HSPA4,HSPD1,HTATIP2,ICMT,IDO1,IGF2BP1,IKBKE,IQGAP2,ITPK1,K…	140
DNA Replication, Recombination, and Repair	synthesis of DNA	4.39E-05	APOE,BIRC5,BRCA2,CCNA2,CD40,CDC25A,CDC25C,CDCA4,CDT1,CHEK1,CHEK2,ERBB2,EXO1,FEN1,FGFR4,FLT1,GLI1,LIG1,MMS22L,MYC,PLK1,POLA1,POLD1,POLE,PPAT,RFC2,SALL2,SDC4,SLC29A1,TDGF1,TERT,TIPIN,TP53	33
Cell Cycle	arrest in interphase of lymphoma cell lines	5.72E-05	CD40,FOXM1,FOXO1,MYC,TFRC,TP53	6
Cell Cycle	recombination of cells	5.72E-05	BRCA2,MMS22L,PARPBP,RAD51,RAD54B,TONSL	6
DNA Replication, Recombination, and Repair	recombination of cells	5.72E-05	BRCA2,MMS22L,PARPBP,RAD51,RAD54B,TONSL	6
Cancer	diffuse lymphoma	5.77E-05	CARD11,EIF4EBP1,KDM2B,MYC,PIM1,PIM2,POLA1,POLD1,POLE,ROR1,SALL3,SLC29A2,SOCS1,TCF7L1,TNFRSF10A,TNFSF11,TP53,TPST2	18
Hematological Disease	diffuse lymphoma	5.77E-05	CARD11,EIF4EBP1,KDM2B,MYC,PIM1,PIM2,POLA1,POLD1,POLE,ROR1,SALL3,SLC29A2,SOCS1,TCF7L1,TNFRSF10A,TNFSF11,TP53,TPST2	18
Cell Cycle	spindle checkpoint of cervical cancer cell lines	6.24E-05	CDT1,CENPI,DLGAP5,ERCC6L,MASTL	5
DNA Replication, Recombination, and Repair	spindle checkpoint of cervical cancer cell lines	6.24E-05	CDT1,CENPI,DLGAP5,ERCC6L,MASTL	5
Cancer	chronic leukemia	6.33E-05	BAX,CD55,CD74,CDCP1,DPP4,FOXO1,ITGA6,LCK,LDHA,LSM3,LYN,NPM1,PIM2,PLCG2,POLA1,POLE,POLE2,PRIM1,ROR1,RRM2,RRM2B,SNRPD3,SRSF2,TEK,TNFRSF10A,TNFSF11,TP53	27
Hematological Disease	chronic leukemia	6.33E-05	BAX,CD55,CD74,CDCP1,DPP4,FOXO1,ITGA6,LCK,LDHA,LSM3,LYN,NPM1,PIM2,PLCG2,POLA1,POLE,POLE2,PRIM1,ROR1,RRM2,RRM2B,SNRPD3,SRSF2,TEK,TNFRSF10A,TNFSF11,TP53	27
Cell Cycle	G2 phase of cervical cancer cell lines	7.60E-05	CCNA2,CCNB1,CDC25A,CDC25C,CHEK1,CSE1L,MASTL,PLK1,TERF1	9
Cell Cycle	regulation of cyclin-dependent protein kinase	7.60E-05	BLM,CCNG1,CDC25A,CDC25C,CDC6,CKS1B,CKS2,HERC5,PKMYT1	9
Post-Translational Modification	regulation of cyclin-dependent protein kinase	7.60E-05	BLM,CCNG1,CDC25A,CDC25C,CDC6,CKS1B,CKS2,HERC5,PKMYT1	9
Tissue Development	accumulation of cells	7.97E-05	AURKA,BIRC5,BUB1B,CTSC,ERBB2,FEN1,GMNN,HMOX1,MCM10,PLK1,PTTG1,RAD51,TP53,WEE1	14
Gastrointestinal Disease	Meier-Gorlin syndrome	9.40E-05	CDC6,CDT1,ORC1,ORC6	4
Connective Tissue Disorders	Meier-Gorlin syndrome	9.40E-05	CDC6,CDT1,ORC1,ORC6	4
Dental Disease	Meier-Gorlin syndrome	9.40E-05	CDC6,CDT1,ORC1,ORC6	4
Developmental Disorder	Meier-Gorlin syndrome	9.40E-05	CDC6,CDT1,ORC1,ORC6	4
Neurological Disease	Meier-Gorlin syndrome	9.40E-05	CDC6,CDT1,ORC1,ORC6	4
Organismal Injury and Abnormalities	Meier-Gorlin syndrome	9.40E-05	CDC6,CDT1,ORC1,ORC6	4
Skeletal and Muscular Disorders	Meier-Gorlin syndrome	9.40E-05	CDC6,CDT1,ORC1,ORC6	4
Cellular Growth and Proliferation	proliferation of tumor cell lines	9.46E-05	ADM,AURKA,AURKB,BAX,BIRC5,BRCA2,BUB1,C1QBP,CABLES1,CARD10,CCKBR,CCNA2,CCNB1,CCNE1,CD4,CD40,CDC25A,CDCA2,CDCA4,CDCA5,CDCP1,CDH1,CDT1,CHEK1,CHEK2,CKS1B,CSE1L,DDB2,DDX21,DLGAP5,DNMT3B,DPP4,DTL,DUSP5,E2F8,EIF5A,ELF3,EPCAM,EPHA1,ERBB2,ERBB3,F2RL1,FABP5,FANCA,FEN1,FGF19,FGFR4,FKBP5,FLT1,FOSL1,FOXM1,FOXO1,FST,GAL,GDF3,GGT1,GJA1,GLDC,GLI1,GMNN,GRB7,H2AFZ,HAS3,HMGA1,HMGA2,HMMR,HMOX1,HPN,HTATIP2,IDO1,IGF2B…	141
Cellular Development	proliferation of tumor cell lines	9.46E-05	ADM,AURKA,AURKB,BAX,BIRC5,BRCA2,BUB1,C1QBP,CABLES1,CARD10,CCKBR,CCNA2,CCNB1,CCNE1,CD4,CD40,CDC25A,CDCA2,CDCA4,CDCA5,CDCP1,CDH1,CDT1,CHEK1,CHEK2,CKS1B,CSE1L,DDB2,DDX21,DLGAP5,DNMT3B,DPP4,DTL,DUSP5,E2F8,EIF5A,ELF3,EPCAM,EPHA1,ERBB2,ERBB3,F2RL1,FABP5,FANCA,FEN1,FGF19,FGFR4,FKBP5,FLT1,FOSL1,FOXM1,FOXO1,FST,GAL,GDF3,GGT1,GJA1,GLDC,GLI1,GMNN,GRB7,H2AFZ,HAS3,HMGA1,HMGA2,HMMR,HMOX1,HPN,HTATIP2,IDO1,IGF2B…	141
Cancer	metastasis	9.63E-05	AIM1,ALPL,APOE,CD9,CDC25A,CDCA7L,CLDN3,CLDN4,CSE1L,DLGAP5,DSG2,ERBB2,FGFR4,FLT1,FLT4,FOXM1,FST,FZD7,GART,GLI1,GYG2,HMOX1,HTATIP2,ITPR3,KIF20A,LGR4,MLPH,OLFML3,PDGFA,PLAU,POLE,POLE2,RPS6KA1,RRM2,SCN5A,SEL1L3,SLC12A8,STEAP3,TEK,TNFRSF10A,TNFSF11,TOP1MT,TP53,TUBA4A	44
Cell Cycle	checkpoint control of tumor cell lines	9.66E-05	CDC25A,CHEK1,CHEK2,CKS2,DBF4,TERF1,TIPIN	7
DNA Replication, Recombination, and Repair	checkpoint control of tumor cell lines	9.66E-05	CDC25A,CHEK1,CHEK2,CKS2,DBF4,TERF1,TIPIN	7
DNA Replication, Recombination, and Repair	re-replication of DNA	1.00E-04	CCNA2,CDC6,CDT1,DBF4,GMNN,TP53	6
Cell Cycle	ploidy	1.10E-04	AURKA,AURKB,BIRC5,BUB1B,CCNA2,CENPH,CKS1B,ERBB2,MST4,PIM1,PLK1,TACC3,TERT,TP53,XRCC5	15
Cell Cycle	arrest in G2 phase of tumor cell lines	1.11E-04	CCNA2,CCNB1,CDC25C,CHEK1,CHEK2,CSE1L,DPP4,FOXM1,MASTL,MSH2,PLAU,PLK1,PRDM5,RRM2B,TP53,TRAF2,WEE1	17
Cancer	bile duct cancer	1.11E-04	ACY1,ALPL,EPCAM,ERBB2,ERBB3,HSP90AB1,PLAU,POLE,POLE2,RPL13A,RPL9,RRM2,TP53	13
Gastrointestinal Disease	bile duct cancer	1.11E-04	ACY1,ALPL,EPCAM,ERBB2,ERBB3,HSP90AB1,PLAU,POLE,POLE2,RPL13A,RPL9,RRM2,TP53	13
Hepatic System Disease	bile duct cancer	1.11E-04	ACY1,ALPL,EPCAM,ERBB2,ERBB3,HSP90AB1,PLAU,POLE,POLE2,RPL13A,RPL9,RRM2,TP53	13
Cell Cycle	arrest in G2/M phase	1.12E-04	AURKA,CDC25C,CHEK1,CHEK2,CSE1L,FOXM1,MYBL2,PRDM5,TP53,TRAF2,WEE1	11
Cell Cycle	interphase of tumor cell lines	1.25E-04	BAX,CCNA2,CCNB1,CCNE1,CCNG1,CD40,CDC25A,CDC25C,CDCA2,CDH1,CHEK1,CHEK2,CSE1L,DPP4,E2F8,ERBB2,ERBB3,FOXM1,FOXO1,GJA1,GMNN,GNL3,HMGA1,HMOX1,MASTL,MCM10,MSH2,MYBL2,MYC,NASP,NPM1,ORC3,PLAU,PLK1,POLA1,PRDM5,PTPN6,RRM2B,TERF1,TFRC,TP53,TRAF2,WEE1	43
Cancer	B-cell leukemia	1.26E-04	BAX,CD55,CD74,DPP4,ITGA6,LCK,LDHA,LSM3,LYN,MYC,PIM2,PLCG2,POLA1,POLE,POLE2,PRIM1,ROR1,RRM2,RRM2B,SNRPD3,TNFRSF10A,TNFSF11,TP53	23
Hematological Disease	B-cell leukemia	1.26E-04	BAX,CD55,CD74,DPP4,ITGA6,LCK,LDHA,LSM3,LYN,MYC,PIM2,PLCG2,POLA1,POLE,POLE2,PRIM1,ROR1,RRM2,RRM2B,SNRPD3,TNFRSF10A,TNFSF11,TP53	23
Immunological Disease	B-cell leukemia	1.26E-04	BAX,CD55,CD74,DPP4,ITGA6,LCK,LDHA,LSM3,LYN,MYC,PIM2,PLCG2,POLA1,POLE,POLE2,PRIM1,ROR1,RRM2,RRM2B,SNRPD3,TNFRSF10A,TNFSF11,TP53	23
Cell Cycle	G2/M phase of colon cancer cell lines	1.33E-04	CHEK1,CHEK2,GMNN,NPM1,WEE1	5
DNA Replication, Recombination, and Repair	chromosomal congression of chromosomes	1.33E-04	AURKB,CENPE,KIF14,KIF22,KIFC1	5
Cellular Assembly and Organization	chromosomal congression of chromosomes	1.33E-04	AURKB,CENPE,KIF14,KIF22,KIFC1	5
Cell Death and Survival	cell death of cancer cells	1.33E-04	BAX,BIRC5,BUB1B,CD40,CD74,CDC45,CDC6,CDH1,CHEK1,DNMT3B,ENO1,ERBB2,GLI1,HMOX1,MYC,PARP1,PLK1,PMAIP1,PRKCD,RPS6KA1,SFRP1,SLC16A1,TERT,TNFRSF10A,TP53	25
Tumor Morphology	cell death of cancer cells	1.33E-04	BAX,BIRC5,BUB1B,CD40,CD74,CDC45,CDC6,CDH1,CHEK1,DNMT3B,ENO1,ERBB2,GLI1,HMOX1,MYC,PARP1,PLK1,PMAIP1,PRKCD,RPS6KA1,SFRP1,SLC16A1,TERT,TNFRSF10A,TP53	25
Cell Cycle	arrest in interphase	1.43E-04	AURKA,BIRC5,BLM,CCNA2,CCNB1,CCNE1,CCNG1,CD40,CDC25A,CDC25C,CDC6,CDCA2,CHEK1,CHEK2,CSE1L,DPP4,ERBB2,FANCD2,FOXM1,FOXO1,GMNN,GNL3,MASTL,MMS22L,MSH2,MYBL2,MYC,ORC3,PIM1,PLAU,PLK1,PRDM5,RRM2B,TERT,TFRC,TONSL,TP53,TRAF2,WEE1	39
Tissue Development	accumulation of tumor cell lines	1.44E-04	AURKA,BIRC5,ERBB2,GMNN,HMOX1,MCM10,PLK1,PTTG1,TP53,WEE1	10
Cancer	gonadal tumor	1.69E-04	ACP5,ALYREF,APOE,ARHGEF5,BRCA2,BRIP1,CCNB2,CCT5,CDH1,CHEK2,CLDN3,CLDN4,CLDN7,COX5A,CTNNAL1,DHCR24,DPP4,EBPL,ENO1,EPCAM,ERBB2,ERBB3,ESRP1,ETV4,FAM72D,FLT1,FLT4,FOSL1,GINS1,GLDC,GLI1,GPX3,GRM4,GSTP1,HMGA1,HMGA2,HMGN5,HPS3,HSP90AB1,IDO1,IGF2BP3,ITPR3,KCNK6,KIAA0101,KRT19,KRT8,LCK,LDHA,LIN28A,M6PR,MAP7D3,METAP1,MSH2,MSH6,MTFR2,MTHFD2,MYBL2,MYH14,OCLN,PAWR,PDPN,PHC1,PLAU,POLE,POLE2,PPAP2A,PRDM14,PSAT1…	79
Reproductive System Disease	gonadal tumor	1.69E-04	ACP5,ALYREF,APOE,ARHGEF5,BRCA2,BRIP1,CCNB2,CCT5,CDH1,CHEK2,CLDN3,CLDN4,CLDN7,COX5A,CTNNAL1,DHCR24,DPP4,EBPL,ENO1,EPCAM,ERBB2,ERBB3,ESRP1,ETV4,FAM72D,FLT1,FLT4,FOSL1,GINS1,GLDC,GLI1,GPX3,GRM4,GSTP1,HMGA1,HMGA2,HMGN5,HPS3,HSP90AB1,IDO1,IGF2BP3,ITPR3,KCNK6,KIAA0101,KRT19,KRT8,LCK,LDHA,LIN28A,M6PR,MAP7D3,METAP1,MSH2,MSH6,MTFR2,MTHFD2,MYBL2,MYH14,OCLN,PAWR,PDPN,PHC1,PLAU,POLE,POLE2,PPAP2A,PRDM14,PSAT1…	79
Cancer	cell viability of cancer cells	1.82E-04	CD40,CD74,GLI1,HMOX1,PLK1,RPS6KA1,SFRP1,SLC16A1,TERT,TP53	10
Cell Death and Survival	cell viability of cancer cells	1.82E-04	CD40,CD74,GLI1,HMOX1,PLK1,RPS6KA1,SFRP1,SLC16A1,TERT,TP53	10
Tumor Morphology	cell viability of cancer cells	1.82E-04	CD40,CD74,GLI1,HMOX1,PLK1,RPS6KA1,SFRP1,SLC16A1,TERT,TP53	10
Cell Cycle	G2/M phase of tumor cell lines	1.86E-04	CDC25A,CDC25C,CHEK1,CHEK2,CSE1L,FOXM1,GMNN,MSH2,NPM1,PRDM5,TRAF2,WEE1	12
Cell Death and Survival	apoptosis of tumor cell lines	1.89E-04	A4GALT,ABCE1,ADM,ARHGAP4,AURKA,BAX,BIRC5,BLM,BRCA2,CCNB1,CCNE1,CCNG1,CD4,CD40,CD55,CDC20,CDC25A,CDC6,CDCA2,CDCP1,CDH1,CHEK1,CHEK2,CIDEB,COX5A,CSE1L,CYB5A,CYCS,DEPDC1,DPP4,DSG2,DUT,EIF4EBP1,ENO1,ERBB2,ERBB3,EZR,FANCA,FKBP5,FLT1,FOXO1,FST,GAL,GGT1,GLI1,GRHL2,GSTP1,HMGA1,HMMR,HMOX1,HPN,HSP90AB1,HSPA4,HSPD1,HTATIP2,IDO1,IGF2BP1,IKBKE,ITPK1,KIF14,LCK,LIG1,LYN,MCM10,MELK,MST4,MTFP1,MYC,NACC1,NANOG,NCL,…	115
Cell Cycle	interphase of cervical cancer cell lines	1.90E-04	CCNA2,CCNB1,CDC25A,CDC25C,CHEK1,CSE1L,FOXM1,MASTL,MCM10,NASP,PLK1,POLA1,TERF1	13
Cell Cycle	cell cycle progression of cervical cancer cell lines	2.05E-04	AURKA,BIRC5,CCNA2,CDC25C,CSE1L,MMS22L,NPM1,PLK1	8
Cancer	clear-cell ovarian carcinoma	2.05E-04	APOE,CLDN3,CLDN7,EPCAM,GPX3,HMGA2,SPINT2,WFDC2	8
Reproductive System Disease	clear-cell ovarian carcinoma	2.05E-04	APOE,CLDN3,CLDN7,EPCAM,GPX3,HMGA2,SPINT2,WFDC2	8
Endocrine System Disorders	clear-cell ovarian carcinoma	2.05E-04	APOE,CLDN3,CLDN7,EPCAM,GPX3,HMGA2,SPINT2,WFDC2	8
Cell Cycle	arrest in mitosis of cervical cancer cell lines	2.09E-04	BIRC5,CENPE,CENPI,CSE1L,KIF22,PLK1,TTK	7
Cell Cycle	G1/S phase	2.28E-04	BCAT1,BIRC5,CCNE1,CDC25A,CDC6,CDCA5,CHEK2,EIF4EBP1,ERBB2,ERBB3,FOXM1,GJA1,GMNN,HMGA1,MX2,MYC,NASP,POLE,RCC1,TP53	20
Cell Cycle	S phase checkpoint control of tumor cell lines	2.51E-04	CDC25A,CHEK1,CKS2,DBF4,TIPIN	5
DNA Replication, Recombination, and Repair	S phase checkpoint control of tumor cell lines	2.51E-04	CDC25A,CHEK1,CKS2,DBF4,TIPIN	5
Cell Morphology	multinucleation of cervical cancer cell lines	2.51E-04	CCNE1,DIAPH3,KIF14,KIF23,TP53	5
Cellular Compromise	multinucleation of cervical cancer cell lines	2.51E-04	CCNE1,DIAPH3,KIF14,KIF23,TP53	5
Cell Cycle	polyploidization of cells	2.51E-04	AURKB,BIRC5,BUB1B,PIM1,XRCC5	5
Nucleic Acid Metabolism	metabolism of nucleic acid component or derivative	2.55E-04	ACTC1,ADCY2,ADM,ADSL,ADSS,AK4,AMPD3,APOE,ATIC,BLM,CCNB1,DNA2,DUT,ENPP1,GAL,GDA,GLDC,HMOX1,HPRT1,HSPD1,HTR1A,KIF20B,MSH2,MSH6,MTAP,NPR1,NUDT1,PNP,PPAT,PRPS2,REXO2,SLC25A13,SLC29A1,SLC29A2,TK1,TNNT2,TP53,UGP2,UMPS,UPP1	40
DNA Replication, Recombination, and Repair	formation of nuclear foci	2.60E-04	BLM,CHEK1,GMNN,MMS22L,TONSL,TP53	6
Cellular Assembly and Organization	formation of nuclear foci	2.60E-04	BLM,CHEK1,GMNN,MMS22L,TONSL,TP53	6
Protein Synthesis	polymerization of protein	2.66E-04	AASS,ADSL,BAX,BLM,EHD4,GPX3,HMOX1,HPRT1,NACC1,NPM1,PFN1,PMAIP1,RAD51,SHMT1,STOM,TEK,TERF1,TK1,TP53	19
Cell Cycle	senescence of cells	2.66E-04	BLM,BUB1,CHEK2,CHRDL1,DDB2,DEK,EIF4EBP1,ERBB2,FLT1,HJURP,LIG1,MYBL2,MYC,NPM1,NUDT1,PARP1,SRSF2,TERT,TP53	19
Cell Cycle	S phase checkpoint control of cervical cancer cell lines	2.67E-04	CDC25A,CHEK1,DBF4,TIPIN	4
DNA Replication, Recombination, and Repair	S phase checkpoint control of cervical cancer cell lines	2.67E-04	CDC25A,CHEK1,DBF4,TIPIN	4
Cellular Assembly and Organization	binding of chromosome components	2.74E-04	CCNE1,CDC6,CDT1,GMNN,MYC,PHB,SUV39H1,TERT	8
DNA Replication, Recombination, and Repair	DNA damage	2.78E-04	BAX,BIRC5,CENPE,GMNN,GSTP1,LIG1,MCM10,MYC,PARP1,PLK1,PTPN6,RRM2,TERT,TNFSF11,TP53,XRCC5	16
Cell Cycle	arrest in G2/M phase transition	2.84E-04	BLM,CCNA2,CCNB1,CDC25C,DPP4,FANCD2,PLAU,RRM2B,TERT,TP53	10
Cell Death and Survival	cell death of tumor cells	2.93E-04	BAX,BIRC5,BUB1B,CD40,CD74,CDC45,CDC6,CDH1,CHEK1,DNMT3B,ENO1,ERBB2,FOXO1,GLI1,HMGA2,HMOX1,MYC,PARP1,PLK1,PMAIP1,PRKCD,RPS6KA1,SFRP1,SLC16A1,TERT,TNFRSF10A,TP53	27
Tumor Morphology	cell death of tumor cells	2.93E-04	BAX,BIRC5,BUB1B,CD40,CD74,CDC45,CDC6,CDH1,CHEK1,DNMT3B,ENO1,ERBB2,FOXO1,GLI1,HMGA2,HMOX1,MYC,PARP1,PLK1,PMAIP1,PRKCD,RPS6KA1,SFRP1,SLC16A1,TERT,TNFRSF10A,TP53	27
Cellular Assembly and Organization	binding of chromatin	2.96E-04	CCNE1,CDC6,CDT1,GMNN,MYC,PHB,SUV39H1	7
Cancer	gallbladder cancer	2.96E-04	BIRC5,ERBB2,ERBB3,POLE,POLE2,RRM2,TP53	7
Gastrointestinal Disease	gallbladder cancer	2.96E-04	BIRC5,ERBB2,ERBB3,POLE,POLE2,RRM2,TP53	7
Hepatic System Disease	gallbladder cancer	2.96E-04	BIRC5,ERBB2,ERBB3,POLE,POLE2,RRM2,TP53	7
Cancer	mantle cell lymphoma	2.96E-04	EIF4EBP1,PIM1,PIM2,ROR1,TNFRSF10A,TNFSF11,TP53	7
Hematological Disease	mantle cell lymphoma	2.96E-04	EIF4EBP1,PIM1,PIM2,ROR1,TNFRSF10A,TNFSF11,TP53	7
Cancer	chromosomal congression of cervical cancer cell lines	2.98E-04	DLGAP5,SKA1,SKA3	3
Reproductive System Disease	chromosomal congression of cervical cancer cell lines	2.98E-04	DLGAP5,SKA1,SKA3	3
Amino Acid Metabolism	metabolism of L-tetrahydrofolic acid	2.98E-04	MTHFD1L,MTHFD2,MTHFS	3
Small Molecule Biochemistry	metabolism of L-tetrahydrofolic acid	2.98E-04	MTHFD1L,MTHFD2,MTHFS	3
Vitamin and Mineral Metabolism	metabolism of L-tetrahydrofolic acid	2.98E-04	MTHFD1L,MTHFD2,MTHFS	3
Cellular Assembly and Organization	organization of asters	2.98E-04	EZR,KIF11,KIFC1	3
Cellular Function and Maintenance	organization of asters	2.98E-04	EZR,KIF11,KIFC1	3
Cancer	survival of melanoma cells	2.98E-04	RPS6KA1,TERT,TP53	3
Cell Death and Survival	survival of melanoma cells	2.98E-04	RPS6KA1,TERT,TP53	3
Tumor Morphology	survival of melanoma cells	2.98E-04	RPS6KA1,TERT,TP53	3
Cancer	intraepithelial neoplasia	3.09E-04	ACTC1,AURKA,AURKB,CD74,CDH3,DMC1,DUT,GPX3,ITGA6,KRT7,MFGE8,PRKCD,PSAT1,SLC16A5,SMS,SOCS1,TMC6,WFDC2	18
Cell Cycle	ploidy of cells	3.11E-04	AURKA,AURKB,BIRC5,CCNA2,CENPH,CKS1B,ERBB2,MST4,PIM1,PLK1,TACC3,TERT,TP53	13
Cell Cycle	senescence of tumor cell lines	3.12E-04	CHEK2,DDB2,DEK,EIF4EBP1,ERBB2,HJURP,MYBL2,PARP1,SRSF2,TERT,TP53	11
Cell Cycle	entry into interphase	3.40E-04	CCNE1,CDC25A,CDC6,CDH1,CHEK2,E2F8,ERBB2,FOXM1,HMOX1,MCM10,MYC,NPM1,TP53,WEE1	14
Cell Cycle	S phase of tumor cell lines	3.57E-04	CCNA2,CCNE1,CCNG1,CDC25A,CDC25C,CDH1,CHEK1,E2F8,FOXM1,HMOX1,MCM10,MYBL2,MYC,PLK1,POLA1,PTPN6,TP53	17
Cell Cycle	delay in initiation of interphase	3.61E-04	CCNE1,CHEK2,ELAC2,FANCD2,FEN1,MX2,NASP,POLA1	8
Cell Death and Survival	necrosis	3.70E-04	A4GALT,ABCE1,ADM,APOE,ARHGAP4,ARTN,AURKA,BAX,BIRC5,BLM,BRCA2,BUB1B,CABLES1,CBR1,CCNB1,CCNE1,CCNG1,CD4,CD40,CD55,CD74,CDC20,CDC25A,CDC25C,CDC45,CDC6,CDCA2,CDCP1,CDH1,CHEK1,CHEK2,CIDEB,COX5A,CSE1L,CYB5A,CYBA,CYCS,DEK,DEPDC1,DHCR24,DNMT3B,DPP4,DSG2,DUT,EGLN3,EIF4EBP1,ENO1,ERBB2,ERBB3,EZR,F2RL1,FANCA,FANCD2,FGF19,FGFR4,FKBP5,FLT1,FLT4,FOXO1,FST,GABRA5,GAL,GGT1,GLI1,GRHL2,GRM4,GSTP1,HMGA1,HMGA2,HMMR,H…	166
Cell Cycle	cytokinesis of tumor cell lines	3.78E-04	AURKB,BIRC5,CD2AP,DIAPH3,KIF14,KIF20A,KIF20B,KIF23,KIFC1,MASTL,MYH14,NPM1	12
Cellular Movement	cytokinesis of tumor cell lines	3.78E-04	AURKB,BIRC5,CD2AP,DIAPH3,KIF14,KIF20A,KIF20B,KIF23,KIFC1,MASTL,MYH14,NPM1	12
Cancer	myeloproliferative disorder	3.79E-04	ATP1A1,AURKA,AURKB,CDC25A,CDCP1,FOXM1,FOXO1,GPX3,GSTP1,HLA-DRA,HMGA2,HPRT1,HSPD1,LCK,LYN,MYC,NPM1,POLA1,POLD1,POLE,POLE2,PPAT,PSIP1,RAD51,RRM2,RRM2B,SH2B3,SRSF2,TEK,TERT,TNFSF11,TP53,TRIB1	33
Hematological Disease	myeloproliferative disorder	3.79E-04	ATP1A1,AURKA,AURKB,CDC25A,CDCP1,FOXM1,FOXO1,GPX3,GSTP1,HLA-DRA,HMGA2,HPRT1,HSPD1,LCK,LYN,MYC,NPM1,POLA1,POLD1,POLE,POLE2,PPAT,PSIP1,RAD51,RRM2,RRM2B,SH2B3,SRSF2,TEK,TERT,TNFSF11,TP53,TRIB1	33
Cancer	ovarian tumor	4.04E-04	ACP5,ALYREF,APOE,ARHGEF5,BRCA2,BRIP1,CCNB2,CCT5,CDH1,CHEK2,CLDN3,CLDN4,CLDN7,COX5A,CTNNAL1,DHCR24,DPP4,EBPL,ENO1,EPCAM,ERBB2,ERBB3,ESRP1,ETV4,FAM72D,FLT1,FLT4,FOSL1,GINS1,GLDC,GLI1,GPX3,GRM4,GSTP1,HMGA1,HMGA2,HMGN5,HPS3,HSP90AB1,IDO1,IGF2BP3,ITPR3,KCNK6,KIAA0101,KRT19,KRT8,LCK,LIN28A,M6PR,MAP7D3,METAP1,MSH2,MSH6,MTFR2,MTHFD2,MYH14,OCLN,PAWR,PHC1,PLAU,POLE,POLE2,PPAP2A,PRDM14,PSAT1,RRAS2,RRM2,SALL…	76
Reproductive System Disease	ovarian tumor	4.04E-04	ACP5,ALYREF,APOE,ARHGEF5,BRCA2,BRIP1,CCNB2,CCT5,CDH1,CHEK2,CLDN3,CLDN4,CLDN7,COX5A,CTNNAL1,DHCR24,DPP4,EBPL,ENO1,EPCAM,ERBB2,ERBB3,ESRP1,ETV4,FAM72D,FLT1,FLT4,FOSL1,GINS1,GLDC,GLI1,GPX3,GRM4,GSTP1,HMGA1,HMGA2,HMGN5,HPS3,HSP90AB1,IDO1,IGF2BP3,ITPR3,KCNK6,KIAA0101,KRT19,KRT8,LCK,LIN28A,M6PR,MAP7D3,METAP1,MSH2,MSH6,MTFR2,MTHFD2,MYH14,OCLN,PAWR,PHC1,PLAU,POLE,POLE2,PPAP2A,PRDM14,PSAT1,RRAS2,RRM2,SALL…	76
Cellular Movement	invasion of cells	4.07E-04	ADM,ARHGAP4,ARTN,AURKA,CARD10,CCKBR,CCNA2,CD9,CDH1,CLDN3,CLDN4,CLDN7,CSE1L,CTSZ,DIAPH1,DIAPH2,DIAPH3,DNMT3B,DPP4,ELF3,EPCAM,ERBB2,ERBB3,ETV4,EZR,FABP5,FHOD1,FLT1,FLT4,FOSL1,FOXM1,FST,FXYD5,GJA1,GLI1,HAS3,HMGA1,HMMR,HMOX1,HPN,HTATIP2,IQGAP1,LGR4,LIN28B,LYN,MATK,MYC,NANOG,PDGFA,PHB,PIK3R2,PLAU,PLEKHG6,PODXL,PRKCD,PTTG1,RAB25,RPS6KA1,RPSA,RRM2,SCN5A,SDC4,SFRP1,SLC9A3R1,ST14	65
DNA Replication, Recombination, and Repair	morphology of mitotic spindle	4.34E-04	FOXM1,ORC6,RAN,RCC1,TACC3	5
Cellular Function and Maintenance	pinocytosis	4.34E-04	EZR,NCL,PLEKHG6,PPT1,SNX5	5
Cancer	diffuse small-cell lymphoma	4.46E-04	EIF4EBP1,MYC,PIM1,PIM2,ROR1,SALL3,SLC29A2,TCF7L1,TNFRSF10A,TNFSF11,TP53,TPST2	12
Hematological Disease	diffuse small-cell lymphoma	4.46E-04	EIF4EBP1,MYC,PIM1,PIM2,ROR1,SALL3,SLC29A2,TCF7L1,TNFRSF10A,TNFSF11,TP53,TPST2	12
Cancer	large-cell lymphoma	4.64E-04	BIRC5,CARD11,GLI1,KDM2B,MYC,PIM1,PIM2,POLA1,POLD1,POLE,SOCS1,TNFRSF8,TNFSF11,TP53,TUBA4A	15
Hematological Disease	large-cell lymphoma	4.64E-04	BIRC5,CARD11,GLI1,KDM2B,MYC,PIM1,PIM2,POLA1,POLD1,POLE,SOCS1,TNFRSF8,TNFSF11,TP53,TUBA4A	15
Cancer	colon carcinoma	5.33E-04	ALDH16A1,ALYREF,BRIP1,CCNA2,CDCA7,CHAF1A,DBI,DESI2,DIAPH1,DPP4,DSCC1,FEN1,FERMT1,FLT4,GDF3,GINS2,GJA1,GMNN,GSTP1,GYLTL1B,HRASLS5,KIF18B,LGR4,LIN28A,LIN28B,MCM10,MCM4,MDN1,MICB,MSH2,MTHFD1L,PARPBP,PGAM1,PLK1,POLD1,POLE,RNASEH2A,SMC4,SPC25,SUV39H1,TEAD4,TFRC,TK1,TMEM97,TP53,TRIP13,TUBA4A,TYRO3,UGT8,UNG,VRK1	51
Gastrointestinal Disease	colon carcinoma	5.33E-04	ALDH16A1,ALYREF,BRIP1,CCNA2,CDCA7,CHAF1A,DBI,DESI2,DIAPH1,DPP4,DSCC1,FEN1,FERMT1,FLT4,GDF3,GINS2,GJA1,GMNN,GSTP1,GYLTL1B,HRASLS5,KIF18B,LGR4,LIN28A,LIN28B,MCM10,MCM4,MDN1,MICB,MSH2,MTHFD1L,PARPBP,PGAM1,PLK1,POLD1,POLE,RNASEH2A,SMC4,SPC25,SUV39H1,TEAD4,TFRC,TK1,TMEM97,TP53,TRIP13,TUBA4A,TYRO3,UGT8,UNG,VRK1	51
Cancer	prostate cancer	5.36E-04	ACTC1,AIM1,ALPL,AMD1,ANAPC1,AURKA,AURKB,BIRC5,BRCA2,CARD11,CCNF,CD74,CDC25C,CDH1,CDH3,CGN,CHEK2,COBL,CTNNAL1,EIF2S3,EIF4EBP1,ELAC2,ERBB2,ETV4,FAM124A,FAM136A,FANCD2,FEN1,FLT1,FLT4,GALNT3,GGT1,GLI1,GPX3,GRPR,GSTP1,HLA-A,HMOX1,HOOK2,HPN,IDO1,KCNS3,KRT7,MCM5,MFGE8,MYBL2,MYC,NASP,NCL,PARP1,PIM1,PLK1,PODXL,PPAT,PRKCD,PSAT1,PSIP1,PYCARD,SFRP1,SLC15A3,SLC16A5,SLC7A1,SMARCD2,SMC4,SMS,SOCS1,TEK,TERT,TK1,T…	75
Reproductive System Disease	prostate cancer	5.36E-04	ACTC1,AIM1,ALPL,AMD1,ANAPC1,AURKA,AURKB,BIRC5,BRCA2,CARD11,CCNF,CD74,CDC25C,CDH1,CDH3,CGN,CHEK2,COBL,CTNNAL1,EIF2S3,EIF4EBP1,ELAC2,ERBB2,ETV4,FAM124A,FAM136A,FANCD2,FEN1,FLT1,FLT4,GALNT3,GGT1,GLI1,GPX3,GRPR,GSTP1,HLA-A,HMOX1,HOOK2,HPN,IDO1,KCNS3,KRT7,MCM5,MFGE8,MYBL2,MYC,NASP,NCL,PARP1,PIM1,PLK1,PODXL,PPAT,PRKCD,PSAT1,PSIP1,PYCARD,SFRP1,SLC15A3,SLC16A5,SLC7A1,SMARCD2,SMC4,SMS,SOCS1,TEK,TERT,TK1,T…	75
DNA Replication, Recombination, and Repair	excision repair	5.38E-04	BRCA2,DDB2,DNA2,EXO1,FEN1,HMGA1,HMGA2,POLD1,POLE,RAD51,TP53	11
Cancer	bladder cancer	5.65E-04	AIM1,BIRC5,BRCA2,ERBB2,FLT4,FOSL1,FOXO1,GSTP1,HSP90AB1,KDM2B,KIF20B,KRT19,POLE,POLE2,PPL,PSIP1,RRM2,TACC3,TNFRSF10A	19
Renal and Urological Disease	bladder cancer	5.65E-04	AIM1,BIRC5,BRCA2,ERBB2,FLT4,FOSL1,FOXO1,GSTP1,HSP90AB1,KDM2B,KIF20B,KRT19,POLE,POLE2,PPL,PSIP1,RRM2,TACC3,TNFRSF10A	19
Cell Cycle	entry into S phase	5.71E-04	CCNE1,CDC25A,CDC6,CDH1,CHEK2,E2F8,ERBB2,FOXM1,HMOX1,MCM10,MYC,NPM1,TP53	13
Cell Cycle	entry into mitosis of tumor cell lines	5.73E-04	AURKA,CDC25A,CDC25C,CHEK1,MATK,PKMYT1	6
Cell Death and Survival	fragmentation of nucleus	5.73E-04	BAX,MYC,NPM1,PLK1,TESK2,TP53	6
Cellular Compromise	fragmentation of nucleus	5.73E-04	BAX,MYC,NPM1,PLK1,TESK2,TP53	6
Cellular Assembly and Organization	shortening of telomeres	5.73E-04	GNL3L,HMGA2,NAT10,SOD3,TERF1,TERT	6
Cancer	leukemia	5.81E-04	AURKA,AURKB,BAX,CD55,CD74,CDCP1,DPP4,FOXM1,FOXO1,GPX3,GSTP1,HLA-DRA,HPRT1,HSPD1,ITGA6,JARID2,LCK,LDHA,LSM3,LYN,MSH2,MYC,NPM1,PIM2,PLCG2,POLA1,POLD1,POLE,POLE2,PPAT,PRIM1,PSIP1,PTPN6,RAD51,ROR1,RRM2,RRM2B,SNRPD3,SRSF2,TEK,TERT,TET1,TNFRSF10A,TNFSF11,TP53,TUBA4A	46
Hematological Disease	leukemia	5.81E-04	AURKA,AURKB,BAX,CD55,CD74,CDCP1,DPP4,FOXM1,FOXO1,GPX3,GSTP1,HLA-DRA,HPRT1,HSPD1,ITGA6,JARID2,LCK,LDHA,LSM3,LYN,MSH2,MYC,NPM1,PIM2,PLCG2,POLA1,POLD1,POLE,POLE2,PPAT,PRIM1,PSIP1,PTPN6,RAD51,ROR1,RRM2,RRM2B,SNRPD3,SRSF2,TEK,TERT,TET1,TNFRSF10A,TNFSF11,TP53,TUBA4A	46
Cell Death and Survival	cell death of prostate cell lines	5.90E-04	PAWR,PRR13,SFRP1,TP53	4
Vitamin and Mineral Metabolism	metabolism of folic acid and derivative	5.90E-04	MTHFD1L,MTHFD2,MTHFS,SHMT1	4
Cell Cycle	spindle checkpoint of mitotic cells	5.90E-04	BUB1,MAD2L2,TERF1,TTK	4
DNA Replication, Recombination, and Repair	spindle checkpoint of mitotic cells	5.90E-04	BUB1,MAD2L2,TERF1,TTK	4
Cancer	Cancer	6.09E-04	ACP5,ACTC1,ACY1,ADAMTS19,ADAMTS8,ADCY2,ADM,ADSL,AHCY,AIM1,AIMP2,AKAP1,ALDH16A1,ALDH1B1,ALG1,ALPL,ALYREF,AMD1,ANAPC1,ANKRD24,ANLN,ANO1,APOC1,APOE,ARHGAP11A,ARHGAP8/PRR5-ARHGAP8,ARHGEF5,ARL2,ASF1B,ATAD3A/ATAD3B,ATIC,AURKA,AURKB,BAX,BCAT1,BEND4,BIRC5,BRCA2,BRIP1,BST2,BUB1,BUB1B,C10orf82,C11orf48,C11orf82,C18orf54,C1orf94,C6orf211,C9orf64,CAD,CAMTA1,CARD11,CBLC,CBS,CCDC150,CCKBR,CCNA2,CCNB1,CCNB2,CCN…	597
Cell Cycle	mitosis of colon cancer cell lines	7.04E-04	BIRC5,CDC25A,CHEK1,PLK1,TP53	5
Cell Cycle	segregation of sister chromatids	7.04E-04	CCNA2,DDX11,ESPL1,SMC4,ZWINT	5
DNA Replication, Recombination, and Repair	segregation of sister chromatids	7.04E-04	CCNA2,DDX11,ESPL1,SMC4,ZWINT	5
Cellular Assembly and Organization	segregation of sister chromatids	7.04E-04	CCNA2,DDX11,ESPL1,SMC4,ZWINT	5
Cellular Movement	cell movement of ovarian cancer cell lines	7.17E-04	CDCP1,CLDN3,CLDN4,CLDN7,DPP4,HAS3,IQGAP1,LPAR3,TP53	9
DNA Replication, Recombination, and Repair	amplification of centrosome	7.37E-04	AURKA,CCNE1,CDC25C,PIM1,PLK1,TP53,TTK	7
Cellular Assembly and Organization	amplification of centrosome	7.37E-04	AURKA,CCNE1,CDC25C,PIM1,PLK1,TP53,TTK	7
Cell Signaling	transmembrane receptor protein tyrosine kinase signaling pathway	7.66E-04	CD3EAP,CNKSR1,ERBB2,ERBB3,FLT1,FLT4,LYN,TEK	8
Cellular Movement	invasion of tumor cell lines	8.11E-04	ADM,ARHGAP4,ARTN,AURKA,CARD10,CCKBR,CCNA2,CD9,CDH1,CLDN3,CLDN4,CLDN7,CSE1L,CTSZ,DIAPH1,DIAPH2,DIAPH3,DNMT3B,DPP4,EPCAM,ERBB2,ERBB3,ETV4,EZR,FABP5,FHOD1,FOSL1,FOXM1,FXYD5,GLI1,HAS3,HMGA1,HMMR,HMOX1,HPN,HTATIP2,LGR4,LIN28B,LYN,MATK,PDGFA,PHB,PIK3R2,PLAU,PLEKHG6,PODXL,PRKCD,PTTG1,RAB25,RPS6KA1,RPSA,RRM2,SCN5A,SDC4,SFRP1,SLC9A3R1,ST14	57
Cancer	bone marrow cancer	8.15E-04	AURKA,AURKB,BAX,BIRC5,CD55,CD74,CDC25A,CDCP1,DPP4,FOXM1,FOXO1,GPX3,GSTP1,HLA-DRA,HPRT1,HSPD1,ITGA6,JARID2,LARS2,LCK,LDHA,LSM3,LYN,MSH2,MT-ND1,MYC,NPM1,PIM2,PLCG2,POLA1,POLD1,POLE,POLE2,PPAT,PRIM1,PSIP1,RAD51,ROR1,RPL13A,RRM2,RRM2B,SNRPD3,SRSF2,TEK,TERT,TET1,TNFRSF10A,TNFSF11,TP53,TUBA4A	50
Hematological Disease	bone marrow cancer	8.15E-04	AURKA,AURKB,BAX,BIRC5,CD55,CD74,CDC25A,CDCP1,DPP4,FOXM1,FOXO1,GPX3,GSTP1,HLA-DRA,HPRT1,HSPD1,ITGA6,JARID2,LARS2,LCK,LDHA,LSM3,LYN,MSH2,MT-ND1,MYC,NPM1,PIM2,PLCG2,POLA1,POLD1,POLE,POLE2,PPAT,PRIM1,PSIP1,RAD51,ROR1,RPL13A,RRM2,RRM2B,SNRPD3,SRSF2,TEK,TERT,TET1,TNFRSF10A,TNFSF11,TP53,TUBA4A	50
Cancer	pancreatic tumor	8.66E-04	ADSL,AKAP1,ALYREF,APOC1,ATIC,ATP1A1,BIRC5,BRCA2,CD74,CDH1,CDH3,CYBA,ENO1,ERBB2,FLT1,FLT4,GLI1,GSTP1,HLA-DRA,IDO1,KIAA0101,KRT19,KRT7,LIN28A,MRPL37,PABPC3,PLAU,POLE,POLE2,PRKCD,RAD54L,RRM2,RRM2B,SOCS1,TNFRSF10A,TP53,TUBA4A,VIL1,VRK2,XRCC2	40
Gastrointestinal Disease	pancreatic tumor	8.66E-04	ADSL,AKAP1,ALYREF,APOC1,ATIC,ATP1A1,BIRC5,BRCA2,CD74,CDH1,CDH3,CYBA,ENO1,ERBB2,FLT1,FLT4,GLI1,GSTP1,HLA-DRA,IDO1,KIAA0101,KRT19,KRT7,LIN28A,MRPL37,PABPC3,PLAU,POLE,POLE2,PRKCD,RAD54L,RRM2,RRM2B,SOCS1,TNFRSF10A,TP53,TUBA4A,VIL1,VRK2,XRCC2	40
Endocrine System Disorders	pancreatic tumor	8.66E-04	ADSL,AKAP1,ALYREF,APOC1,ATIC,ATP1A1,BIRC5,BRCA2,CD74,CDH1,CDH3,CYBA,ENO1,ERBB2,FLT1,FLT4,GLI1,GSTP1,HLA-DRA,IDO1,KIAA0101,KRT19,KRT7,LIN28A,MRPL37,PABPC3,PLAU,POLE,POLE2,PRKCD,RAD54L,RRM2,RRM2B,SOCS1,TNFRSF10A,TP53,TUBA4A,VIL1,VRK2,XRCC2	40
Cancer	tumorigenesis of cells	8.78E-04	CKS1B,DPP4,ERBB2,GLDC,IKBKE,LIN28B,MST4,MYC,PARP1,PIM1,PPAP2A,ST14,TERT,TP53	14
Cancer	ovarian cancer	8.84E-04	ACP5,APOE,ARHGEF5,BRCA2,BRIP1,CCNB2,CCT5,CDH1,CHEK2,CLDN3,CLDN4,CLDN7,COX5A,CTNNAL1,DHCR24,DPP4,EBPL,ENO1,EPCAM,ERBB2,ERBB3,ESRP1,ETV4,FAM72D,FLT4,FOSL1,GINS1,GLDC,GLI1,GPX3,GRM4,GSTP1,HMGA1,HMGA2,HMGN5,HPS3,HSP90AB1,IDO1,IGF2BP3,ITPR3,KCNK6,KIAA0101,KRT19,KRT8,M6PR,MAP7D3,METAP1,MSH2,MSH6,MTFR2,MTHFD2,MYH14,OCLN,PAWR,PHC1,PLAU,POLE,POLE2,PPAP2A,PRDM14,PSAT1,RRAS2,RRM2,SALL4,SFRP1,SMC4,SPINT2,STC…	72
Reproductive System Disease	ovarian cancer	8.84E-04	ACP5,APOE,ARHGEF5,BRCA2,BRIP1,CCNB2,CCT5,CDH1,CHEK2,CLDN3,CLDN4,CLDN7,COX5A,CTNNAL1,DHCR24,DPP4,EBPL,ENO1,EPCAM,ERBB2,ERBB3,ESRP1,ETV4,FAM72D,FLT4,FOSL1,GINS1,GLDC,GLI1,GPX3,GRM4,GSTP1,HMGA1,HMGA2,HMGN5,HPS3,HSP90AB1,IDO1,IGF2BP3,ITPR3,KCNK6,KIAA0101,KRT19,KRT8,M6PR,MAP7D3,METAP1,MSH2,MSH6,MTFR2,MTHFD2,MYH14,OCLN,PAWR,PHC1,PLAU,POLE,POLE2,PPAP2A,PRDM14,PSAT1,RRAS2,RRM2,SALL4,SFRP1,SMC4,SPINT2,STC…	72
Endocrine System Disorders	ovarian cancer	8.84E-04	ACP5,APOE,ARHGEF5,BRCA2,BRIP1,CCNB2,CCT5,CDH1,CHEK2,CLDN3,CLDN4,CLDN7,COX5A,CTNNAL1,DHCR24,DPP4,EBPL,ENO1,EPCAM,ERBB2,ERBB3,ESRP1,ETV4,FAM72D,FLT4,FOSL1,GINS1,GLDC,GLI1,GPX3,GRM4,GSTP1,HMGA1,HMGA2,HMGN5,HPS3,HSP90AB1,IDO1,IGF2BP3,ITPR3,KCNK6,KIAA0101,KRT19,KRT8,M6PR,MAP7D3,METAP1,MSH2,MSH6,MTFR2,MTHFD2,MYH14,OCLN,PAWR,PHC1,PLAU,POLE,POLE2,PPAP2A,PRDM14,PSAT1,RRAS2,RRM2,SALL4,SFRP1,SMC4,SPINT2,STC…	72
Cell Death and Survival	cell viability of lymphoma cell lines	9.09E-04	BRIP1,CBR1,GLI1,HMOX1,MTA3,RAD51,TCF7L1,TERT,TNFSF11,TP53	10
Cancer	cell transformation	9.11E-04	AMD1,AURKA,CDC25A,CDH1,ELF3,FGFR4,GLI1,HMGA1,HMGA2,MATK,MYC,PAWR,RRAS2,SFRP1,SLC3A2,TERT,TNFRSF8,TP53	18
Cell Death and Survival	apoptosis of cancer cells	9.26E-04	BAX,BIRC5,CD40,CDC45,CDC6,CDH1,CHEK1,DNMT3B,ENO1,GLI1,MYC,PARP1,PLK1,PMAIP1,PRKCD,RPS6KA1,TERT,TNFRSF10A,TP53	19
Tumor Morphology	apoptosis of cancer cells	9.26E-04	BAX,BIRC5,CD40,CDC45,CDC6,CDH1,CHEK1,DNMT3B,ENO1,GLI1,MYC,PARP1,PLK1,PMAIP1,PRKCD,RPS6KA1,TERT,TNFRSF10A,TP53	19
Cancer	myeloid leukemia	9.34E-04	AURKA,AURKB,CDCP1,FOXM1,FOXO1,GPX3,GSTP1,HLA-DRA,HPRT1,HSPD1,LCK,LYN,NPM1,POLA1,POLD1,POLE,POLE2,PPAT,PSIP1,RAD51,RRM2,RRM2B,SRSF2,TEK,TERT,TNFSF11,TP53	27
Hematological Disease	myeloid leukemia	9.34E-04	AURKA,AURKB,CDCP1,FOXM1,FOXO1,GPX3,GSTP1,HLA-DRA,HPRT1,HSPD1,LCK,LYN,NPM1,POLA1,POLD1,POLE,POLE2,PPAT,PSIP1,RAD51,RRM2,RRM2B,SRSF2,TEK,TERT,TNFSF11,TP53	27
Cancer	carcinoma in situ	9.56E-04	ACTC1,AURKA,AURKB,CD74,CDH3,DMC1,DUT,GPX3,HMGA2,ITGA6,KLRG2,KRT7,MFGE8,MREG,PDPN,PRKCD,PSAT1,SLC16A5,SMS,STOM,TMC6,UPP1,WFDC2	23
Cell Death and Survival	apoptosis	1.03E-03	A4GALT,ABCE1,ACAA2,ADM,APOE,ARHGAP4,AURKA,BAX,BIRC5,BLM,BRCA2,C1QBP,CCNB1,CCNE1,CCNG1,CD4,CD40,CD55,CD74,CDC20,CDC25A,CDC25C,CDC45,CDC6,CDCA2,CDCP1,CDH1,CECR2,CHEK1,CHEK2,CIDEB,CNKSR1,COX5A,CSE1L,CYB5A,CYBA,CYCS,DEPDC1,DHCR24,DNMT3B,DPP4,DSG2,DUT,EDA,EIF4EBP1,EIF5A,ENO1,ERBB2,ERBB3,ESPL1,EZR,FANCA,FGF19,FGFR4,FKBP5,FLT1,FLT4,FOXO1,FST,GAL,GGT1,GLI1,GRHL2,GRM4,GSTP1,HMGA1,HMGA2,HMMR,HMOX1,HPN,HSP9…	162
Cell Cycle	G2 phase of bone cancer cell lines	1.08E-03	CHEK1,FOXM1,PLK1,TP53,WEE1	5
Cancer	lymphocytic leukemia	1.09E-03	BAX,CD55,CD74,DPP4,HPRT1,ITGA6,JARID2,LCK,LDHA,LSM3,LYN,MSH2,MYC,PIM2,PLCG2,POLA1,POLD1,POLE,POLE2,PPAT,PRIM1,ROR1,RRM2,RRM2B,SNRPD3,TEK,TET1,TNFRSF10A,TNFSF11,TP53,TUBA4A	31
Hematological Disease	lymphocytic leukemia	1.09E-03	BAX,CD55,CD74,DPP4,HPRT1,ITGA6,JARID2,LCK,LDHA,LSM3,LYN,MSH2,MYC,PIM2,PLCG2,POLA1,POLD1,POLE,POLE2,PPAT,PRIM1,ROR1,RRM2,RRM2B,SNRPD3,TEK,TET1,TNFRSF10A,TNFSF11,TP53,TUBA4A	31
Immunological Disease	lymphocytic leukemia	1.09E-03	BAX,CD55,CD74,DPP4,HPRT1,ITGA6,JARID2,LCK,LDHA,LSM3,LYN,MSH2,MYC,PIM2,PLCG2,POLA1,POLD1,POLE,POLE2,PPAT,PRIM1,ROR1,RRM2,RRM2B,SNRPD3,TEK,TET1,TNFRSF10A,TNFSF11,TP53,TUBA4A	31
Cancer	diffuse B-cell lymphoma	1.09E-03	CARD11,EIF4EBP1,KDM2B,MYC,PIM1,PIM2,ROR1,SALL3,SLC29A2,SOCS1,TCF7L1,TNFRSF10A,TNFSF11,TP53,TPST2	15
Hematological Disease	diffuse B-cell lymphoma	1.09E-03	CARD11,EIF4EBP1,KDM2B,MYC,PIM1,PIM2,ROR1,SALL3,SLC29A2,SOCS1,TCF7L1,TNFRSF10A,TNFSF11,TP53,TPST2	15
Cellular Function and Maintenance	macropinocytosis	1.12E-03	EZR,NCL,PLEKHG6,SNX5	4
Cancer	malignant mixed Mullerian tumor	1.12E-03	CDH1,CLDN3,CLDN4,TP53	4
Reproductive System Disease	malignant mixed Mullerian tumor	1.12E-03	CDH1,CLDN3,CLDN4,TP53	4
Cell Cycle	arrest in G2 phase of cervical cancer cell lines	1.12E-03	CCNA2,CCNB1,CHEK1,CSE1L,MASTL,PLK1	6
Cell Cycle	delay in initiation of M phase	1.12E-03	BIRC5,BUB1B,CCNB1,MYH14,PIM1,PLK1	6
Cell Cycle	prometaphase	1.12E-03	BIRC5,BUB1B,CCNE1,CDT1,KIFC1,MASTL	6
Amino Acid Metabolism	metabolism of amino acids	1.13E-03	CBS,GGT1,GLDC,IDO1,MCCC2,MYC,PAH,SCLY,SHMT1,SLC6A6,SLC7A2,SLC7A5,SLC7A8,SMS	14
Small Molecule Biochemistry	metabolism of amino acids	1.13E-03	CBS,GGT1,GLDC,IDO1,MCCC2,MYC,PAH,SCLY,SHMT1,SLC6A6,SLC7A2,SLC7A5,SLC7A8,SMS	14
Cell Death and Survival	apoptosis of prostate cell lines	1.13E-03	PAWR,PRR13,SFRP1	3
Cell Death and Survival	cell viability of germ cell tumor cell lines	1.13E-03	PMAIP1,POU5F1,TP53	3
DNA Replication, Recombination, and Repair	fragmentation of chromosomes	1.13E-03	PIM1,TERT,TP53	3
Cellular Compromise	fragmentation of chromosomes	1.13E-03	PIM1,TERT,TP53	3
Cellular Assembly and Organization	fusion of chromosomes	1.13E-03	FANCA,HJURP,TERT	3
Cancer	lymphoblastic lymphoma	1.13E-03	POLA1,POLD1,POLE	3
Hematological Disease	lymphoblastic lymphoma	1.13E-03	POLA1,POLD1,POLE	3
Hematological System Development and Function	quantity of cytotoxic T cells	1.13E-03	ERBB2,LCK,TERT	3
Tissue Morphology	quantity of cytotoxic T cells	1.13E-03	ERBB2,LCK,TERT	3
Cell Cycle	re-entry into cell cycle progression of tumor cell lines	1.13E-03	PLK1,TERT,TP53	3
Cellular Compromise	nucleation of cells	1.25E-03	AURKB,BRCA2,CCNE1,DIAPH3,KIF14,KIF23,TP53	7
Cell Cycle	arrest in interphase of bone cancer cell lines	1.29E-03	CCNE1,CHEK1,FOXM1,GNL3,MYBL2,MYC,ORC3,TP53,WEE1	9
Cell Cycle	G1 phase	1.36E-03	APOE,BAX,BCAT1,BIRC5,CCNE1,CCNG1,CD40,CDC25A,CDC25C,CDC6,CDCA2,CDCA5,CHEK2,EIF4EBP1,ERBB2,ERBB3,FOXM1,FOXO1,GJA1,GMNN,GNL3,HMGA1,MX2,MYBL2,MYC,NASP,ORC3,PIM1,POLE,RCC1,TBRG4,TFRC,TP53	33
Cell Death and Survival	apoptosis of tumor cells	1.41E-03	BAX,BIRC5,CD40,CDC45,CDC6,CDH1,CHEK1,DNMT3B,ENO1,FOXO1,GLI1,HMGA2,MYC,PARP1,PLK1,PMAIP1,PRKCD,RPS6KA1,TERT,TNFRSF10A,TP53	21
Tumor Morphology	apoptosis of tumor cells	1.41E-03	BAX,BIRC5,CD40,CDC45,CDC6,CDH1,CHEK1,DNMT3B,ENO1,FOXO1,GLI1,HMGA2,MYC,PARP1,PLK1,PMAIP1,PRKCD,RPS6KA1,TERT,TNFRSF10A,TP53	21
Cell Cycle	G2 phase of colon cancer cell lines	1.51E-03	CHEK1,CHEK2,GMNN,NPM1,TP53,WEE1	6
Cancer	hairy-cell leukemia	1.51E-03	POLA1,POLE,POLE2,RRM2,RRM2B,TP53	6
Hematological Disease	hairy-cell leukemia	1.51E-03	POLA1,POLE,POLE2,RRM2,RRM2B,TP53	6
Immunological Disease	hairy-cell leukemia	1.51E-03	POLA1,POLE,POLE2,RRM2,RRM2B,TP53	6
Gastrointestinal Disease	dental disorder	1.54E-03	CDC6,CDT1,CTSC,EDA,EDARADD,FAM83H,GJA1,ORC1,ORC6	9
Connective Tissue Disorders	dental disorder	1.54E-03	CDC6,CDT1,CTSC,EDA,EDARADD,FAM83H,GJA1,ORC1,ORC6	9
Dental Disease	dental disorder	1.54E-03	CDC6,CDT1,CTSC,EDA,EDARADD,FAM83H,GJA1,ORC1,ORC6	9
Skeletal and Muscular Disorders	dental disorder	1.54E-03	CDC6,CDT1,CTSC,EDA,EDARADD,FAM83H,GJA1,ORC1,ORC6	9
Cell Cycle	S phase of bone cancer cell lines	1.59E-03	CCNA2,CCNE1,CDC25A,MYBL2,MYC	5
Nucleic Acid Metabolism	metabolism of nucleoside triphosphate	1.60E-03	ACTC1,AK4,BLM,CCNB1,DNA2,ENPP1,HSPD1,KIF20B,MSH2,MSH6,NUDT1,SLC25A13,TNNT2,TP53	14
Small Molecule Biochemistry	metabolism of nucleoside triphosphate	1.60E-03	ACTC1,AK4,BLM,CCNB1,DNA2,ENPP1,HSPD1,KIF20B,MSH2,MSH6,NUDT1,SLC25A13,TNNT2,TP53	14
Cell Cycle	interphase of breast cancer cell lines	1.66E-03	CCNE1,CCNG1,CDC25A,CDC25C,CDH1,CHEK1,ERBB2,ERBB3,MSH2,MYC,PRDM5,TP53,WEE1	13
Cell Death and Survival	cell death of cervical cancer cell lines	1.74E-03	A4GALT,ARHGAP4,BAX,BIRC5,BUB1B,CCNB1,CDC20,CDC6,CDCA2,CHEK1,CIDEB,COX5A,EZR,FST,IKBKE,ITPK1,KIF14,MCM10,MMS22L,MYC,PARP1,PAWR,PLK1,PMAIP1,PRKCD,PSIP1,PTRH2,SKA3,SPC25,TACC3,TDGF1,TERF1,TERT,TESK2,TNFRSF10A,TP53,TRAF2,TTK	38
Cell Signaling	enzyme linked receptor protein signaling pathway	1.76E-03	CD3EAP,CD4,CNKSR1,ERBB2,ERBB3,FLT1,FLT4,LYN,NPR1,TEK	10
Cellular Growth and Proliferation	proliferation of pancreatic cancer cell lines	1.80E-03	ADM,AURKA,BRCA2,ERBB2,FOXM1,GLI1,HMGA1,KIAA0101,KIF20A,MYC,NPM1,PDGFA,RRM2,TP53	14
Cellular Development	proliferation of pancreatic cancer cell lines	1.80E-03	ADM,AURKA,BRCA2,ERBB2,FOXM1,GLI1,HMGA1,KIAA0101,KIF20A,MYC,NPM1,PDGFA,RRM2,TP53	14
Hematological Disease	congenital aplastic anemia	1.80E-03	BRCA2,BRIP1,FANCA,FANCB,FANCD2,FANCI,RPS10,RPS26	8
Developmental Disorder	congenital aplastic anemia	1.80E-03	BRCA2,BRIP1,FANCA,FANCB,FANCD2,FANCI,RPS10,RPS26	8
RNA Post-Transcriptional Modification	processing of rRNA	1.80E-03	HEATR1,NOLC1,NOP56,NOP58,NPM1,UTP20,WDR12,WDR43	8
Cancer	bladder tumor	1.86E-03	AIM1,BIRC5,BRCA2,ERBB2,FLT4,FOSL1,FOXO1,GSTP1,HSP90AB1,KDM2B,KIF20B,KRT19,POLE,POLE2,PPL,PSIP1,RRM2,TACC3,TNFRSF10A,TP53	20
Renal and Urological Disease	bladder tumor	1.86E-03	AIM1,BIRC5,BRCA2,ERBB2,FLT4,FOSL1,FOXO1,GSTP1,HSP90AB1,KDM2B,KIF20B,KRT19,POLE,POLE2,PPL,PSIP1,RRM2,TACC3,TNFRSF10A,TP53	20
DNA Replication, Recombination, and Repair	damage of chromosomes	1.90E-03	BRIP1,FANCA,MYC,TERT	4
Cellular Compromise	damage of chromosomes	1.90E-03	BRIP1,FANCA,MYC,TERT	4
Amino Acid Metabolism	metabolism of amino acid analogs	1.90E-03	MTHFD1L,MTHFD2,MTHFS,SHMT1	4
Small Molecule Biochemistry	metabolism of amino acid analogs	1.90E-03	MTHFD1L,MTHFD2,MTHFS,SHMT1	4
Cell Cycle	segregation of mitotic sister chromatids	1.90E-03	DDX11,ESPL1,SMC4,ZWINT	4
DNA Replication, Recombination, and Repair	segregation of mitotic sister chromatids	1.90E-03	DDX11,ESPL1,SMC4,ZWINT	4
Cellular Assembly and Organization	segregation of mitotic sister chromatids	1.90E-03	DDX11,ESPL1,SMC4,ZWINT	4
DNA Replication, Recombination, and Repair	stabilization of chromosomes	1.90E-03	BUB1B,KIF22,MYC,XRCC2	4
Cellular Assembly and Organization	stabilization of chromosomes	1.90E-03	BUB1B,KIF22,MYC,XRCC2	4
Cancer	neoplasia of cells	1.94E-03	CDC25A,CKS1B,DPP4,ERBB2,GLDC,HTATIP2,IKBKE,LIN28B,MST4,MYC,PARP1,PIM1,PPAP2A,ST14,TERT,TP53	16
Developmental Disorder	Growth Failure	2.00E-03	CDC6,CDT1,HMOX1,ORC1,ORC6,POC1A	6
Cancer	high-grade lymphoma	2.17E-03	MYC,POLA1,POLD1,POLE,SALL3,SLC29A2,TCF7L1,TP53,TPST2	9
Hematological Disease	high-grade lymphoma	2.17E-03	MYC,POLA1,POLD1,POLE,SALL3,SLC29A2,TCF7L1,TP53,TPST2	9
Cellular Growth and Proliferation	proliferation of leukemia cell lines	2.22E-03	AURKB,BIRC5,CCNB1,CDCP1,EIF5A,FOXM1,FOXO1,GLI1,HMOX1,IGF2BP3,LYN,MYC,PHC1,PIM1,PLAU,PTPN6,RPS6KA1,SALL4,SH2B3,SUV39H1,TCN2,TERT,TP53	23
Cellular Development	proliferation of leukemia cell lines	2.22E-03	AURKB,BIRC5,CCNB1,CDCP1,EIF5A,FOXM1,FOXO1,GLI1,HMOX1,IGF2BP3,LYN,MYC,PHC1,PIM1,PLAU,PTPN6,RPS6KA1,SALL4,SH2B3,SUV39H1,TCN2,TERT,TP53	23
Cell Cycle	arrest in G2 phase of lung cancer cell lines	2.25E-03	CHEK1,CHEK2,RRM2B,TP53,TRAF2	5
Cell Cycle	duplication of centrosome	2.25E-03	ARHGEF10,BRCA2,NPM1,TP53,TTK	5
DNA Replication, Recombination, and Repair	duplication of centrosome	2.25E-03	ARHGEF10,BRCA2,NPM1,TP53,TTK	5
Cellular Assembly and Organization	duplication of centrosome	2.25E-03	ARHGEF10,BRCA2,NPM1,TP53,TTK	5
Cellular Function and Maintenance	duplication of centrosome	2.25E-03	ARHGEF10,BRCA2,NPM1,TP53,TTK	5
Cancer	esophageal adenocarcinoma	2.25E-03	GLI1,GSTP1,MYC,PARP1,RAD51	5
Gastrointestinal Disease	esophageal adenocarcinoma	2.25E-03	GLI1,GSTP1,MYC,PARP1,RAD51	5
Cell Death and Survival	cell death	2.43E-03	A4GALT,ABCE1,ACAA2,ADM,APOE,ARHGAP4,ARTN,AURKA,BAX,BIRC5,BLM,BRCA2,BUB1B,C1QBP,CABLES1,CBR1,CBS,CCNB1,CCNE1,CCNG1,CD4,CD40,CD55,CD74,CD9,CDC20,CDC25A,CDC25C,CDC45,CDC6,CDCA2,CDCP1,CDH1,CECR2,CHEK1,CHEK2,CIDEB,CNKSR1,COX5A,CSE1L,CYB5A,CYBA,CYCS,DDB2,DEK,DEPDC1,DHCR24,DNMT3B,DPP4,DSG2,DUT,EDA,EGLN3,EIF4EBP1,EIF5A,ENO1,ERBB2,ERBB3,ESPL1,EZR,F2RL1,FANCA,FANCD2,FGF19,FGFR4,FKBP5,FLT1,FLT4,FOXM1,FOXO1,…	192
Protein Synthesis	oligomerization of protein	2.44E-03	BAX,BLM,EHD4,HMOX1,NACC1,NPM1,PMAIP1,RAD51,STOM,TEK,TERF1,TP53	12
Developmental Disorder	genodermatosis	2.46E-03	CDH1,CDH3,DKC1,DSP,EDA,EDARADD,GJA1,ITGA6,LAMC2,NOP10,TERT	11
Organismal Injury and Abnormalities	genodermatosis	2.46E-03	CDH1,CDH3,DKC1,DSP,EDA,EDARADD,GJA1,ITGA6,LAMC2,NOP10,TERT	11
Dermatological Diseases and Conditions	genodermatosis	2.46E-03	CDH1,CDH3,DKC1,DSP,EDA,EDARADD,GJA1,ITGA6,LAMC2,NOP10,TERT	11
Cell Cycle	S phase of cervical cancer cell lines	2.59E-03	CDC25C,CHEK1,FOXM1,MCM10,PLK1,POLA1	6
Cancer	bladder carcinoma	2.59E-03	ERBB2,FOXO1,GSTP1,HSP90AB1,KIF20B,PSIP1	6
Renal and Urological Disease	bladder carcinoma	2.59E-03	ERBB2,FOXO1,GSTP1,HSP90AB1,KIF20B,PSIP1	6
Cellular Growth and Proliferation	proliferation of lymphoblastoid cell lines	2.62E-03	BAX,FANCA,FKBP5,GLI1,LDHA,LIG1,MYBBP1A,MYC	8
Cellular Development	proliferation of lymphoblastoid cell lines	2.62E-03	BAX,FANCA,FKBP5,GLI1,LDHA,LIG1,MYBBP1A,MYC	8
Cancer	prostatic carcinoma	2.66E-03	ACTC1,AIM1,ANAPC1,AURKA,AURKB,CARD11,CCNF,CD74,CDH3,CHEK2,COBL,CTNNAL1,ERBB2,FAM124A,FAM136A,FANCD2,FEN1,GALNT3,GGT1,GPX3,GSTP1,HLA-A,HOOK2,HPN,IDO1,KRT7,MFGE8,MYC,NASP,NCL,PIM1,PODXL,PRKCD,PSAT1,SLC15A3,SLC16A5,SMS,SOCS1,TP53,WFDC2,ZNF649,ZWINT	42
Reproductive System Disease	prostatic carcinoma	2.66E-03	ACTC1,AIM1,ANAPC1,AURKA,AURKB,CARD11,CCNF,CD74,CDH3,CHEK2,COBL,CTNNAL1,ERBB2,FAM124A,FAM136A,FANCD2,FEN1,GALNT3,GGT1,GPX3,GSTP1,HLA-A,HOOK2,HPN,IDO1,KRT7,MFGE8,MYC,NASP,NCL,PIM1,PODXL,PRKCD,PSAT1,SLC15A3,SLC16A5,SMS,SOCS1,TP53,WFDC2,ZNF649,ZWINT	42
Tissue Development	accumulation of lung cancer cell lines	2.69E-03	HMOX1,PTTG1,TP53	3
Cell Cycle	arrest in G2/M phase transition of fibroblasts	2.69E-03	CCNB1,CDC25C,TP53	3
Connective Tissue Development and Function	arrest in G2/M phase transition of fibroblasts	2.69E-03	CCNB1,CDC25C,TP53	3
Cell Cycle	arrest in mitosis of colon cancer cell lines	2.69E-03	BIRC5,PLK1,TP53	3
Cell Cycle	delay in cytokinesis	2.69E-03	CCNB1,MYH14,PIM1	3
Cellular Movement	delay in cytokinesis	2.69E-03	CCNB1,MYH14,PIM1	3
Cellular Function and Maintenance	organization of cells	2.69E-03	CDH1,DSC2,DSG2	3
Cell Cycle	ploidy of colon cancer cell lines	2.69E-03	BIRC5,CENPH,TP53	3
DNA Replication, Recombination, and Repair	relaxation of DNA	2.69E-03	PARP1,PAWR,TP53	3
Cell Death and Survival	apoptosis of cervical cancer cell lines	2.74E-03	ARHGAP4,BAX,BIRC5,CCNB1,CDC20,CDC6,CDCA2,CHEK1,CIDEB,COX5A,EZR,FST,IKBKE,ITPK1,KIF14,MCM10,MYC,PARP1,PAWR,PLK1,PRKCD,PTRH2,TACC3,TDGF1,TERF1,TERT,TESK2,TP53,TRAF2,TTK	30
Cellular Growth and Proliferation	proliferation of fibroblast cell lines	2.75E-03	BLM,CCNE1,CD9,F2RL1,FOXO1,LIG1,MYC,SLC3A2,TERT,TP53	10
Connective Tissue Development and Function	proliferation of fibroblast cell lines	2.75E-03	BLM,CCNE1,CD9,F2RL1,FOXO1,LIG1,MYC,SLC3A2,TERT,TP53	10
Cellular Development	proliferation of fibroblast cell lines	2.75E-03	BLM,CCNE1,CD9,F2RL1,FOXO1,LIG1,MYC,SLC3A2,TERT,TP53	10
Cancer	hematological neoplasia	2.78E-03	ATP1A1,AURKA,AURKB,BAX,BCAT1,BIRC5,CARD11,CCNB1,CD40,CD55,CD74,CDC20,CDC25A,CDCP1,CHAF1A,CHEK2,CSE1L,DIAPH1,DPP4,DUSP5,EIF4EBP1,F11R,FEN1,FOXM1,FOXO1,G3BP1,GLI1,GPX3,GSTP1,HLA-A,HLA-DRA,HMOX1,HPRT1,HSPD1,ITGA6,JARID2,KDM2B,LCK,LDHA,LSM3,LYN,MSH2,MYC,NPM1,PARP1,PDIA6,PIM1,PIM2,PLCG2,POLA1,POLD1,POLE,POLE2,PPAT,PRIM1,PSIP1,PSMA2,PSMB8,PTPN6,RAD51,RAD54L,RCC1,ROR1,RRM2,RRM2B,SALL3,SH2B3,SLC29A2,SNRP…	82
Hematological Disease	hematological neoplasia	2.78E-03	ATP1A1,AURKA,AURKB,BAX,BCAT1,BIRC5,CARD11,CCNB1,CD40,CD55,CD74,CDC20,CDC25A,CDCP1,CHAF1A,CHEK2,CSE1L,DIAPH1,DPP4,DUSP5,EIF4EBP1,F11R,FEN1,FOXM1,FOXO1,G3BP1,GLI1,GPX3,GSTP1,HLA-A,HLA-DRA,HMOX1,HPRT1,HSPD1,ITGA6,JARID2,KDM2B,LCK,LDHA,LSM3,LYN,MSH2,MYC,NPM1,PARP1,PDIA6,PIM1,PIM2,PLCG2,POLA1,POLD1,POLE,POLE2,PPAT,PRIM1,PSIP1,PSMA2,PSMB8,PTPN6,RAD51,RAD54L,RCC1,ROR1,RRM2,RRM2B,SALL3,SH2B3,SLC29A2,SNRP…	82
Cell Cycle	arrest in interphase of tumor cell lines	2.80E-03	CCNA2,CCNB1,CCNE1,CCNG1,CD40,CDC25A,CDC25C,CDCA2,CHEK1,CHEK2,CSE1L,DPP4,ERBB2,FOXM1,FOXO1,GNL3,MASTL,MSH2,MYBL2,MYC,ORC3,PLAU,PLK1,PRDM5,RRM2B,TFRC,TP53,TRAF2,WEE1	29
Cell Morphology	transmembrane potential of mitochondria	2.89E-03	BAX,BIRC5,CD4,CD40,CHEK2,HSPA4,HSPD1,LCK,LDHA,LYN,MYC,PARP1,PHB,PIM1,PMAIP1,PTPN6,PYCARD,TNFRSF10A,TP53	19
Cellular Function and Maintenance	transmembrane potential of mitochondria	2.89E-03	BAX,BIRC5,CD4,CD40,CHEK2,HSPA4,HSPD1,LCK,LDHA,LYN,MYC,PARP1,PHB,PIM1,PMAIP1,PTPN6,PYCARD,TNFRSF10A,TP53	19
Cellular Growth and Proliferation	colony formation	2.89E-03	BIRC5,CABLES1,CCNB1,CD4,CDCA7,CDCA7L,CHEK1,CLDN4,E2F8,EIF4EBP1,ELF3,ENO1,EPCAM,ERBB2,ERBB3,EZR,FEN1,FOXM1,GLI1,GRB7,HMGA1,HMGA2,HPN,LAPTM4B,MST4,MYC,MYCBP,NANOG,PHB,PLA2G16,PLAU,PLK1,RRM2,SALL2,SFRP1,SLC3A2,TERT,TP53,TRIM22	39
Developmental Disorder	arrhythmogenic right ventricular dysplasia	3.01E-03	DSC2,DSG2,DSP,RPSA	4
Cardiovascular Disease	arrhythmogenic right ventricular dysplasia	3.01E-03	DSC2,DSG2,DSP,RPSA	4
Cellular Growth and Proliferation	colony formation of brain cancer cell lines	3.01E-03	CDCA7L,ERBB2,MYC,PLAU	4
DNA Replication, Recombination, and Repair	condensation of mitotic chromosomes	3.01E-03	CDCA5,NCAPH,SMC2,SMC4	4
Cell Cycle	mitosis of bone cancer cell lines	3.01E-03	CDC25C,FOXM1,PKMYT1,TP53	4
Organismal Development	growth of Influenza A virus	3.10E-03	CSE1L,FGFR4,MID1IP1,ST6GAL1,TMPRSS2	5
Cancer	transformation of breast cell lines	3.10E-03	CDC25A,ELF3,MYC,SFRP1,TP53	5
Cancer	epithelial neoplasia	3.11E-03	ACP5,ACTC1,ACY1,ADAMTS19,ADAMTS8,ADCY2,ADM,ADSL,AHCY,AIM1,AKAP1,ALDH16A1,ALDH1B1,ALG1,ALPL,ALYREF,ANAPC1,ANKRD24,ANLN,ANO1,APOC1,APOE,ARHGAP11A,ARHGEF5,ARL2,ASF1B,ATAD3A/ATAD3B,ATIC,ATP1A1,AURKA,AURKB,BAX,BEND4,BIRC5,BRCA2,BRIP1,BST2,BUB1,BUB1B,C10orf82,C11orf48,C11orf82,C18orf54,C1orf94,C6orf211,C9orf64,CAD,CAMTA1,CARD11,CBLC,CBS,CCDC150,CCKBR,CCNA2,CCNB1,CCNB2,CCNC,CCNE1,CCNF,CCNJL,CCT5,CD55,CD…	519
Cell Cycle	M phase of cervical cancer cell lines	3.18E-03	CD2AP,CDT1,DIAPH3,KIF14,KIF20A,KIF23,KIFC1,MASTL,NPM1,PLK1,TERF1	11
Cell Cycle	DNA damage checkpoint	3.31E-03	CHEK1,CHEK2,CLSPN,GMNN,TP53,USP28	6
DNA Replication, Recombination, and Repair	DNA damage checkpoint	3.31E-03	CHEK1,CHEK2,CLSPN,GMNN,TP53,USP28	6
Hematological Disease	Fanconi's anemia	3.31E-03	BRCA2,BRIP1,FANCA,FANCB,FANCD2,FANCI	6
Developmental Disorder	Fanconi's anemia	3.31E-03	BRCA2,BRIP1,FANCA,FANCB,FANCD2,FANCI	6
Hereditary Disorder	Fanconi's anemia	3.31E-03	BRCA2,BRIP1,FANCA,FANCB,FANCD2,FANCI	6
Cell Morphology	multinucleation of cells	3.31E-03	AURKB,CCNE1,DIAPH3,KIF14,KIF23,TP53	6
Cellular Compromise	multinucleation of cells	3.31E-03	AURKB,CCNE1,DIAPH3,KIF14,KIF23,TP53	6
Cell Death and Survival	cell death of colon cancer cell lines	3.52E-03	BAX,BIRC5,CCNB1,CDC20,CHEK1,CHEK2,CSE1L,CYCS,DSG2,ERBB2,FLT1,FOXO1,GSTP1,HMGA1,HMOX1,HSPD1,IGF2BP1,LTBR,MELK,MLKL,MYC,PARP1,PRKCD,PYCARD,ST6GAL1,TERT,TNFRSF10A,TP53,TTK,WEE1,XRCC5	31
Cell Cycle	G1 phase of bone cancer cell lines	3.72E-03	CCNE1,FOXM1,GJA1,GNL3,MYBL2,MYC,ORC3,TP53	8
Cell Cycle	arrest in G2/M phase of tumor cell lines	3.72E-03	CDC25C,CHEK1,CHEK2,CSE1L,FOXM1,PRDM5,TRAF2,WEE1	8
Cell Cycle	entry into interphase of tumor cell lines	3.72E-03	CDC25A,CDH1,E2F8,FOXM1,HMOX1,MCM10,TP53,WEE1	8
Cellular Response to Therapeutics	radiosensitivity of cells	3.72E-03	BAX,ERBB3,NPM1,PARP1,TERT,TP53,TRAF2,XRCC5	8
Cell Cycle	arrest in G1/S phase transition	3.72E-03	CDC25A,CDC6,ERBB2,FOXM1,GMNN,MYC,TP53	7
Cellular Assembly and Organization	organization of nucleus	3.72E-03	CENPH,CHAF1A,HMGA2,MYC,NPM1,NUP155,SUV39H1	7
Cellular Function and Maintenance	organization of nucleus	3.72E-03	CENPH,CHAF1A,HMGA2,MYC,NPM1,NUP155,SUV39H1	7
Cancer	glandular intraepithelial neoplasm	3.75E-03	ACTC1,AURKA,AURKB,CD74,CDH3,GPX3,KRT7,MFGE8,PRKCD,PSAT1,SLC16A5,SMS,TP53,WFDC2	14
Cancer	lymphohematopoietic cancer	3.83E-03	AURKA,AURKB,BAX,BCAT1,BIRC5,CARD11,CCNB1,CD40,CD55,CD74,CDC20,CDC25A,CDCP1,CHAF1A,CHEK2,CSE1L,DIAPH1,DPP4,DUSP5,EIF4EBP1,F11R,FEN1,FOXM1,FOXO1,G3BP1,GLI1,GPX3,GSTP1,HLA-A,HLA-DRA,HMOX1,HPRT1,HSPD1,ITGA6,JARID2,KDM2B,LARS2,LCK,LDHA,LSM3,LYN,MSH2,MT-ND1,MYC,NPM1,PARP1,PDIA6,PIM1,PIM2,PLCG2,POLA1,POLD1,POLE,POLE2,PPAT,PRIM1,PSIP1,PSMA2,PSMB8,PTPN6,RAD51,RAD54L,RCC1,ROR1,RPL13A,RRM2,RRM2B,SALL3,SH2B3…	84
Cell Death and Survival	cell viability of carcinoma cell lines	3.90E-03	BIRC5,CHEK1,ERBB2,ERBB3,HMOX1,HTATIP2,IKBKE,PARP1,PIK3R2,PMAIP1,POU5F1,TP53	12
Cell Cycle	G2/M phase of breast cancer cell lines	4.15E-03	CDC25C,CHEK1,MSH2,PRDM5,WEE1	5
Cell Death and Survival	apoptosis of melanoma cells	4.15E-03	CDH1,PMAIP1,RPS6KA1,TERT,TP53	5
Tumor Morphology	apoptosis of melanoma cells	4.15E-03	CDH1,PMAIP1,RPS6KA1,TERT,TP53	5
Cell Cycle	arrest in G2 phase of breast cancer cell lines	4.15E-03	CDC25C,CHEK1,PRDM5,TP53,WEE1	5
Cellular Assembly and Organization	length of telomeres	4.15E-03	HMGA2,MYC,PINX1,TERF1,TERT	5
Cellular Function and Maintenance	length of telomeres	4.15E-03	HMGA2,MYC,PINX1,TERF1,TERT	5
Cell Cycle	senescence of fibroblasts	4.15E-03	BLM,MYBL2,NPM1,TERT,TP53	5
Connective Tissue Development and Function	senescence of fibroblasts	4.15E-03	BLM,MYBL2,NPM1,TERT,TP53	5
Cellular Development	senescence of fibroblasts	4.15E-03	BLM,MYBL2,NPM1,TERT,TP53	5
Cell Cycle	G2 phase of breast cancer cell lines	4.17E-03	CDC25C,CHEK1,MSH2,PRDM5,TP53,WEE1	6
Cancer	neoplasia of tumor cell lines	4.35E-03	CDC25A,CKS1B,DPP4,ERBB2,HTATIP2,MST4,MYC,PARP1,PIM1,PPAP2A,ST14,TERT	12
Cellular Growth and Proliferation	neoplasia of tumor cell lines	4.35E-03	CDC25A,CKS1B,DPP4,ERBB2,HTATIP2,MST4,MYC,PARP1,PIM1,PPAP2A,ST14,TERT	12
Cellular Development	neoplasia of tumor cell lines	4.35E-03	CDC25A,CKS1B,DPP4,ERBB2,HTATIP2,MST4,MYC,PARP1,PIM1,PPAP2A,ST14,TERT	12
Cancer	cholangiocarcinoma	4.38E-03	ACY1,EPCAM,ERBB2,ERBB3,HSP90AB1,PLAU,RPL13A,RPL9	8
Gastrointestinal Disease	cholangiocarcinoma	4.38E-03	ACY1,EPCAM,ERBB2,ERBB3,HSP90AB1,PLAU,RPL13A,RPL9	8
Hepatic System Disease	cholangiocarcinoma	4.38E-03	ACY1,EPCAM,ERBB2,ERBB3,HSP90AB1,PLAU,RPL13A,RPL9	8
Organismal Survival	survival of organism	4.43E-03	APOE,AURKB,CDC25A,CDH1,ERBB2,ERBB3,FOXM1,FOXO1,GLDC,HMGA2,KIF14,MYC,PIK3R2,SRSF2,TNNT2,TP53	16
Cell Cycle	DNA replication checkpoint of cells	4.46E-03	CENPE,CHEK1	2
DNA Replication, Recombination, and Repair	DNA replication checkpoint of cells	4.46E-03	CENPE,CHEK1	2
Cancer	Li-Fraumeni syndrome	4.46E-03	CHEK2,TP53	2
Hereditary Disorder	Li-Fraumeni syndrome	4.46E-03	CHEK2,TP53	2
Cell Cycle	S phase checkpoint control of embryonic cell lines	4.46E-03	CKS1B,CKS2	2
DNA Replication, Recombination, and Repair	S phase checkpoint control of embryonic cell lines	4.46E-03	CKS1B,CKS2	2
Embryonic Development	S phase checkpoint control of embryonic cell lines	4.46E-03	CKS1B,CKS2	2
Cell Cycle	S phase checkpoint control of epithelial cell lines	4.46E-03	CKS1B,CKS2	2
DNA Replication, Recombination, and Repair	S phase checkpoint control of epithelial cell lines	4.46E-03	CKS1B,CKS2	2
Cell Cycle	S phase checkpoint control of kidney cell lines	4.46E-03	CKS1B,CKS2	2
DNA Replication, Recombination, and Repair	S phase checkpoint control of kidney cell lines	4.46E-03	CKS1B,CKS2	2
Tissue Development	aggregation of melanoma cell lines	4.46E-03	CDH1,CDH3	2
Cell Cycle	arrest in G2 phase of fibroblast cell lines	4.46E-03	ERBB2,TP53	2
Connective Tissue Development and Function	arrest in G2 phase of fibroblast cell lines	4.46E-03	ERBB2,TP53	2
Cellular Assembly and Organization	attachment of chromosomes	4.46E-03	AURKB,BUB1B	2
Cellular Assembly and Organization	binding of chromosomes	4.46E-03	KIF22,RAN	2
Gene Expression	binding of ribosomal gene cluster sequence	4.46E-03	PTTG1,TP53	2
Cell Cycle	checkpoint control of lymphoma cell lines	4.46E-03	CHEK1,CHEK2	2
DNA Replication, Recombination, and Repair	checkpoint control of lymphoma cell lines	4.46E-03	CHEK1,CHEK2	2
Cellular Assembly and Organization	cohesion of centromeres	4.46E-03	BUB1,SGOL1	2
Cellular Growth and Proliferation	colony formation of B-lymphocyte derived cell lines	4.46E-03	CDCA7,MYC	2
Hematological System Development and Function	colony formation of B-lymphocyte derived cell lines	4.46E-03	CDCA7,MYC	2
RNA Post-Transcriptional Modification	decapping of RNA	4.46E-03	DCP2,PABPC1	2
Cellular Development	dedifferentiation of colon cancer cell lines	4.46E-03	ERBB2,ERBB3	2
Cancer	formation of lymphoma cells	4.46E-03	MYC,TRAF2	2
Cellular Growth and Proliferation	formation of lymphoma cells	4.46E-03	MYC,TRAF2	2
Immunological Disease	icf syndrome	4.46E-03	DNMT3B,ZBTB24	2
Hereditary Disorder	icf syndrome	4.46E-03	DNMT3B,ZBTB24	2
Cell-To-Cell Signaling and Interaction	interaction of colon cancer cell lines	4.46E-03	ERBB2,ERBB3	2
Cellular Assembly and Organization	missegregation of sister chromatids	4.46E-03	BUB1,SGOL1	2
Cell Morphology	multinucleation of breast cancer cell lines	4.46E-03	CCNE1,TP53	2
Cellular Compromise	multinucleation of breast cancer cell lines	4.46E-03	CCNE1,TP53	2
Tissue Development	organization of luminal epithelial cells	4.46E-03	DSC2,DSG2	2
Cellular Function and Maintenance	organization of luminal epithelial cells	4.46E-03	DSC2,DSG2	2
Tissue Development	organization of myoepithelial cells	4.46E-03	DSC2,DSG2	2
Cellular Function and Maintenance	organization of myoepithelial cells	4.46E-03	DSC2,DSG2	2
Skeletal and Muscular System Development and Function	organization of myoepithelial cells	4.46E-03	DSC2,DSG2	2
Cell Cycle	polyploidization of colon cancer cell lines	4.46E-03	BUB1B,XRCC5	2
DNA Replication, Recombination, and Repair	quantity of nucleoprotein filaments	4.46E-03	BRCA2,RAD51	2
Cellular Assembly and Organization	quantity of nucleoprotein filaments	4.46E-03	BRCA2,RAD51	2
Cell Cycle	re-entry into cell cycle progression of carcinoma cell lines	4.46E-03	TERT,TP53	2
Cell Cycle	re-entry into cell cycle progression of thyroid tumor cell lines	4.46E-03	TERT,TP53	2
Infectious Disease	replication of Human papillomavirus type 11	4.46E-03	POLA1,POLA2	2
Cell Cycle	replication of leukemia cell lines	4.46E-03	CCNE1,CDC6	2
Cancer	tumorigenesis of cancer stem cells	4.46E-03	GLDC,LIN28B	2
Cellular Growth and Proliferation	tumorigenesis of cancer stem cells	4.46E-03	GLDC,LIN28B	2
Cellular Development	tumorigenesis of cancer stem cells	4.46E-03	GLDC,LIN28B	2
Tumor Morphology	tumorigenesis of cancer stem cells	4.46E-03	GLDC,LIN28B	2
Amino Acid Metabolism	uptake of L-phenylalanine	4.46E-03	SLC3A2,SLC7A5	2
Small Molecule Biochemistry	uptake of L-phenylalanine	4.46E-03	SLC3A2,SLC7A5	2
Molecular Transport	uptake of L-phenylalanine	4.46E-03	SLC3A2,SLC7A5	2
Amino Acid Metabolism	uptake of L-tryptophan	4.46E-03	SLC3A2,SLC7A5	2
Small Molecule Biochemistry	uptake of L-tryptophan	4.46E-03	SLC3A2,SLC7A5	2
Molecular Transport	uptake of L-tryptophan	4.46E-03	SLC3A2,SLC7A5	2
Amino Acid Metabolism	uptake of L-tyrosine	4.46E-03	SLC3A2,SLC7A5	2
Small Molecule Biochemistry	uptake of L-tyrosine	4.46E-03	SLC3A2,SLC7A5	2
Molecular Transport	uptake of L-tyrosine	4.46E-03	SLC3A2,SLC7A5	2
Amino Acid Metabolism	uptake of leucine	4.46E-03	SLC3A2,SLC7A5	2
Small Molecule Biochemistry	uptake of leucine	4.46E-03	SLC3A2,SLC7A5	2
Molecular Transport	uptake of leucine	4.46E-03	SLC3A2,SLC7A5	2
Cell Cycle	G1 phase of epithelial cell lines	4.48E-03	CHEK2,ERBB2,MYC,PIM1	4
Hair and Skin Development and Function	G1 phase of epithelial cell lines	4.48E-03	CHEK2,ERBB2,MYC,PIM1	4
Hematological System Development and Function	activation of cytotoxic T cells	4.48E-03	ERBB2,HLA-A,PMEL,TP53	4
Cell-To-Cell Signaling and Interaction	activation of cytotoxic T cells	4.48E-03	ERBB2,HLA-A,PMEL,TP53	4
Immune Cell Trafficking	activation of cytotoxic T cells	4.48E-03	ERBB2,HLA-A,PMEL,TP53	4
Inflammatory Response	activation of cytotoxic T cells	4.48E-03	ERBB2,HLA-A,PMEL,TP53	4
Cell Cycle	arrest in G2 phase of bone cancer cell lines	4.48E-03	CHEK1,FOXM1,TP53,WEE1	4
Cell Cycle	arrest in G2/M phase of breast cancer cell lines	4.48E-03	CDC25C,CHEK1,PRDM5,WEE1	4
Cell Cycle	delay in initiation of G1/S phase transition	4.48E-03	CCNE1,CHEK2,MX2,NASP	4
Cellular Movement	migration of skin cancer cell lines	4.48E-03	CARD10,CDH1,GRB7,LAMC2	4
Cell Cycle	premature senescence of tumor cell lines	4.48E-03	DDB2,DEK,EIF4EBP1,ERBB2	4
Tumor Morphology	progression of carcinoma	4.48E-03	APOE,ERBB2,ERBB3,GSTP1	4
Cancer	carcinoma	4.60E-03	ACP5,ACTC1,ACY1,ADAMTS19,ADAMTS8,ADCY2,ADM,ADSL,AHCY,AIM1,AKAP1,ALDH16A1,ALDH1B1,ALG1,ALPL,ALYREF,ANAPC1,ANKRD24,ANLN,ANO1,APOC1,APOE,ARHGAP11A,ARHGEF5,ARL2,ASF1B,ATAD3A/ATAD3B,ATIC,AURKA,AURKB,BAX,BEND4,BIRC5,BRCA2,BRIP1,BST2,BUB1,BUB1B,C10orf82,C11orf48,C11orf82,C18orf54,C1orf94,C6orf211,C9orf64,CAD,CAMTA1,CARD11,CBLC,CBS,CCDC150,CCKBR,CCNA2,CCNB1,CCNB2,CCNC,CCNE1,CCNF,CCNJL,CCT5,CD55,CD74,CD9,…	511
Cancer	hematologic cancer	4.63E-03	AURKA,AURKB,BAX,BCAT1,CD55,CD74,CDC20,CDC25A,CDCP1,CHAF1A,CHEK2,DIAPH1,DPP4,F11R,FEN1,FOXM1,FOXO1,G3BP1,GPX3,GSTP1,HLA-A,HLA-DRA,HMOX1,HPRT1,HSPD1,ITGA6,JARID2,LCK,LDHA,LSM3,LYN,MSH2,MYC,NPM1,PARP1,PDIA6,PIM2,PLCG2,POLA1,POLD1,POLE,POLE2,PPAT,PRIM1,PSIP1,PSMA2,PSMB8,PTPN6,RAD51,RCC1,ROR1,RRM2,RRM2B,SH2B3,SNRPD3,SRSF2,TEK,TERT,TET1,TNFRSF10A,TNFSF11,TP53,TUBA4A	63
Hematological Disease	hematologic cancer	4.63E-03	AURKA,AURKB,BAX,BCAT1,CD55,CD74,CDC20,CDC25A,CDCP1,CHAF1A,CHEK2,DIAPH1,DPP4,F11R,FEN1,FOXM1,FOXO1,G3BP1,GPX3,GSTP1,HLA-A,HLA-DRA,HMOX1,HPRT1,HSPD1,ITGA6,JARID2,LCK,LDHA,LSM3,LYN,MSH2,MYC,NPM1,PARP1,PDIA6,PIM2,PLCG2,POLA1,POLD1,POLE,POLE2,PPAT,PRIM1,PSIP1,PSMA2,PSMB8,PTPN6,RAD51,RCC1,ROR1,RRM2,RRM2B,SH2B3,SNRPD3,SRSF2,TEK,TERT,TET1,TNFRSF10A,TNFSF11,TP53,TUBA4A	63
Cancer	neuroendocrine tumor	5.03E-03	APOC1,ATP1A1,BIRC5,BRCA2,CD74,CDH1,CDH3,CYBA,DKC1,ENO1,ERBB2,ERBB3,FGFR4,FLT1,FLT4,GAL,GLI1,GSTP1,HLA-DRA,HSD11B2,IDO1,KIAA0101,KRT19,KRT7,MRPL37,PABPC3,PLAU,POLE,POLE2,PRKCD,RAD54L,RRM2,RRM2B,TNFRSF10A,TP53,XRCC2,ZBTB7B	37
Neurological Disease	Aicardi-Goutieres syndrome	5.11E-03	RNASEH2A,RNASEH2B,SAMHD1	3
Hereditary Disorder	Aicardi-Goutieres syndrome	5.11E-03	RNASEH2A,RNASEH2B,SAMHD1	3
Psychological Disorders	Aicardi-Goutieres syndrome	5.11E-03	RNASEH2A,RNASEH2B,SAMHD1	3
Cell Cycle	arrest in G1 phase of lymphoma cell lines	5.11E-03	CD40,TFRC,TP53	3
Cell Death and Survival	cell survival of lung cancer cell lines	5.11E-03	IKBKE,PARP1,TP53	3
Cell Cycle	delay in initiation of S phase	5.11E-03	FANCD2,FEN1,POLA1	3
Cancer	extrahepatic bile duct cancer	5.11E-03	POLE,POLE2,RRM2	3
Gastrointestinal Disease	extrahepatic bile duct cancer	5.11E-03	POLE,POLE2,RRM2	3
Hepatic System Disease	extrahepatic bile duct cancer	5.11E-03	POLE,POLE2,RRM2	3
Cellular Movement	invasion of skin cell lines	5.11E-03	CDH1,GJA1,PLAU	3
Cell Cycle	mitotic exit	5.11E-03	BIRC5,CDC20,WEE1	3
Cell Morphology	morphology of ovarian cancer cell lines	5.11E-03	CD9,DPP4,ERBB2	3
Cell Cycle	polyploidization of tumor cell lines	5.11E-03	AURKB,BUB1B,XRCC5	3
DNA Replication, Recombination, and Repair	progression of replication fork	5.11E-03	CLSPN,RAD51,TIMELESS	3
Nucleic Acid Metabolism	synthesis of purine base	5.11E-03	PAICS,PNP,SHMT1	3
Small Molecule Biochemistry	synthesis of purine base	5.11E-03	PAICS,PNP,SHMT1	3
Nucleic Acid Metabolism	synthesis of purine nucleotide	5.15E-03	ADSL,ADSS,APOE,CCNB1,HMOX1,HPRT1,HSPD1,NPR1,PPAT,SLC25A13,TP53	11
Small Molecule Biochemistry	synthesis of purine nucleotide	5.15E-03	ADSL,ADSS,APOE,CCNB1,HMOX1,HPRT1,HSPD1,NPR1,PPAT,SLC25A13,TP53	11
Cell Cycle	cell cycle progression of bone cancer cell lines	5.18E-03	CCNG1,CLSPN,MYC,PLK1,TP53,WEE1	6
Cell Death and Survival	apoptosis of lymphoma cell lines	5.21E-03	A4GALT,BIRC5,CD40,CD55,CHEK2,DUT,EZR,FOXO1,GGT1,IDO1,LYN,MYC,NCL,PMAIP1,PTPN6,ST6GAL1,TNFRSF8,TP53	18
Cell Cycle	arrest in interphase of breast cancer cell lines	5.37E-03	CCNG1,CDC25A,CDC25C,CHEK1,ERBB2,MYC,PRDM5,TP53,WEE1	9
Cellular Growth and Proliferation	generation of cells	5.37E-03	ARTN,DIAPH2,DMC1,FLT1,GRHL2,M1AP,MYC,TNFSF11,USP9X	9
Tissue Development	generation of cells	5.37E-03	ARTN,DIAPH2,DMC1,FLT1,GRHL2,M1AP,MYC,TNFSF11,USP9X	9
Cell Death and Survival	apoptosis of lymphoblastoid cell lines	5.37E-03	BAX,BLM,CCNE1,LIG1,NPM1,TERF1,TP53	7
Cellular Response to Therapeutics	radiosensitivity of tumor cell lines	5.37E-03	BAX,ERBB3,NPM1,PARP1,TP53,TRAF2,XRCC5	7
Post-Translational Modification	tetramerization of protein	5.37E-03	AASS,ADSL,GPX3,HPRT1,SHMT1,TK1,TP53	7
Protein Synthesis	tetramerization of protein	5.37E-03	AASS,ADSL,GPX3,HPRT1,SHMT1,TK1,TP53	7
Cellular Assembly and Organization	cohesion of sister chromatids	5.44E-03	CHEK1,DDX11,ESCO2,NAA50,PLK1	5
Cellular Assembly and Organization	formation of nucleus	5.44E-03	ESPL1,NOLC1,NUP107,TMEM48,TP53	5
Cellular Growth and Proliferation	colony formation of cells	5.50E-03	BIRC5,CABLES1,CD4,CDCA7,CDCA7L,CHEK1,CLDN4,E2F8,EIF4EBP1,ELF3,ENO1,EPCAM,ERBB2,ERBB3,EZR,FEN1,GLI1,GRB7,HMGA1,HMGA2,HPN,LAPTM4B,MST4,MYC,MYCBP,NANOG,PHB,PLA2G16,PLAU,PLK1,RRM2,SALL2,SFRP1,SLC3A2,TERT,TP53,TRIM22	37
Post-Translational Modification	phosphorylation of L-amino acid	5.98E-03	CD74,CHEK1,EPHA1,FLT1,FLT4,LYN,PRKCD,PTPN6,TDGF1,TEK,THBS4,TP53	12
Amino Acid Metabolism	phosphorylation of L-amino acid	5.98E-03	CD74,CHEK1,EPHA1,FLT1,FLT4,LYN,PRKCD,PTPN6,TDGF1,TEK,THBS4,TP53	12
Small Molecule Biochemistry	phosphorylation of L-amino acid	5.98E-03	CD74,CHEK1,EPHA1,FLT1,FLT4,LYN,PRKCD,PTPN6,TDGF1,TEK,THBS4,TP53	12
Cancer	tumorigenesis of tumor cell lines	6.03E-03	CKS1B,DPP4,ERBB2,MST4,MYC,PARP1,PIM1,PPAP2A,ST14,TERT	10
Cellular Growth and Proliferation	tumorigenesis of tumor cell lines	6.03E-03	CKS1B,DPP4,ERBB2,MST4,MYC,PARP1,PIM1,PPAP2A,ST14,TERT	10
Cellular Development	tumorigenesis of tumor cell lines	6.03E-03	CKS1B,DPP4,ERBB2,MST4,MYC,PARP1,PIM1,PPAP2A,ST14,TERT	10
Cell Death and Survival	cell death of connective tissue cells	6.16E-03	ADM,BAX,BLM,CD40,CHEK1,FANCD2,FOXO1,GSTP1,HSPD1,ITGA6,LIG1,MYBL2,MYC,SFRP1,STC1,TERT,TNFRSF10A,TNFSF11,TP53,TRAF2	20
Cell Death and Survival	cell survival of tumor cell lines	6.36E-03	BRIP1,CHEK2,IKBKE,MSH2,PARP1,TP53	6
Cellular Assembly and Organization	maintenance of telomeres	6.36E-03	HMGA2,MYC,PINX1,TERF1,TERT,XRCC5	6
Cellular Function and Maintenance	maintenance of telomeres	6.36E-03	HMGA2,MYC,PINX1,TERF1,TERT,XRCC5	6
Cellular Assembly and Organization	organization of mitotic spindle	6.36E-03	CCNB1,KIF11,RAN,RCC1,SPC25,TTK	6
Cellular Function and Maintenance	organization of mitotic spindle	6.36E-03	CCNB1,KIF11,RAN,RCC1,SPC25,TTK	6
Cancer	cervical intraepithelial neoplasia	6.36E-03	DMC1,DUT,ITGA6,TMC6	4
Reproductive System Disease	cervical intraepithelial neoplasia	6.36E-03	DMC1,DUT,ITGA6,TMC6	4
DNA Replication, Recombination, and Repair	quantity of chromosomes	6.36E-03	BUB1B,CENPE,PTTG1,TERT	4
Cellular Assembly and Organization	quantity of chromosomes	6.36E-03	BUB1B,CENPE,PTTG1,TERT	4
Cell Cycle	arrest in G1 phase of bone cancer cell lines	6.39E-03	CCNE1,FOXM1,GNL3,MYBL2,MYC,ORC3,TP53	7
Cell Cycle	cycling of centrosome	6.39E-03	ARHGEF10,BRCA2,NPM1,PLK1,PLK4,TP53,TTK	7
Cellular Assembly and Organization	quantity of filaments	6.39E-03	APOE,CDH1,GDPD2,KIF18B,MYC,TACC3,TP53	7
DNA Replication, Recombination, and Repair	double-stranded DNA break repair	6.43E-03	BLM,BRCA2,CDCA5,CHEK2,FEN1,MAD2L2,NPM1,PARP1,POLA1,TP53,XRCC5	11
Immunological Disease	lichen planus	6.57E-03	APOE,BAX,CD74,EIF5A,ENO1,F2RL1,GSDMD,HLA-A,HLA-C,HLA-DPA1,HLA-DPB1,HLA-DQB1,HLA-DRA,PFN1	14
Dermatological Diseases and Conditions	lichen planus	6.57E-03	APOE,BAX,CD74,EIF5A,ENO1,F2RL1,GSDMD,HLA-A,HLA-C,HLA-DPA1,HLA-DPB1,HLA-DQB1,HLA-DRA,PFN1	14
Inflammatory Disease	lichen planus	6.57E-03	APOE,BAX,CD74,EIF5A,ENO1,F2RL1,GSDMD,HLA-A,HLA-C,HLA-DPA1,HLA-DPB1,HLA-DQB1,HLA-DRA,PFN1	14
Cancer	head and neck cancer	6.89E-03	ACY1,ADSL,AIM1,AKAP1,ANO1,ATIC,AURKA,BAX,BRCA2,CDCA7L,CDH1,DKC1,EPCAM,ERBB2,ERBB3,EZR,FABP5,FANCD2,FGF19,FGFR4,FLT1,FLT4,FZD5,FZD7,GALNT3,GJA1,GLI1,GSTP1,HSD11B2,HSP90AB1,HTR1A,KRT19,LAMC2,LDHA,LTBR,LYN,MSH2,MT-ND1,MT-ND2,MYC,NTHL1,PARP1,PDPN,POU5F1,PTTG1,PYCARD,RAB25,RAD51,SLC25A5,SLC9A3R1,SOCS1,TEK,TERF1,TERT,THY1,TP53,TPCN2,TUBA4A,VRK2,ZBTB7B	60
Cell Death and Survival	cell death of ovarian cancer cell lines	6.96E-03	BIRC5,BRCA2,CSE1L,ERBB2,MYC,NACC1,PLA2G16,PMAIP1,PRDM5,SALL2,SLC3A2,TERT,TP53,WEE1,YARS	15
Amino Acid Metabolism	transport of amino acids	7.00E-03	SLC1A5,SLC25A13,SLC3A2,SLC43A1,SLC5A6,SLC7A3,SLC7A5,SLC7A8,TP53	9
Small Molecule Biochemistry	transport of amino acids	7.00E-03	SLC1A5,SLC25A13,SLC3A2,SLC43A1,SLC5A6,SLC7A3,SLC7A5,SLC7A8,TP53	9
Molecular Transport	transport of amino acids	7.00E-03	SLC1A5,SLC25A13,SLC3A2,SLC43A1,SLC5A6,SLC7A3,SLC7A5,SLC7A8,TP53	9
Cancer	non-Hodgkin's disease	7.14E-03	AURKB,BIRC5,CARD11,CCNB1,CSE1L,DPP4,DUSP5,EIF4EBP1,FOXO1,GLI1,KDM2B,MYC,PIM1,PIM2,POLA1,POLD1,POLE,RAD54L,ROR1,RRM2,SALL3,SLC29A2,SOCS1,TCF7L1,TNFRSF10A,TNFRSF8,TNFSF11,TP53,TPST2,TUBA4A	30
Hematological Disease	non-Hodgkin's disease	7.14E-03	AURKB,BIRC5,CARD11,CCNB1,CSE1L,DPP4,DUSP5,EIF4EBP1,FOXO1,GLI1,KDM2B,MYC,PIM1,PIM2,POLA1,POLD1,POLE,RAD54L,ROR1,RRM2,SALL3,SLC29A2,SOCS1,TCF7L1,TNFRSF10A,TNFRSF8,TNFSF11,TP53,TPST2,TUBA4A	30
Cancer	head and neck tumor	7.64E-03	ACY1,ADSL,AIM1,AKAP1,ALYREF,ANO1,ATIC,AURKA,BAX,BIRC5,BRCA2,CDCA7L,CDH1,DKC1,EPCAM,ERBB2,ERBB3,EZR,FABP5,FANCD2,FGF19,FGFR4,FLT1,FLT4,FZD5,FZD7,GALNT3,GJA1,GLI1,GSTP1,HSD11B2,HSP90AB1,HTR1A,KRT19,LAMC2,LDHA,LTBR,LYN,MSH2,MT-ND1,MT-ND2,MYC,NTHL1,PARP1,PDPN,POU5F1,PTTG1,PYCARD,RAB25,RAD51,SLC25A5,SLC9A3R1,SOCS1,TEK,TERF1,TERT,THY1,TP53,TPCN2,TUBA4A,VRK2,ZBTB7B	62
DNA Replication, Recombination, and Repair	degradation of DNA fragment	7.72E-03	BAX,CECR2,CYCS,PPT1,REXO2,SFRP1	6
Connective Tissue Disorders	microcephaly	7.72E-03	CDC6,CDT1,KIF11,ORC1,ORC6,SLC25A19	6
Developmental Disorder	microcephaly	7.72E-03	CDC6,CDT1,KIF11,ORC1,ORC6,SLC25A19	6
Neurological Disease	microcephaly	7.72E-03	CDC6,CDT1,KIF11,ORC1,ORC6,SLC25A19	6
Organismal Injury and Abnormalities	microcephaly	7.72E-03	CDC6,CDT1,KIF11,ORC1,ORC6,SLC25A19	6
Skeletal and Muscular Disorders	microcephaly	7.72E-03	CDC6,CDT1,KIF11,ORC1,ORC6,SLC25A19	6
RNA Post-Transcriptional Modification	processing of RNA	7.87E-03	C1QBP,DDX54,DKC1,ESRP1,ESRP2,HEATR1,HNRNPF,HNRNPM,LSM3,NOLC1,NOP56,NOP58,NPM1,PABPC1,PPAN,PTBP1,RBM38,RBPMS,SNRPD1,SNRPD2,SNRPN,SRSF2,SRSF7,UTP20,WDR12,WDR43	26
DNA Replication, Recombination, and Repair	catabolism of nucleoside triphosphate	7.94E-03	ACTC1,BLM,DNA2,ENPP1,KIF20B,MSH2,MSH6,NUDT1,TNNT2	9
Nucleic Acid Metabolism	catabolism of nucleoside triphosphate	7.94E-03	ACTC1,BLM,DNA2,ENPP1,KIF20B,MSH2,MSH6,NUDT1,TNNT2	9
Small Molecule Biochemistry	catabolism of nucleoside triphosphate	7.94E-03	ACTC1,BLM,DNA2,ENPP1,KIF20B,MSH2,MSH6,NUDT1,TNNT2	9
Cellular Movement	invasion of prostate cancer cell lines	7.96E-03	ARHGAP4,CDH1,CTSZ,ERBB3,EZR,FABP5,HMOX1,HPN,PLAU,PODXL,PRKCD	11
Cancer	serous ovarian carcinoma process	7.98E-03	ACP5,APOE,CLDN3,CLDN7,CTNNAL1,DPP4,EPCAM,GINS1,GPX3,HPS3,KCNK6,MTFR2,OCLN,PPAP2A,SMC4,SPINT2,WFDC2	17
Reproductive System Disease	serous ovarian carcinoma process	7.98E-03	ACP5,APOE,CLDN3,CLDN7,CTNNAL1,DPP4,EPCAM,GINS1,GPX3,HPS3,KCNK6,MTFR2,OCLN,PPAP2A,SMC4,SPINT2,WFDC2	17
Endocrine System Disorders	serous ovarian carcinoma process	7.98E-03	ACP5,APOE,CLDN3,CLDN7,CTNNAL1,DPP4,EPCAM,GINS1,GPX3,HPS3,KCNK6,MTFR2,OCLN,PPAP2A,SMC4,SPINT2,WFDC2	17
Cancer	lymphatic node tumor	8.30E-03	AURKB,BIRC5,CARD11,CCNB1,CD40,CSE1L,DPP4,DUSP5,EIF4EBP1,FOXO1,GLI1,KDM2B,MYC,PIM1,PIM2,POLA1,POLD1,POLE,RAD54L,ROR1,RRM2,SALL3,SLC29A2,SOCS1,TCF7L1,TNFRSF10A,TNFRSF8,TNFSF11,TP53,TPST2,TUBA4A	31
Post-Translational Modification	assembly of protein-protein complex	8.43E-03	CD2AP,CD40,CHAF1A,CHAF1B,CYBA,FANCA,HMGA1,NUP107,NUP205,OCLN,SLC9A3R1,TFAP4,TMEM48,TP53,TRAF2,VIL1	16
Protein Synthesis	assembly of protein-protein complex	8.43E-03	CD2AP,CD40,CHAF1A,CHAF1B,CYBA,FANCA,HMGA1,NUP107,NUP205,OCLN,SLC9A3R1,TFAP4,TMEM48,TP53,TRAF2,VIL1	16
Cell Signaling	assembly of protein-protein complex	8.43E-03	CD2AP,CD40,CHAF1A,CHAF1B,CYBA,FANCA,HMGA1,NUP107,NUP205,OCLN,SLC9A3R1,TFAP4,TMEM48,TP53,TRAF2,VIL1	16
Cancer	Hereditary Nonpolyposis Colorectal Cancer	8.50E-03	EPCAM,MSH2,MSH6	3
Gastrointestinal Disease	Hereditary Nonpolyposis Colorectal Cancer	8.50E-03	EPCAM,MSH2,MSH6	3
Hereditary Disorder	Hereditary Nonpolyposis Colorectal Cancer	8.50E-03	EPCAM,MSH2,MSH6	3
Post-Translational Modification	assembly of Nuclear pore	8.50E-03	NUP107,NUP205,TMEM48	3
Protein Synthesis	assembly of Nuclear pore	8.50E-03	NUP107,NUP205,TMEM48	3
Cell Signaling	assembly of Nuclear pore	8.50E-03	NUP107,NUP205,TMEM48	3
Infectious Disease	attachment of virus	8.50E-03	BST2,DSG2,F11R	3
DNA Replication, Recombination, and Repair	breakage of chromosomes	8.50E-03	BRIP1,FANCA,MYC	3
Cellular Compromise	breakage of chromosomes	8.50E-03	BRIP1,FANCA,MYC	3
Cellular Growth and Proliferation	colony formation of embryonic cell lines	8.50E-03	EPCAM,MST4,NANOG	3
Embryonic Development	colony formation of embryonic cell lines	8.50E-03	EPCAM,MST4,NANOG	3
Developmental Disorder	dyskeratosis congenita	8.50E-03	DKC1,NOP10,TERT	3
Organismal Injury and Abnormalities	dyskeratosis congenita	8.50E-03	DKC1,NOP10,TERT	3
Dermatological Diseases and Conditions	dyskeratosis congenita	8.50E-03	DKC1,NOP10,TERT	3
Hereditary Disorder	dyskeratosis congenita	8.50E-03	DKC1,NOP10,TERT	3
Cancer	early-onset breast cancer	8.50E-03	BRCA2,BRIP1,CHEK1	3
Cardiovascular Disease	left ventricular dysfunction	8.50E-03	DSG2,DSP,TNNT2	3
Amino Acid Metabolism	metabolism of L-serine	8.50E-03	CBS,GLDC,SHMT1	3
Small Molecule Biochemistry	metabolism of L-serine	8.50E-03	CBS,GLDC,SHMT1	3
Cancer	primary peritoneal cancer	8.50E-03	BRCA2,ERBB2,TP53	3
Cellular Growth and Proliferation	proliferation of cancer stem cells	8.50E-03	ERBB2,GLDC,LIN28B	3
Cellular Development	proliferation of cancer stem cells	8.50E-03	ERBB2,GLDC,LIN28B	3
Tumor Morphology	proliferation of cancer stem cells	8.50E-03	ERBB2,GLDC,LIN28B	3
Small Molecule Biochemistry	quantity of glycosaminoglycan	8.50E-03	C1QBP,CHST6,SOD3	3
Molecular Transport	quantity of glycosaminoglycan	8.50E-03	C1QBP,CHST6,SOD3	3
Carbohydrate Metabolism	quantity of glycosaminoglycan	8.50E-03	C1QBP,CHST6,SOD3	3
DNA Replication, Recombination, and Repair	replication of plasmid DNA	8.50E-03	CDT1,GMNN,ORC1	3
Cancer	tumorigenesis of melanoma cell lines	8.50E-03	DPP4,MYC,TERT	3
Cellular Growth and Proliferation	tumorigenesis of melanoma cell lines	8.50E-03	DPP4,MYC,TERT	3
Cellular Development	tumorigenesis of melanoma cell lines	8.50E-03	DPP4,MYC,TERT	3
Cellular Growth and Proliferation	proliferation of breast cancer cell lines	8.52E-03	BIRC5,BRCA2,BUB1,C1QBP,CARD10,CCNE1,CDH1,CSE1L,DDB2,DLGAP5,ELF3,ERBB2,ERBB3,FGF19,FGFR4,FOSL1,FOXM1,FOXO1,GDF3,GJA1,GLI1,GMNN,GRB7,H2AFZ,HMGA1,MATK,MTAP,MYC,MYCBP,NANOG,NUDT1,PFN1,PIM1,PLAU,PLK1,PRDM14,PRKCD,TERT,TP53,TRAIP	40
Cellular Development	proliferation of breast cancer cell lines	8.52E-03	BIRC5,BRCA2,BUB1,C1QBP,CARD10,CCNE1,CDH1,CSE1L,DDB2,DLGAP5,ELF3,ERBB2,ERBB3,FGF19,FGFR4,FOSL1,FOXM1,FOXO1,GDF3,GJA1,GLI1,GMNN,GRB7,H2AFZ,HMGA1,MATK,MTAP,MYC,MYCBP,NANOG,NUDT1,PFN1,PIM1,PLAU,PLK1,PRDM14,PRKCD,TERT,TP53,TRAIP	40
Cell Death and Survival	cell viability of lymphoblastoid cell lines	8.71E-03	BAX,LIG1,TERF1,TP53	4
Cell Cycle	exit from mitosis	8.71E-03	ANLN,BIRC5,CCNE1,MASTL	4
Cancer	prostatic intraepithelial neoplasia	8.75E-03	ACTC1,AURKA,AURKB,CD74,CDH3,GPX3,KRT7,MFGE8,PRKCD,PSAT1,SLC16A5,SMS,WFDC2	13
Reproductive System Disease	prostatic intraepithelial neoplasia	8.75E-03	ACTC1,AURKA,AURKB,CD74,CDH3,GPX3,KRT7,MFGE8,PRKCD,PSAT1,SLC16A5,SMS,WFDC2	13
Cell Death and Survival	cell death of carcinoma cells	8.80E-03	BAX,ENO1,ERBB2,MYC,TP53	5
Tumor Morphology	cell death of carcinoma cells	8.80E-03	BAX,ENO1,ERBB2,MYC,TP53	5
Cellular Growth and Proliferation	formation of tumor cell lines	8.80E-03	ERBB2,ESPL1,KIF23,TP53,TRAF2	5
Cellular Function and Maintenance	internalization of cells	8.80E-03	ERBB2,EZR,NCL,PLEKHG6,SNX5	5
Cell Cycle	entry into S phase of tumor cell lines	8.82E-03	CDC25A,CDH1,E2F8,FOXM1,HMOX1,MCM10,TP53	7
Cancer	ductal carcinoma	8.86E-03	ACP5,BIRC5,CDH1,CDH3,CIRH1A,CYBA,ERBB2,FOSL1,MT-ND1,MT1G,RAD54L,RNASEH2A,TP53,TRAIP,USP28	15
Nucleic Acid Metabolism	metabolism of ATP	8.98E-03	ACTC1,AK4,BLM,DNA2,KIF20B,MSH2,MSH6,NUDT1,TNNT2	9
Small Molecule Biochemistry	metabolism of ATP	8.98E-03	ACTC1,AK4,BLM,DNA2,KIF20B,MSH2,MSH6,NUDT1,TNNT2	9
Energy Production	metabolism of ATP	8.98E-03	ACTC1,AK4,BLM,DNA2,KIF20B,MSH2,MSH6,NUDT1,TNNT2	9
Cell Cycle	cytokinesis of cervical cancer cell lines	9.14E-03	CD2AP,DIAPH3,KIF14,KIF20A,KIF23,KIFC1,MASTL,NPM1	8
Cellular Movement	cytokinesis of cervical cancer cell lines	9.14E-03	CD2AP,DIAPH3,KIF14,KIF20A,KIF23,KIFC1,MASTL,NPM1	8
Gastrointestinal Disease	primary Sjogren's syndrome	9.28E-03	IL4R,MATK,MICB,PRKCD,PSMB8,TAP2	6
Immunological Disease	primary Sjogren's syndrome	9.28E-03	IL4R,MATK,MICB,PRKCD,PSMB8,TAP2	6
Ophthalmic Disease	primary Sjogren's syndrome	9.28E-03	IL4R,MATK,MICB,PRKCD,PSMB8,TAP2	6
Cellular Growth and Proliferation	proliferation of lung cancer cell lines	9.34E-03	BAX,BIRC5,C1QBP,CDCA4,CDCA5,CDCP1,CHEK1,DUSP5,ERBB2,ERBB3,FOSL1,FOXM1,GLDC,GMNN,HMOX1,IGF2BP1,MYC,MYH14,NASP,PIM1,PLK1,PRKCD,ROR1,SLC3A2,TERT,TP53,WDR12	27
Cellular Development	proliferation of lung cancer cell lines	9.34E-03	BAX,BIRC5,C1QBP,CDCA4,CDCA5,CDCP1,CHEK1,DUSP5,ERBB2,ERBB3,FOSL1,FOXM1,GLDC,GMNN,HMOX1,IGF2BP1,MYC,MYH14,NASP,PIM1,PLK1,PRKCD,ROR1,SLC3A2,TERT,TP53,WDR12	27
Nucleic Acid Metabolism	metabolism of purine nucleotide	9.53E-03	ACTC1,AK4,AMPD3,BLM,DNA2,KIF20B,MSH2,MSH6,NUDT1,TNNT2	10
Small Molecule Biochemistry	metabolism of purine nucleotide	9.53E-03	ACTC1,AK4,AMPD3,BLM,DNA2,KIF20B,MSH2,MSH6,NUDT1,TNNT2	10
Cell Death and Survival	cell death of bone cancer cell lines	9.83E-03	BAX,BIRC5,CABLES1,CDH1,CHEK1,CHEK2,DPP4,HMGA1,MYC,NCL,PLK1,PMAIP1,PRDX1,PRKCD,PTTG1,PYCARD,RAD51,TNFRSF10A,TP53	19
Cellular Assembly and Organization	organization of cytoskeleton	1.00E-02	ACAP1,ADM,APOE,ARHGAP4,ARHGAP8/PRR5-ARHGAP8,ARL2,BIRC5,BST2,C1QBP,CCNB1,CD2AP,CDH1,CHEK1,DIAPH1,DIAPH2,DIAPH3,DLGAP5,DSP,ERBB2,EZR,F2RL1,FLT4,FOXM1,HTR1A,IQGAP1,ITGA6,KIF11,KIF18B,KIF20B,KIFC1,LIG1,LRRC16A,MAD2L2,MAP7,NANOG,PDGFA,PFN1,PLAU,PLEKHG6,RAB17,RAN,RCC1,ROR1,SDC4,SLC3A2,SLC9A3R1,SPC25,TACC3,TERF1,TESK2,TP53,TTK,VIL1	53
Cellular Function and Maintenance	organization of cytoskeleton	1.00E-02	ACAP1,ADM,APOE,ARHGAP4,ARHGAP8/PRR5-ARHGAP8,ARL2,BIRC5,BST2,C1QBP,CCNB1,CD2AP,CDH1,CHEK1,DIAPH1,DIAPH2,DIAPH3,DLGAP5,DSP,ERBB2,EZR,F2RL1,FLT4,FOXM1,HTR1A,IQGAP1,ITGA6,KIF11,KIF18B,KIF20B,KIFC1,LIG1,LRRC16A,MAD2L2,MAP7,NANOG,PDGFA,PFN1,PLAU,PLEKHG6,RAB17,RAN,RCC1,ROR1,SDC4,SLC3A2,SLC9A3R1,SPC25,TACC3,TERF1,TESK2,TP53,TTK,VIL1	53
Nucleic Acid Metabolism	catabolism of purine nucleotide	1.01E-02	ACTC1,AMPD3,BLM,DNA2,KIF20B,MSH2,MSH6,NUDT1,TNNT2	9
Small Molecule Biochemistry	catabolism of purine nucleotide	1.01E-02	ACTC1,AMPD3,BLM,DNA2,KIF20B,MSH2,MSH6,NUDT1,TNNT2	9
Organismal Development	growth of organism	1.01E-02	CSE1L,FGFR4,IDO1,LIG1,MID1IP1,MT1G,ST6GAL1,TMPRSS2,ZC3HAV1	9
Cancer	myosarcoma	1.01E-02	CKS2,DIAPH3,FGFR4,FOXM1,FOXO1,GLI1,HMGA1,TP53,TUBA4A	9
Skeletal and Muscular Disorders	myosarcoma	1.01E-02	CKS2,DIAPH3,FGFR4,FOXM1,FOXO1,GLI1,HMGA1,TP53,TUBA4A	9
Cancer	epidermal hyperplasia	1.03E-02	C1QBP,LAD1,MALL,PHB,RANBP1,SRM,UPP1	7
Dermatological Diseases and Conditions	epidermal hyperplasia	1.03E-02	C1QBP,LAD1,MALL,PHB,RANBP1,SRM,UPP1	7
Cancer	diffuse large B-cell lymphoma	1.04E-02	CARD11,KDM2B,MYC,PIM1,PIM2,SOCS1,TNFSF11,TP53	8
Hematological Disease	diffuse large B-cell lymphoma	1.04E-02	CARD11,KDM2B,MYC,PIM1,PIM2,SOCS1,TNFSF11,TP53	8
Infectious Disease	replication of vesicular stomatitis virus	1.04E-02	APOBEC3C,BAX,IKBKE,PARP12,SOCS1,TAP1,TP53,TRIM25	8
Cell Death and Survival	cell death of lymphatic system cells	1.09E-02	CD40,FANCA,FLT4,SLC29A2,TP53	5
Cell Death and Survival	cell death of kidney cancer cell lines	1.11E-02	BIRC5,HMOX1,PAWR,PRODH,SFRP1,TP53	6
Hematological Disease	erythrocytosis	1.11E-02	CDC25A,PTPN6,RRM2,RRM2B,SH2B3,SRSF2	6
Organismal Injury and Abnormalities	erythrocytosis	1.11E-02	CDC25A,PTPN6,RRM2,RRM2B,SH2B3,SRSF2	6
Cellular Movement	migration of ovarian cancer cell lines	1.11E-02	CDCP1,CLDN7,DPP4,HAS3,IQGAP1,TP53	6
Organismal Injury and Abnormalities	nodule	1.11E-02	FLT4,GSTP1,HSP90AB1,MT-ND1,MT-ND2,PRDX6	6
Cell Cycle	arrest in G2 phase of carcinoma cell lines	1.16E-02	CCNB1,CHEK1,CHEK2,TP53	4
Cellular Growth and Proliferation	generation of female germ cells	1.16E-02	DIAPH2,DMC1,M1AP,USP9X	4
Cellular Development	generation of female germ cells	1.16E-02	DIAPH2,DMC1,M1AP,USP9X	4
Tissue Development	generation of female germ cells	1.16E-02	DIAPH2,DMC1,M1AP,USP9X	4
Organismal Development	generation of female germ cells	1.16E-02	DIAPH2,DMC1,M1AP,USP9X	4
Embryonic Development	generation of female germ cells	1.16E-02	DIAPH2,DMC1,M1AP,USP9X	4
Organ Development	generation of female germ cells	1.16E-02	DIAPH2,DMC1,M1AP,USP9X	4
Reproductive System Development and Function	generation of female germ cells	1.16E-02	DIAPH2,DMC1,M1AP,USP9X	4
Cell Morphology	homologous recombination repair of tumor cell lines	1.16E-02	BRCA2,CHEK1,RAD51,TP53	4
Cellular Function and Maintenance	homologous recombination repair of tumor cell lines	1.16E-02	BRCA2,CHEK1,RAD51,TP53	4
Cell Cycle	re-entry into interphase of tumor cell lines	1.16E-02	CCNE1,CDC25A,CDC25C,MYC	4
Post-Translational Modification	phosphorylation of L-tyrosine	1.18E-02	CD74,EPHA1,FLT1,FLT4,LYN,PTPN6,TDGF1,TEK,THBS4,TP53	10
Amino Acid Metabolism	phosphorylation of L-tyrosine	1.18E-02	CD74,EPHA1,FLT1,FLT4,LYN,PTPN6,TDGF1,TEK,THBS4,TP53	10
Small Molecule Biochemistry	phosphorylation of L-tyrosine	1.18E-02	CD74,EPHA1,FLT1,FLT4,LYN,PTPN6,TDGF1,TEK,THBS4,TP53	10
Cancer	urothelial neoplasm	1.19E-02	FOXO1,GSTP1,POLE,POLE2,RRM2,SFRP1,TP53,TUBA4A	8
Renal and Urological Disease	urothelial neoplasm	1.19E-02	FOXO1,GSTP1,POLE,POLE2,RRM2,SFRP1,TP53,TUBA4A	8
Cancer	serous adenocarcinoma	1.24E-02	ACP5,ADCY2,APOE,CLDN3,CLDN7,CTNNAL1,DPP4,EPCAM,GART,GINS1,GPX3,HPS3,KCNK6,MTFR2,OCLN,PPAP2A,SMC4,SPINT2,TP53,WFDC2	20
Cancer	pancreatic cancer	1.25E-02	APOC1,BIRC5,BRCA2,CD74,CDH1,CDH3,CYBA,ENO1,ERBB2,FLT1,FLT4,GLI1,GSTP1,HLA-DRA,IDO1,KIAA0101,KRT19,KRT7,MRPL37,PABPC3,PLAU,POLE,POLE2,PRKCD,RAD54L,RRM2,RRM2B,TNFRSF10A,TP53,XRCC2	30
Gastrointestinal Disease	pancreatic cancer	1.25E-02	APOC1,BIRC5,BRCA2,CD74,CDH1,CDH3,CYBA,ENO1,ERBB2,FLT1,FLT4,GLI1,GSTP1,HLA-DRA,IDO1,KIAA0101,KRT19,KRT7,MRPL37,PABPC3,PLAU,POLE,POLE2,PRKCD,RAD54L,RRM2,RRM2B,TNFRSF10A,TP53,XRCC2	30
Endocrine System Disorders	pancreatic cancer	1.25E-02	APOC1,BIRC5,BRCA2,CD74,CDH1,CDH3,CYBA,ENO1,ERBB2,FLT1,FLT4,GLI1,GSTP1,HLA-DRA,IDO1,KIAA0101,KRT19,KRT7,MRPL37,PABPC3,PLAU,POLE,POLE2,PRKCD,RAD54L,RRM2,RRM2B,TNFRSF10A,TP53,XRCC2	30
Molecular Transport	quantity of reactive oxygen species	1.27E-02	BAX,GGT1,HMGA1,HSPA4,MYC,PRDX1,PRDX6,TERT,TP53	9
Free Radical Scavenging	quantity of reactive oxygen species	1.27E-02	BAX,GGT1,HMGA1,HSPA4,MYC,PRDX1,PRDX6,TERT,TP53	9
Cell Cycle	DNA damage checkpoint of cells	1.28E-02	CHEK1,GMNN	2
DNA Replication, Recombination, and Repair	DNA damage checkpoint of cells	1.28E-02	CHEK1,GMNN	2
Cancer	HER2-positive breast cancer	1.28E-02	CDH1,ERBB2	2
Hematological Disease	Hyper-IgM syndrome type 2	1.28E-02	CD40,UNG	2
Immunological Disease	Hyper-IgM syndrome type 2	1.28E-02	CD40,UNG	2
Hereditary Disorder	Hyper-IgM syndrome type 2	1.28E-02	CD40,UNG	2
Tissue Development	accumulation of carcinoma cell lines	1.28E-02	HMOX1,TP53	2
Gene Expression	activation of kinetochores	1.28E-02	NCAPG2,SMC2	2
Cell-To-Cell Signaling and Interaction	antibody-dependent cell-mediated cytotoxicity of breast cancer cell lines	1.28E-02	ERBB2,ERBB3	2
Inflammatory Response	antibody-dependent cell-mediated cytotoxicity of breast cancer cell lines	1.28E-02	ERBB2,ERBB3	2
Cell Cycle	arrest in G1 phase of squamous cell carcinoma cell lines	1.28E-02	CDCA2,ERBB2	2
Cell Cycle	arrest in G2/M phase transition of brain cancer cell lines	1.28E-02	PLAU,TP53	2
Cancer	atypical adenomatous lung hyperplasia	1.28E-02	BIRC5,CDH1	2
Immunological Disease	bare lymphocyte syndrome, type i	1.28E-02	TAP1,TAP2	2
Developmental Disorder	bare lymphocyte syndrome, type i	1.28E-02	TAP1,TAP2	2
Hereditary Disorder	bare lymphocyte syndrome, type i	1.28E-02	TAP1,TAP2	2
Amino Acid Metabolism	catabolism of L-serine	1.28E-02	CBS,SHMT1	2
Small Molecule Biochemistry	catabolism of L-serine	1.28E-02	CBS,SHMT1	2
Cell Death and Survival	cell death of multiple myeloma cells	1.28E-02	CD40,CHEK1	2
Tumor Morphology	cell death of multiple myeloma cells	1.28E-02	CD40,CHEK1	2
Cell Death and Survival	cell viability of B-lymphocyte derived cell lines	1.28E-02	BLM,MYBL2	2
Hematological System Development and Function	cell viability of B-lymphocyte derived cell lines	1.28E-02	BLM,MYBL2	2
Tissue Development	cell-cell contact of keratinocytes	1.28E-02	CDH1,CDH3	2
Cell-To-Cell Signaling and Interaction	cell-cell contact of keratinocytes	1.28E-02	CDH1,CDH3	2
Hair and Skin Development and Function	cell-cell contact of keratinocytes	1.28E-02	CDH1,CDH3	2
Cell Cycle	checkpoint control of fibroblast cell lines	1.28E-02	EXO1,FANCD2	2
DNA Replication, Recombination, and Repair	checkpoint control of fibroblast cell lines	1.28E-02	EXO1,FANCD2	2
Connective Tissue Development and Function	checkpoint control of fibroblast cell lines	1.28E-02	EXO1,FANCD2	2
Cell Cycle	checkpoint control of lymphoblastoid cell lines	1.28E-02	CHEK1,TERF1	2
DNA Replication, Recombination, and Repair	checkpoint control of lymphoblastoid cell lines	1.28E-02	CHEK1,TERF1	2
Cell Death and Survival	clearance of cells	1.28E-02	FABP5,TP53	2
Cellular Function and Maintenance	clearance of cells	1.28E-02	FABP5,TP53	2
Free Radical Scavenging	concentration of reactive oxygen species	1.28E-02	HMOX1,TP53	2
Cancer	cystadenoma	1.28E-02	EIF4EBP1,RPS6KA1	2
Gastrointestinal Disease	ectodermal dysplasia with hair-tooth defects	1.28E-02	EDARADD,GJA1	2
Connective Tissue Disorders	ectodermal dysplasia with hair-tooth defects	1.28E-02	EDARADD,GJA1	2
Dental Disease	ectodermal dysplasia with hair-tooth defects	1.28E-02	EDARADD,GJA1	2
Developmental Disorder	ectodermal dysplasia with hair-tooth defects	1.28E-02	EDARADD,GJA1	2
Organismal Injury and Abnormalities	ectodermal dysplasia with hair-tooth defects	1.28E-02	EDARADD,GJA1	2
Skeletal and Muscular Disorders	ectodermal dysplasia with hair-tooth defects	1.28E-02	EDARADD,GJA1	2
Dermatological Diseases and Conditions	ectodermal dysplasia with hair-tooth defects	1.28E-02	EDARADD,GJA1	2
Hereditary Disorder	ectodermal dysplasia with hair-tooth defects	1.28E-02	EDARADD,GJA1	2
Skeletal and Muscular System Development and Function	force generation	1.28E-02	PDLIM1,TNNT2	2
Cellular Assembly and Organization	formation of cleavage furrow	1.28E-02	ANLN,PLK1	2
DNA Replication, Recombination, and Repair	formation of nuclear pores	1.28E-02	NUP107,TMEM48	2
Cellular Assembly and Organization	formation of nuclear pores	1.28E-02	NUP107,TMEM48	2
Cancer	growth of melanoma	1.28E-02	BIRC5,CD40	2
Cell Cycle	homologous recombination of plasmid DNA	1.28E-02	BLM,RAD51	2
DNA Replication, Recombination, and Repair	homologous recombination of plasmid DNA	1.28E-02	BLM,RAD51	2
Infectious Disease	infection by hepatitis B virus	1.28E-02	POLA1,POLD1	2
Cellular Movement	invasion of lung cell lines	1.28E-02	CDH1,FOSL1	2
Cell Cycle	meiosis of male germ cells	1.28E-02	HSPA2,PIM2	2
Reproductive System Development and Function	meiosis of male germ cells	1.28E-02	HSPA2,PIM2	2
Developmental Disorder	metaplasia	1.28E-02	BIRC5,TP53	2
Cancer	metastasis of medulloblastoma	1.28E-02	CDCA7L,ERBB2	2
Neurological Disease	metastasis of medulloblastoma	1.28E-02	CDCA7L,ERBB2	2
Cell Cycle	mitotic exit of cervical cancer cell lines	1.28E-02	CDC20,WEE1	2
Cell Cycle	morphology of chromosomes	1.28E-02	NCAPG2,SMC2	2
DNA Replication, Recombination, and Repair	morphology of chromosomes	1.28E-02	NCAPG2,SMC2	2
Cardiovascular Disease	paroxysmal atrial flutter	1.28E-02	SCN4A,SCN5A	2
Gastrointestinal Disease	periodontitis	1.28E-02	CTSC,FERMT1	2
Connective Tissue Disorders	periodontitis	1.28E-02	CTSC,FERMT1	2
Skeletal and Muscular Disorders	periodontitis	1.28E-02	CTSC,FERMT1	2
Inflammatory Disease	periodontitis	1.28E-02	CTSC,FERMT1	2
Cell Cycle	ploidy of epithelial cells	1.28E-02	AURKA,TERT	2
Cellular Assembly and Organization	quantity of fibrils	1.28E-02	APOE,TP53	2
Tissue Morphology	quantity of myeloma cell lines	1.28E-02	CD40,TP53	2
Small Molecule Biochemistry	secretion of peptide	1.28E-02	CD74,PNP	2
Molecular Transport	secretion of peptide	1.28E-02	CD74,PNP	2
Cellular Assembly and Organization	stabilization of intermediate filaments	1.28E-02	DSP,KRT8	2
Cellular Assembly and Organization	structure of kinetochores	1.28E-02	NCAPG2,SMC2	2
Cancer	survival of chronic lymphocytic leukemia B cells	1.28E-02	CD74,GLI1	2
Cell Death and Survival	survival of chronic lymphocytic leukemia B cells	1.28E-02	CD74,GLI1	2
Tumor Morphology	survival of chronic lymphocytic leukemia B cells	1.28E-02	CD74,GLI1	2
Cardiovascular Disease	susceptibility to severe coronary artery disease	1.28E-02	APOE,PLAU	2
Nucleic Acid Metabolism	synthesis of AMP	1.28E-02	ADSL,ADSS	2
Small Molecule Biochemistry	synthesis of AMP	1.28E-02	ADSL,ADSS	2
Cell Morphology	transepithelial electrical resistance of bronchial epithelial cells	1.28E-02	CDH1,LPAR3	2
Hair and Skin Development and Function	transepithelial electrical resistance of bronchial epithelial cells	1.28E-02	CDH1,LPAR3	2
Cancer	transformation of B-lymphocyte derived cell lines	1.28E-02	HMGA1,HMGA2	2
Molecular Transport	transport of gemcitabine	1.28E-02	SLC29A1,SLC29A2	2
Drug Metabolism	transport of gemcitabine	1.28E-02	SLC29A1,SLC29A2	2
Cancer	trisomy 8 myelodysplastic syndrome	1.28E-02	BIRC5,MYC	2
Hematological Disease	trisomy 8 myelodysplastic syndrome	1.28E-02	BIRC5,MYC	2
Developmental Disorder	trisomy 8 myelodysplastic syndrome	1.28E-02	BIRC5,MYC	2
Hereditary Disorder	trisomy 8 myelodysplastic syndrome	1.28E-02	BIRC5,MYC	2
Cancer	tumorigenesis of endothelial cell lines	1.28E-02	IKBKE,TERT	2
Cardiovascular Disease	tumorigenesis of endothelial cell lines	1.28E-02	IKBKE,TERT	2
Cell Death and Survival	cell death of breast cancer cell lines	1.28E-02	ADM,BAX,BIRC5,CDH1,CHEK1,CSE1L,CYB5A,CYCS,ERBB2,GRHL2,HSPD1,IKBKE,MELK,MSH2,MST4,NANOG,PARP1,PHB,PLK1,PMAIP1,POU5F1,PRDM14,PRDM5,PSIP1,PTPN6,PTTG1,SFRP1,SLC29A1,TERT,TFRC,TNFRSF10A,TP53,TRAIP	33
Cancer	carcinoma in ovary	1.28E-02	ACP5,APOE,CLDN3,CLDN7,CTNNAL1,DPP4,EPCAM,GINS1,GPX3,HPS3,KCNK6,MTFR2,OCLN,PPAP2A,SMC4,SPINT2,TP53,WFDC2	18
Cell Cycle	G1/S phase transition of lung cancer cell lines	1.29E-02	ERBB2,MYC,TP53	3
DNA Replication, Recombination, and Repair	aberration of chromosomes	1.29E-02	BRCA2,CCNB1,HMGA2	3
Cell Cycle	arrest in G2 phase of brain cancer cell lines	1.29E-02	PLAU,TP53,TRAF2	3
Cell Cycle	arrest in interphase of fibroblast cell lines	1.29E-02	CCNE1,ERBB2,TP53	3
Cellular Assembly and Organization	attachment of spindle fibers	1.29E-02	AURKB,BUB1B,SGOL1	3
Cell Cycle	cell cycle progression of squamous cell carcinoma cell lines	1.29E-02	AURKA,EPCAM,TP53	3
DNA Replication, Recombination, and Repair	formation of nucleosomes	1.29E-02	CHAF1A,CHAF1B,NPM1	3
Cellular Assembly and Organization	formation of nucleosomes	1.29E-02	CHAF1A,CHAF1B,NPM1	3
Cell Cycle	interphase of endothelial cell lines	1.29E-02	CDH1,FOXM1,MYC	3
Cell Cycle	mitosis of epithelial cell lines	1.29E-02	AURKB,CDC25A,PTTG1	3
Hair and Skin Development and Function	mitosis of epithelial cell lines	1.29E-02	AURKB,CDC25A,PTTG1	3
Cell Death and Survival	mitotic catastrophe	1.29E-02	BUB1B,CHEK2,FOXM1	3
DNA Replication, Recombination, and Repair	mutation of DNA	1.29E-02	BLM,DDB2,TP53	3
Cell Cycle	replication of tumor cell lines	1.29E-02	CCNE1,CDC6,KIF14	3
Cell Cycle	senescence of lung cancer cell lines	1.29E-02	EIF4EBP1,SRSF2,TP53	3
Nucleic Acid Metabolism	synthesis of nucleoside 5'-phosphate	1.29E-02	ADSL,ADSS,UMPS	3
Small Molecule Biochemistry	synthesis of nucleoside 5'-phosphate	1.29E-02	ADSL,ADSS,UMPS	3
Nucleic Acid Metabolism	synthesis of ribonucleoside monophosphate	1.29E-02	ADSL,ADSS,UMPS	3
Small Molecule Biochemistry	synthesis of ribonucleoside monophosphate	1.29E-02	ADSL,ADSS,UMPS	3
Cell-To-Cell Signaling and Interaction	immune response of tumor cell lines	1.30E-02	EIF4EBP1,ERBB2,ERBB3,F2RL1,LCK,MSH2,POLA1,RRAS2,SCN5A,TP53	10
Inflammatory Response	immune response of tumor cell lines	1.30E-02	EIF4EBP1,ERBB2,ERBB3,F2RL1,LCK,MSH2,POLA1,RRAS2,SCN5A,TP53	10
Cell Cycle	arrest in G2/M phase transition of tumor cell lines	1.31E-02	CCNA2,CCNB1,DPP4,PLAU,RRM2B,TP53	6
Cell Death and Survival	colony survival of cells	1.31E-02	BRIP1,CHEK1,CHEK2,MSH2,PARP1,TP53	6
Cellular Function and Maintenance	colony survival of cells	1.31E-02	BRIP1,CHEK1,CHEK2,MSH2,PARP1,TP53	6
Cancer	cytotoxic reaction of tumor cell lines	1.31E-02	EIF4EBP1,ERBB2,LCK,MSH2,POLA1,TP53	6
Cell-To-Cell Signaling and Interaction	cytotoxic reaction of tumor cell lines	1.31E-02	EIF4EBP1,ERBB2,LCK,MSH2,POLA1,TP53	6
Inflammatory Response	cytotoxic reaction of tumor cell lines	1.31E-02	EIF4EBP1,ERBB2,LCK,MSH2,POLA1,TP53	6
Cancer	gastric adenocarcinoma	1.31E-02	CDH1,ERBB2,HMGA2,MSH6,PARP1,TP53	6
Gastrointestinal Disease	gastric adenocarcinoma	1.31E-02	CDH1,ERBB2,HMGA2,MSH6,PARP1,TP53	6
Cell Death and Survival	apoptosis of prostate cancer cell lines	1.31E-02	ABCE1,BAX,BIRC5,COX5A,FOXO1,FST,HPN,HSPD1,MYC,ORAI1,PARP1,PAWR,PIM1,PLAU,PMAIP1,PRKCD,TNFRSF10A,TNFSF11,TP53,TRAF2	20
Cellular Growth and Proliferation	proliferation of prostate cancer cell lines	1.32E-02	ADM,BIRC5,BRCA2,CD4,CDH1,ERBB2,FABP5,FEN1,FKBP5,FOXO1,FST,GLI1,HAS3,HMGA2,HMOX1,HPN,IQGAP2,MST4,MYC,PARP1,PHB,PIM1,PRKCD,SOCS1,STEAP3,TERT,TP53	27
Cellular Development	proliferation of prostate cancer cell lines	1.32E-02	ADM,BIRC5,BRCA2,CD4,CDH1,ERBB2,FABP5,FEN1,FKBP5,FOXO1,FST,GLI1,HAS3,HMGA2,HMOX1,HPN,IQGAP2,MST4,MYC,PARP1,PHB,PIM1,PRKCD,SOCS1,STEAP3,TERT,TP53	27
Nucleic Acid Metabolism	metabolism of nucleotide	1.32E-02	ACTC1,ADCY2,ADM,ADSL,ADSS,AK4,AMPD3,APOE,BLM,CCNB1,DNA2,ENPP1,GAL,HMOX1,HPRT1,HSPD1,HTR1A,KIF20B,MSH2,MSH6,NPR1,NUDT1,PPAT,REXO2,SLC25A13,TNNT2,TP53,UMPS	28
Small Molecule Biochemistry	metabolism of nucleotide	1.32E-02	ACTC1,ADCY2,ADM,ADSL,ADSS,AK4,AMPD3,APOE,BLM,CCNB1,DNA2,ENPP1,GAL,HMOX1,HPRT1,HSPD1,HTR1A,KIF20B,MSH2,MSH6,NPR1,NUDT1,PPAT,REXO2,SLC25A13,TNNT2,TP53,UMPS	28
Cell Cycle	cell cycle progression of carcinoma cell lines	1.34E-02	AURKA,HMOX1,PRKCD,TERT,TP53	5
Developmental Disorder	congenital disorder of glycosylation type 1	1.34E-02	ALG1,ALG3,ALG6,ALG8,SRD5A3	5
Hereditary Disorder	congenital disorder of glycosylation type 1	1.34E-02	ALG1,ALG3,ALG6,ALG8,SRD5A3	5
Metabolic Disease	congenital disorder of glycosylation type 1	1.34E-02	ALG1,ALG3,ALG6,ALG8,SRD5A3	5
Neurological Disease	late-onset Alzheimer's disease	1.34E-02	APOE,CD2AP,EPHA1,LRAT,PLAU	5
Psychological Disorders	late-onset Alzheimer's disease	1.34E-02	APOE,CD2AP,EPHA1,LRAT,PLAU	5
Cancer	leiomyosarcoma	1.34E-02	CKS2,DIAPH3,FOXM1,HMGA1,TP53	5
Skeletal and Muscular Disorders	leiomyosarcoma	1.34E-02	CKS2,DIAPH3,FOXM1,HMGA1,TP53	5
Cell Death and Survival	cell viability of prostate cancer cell lines	1.34E-02	ANLN,BIRC5,GSTP1,LCK,PIM1,PLAU,PRKCD,TP53	8
Cell Morphology	repair of cells	1.34E-02	BLM,BRCA2,CHEK1,NPM1,PARP1,RAD51,TP53,XRCC5	8
Cellular Function and Maintenance	repair of cells	1.34E-02	BLM,BRCA2,CHEK1,NPM1,PARP1,RAD51,TP53,XRCC5	8
Cellular Growth and Proliferation	proliferation of tumor cells	1.35E-02	CCNE1,CD40,CHEK1,CNKSR1,EIF4EBP1,ERBB2,EZR,FOXM1,FST,GLDC,HMGA2,HPN,ICMT,LIN28B,MYC,PARP1,PLK1,PRKCD,SFRP1,SLC3A2,TP53	21
Cellular Development	proliferation of tumor cells	1.35E-02	CCNE1,CD40,CHEK1,CNKSR1,EIF4EBP1,ERBB2,EZR,FOXM1,FST,GLDC,HMGA2,HPN,ICMT,LIN28B,MYC,PARP1,PLK1,PRKCD,SFRP1,SLC3A2,TP53	21
Tumor Morphology	proliferation of tumor cells	1.35E-02	CCNE1,CD40,CHEK1,CNKSR1,EIF4EBP1,ERBB2,EZR,FOXM1,FST,GLDC,HMGA2,HPN,ICMT,LIN28B,MYC,PARP1,PLK1,PRKCD,SFRP1,SLC3A2,TP53	21
Cell Cycle	G1 phase of breast cancer cell lines	1.37E-02	CCNE1,CCNG1,CDC25A,ERBB2,ERBB3,MYC,TP53	7
Cellular Development	gametogenesis	1.44E-02	CDYL,DAZL,DIAPH2,DMC1,GPR64,M1AP,NR6A1,PTTG1,USP9X,WFDC2	10
Tissue Development	gametogenesis	1.44E-02	CDYL,DAZL,DIAPH2,DMC1,GPR64,M1AP,NR6A1,PTTG1,USP9X,WFDC2	10
Organismal Development	gametogenesis	1.44E-02	CDYL,DAZL,DIAPH2,DMC1,GPR64,M1AP,NR6A1,PTTG1,USP9X,WFDC2	10
Embryonic Development	gametogenesis	1.44E-02	CDYL,DAZL,DIAPH2,DMC1,GPR64,M1AP,NR6A1,PTTG1,USP9X,WFDC2	10
Organ Development	gametogenesis	1.44E-02	CDYL,DAZL,DIAPH2,DMC1,GPR64,M1AP,NR6A1,PTTG1,USP9X,WFDC2	10
Reproductive System Development and Function	gametogenesis	1.44E-02	CDYL,DAZL,DIAPH2,DMC1,GPR64,M1AP,NR6A1,PTTG1,USP9X,WFDC2	10
Post-Translational Modification	autophosphorylation of protein	1.45E-02	AURKA,AURKB,CHEK2,EPHA1,ERBB2,FLT1,FLT4,LYN,MELK,PIM1,TEK,TYRO3,VRK2	13
Cancer	hepatocellular carcinoma	1.45E-02	ACY1,ALPL,ANLN,ARL2,ASF1B,AURKA,BIRC5,BRCA2,CCNB1,CENPH,CKS1B,CKS2,CSE1L,E2F8,EPCAM,ERBB2,ERBB3,FAM83D,FLT1,FLT4,GLI1,HSP90AB1,HTATIP2,MLF1IP,ORC6,PFN1,PLAU,PLK1,POLE,POLE2,RPL13A,RPL9,RRM2,SOCS1,TEK,TP53	36
Gastrointestinal Disease	hepatocellular carcinoma	1.45E-02	ACY1,ALPL,ANLN,ARL2,ASF1B,AURKA,BIRC5,BRCA2,CCNB1,CENPH,CKS1B,CKS2,CSE1L,E2F8,EPCAM,ERBB2,ERBB3,FAM83D,FLT1,FLT4,GLI1,HSP90AB1,HTATIP2,MLF1IP,ORC6,PFN1,PLAU,PLK1,POLE,POLE2,RPL13A,RPL9,RRM2,SOCS1,TEK,TP53	36
Hepatic System Disease	hepatocellular carcinoma	1.45E-02	ACY1,ALPL,ANLN,ARL2,ASF1B,AURKA,BIRC5,BRCA2,CCNB1,CENPH,CKS1B,CKS2,CSE1L,E2F8,EPCAM,ERBB2,ERBB3,FAM83D,FLT1,FLT4,GLI1,HSP90AB1,HTATIP2,MLF1IP,ORC6,PFN1,PLAU,PLK1,POLE,POLE2,RPL13A,RPL9,RRM2,SOCS1,TEK,TP53	36
Cancer	hyperplasia	1.47E-02	APOE,ARHGEF5,BIRC5,BRCA2,BRIP1,C1QBP,CDH1,CLDN3,CLDN7,EBPL,EPCAM,ERBB3,ESRP1,ETV4,GLI1,GPX3,GRM4,HMGA2,HMGN5,HMOX1,ITPR3,KRT8,LAD1,M6PR,MALL,MAP7D3,METAP1,MSH6,MYH14,PHB,PHC1,PLAU,RANBP1,SALL4,SFRP1,SPINT2,SRM,TP53,TTK,UPP1,WFDC2	41
Energy Production	consumption of oxygen	1.49E-02	BAX,LDHA,SSBP1,TP53	4
Cell Cycle	delay in cell cycle progression of tumor cell lines	1.49E-02	AURKA,BAX,BIRC5,LIG1	4
Cell Cycle	interphase of fibroblast cell lines	1.49E-02	CCNE1,ERBB2,MYC,TP53	4
DNA Replication, Recombination, and Repair	mismatch repair	1.49E-02	EXO1,MSH2,MSH6,XRCC5	4
Cell Cycle	organization of chromosomes	1.49E-02	CENPH,HMGA2,MYC,SUV39H1	4
DNA Replication, Recombination, and Repair	organization of chromosomes	1.49E-02	CENPH,HMGA2,MYC,SUV39H1	4
Cellular Assembly and Organization	organization of chromosomes	1.49E-02	CENPH,HMGA2,MYC,SUV39H1	4
Cellular Function and Maintenance	organization of chromosomes	1.49E-02	CENPH,HMGA2,MYC,SUV39H1	4
Cell Death and Survival	apoptosis of colon cancer cell lines	1.51E-02	BAX,BIRC5,CCNB1,CHEK1,CHEK2,CSE1L,CYCS,DSG2,ERBB2,FLT1,GSTP1,HMGA1,HSPD1,IGF2BP1,MELK,MYC,PARP1,PRKCD,PYCARD,ST6GAL1,TERT,TNFRSF10A,TP53,TTK,XRCC5	25
Cellular Movement	invasion of carcinoma cell lines	1.51E-02	ARTN,AURKA,CDH1,CLDN7,DNMT3B,ERBB3,ETV4,FOSL1,HTATIP2,PRKCD,PTTG1,RPS6KA1	12
Cell Death and Survival	cell death of lymphoma cell lines	1.51E-02	A4GALT,BIRC5,CBR1,CD40,CD55,CHEK2,DUT,EZR,FOXO1,GGT1,IDO1,LYN,MYC,NCL,PMAIP1,PTPN6,ST6GAL1,TNFRSF8,TP53	19
Cellular Movement	invasion of pancreatic cancer cell lines	1.53E-02	ADM,CLDN4,FOXM1,HMGA1,PLAU,RRM2	6
Cell Death and Survival	cell death of prostate cancer cell lines	1.54E-02	ABCE1,BAX,BIRC5,CHEK1,COX5A,FOXO1,FST,HPN,HSPD1,ICMT,MYC,ORAI1,PARP1,PAWR,PIM1,PLAU,PMAIP1,PRKCD,TNFRSF10A,TNFSF11,TP53,TRAF2	22
Cellular Movement	cell movement of lung cancer cell lines	1.56E-02	C1QBP,CD9,ERBB3,ETV4,FOSL1,HTATIP2,IGF2BP1,PHB,PODXL,PRKCD,RPS6KA1	11
Cell Death and Survival	apoptosis of connective tissue cells	1.56E-02	ADM,BAX,BLM,FOXO1,MYBL2,MYC,SFRP1,STC1,TERT,TNFRSF10A,TNFSF11,TP53,TRAF2	13
Protein Synthesis	homo-oligomerization of protein	1.56E-02	BAX,EHD4,HMOX1,NACC1,RAD51,STOM,TERF1	7
Cell Morphology	repair of tumor cell lines	1.56E-02	BRCA2,CHEK1,NPM1,PARP1,RAD51,TP53,XRCC5	7
Cellular Function and Maintenance	repair of tumor cell lines	1.56E-02	BRCA2,CHEK1,NPM1,PARP1,RAD51,TP53,XRCC5	7
Cellular Growth and Proliferation	proliferation of lymphatic system cells	1.58E-02	AURKB,BIRC5,CCNB1,CD40,CDC25A,FANCA,FLT4,FOXM1,TP53	9
Lymphoid Tissue Structure and Development	proliferation of lymphatic system cells	1.58E-02	AURKB,BIRC5,CCNB1,CD40,CDC25A,FANCA,FLT4,FOXM1,TP53	9
tox Functions:
Category	Functions Annotation	p-Value	Molecules	# Molecules
Hepatocellular Carcinoma	biliary tract cancer	3.99E-05	ACY1,ALPL,BIRC5,BRCA2,EPCAM,ERBB2,ERBB3,HSP90AB1,PLAU,POLE,POLE2,RPL13A,RPL9,RRM2,TP53	15
Liver Hyperplasia/Hyperproliferation	biliary tract cancer	3.99E-05	ACY1,ALPL,BIRC5,BRCA2,EPCAM,ERBB2,ERBB3,HSP90AB1,PLAU,POLE,POLE2,RPL13A,RPL9,RRM2,TP53	15
Hepatocellular Carcinoma	bile duct cancer	1.11E-04	ACY1,ALPL,EPCAM,ERBB2,ERBB3,HSP90AB1,PLAU,POLE,POLE2,RPL13A,RPL9,RRM2,TP53	13
Liver Hyperplasia/Hyperproliferation	bile duct cancer	1.11E-04	ACY1,ALPL,EPCAM,ERBB2,ERBB3,HSP90AB1,PLAU,POLE,POLE2,RPL13A,RPL9,RRM2,TP53	13
Hepatocellular Carcinoma	gallbladder cancer	2.96E-04	BIRC5,ERBB2,ERBB3,POLE,POLE2,RRM2,TP53	7
Liver Hyperplasia/Hyperproliferation	gallbladder cancer	2.96E-04	BIRC5,ERBB2,ERBB3,POLE,POLE2,RRM2,TP53	7
Congenital Heart Anomaly	arrhythmogenic right ventricular dysplasia	3.01E-03	DSC2,DSG2,DSP,RPSA	4
Hepatocellular Carcinoma	cholangiocarcinoma	4.38E-03	ACY1,EPCAM,ERBB2,ERBB3,HSP90AB1,PLAU,RPL13A,RPL9	8
Liver Hyperplasia/Hyperproliferation	cholangiocarcinoma	4.38E-03	ACY1,EPCAM,ERBB2,ERBB3,HSP90AB1,PLAU,RPL13A,RPL9	8
Hepatocellular Carcinoma	extrahepatic bile duct cancer	5.11E-03	POLE,POLE2,RRM2	3
Liver Hyperplasia/Hyperproliferation	extrahepatic bile duct cancer	5.11E-03	POLE,POLE2,RRM2	3
Cardiac Arrythmia	paroxysmal atrial flutter	1.28E-02	SCN4A,SCN5A	2
Cardiac Arteriopathy	susceptibility to severe coronary artery disease	1.28E-02	APOE,PLAU	2
Hepatocellular Carcinoma	hepatocellular carcinoma	1.45E-02	ACY1,ALPL,ANLN,ARL2,ASF1B,AURKA,BIRC5,BRCA2,CCNB1,CENPH,CKS1B,CKS2,CSE1L,E2F8,EPCAM,ERBB2,ERBB3,FAM83D,FLT1,FLT4,GLI1,HSP90AB1,HTATIP2,MLF1IP,ORC6,PFN1,PLAU,PLK1,POLE,POLE2,RPL13A,RPL9,RRM2,SOCS1,TEK,TP53	36
Liver Hyperplasia/Hyperproliferation	hepatocellular carcinoma	1.45E-02	ACY1,ALPL,ANLN,ARL2,ASF1B,AURKA,BIRC5,BRCA2,CCNB1,CENPH,CKS1B,CKS2,CSE1L,E2F8,EPCAM,ERBB2,ERBB3,FAM83D,FLT1,FLT4,GLI1,HSP90AB1,HTATIP2,MLF1IP,ORC6,PFN1,PLAU,PLK1,POLE,POLE2,RPL13A,RPL9,RRM2,SOCS1,TEK,TP53	36
Liver Hyperplasia/Hyperproliferation	liver cancer	1.71E-02	ACY1,ALPL,ANLN,ARL2,ASF1B,AURKA,BIRC5,BRCA2,CCNB1,CENPH,CKS1B,CKS2,CLDN4,CSE1L,E2F8,EPCAM,ERBB2,ERBB3,ETV4,FAM83D,FLT1,FLT4,GLI1,HSP90AB1,HTATIP2,MLF1IP,NPM1,ORC6,PFN1,PHGDH,PLAU,PLK1,PLK4,POLE,POLE2,PRDX1,RAN,RPL13A,RPL9,RRM2,SFRP1,SOCS1,TEK,THY1,TP53,USP9X	46
Cardiac Arrythmia	paroxysmal atrial fibrillation	2.45E-02	SCN4A,SCN5A	2
Liver Damage	injury of liver	3.90E-02	HLA-A,HLA-DRA	2
Congenital Heart Anomaly	arrhythmogenic right ventricular dysplasia familial 10	6.68E-02	DSG2	1
Congenital Heart Anomaly	arrhythmogenic right ventricular dysplasia familial 11	6.68E-02	DSC2	1
Congenital Heart Anomaly	atrial septal defect type 5	6.68E-02	ACTC1	1
Congenital Heart Anomaly	familial arrhythmogenic right ventricular dysplasia type 8	6.68E-02	DSP	1
Cardiac Arrythmia	familial atrial fibrillation type 10	6.68E-02	SCN5A	1
Glomerular Injury	focal segmental glomerulosclerosis type 6	6.68E-02	MYO1E	1
Increased Levels of Creatinine	increased clearance of creatinine	6.68E-02	ADM	1
Increased Levels of Albumin	increased export of albumin	6.68E-02	RAN	1
Increased Levels of ALT	increased localization of ALT	6.68E-02	APOE	1
Increased Levels of AST	increased localization of AST	6.68E-02	APOE	1
Liver Cirrhosis	indian childhood cirrhosis	6.68E-02	CIRH1A	1
Renal Damage	injury of renal glomerulus	6.68E-02	ADM	1
Glomerular Injury	lipoprotein glomerulopathy	6.68E-02	APOE	1
Nephrosis	nephronophthisis type 9	6.68E-02	NEK8	1
Cardiac Arrythmia	susceptibility to acquired long QT syndrome type 3	6.68E-02	SCN5A	1
Renal Inflammation	tubulointerstitial nephritis with uveitis	6.68E-02	DSP	1
Renal Nephritis	tubulointerstitial nephritis with uveitis	6.68E-02	DSP	1
Glomerular Injury	focal segmental glomerulosclerosis	8.69E-02	CD2AP,MYO1E,PDLIM1	3
Liver Proliferation	arrest in growth of hepatocytes	1.29E-01	CCNE1	1
Cardiac Arrythmia	autosomal recessive sick sinus syndrome	1.29E-01	SCN5A	1
Liver Cirrhosis	cryptogenic cirrhosis	1.29E-01	KRT8	1
Renal Inflammation	diffuse proliferative lupus nephritis	1.29E-01	PDLIM1	1
Renal Nephritis	diffuse proliferative lupus nephritis	1.29E-01	PDLIM1	1
Cardiac Arrythmia	digenic long QT syndrome 2/3	1.29E-01	SCN5A	1
Cardiac Arrythmia	digenic long QT syndrome 3/6	1.29E-01	SCN5A	1
Congenital Heart Anomaly	familial arrhythmogenic right ventricular dysplasia type 5	1.29E-01	RPSA	1
Cardiac Arrythmia	paroxysmal familial ventricular fibrillation	1.29E-01	SCN5A	1
Heart Failure	sudden cardiac death	1.29E-01	SCN5A	1
Liver Cirrhosis	susceptibility to noncryptogenic cirrhosis	1.29E-01	KRT8	1
Renal Transformation	transformation of kidney cells	1.29E-01	TERT	1
Liver Fibrosis	fibrosis of liver	1.79E-01	GSTP1,POLA1,POLD1	3
Cardiac Stenosis	Williams-Beuren syndrome	1.87E-01	MLXIPL	1
Liver Hyperplasia/Hyperproliferation	hepatoblastoma	1.87E-01	TP53	1
Cardiac Arrythmia	idiopathic ventricular fibrillation	1.87E-01	SCN5A	1
Liver Hyperplasia/Hyperproliferation	liver metastases	1.87E-01	PLAU	1
Renal Proliferation	proliferation of kidney cell lines	1.92E-01	AURKA,BIRC5,DLGAP5,FGF19,FGFR4,HSPD1,IQGAP2,MST4,NANOG,PLK1,SALL4	11
Renal Necrosis/Cell Death	apoptosis of kidney cell lines	2.00E-01	BAX,BIRC5,CYCS,FGF19,FGFR4,FOXO1,HYOU1,LYN,MST4,PAWR,PMAIP1,PSIP1,PYCARD,TFRC,TJP2,TMX1,TNFRSF10A	17
Congenital Heart Anomaly	congenital heart disease	2.33E-01	ACTC1,DSC2,DSG2,DSP,GJA1,RPSA	6
Cardiac Hypertrophy	hypertrophy of cardiomyocytes	2.42E-01	TERT	1
Liver Cholestasis	cholestasis	2.65E-01	GGT1,MGST1,PAH,SLC25A13,SLCO1A2,TAP2,UGP2	7
Cardiac Necrosis/Cell Death	apoptosis of cardiomyocytes	2.65E-01	ADM,TERT	2
Congenital Heart Anomaly	endocardial cushion defect	2.92E-01	GJA1	1
Liver Necrosis/Cell Death	apoptosis of hepatocytes	3.16E-01	CD40,TP53	2
Renal Inflammation	membranous glomerulonephritis	3.40E-01	PDLIM1	1
Renal Nephritis	membranous glomerulonephritis	3.40E-01	PDLIM1	1
Liver Cholestasis	progressive familial intrahepatic cholestasis type 1	3.60E-01	MGST1,PAH,SLC25A13,TAP2,UGP2	5
Renal Necrosis/Cell Death	cell death of kidney cell lines	3.74E-01	BAX,BIRC5,CYCS,FGF19,FGFR4,FOXO1,GSTP1,HYOU1,LDHA,LYN,MST4,PAWR,PMAIP1,PSIP1,PYCARD,RAD51,TFRC,TJP2,TMX1,TNFRSF10A	20
Cardiac Infarction	ST-elevation myocardial infarction	3.84E-01	TNNT2	1
Heart Failure	diastolic heart failure	3.84E-01	NPR1	1
Renal Necrosis/Cell Death	cell viability of kidney cell lines	3.85E-01	BAX,BIRC5,HYOU1,TAF4B	4
Renal Inflammation	focal glomerulonephritis	3.90E-01	PDLIM1,TP53	2
Renal Nephritis	focal glomerulonephritis	3.90E-01	PDLIM1,TP53	2
Cardiac Arrythmia	ventricular fibrillation	4.38E-01	ATP1A1,SCN5A	2
Liver Cirrhosis	biliary cirrhosis	4.41E-01	ALPL,EPCAM,FST,HLA-DPB1,HLA-DQB1,HLA-DRA,ITGA6	7
Cardiac Arteriopathy	coronary artery disease	4.63E-01	AGPAT5,APOE,CAMTA1,CD55,CDCP1,CORO2A,FLT1,FLT4,GABRA5,MARC1,MTHFD1L,NPR1,PLAU,SCN5A,SCNN1A,SLC25A21,TERT,TKT,TNNT2,TUBA4A	20
Glutathione Depletion In Liver	conjugation of glutathione	4.64E-01	GSTP1	1
Liver Cirrhosis	Cirrhosis	5.07E-01	ALPL,CIRH1A,EPCAM,FST,GSTP1,HLA-DPB1,HLA-DQB1,HLA-DRA,ITGA6,KRT8,PAH	11
Liver Cirrhosis	cirrhosis of liver	5.25E-01	ALPL,EPCAM,FST,HLA-DPB1,HLA-DQB1,HLA-DRA,ITGA6,KRT8,PAH	9
Increased Levels of Alkaline Phosphatase	increased activation of alkaline phosphatase	5.26E-01	GLI1,TNFSF11	2
Cardiac Arrythmia	paroxysmal supraventricular tachycardia	5.26E-01	SCN4A,SCN5A	2
Tachycardia	paroxysmal supraventricular tachycardia	5.26E-01	SCN4A,SCN5A	2
Cardiac Arrythmia	ventricular tachycardia	5.39E-01	ATP1A1,SCN4A,SCN5A	3
Tachycardia	ventricular tachycardia	5.39E-01	ATP1A1,SCN4A,SCN5A	3
Heart Failure	congestive heart failure	5.62E-01	ADM,DPP4,NPR1,TNNT2	4
Cardiac Congestive Cardiac Failure	congestive heart failure	5.62E-01	ADM,DPP4,NPR1,TNNT2	4
Nephrosis	minimal change nephrotic syndrome	5.64E-01	PDLIM1	1
Cardiac Arrythmia	Brugada syndrome	5.93E-01	SCN5A	1
Cardiac Hypertrophy	left ventricular hypertrophy	5.93E-01	TNNT2	1
Renal Inflammation	Nephritis	1.00E00	DSP,PDLIM1,TP53	3
Renal Nephritis	Nephritis	1.00E00	DSP,PDLIM1,TP53	3
Pulmonary Hypertension	Pulmonary Hypertension	1.00E00	NPR1,SCN5A	2
Heart Failure	heart failure	1.00E00	ADM,ATP1A1,DPP4,NPR1,PPP2R5A,SCN5A,SCNN1A,TNNT2	8
Liver Inflammation/Hepatitis	inflammation of liver	1.00E00	CXCL5,GSTP1,POLA1,POLD1	4
Liver Steatosis	nonalcoholic fatty liver disease	1.00E00	FABP5	1
Liver Cirrhosis	primary biliary cirrhosis	1.00E00	ALPL,FST,HLA-DPB1,HLA-DQB1,HLA-DRA,ITGA6	6
Kidney Failure	renal failure	1.00E00	ADM,DPP4,GSTP1,NPR1,TNNT2	5
Canonical Pathways
Ingenuity Canonical Pathways	-log(p-value)	Ratio	Molecules
Cell Cycle Control of Chromosomal Replication	7.29E00	4E-01	MCM5,MCM3,CDC45,RPA3,CDT1,ORC3,CDC6,ORC6,CHEK2,MCM4,DBF4,ORC1
Mitotic Roles of Polo-Like Kinase	7.17E00	2.81E-01	KIF23,CDC25C,ESPL1,CDC20,WEE1,PTTG1,CCNB2,PLK1,ANAPC1,PPP2R5A,CCNB1,PLK4,HSP90AB1,PPM1J,PKMYT1,KIF11,CHEK2,CDC25A
Role of BRCA1 in DNA Damage Response	5.89E00	2.54E-01	TP53,SMARCD2,PLK1,CHEK1,RAD51,FANCB,FANCD2,MSH2,RFC4,RFC2,MSH6,BRCA2,BRIP1,BLM,CHEK2,FANCA
Purine Nucleotides De Novo Biosynthesis II	5.82E00	6.36E-01	ADSS,ADSL,PAICS,PFAS,PPAT,ATIC,GART
Hereditary Breast Cancer Signaling	5.39E00	1.85E-01	TP53,NPM1,CDC25C,WEE1,SMARCD2,DDB2,PIK3R4,CHEK1,CCNB1,RAD51,FANCB,RRAS2,FANCD2,MSH2,RFC4,MSH6,RFC2,BRCA2,PIK3R2,BLM,CHEK2,FANCA
Folate Transformations I	5.21E00	6.67E-01	MTHFD1L,MTHFS,MTHFD2,SHMT1,MTHFD1,SHMT2
Cell Cycle: G2/M DNA Damage Checkpoint Regulation	4.78E00	2.5E-01	TP53,CDC25C,CKS2,WEE1,CKS1B,CCNB2,PKMYT1,PLK1,RPS6KA1,CHEK2,CHEK1,CCNB1
Role of Oct4 in Mammalian Embryonic Stem Cell Pluripotency	4.67E00	2.73E-01	TP53,NR6A1,NANOG,PHB,CCNF,PHC1,JARID2,NR2F6,IGF2BP1,SALL4,PARP1,POU5F1
Mismatch Repair in Eukaryotes	4.41E00	3.5E-01	MSH2,RFC4,MSH6,RFC2,FEN1,POLD1,EXO1
Tetrahydrofolate Salvage from 5,10-methenyltetrahydrofolate	4.03E00	8E-01	MTHFD1L,MTHFD2,MTHFD1,GART
Folate Polyglutamylation	4.03E00	8E-01	MTHFD1L,SHMT1,MTHFD1,SHMT2
Antigen Presentation Pathway	3.95E00	2.5E-01	HLA-DOA,HLA-A,HLA-C,HLA-DRA,PSMB8,CD74,TAP1,HLA-DPB1,TAP2,HLA-DPA1
Superpathway of Serine and Glycine Biosynthesis I	3.57E00	6.67E-01	PSAT1,PHGDH,SHMT1,SHMT2
5-aminoimidazole Ribonucleotide Biosynthesis I	3.53E00	1E00	PFAS,PPAT,GART
Inosine-5'-phosphate Biosynthesis II	3.53E00	1E00	ADSL,PAICS,ATIC
Spermidine Biosynthesis I	3.53E00	1E00	SRM,SMS,AMD1
Role of CHK Proteins in Cell Cycle Checkpoint Control	3.05E00	1.93E-01	TP53,CDC25C,RFC4,PPM1J,RFC2,CLSPN,PLK1,CHEK2,PPP2R5A,CDC25A,CHEK1
DNA Double-Strand Break Repair by Homologous Recombination	2.8E00	3.12E-01	RAD51,LIG1,GEN1,POLA1,BRCA2
ATM Signaling	2.79E00	1.8E-01	RAD51,TP53,CDC25C,SMC2,FANCD2,CCNB2,BLM,CHEK2,CDC25A,CHEK1,CCNB1
Dolichyl-diphosphooligosaccharide Biosynthesis	2.52E00	4E-01	ALG3,ALG6,ALG8,ALG1
RAN Signaling	2.51E00	2.78E-01	RCC1,CSE1L,RAN,RANBP1,IPO5
tRNA Charging	2.5E00	2.11E-01	LARS,YARS2,YARS,LARS2,EARS2,DARS2,TARS,IARS
p53 Signaling	2.47E00	1.47E-01	TP53,PMAIP1,RRM2B,PERP,BAX,PIK3R4,BIRC5,CHEK1,CCNG1,ADCK3,GNL3,PIK3R2,TNFRSF10A,CHEK2
Guanine and Guanosine Salvage I	2.35E00	1E00	PNP,HPRT1
Spermine Biosynthesis	2.35E00	1E00	SMS,AMD1
Uridine-5'-phosphate Biosynthesis	2.35E00	1E00	CAD,UMPS
Adenine and Adenosine Salvage I	2.35E00	1E00	PNP,APRT
Glycine Biosynthesis I	2.35E00	1E00	SHMT1,SHMT2
UVA-Induced MAPK Signaling	2.3E00	1.46E-01	TP53,PLCB2,ZC3HAV1,PARP12,PIK3R4,PARP1,RRAS2,PLCG2,PLCB3,PIK3R2,RPS6KA1,CYCS,PARP14
D-myo-inositol-5-phosphate Metabolism	2.2E00	1.17E-01	PTPN6,PLCB2,CDC25C,STYX,PAWR,ACP5,PPP2R5A,NUDT15,ITPK1,PLCG2,PPM1H,DUSP23,PLCB3,PALD1,ALPL,CDC25A,NUDT1
OX40 Signaling Pathway	2.05E00	1.48E-01	TRAF2,HLA-DOA,HLA-A,HLA-C,CD4,HLA-DRA,HLA-DQB1,HLA-DPB1,HLA-DPA1
Tight Junction Signaling	1.89E00	1.15E-01	CLDN10,TJP2,CRB3,MYH14,YBX3,CLDN7,CLDN6,PPP2R5A,OCLN,F11R,TJP3,CLDN4,PPM1J,CGN,VCL,ACTC1,VASP,CLDN3
Histidine Degradation III	1.89E00	3.75E-01	MTHFD1L,MTHFD2,MTHFD1
Allograft Rejection Signaling	1.87E00	1.36E-01	HLA-DOA,CD40,HLA-A,HLA-C,HLA-DRA,HLA-DQB1,HLA-DPB1,HLA-DPA1
Calcium-induced T Lymphocyte Apoptosis	1.85E00	1.48E-01	LCK,HLA-DOA,PRKCD,CD4,HLA-DRA,ITPR3,ATP2A3,HLA-DQB1,ORAI1
Virus Entry via Endocytic Pathways	1.82E00	1.3E-01	CD55,RRAS2,HLA-A,HLA-C,PRKCD,PLCG2,ITGA6,TFRC,PIK3R2,PIK3R4,ACTC1,ITGB5
Cytotoxic T Lymphocyte-mediated Apoptosis of Target Cells	1.82E00	1.54E-01	HLA-DOA,HLA-A,HLA-C,HLA-DRA,HLA-DQB1,CYCS,HLA-DPB1,HLA-DPA1
CTLA4 Signaling in Cytotoxic T Lymphocytes	1.79E00	1.26E-01	LCK,PTPN6,HLA-DOA,AP1M2,PPM1J,CD4,AP1S2,HLA-DRA,HLA-DQB1,PIK3R2,PIK3R4,PPP2R5A
Small Cell Lung Cancer Signaling	1.72E00	1.19E-01	TP53,MYC,TRAF2,CCNE1,SUV39H1,CKS1B,IKBKE,PIK3R2,CYCS,PIK3R4
D-myo-inositol (1,4,5,6)-Tetrakisphosphate Biosynthesis	1.68E00	1.09E-01	CDC25C,PTPN6,STYX,PAWR,ACP5,PPP2R5A,NUDT15,ITPK1,PPM1H,DUSP23,PALD1,ALPL,NUDT1,CDC25A
D-myo-inositol (3,4,5,6)-tetrakisphosphate Biosynthesis	1.68E00	1.09E-01	CDC25C,PTPN6,STYX,PAWR,ACP5,PPP2R5A,NUDT15,ITPK1,PPM1H,DUSP23,PALD1,ALPL,NUDT1,CDC25A
NF-κB Activation by Viruses	1.64E00	1.27E-01	LCK,TRAF2,RRAS2,PRKCD,CD4,ITGA6,IKBKE,PIK3R2,PIK3R4,ITGB5
IL-4 Signaling	1.64E00	1.33E-01	SOCS1,IL4R,PTPN6,HLA-DOA,RRAS2,HLA-DRA,HMGA1,HLA-DQB1,PIK3R2,PIK3R4
Stearate Biosynthesis I (Animals)	1.63E00	1.76E-01	SRD5A3,DHCR24,PPT1,SLC27A6,SLC27A3,ELOVL6
Mouse Embryonic Stem Cell Pluripotency	1.62E00	1.21E-01	TP53,MYC,NANOG,RRAS2,FZD5,TCF7L1,PIK3R2,PIK3R4,TCF7L2,ZFP42,FZD7,POU5F1
Serine Biosynthesis	1.61E00	5E-01	PSAT1,PHGDH
Glycine Betaine Degradation	1.6E00	3E-01	PIPOX,SHMT1,SHMT2
Telomerase Signaling	1.58E00	1.21E-01	TP53,MYC,ELF3,RRAS2,HSP90AB1,PPM1J,TERT,DKC1,PIK3R2,PIK3R4,TERF1,PPP2R5A
3-phosphoinositide Biosynthesis	1.56E00	1.01E-01	CDC25C,PTPN6,STYX,PAWR,ACP5,PIK3R4,PPP2R5A,NUDT15,ITPK1,PPM1H,DUSP23,PALD1,PIK3R2,ALPL,CDC25A,NUDT1
HER-2 Signaling in Breast Cancer	1.53E00	1.25E-01	TP53,CCNE1,RRAS2,FOXO1,PRKCD,ERBB3,PIK3R2,ERBB2,PIK3R4,ITGB5
Superpathway of Inositol Phosphate Compounds	1.51E00	9.74E-02	PTPN6,PLCB2,CDC25C,STYX,PAWR,ACP5,PIK3R4,PPP2R5A,NUDT15,ITPK1,PLCG2,PPM1H,DUSP23,PLCB3,PIK3R2,PALD1,ALPL,CDC25A,NUDT1
ErbB2-ErbB3 Signaling	1.5E00	1.38E-01	MYC,RRAS2,FOXO1,ETV4,ERBB3,PIK3R2,ERBB2,PIK3R4
Cyclins and Cell Cycle Regulation	1.5E00	1.15E-01	TP53,CCNA2,CCNE1,PPM1J,WEE1,SUV39H1,CCNB2,PPP2R5A,CDC25A,CCNB1
Aryl Hydrocarbon Receptor Signaling	1.49E00	1.06E-01	TP53,ALDH1B1,MGST1,NQO2,POLA1,BAX,CHEK1,MYC,CCNA2,CCNE1,HSP90AB1,ALDH16A1,GSTO2,CHEK2,GSTP1
Leukocyte Extravasation Signaling	1.47E00	1.02E-01	CLDN10,ITGA6,ARHGAP4,THY1,CLDN7,PIK3R4,CLDN6,F11R,MMP25,CLDN4,EZR,CYBA,PRKCD,PLCG2,PIK3R2,VCL,ACTC1,VASP,CLDN3,ARHGAP8/PRR5-ARHGAP8
DNA damage-induced 14-3-3σ Signaling	1.46E00	1.9E-01	TP53,CCNE1,CCNB2,CCNB1
VEGF Signaling	1.46E00	1.16E-01	PTPN6,RRAS2,FOXO1,PLCG2,FLT1,FLT4,EIF2S3,VCL,PIK3R2,PIK3R4,ACTC1
Synaptic Long Term Depression	1.44E00	1.07E-01	PLA2G16,PLCB2,PLA2G3,GRM4,PPP2R5A,PRDX6,RRAS2,PPM1J,PRKCD,PLCG2,NPR1,ITPR3,LYN,PLCB3,RYR1
eNOS Signaling	1.43E00	1.09E-01	ADCY2,FLT1,FLT4,HSPA9,SLC7A1,PIK3R4,HSPA2,LPAR3,CCNA2,HSPA4,HSP90AB1,PLCG2,ITPR3,PIK3R2
Pyruvate Fermentation to Lactate	1.41E00	4E-01	LDHA,LDHB
dTMP De Novo Biosynthesis	1.41E00	4E-01	SHMT1,SHMT2
Aldosterone Signaling in Epithelial Cells	1.35E00	1.03E-01	ICMT,PLCB2,HSPA9,DNAJC2,HSPD1,PIK3R4,HSPA2,SCNN1A,HSPA4,HSP90AB1,PRKCD,PLCG2,ITPR3,PLCB3,PIK3R2,AHCY
Role of p14/p19ARF in Tumor Suppression	1.33E00	1.56E-01	TP53,NPM1,NPM3,PIK3R2,PIK3R4
Thyroid Cancer Signaling	1.32E00	1.46E-01	TP53,MYC,CDH1,RRAS2,TCF7L1,TCF7L2
Transcriptional Regulatory Network in Embryonic Stem Cells	1.32E00	1.5E-01	NANOG,RIF1,CDYL,HESX1,TCF7L1,POU5F1
Ovarian Cancer Signaling	1.26E00	1.01E-01	TP53,GJA1,SUV39H1,TCF7L1,PIK3R4,RAD51,RRAS2,MSH2,MSH6,BRCA2,FZD5,PIK3R2,TCF7L2,FZD7
Pentose Phosphate Pathway (Non-oxidative Branch)	1.25E00	3.33E-01	TKT,TALDO1
UDP-N-acetyl-D-glucosamine Biosynthesis II	1.25E00	3.33E-01	GNPNAT1,GFPT2
Adenine and Adenosine Salvage III	1.25E00	3.33E-01	PNP,HPRT1
Glycogen Biosynthesis II (from UDP-D-Glucose)	1.25E00	3.33E-01	UGP2,GYG2
Endometrial Cancer Signaling	1.25E00	1.27E-01	TP53,MYC,CDH1,RRAS2,PIK3R2,ERBB2,PIK3R4
3-phosphoinositide Degradation	1.24E00	9.59E-02	CDC25C,PTPN6,STYX,PAWR,ACP5,PPP2R5A,NUDT15,ITPK1,PPM1H,DUSP23,PALD1,ALPL,NUDT1,CDC25A
Autoimmune Thyroid Disease Signaling	1.23E00	1.13E-01	HLA-DOA,CD40,HLA-A,HLA-C,HLA-DRA,HLA-DQB1
Role of NANOG in Mammalian Embryonic Stem Cell Pluripotency	1.22E00	1.06E-01	TP53,NANOG,RIF1,RRAS2,FZD5,TCF7L1,PIK3R2,PIK3R4,ZFP42,SALL4,FZD7,POU5F1
Neuregulin Signaling	1.22E00	1.05E-01	MYC,RRAS2,HSP90AB1,PRKCD,PLCG2,GRB7,ERBB3,PIK3R2,ERBB2,MATK
Glioblastoma Multiforme Signaling	1.22E00	9.55E-02	TP53,PLCB2,PDGFA,PIK3R4,MYC,CCNE1,RRAS2,FOXO1,PRKCD,PLCG2,ITPR3,PLCB3,FZD5,PIK3R2,FZD7
Pyrimidine Deoxyribonucleotides De Novo Biosynthesis I	1.21E00	2.14E-01	DUT,RRM2B,RRM2
S-methyl-5'-thioadenosine Degradation II	1.17E00	1E00	MTAP
Xanthine and Xanthosine Salvage	1.17E00	1E00	PNP
Angiopoietin Signaling	1.17E00	1.13E-01	RRAS2,FOXO1,GRB7,IKBKE,PIK3R2,PIK3R4,BIRC5,TEK
Acute Myeloid Leukemia Signaling	1.15E00	1.11E-01	MYC,RRAS2,PIM1,TCF7L1,PIK3R2,PIK3R4,TCF7L2,EIF4EBP1,PIM2
Sertoli Cell-Sertoli Cell Junction Signaling	1.15E00	9.29E-02	PLS1,CLDN10,TJP2,TUBA4A,YBX3,CLDN7,CLDN6,OCLN,MPP6,F11R,CDH1,TJP3,RRAS2,CLDN4,CGN,ACTC1,CLDN3
Phospholipases	1.14E00	1.27E-01	PLA2G16,HMOX1,PLCB2,PLCG2,PLA2G3,PLCB3,PRDX6
Estrogen-mediated S-phase Entry	1.14E00	1.48E-01	MYC,CCNA2,CCNE1,CDC25A
Telomere Extension by Telomerase	1.13E00	1.88E-01	PINX1,TERF1,XRCC5
CD28 Signaling in T Helper Cells	1.13E00	9.84E-02	LCK,PTPN6,HLA-DOA,ARPC1B,CARD11,CD4,HLA-DRA,ITPR3,IKBKE,HLA-DQB1,PIK3R2,PIK3R4
NF-κB Signaling	1.12E00	9.47E-02	SIGIRR,TNFSF11,FLT1,FLT4,PIK3R4,TNFRSF11A,LCK,TRAF2,RRAS2,CD40,CARD10,CARD11,PLCG2,FGFR4,PIK3R2,LTBR
Reelin Signaling in Neurons	1.1E00	1.1E-01	ARHGEF5,APOE,LCK,ARHGEF16,ITGA6,LYN,PIK3R2,PIK3R4,ARHGEF10
Macropinocytosis Signaling	1.08E00	1.05E-01	RRAS2,PDGFA,PRKCD,PLCG2,PIK3R2,RAB34,PIK3R4,ITGB5
NRF2-mediated Oxidative Stress Response	1.08E00	9.09E-02	MGST1,PRDX1,NQO2,DNAJA4,PIK3R4,SOD3,HMOX1,RRAS2,ERP29,PRKCD,FOSL1,PIK3R2,FKBP5,GSTO2,ACTC1,GSTP1,CBR1
Primary Immunodeficiency Signaling	1.07E00	1.09E-01	LCK,CD40,CD4,TAP1,TAP2,UNG
Prostate Cancer Signaling	1.07E00	9.89E-02	TP53,CCNE1,RRAS2,FOXO1,HSP90AB1,SUV39H1,PIK3R2,PIK3R4,GSTP1
14-3-3-mediated Signaling	1.06E00	1.02E-01	PLCB2,TRAF2,RRAS2,FOXO1,PRKCD,PLCG2,TUBA4A,PLCB3,PIK3R2,BAX,RPS6KA1,PIK3R4
Myc Mediated Apoptosis Signaling	1.04E00	1.17E-01	TP53,MYC,RRAS2,PIK3R2,BAX,CYCS,PIK3R4
Molecular Mechanisms of Cancer	1.04E00	8.01E-02	PLCB2,SUV39H1,PIK3R4,CHEK1,MYC,ARHGEF19,FANCD2,PIK3R2,CHEK2,CDC25A,TP53,PMAIP1,ADCY2,CDC25C,AURKA,BAX,ARHGEF5,CDH1,CCNE1,RRAS2,FOXO1,ARHGEF16,PRKCD,PLCB3,FZD5,CYCS,ARHGEF10,GLI1,FZD7
Antiproliferative Role of TOB in T Cell Signaling	1.04E00	1.54E-01	PABPC1,CCNA2,CCNE1,RPS6KA1
Salvage Pathways of Pyrimidine Deoxyribonucleotides	1.02E00	2.5E-01	APOBEC3B,TK1
p70S6K Signaling	1.02E00	9.84E-02	PLCB2,IL4R,RRAS2,F2RL1,PPM1J,PRKCD,PLCG2,LYN,PLCB3,PIK3R2,PIK3R4,PPP2R5A
Antioxidant Action of Vitamin C	1.01E00	1.02E-01	PLA2G16,HMOX1,PLCB2,PLCG2,PLA2G3,PLCB3,IKBKE,GSTO2,SLC2A3,PRDX6
Induction of Apoptosis by HIV1	1.01E00	1.11E-01	TP53,SLC25A13,TRAF2,IKBKE,BAX,CYCS,SLC25A5
Cell Cycle: G1/S Checkpoint Regulation	1.01E00	1.09E-01	TP53,MYC,CCNE1,PAK1IP1,SUV39H1,GNL3,CDC25A
Glutathione Redox Reactions I	9.98E-01	1.76E-01	GPX3,MGST1,PRDX6
γ-linolenate Biosynthesis II (Animals)	9.98E-01	1.76E-01	SLC27A6,SLC27A3,CYB5A
Cysteine Biosynthesis III (mammalia)	9.98E-01	1.76E-01	CBS,SUV39H1,AHCY
Human Embryonic Stem Cell Pluripotency	9.86E-01	8.72E-02	PDGFA,TDGF1,TCF7L1,PIK3R4,NANOG,FOXO1,FGFR4,FZD5,PIK3R2,TCF7L2,SALL4,FZD7,POU5F1
EIF2 Signaling	9.49E-01	8.84E-02	PABPC1,RPL36A/RPL36A-HNRNPH2,RPL17,RPL22L1,PIK3R4,RPL9,RPL10A,RRAS2,EIF3B,RPS26,EIF2S3,PIK3R2,RPS10,RPL39L,RPL13A,RPSA
Prolactin Signaling	9.46E-01	1.04E-01	MYC,SOCS1,RRAS2,PRKCD,PLCG2,NMI,PIK3R2,PIK3R4
B Cell Development	9.45E-01	1.38E-01	HLA-DOA,CD40,HLA-DRA,HLA-DQB1
Docosahexaenoic Acid (DHA) Signaling	9.34E-01	1.22E-01	FOXO1,PIK3R2,BAX,CYCS,PIK3R4
Glycogen Degradation II	9.3E-01	2.22E-01	PYGM,PYGL
Leucine Degradation I	9.3E-01	2.22E-01	BCAT1,MCCC2
Proline Degradation	8.89E-01	5E-01	PRODH
Choline Degradation I	8.89E-01	5E-01	CHDH
Flavin Biosynthesis IV (Mammalian)	8.89E-01	5E-01	FLAD1
Glycerol-3-phosphate Shuttle	8.89E-01	5E-01	GPD2
Cysteine Biosynthesis/Homocysteine Degradation	8.89E-01	5E-01	CBS
GADD45 Signaling	8.86E-01	1.43E-01	TP53,CCNE1,CCNB1
VEGF Family Ligand-Receptor Interactions	8.73E-01	1.03E-01	RRAS2,PRKCD,PLCG2,FLT1,FLT4,PLA2G3,PIK3R2,PIK3R4
PKCθ Signaling in T Lymphocytes	8.73E-01	8.66E-02	LCK,HLA-DOA,RRAS2,CARD11,PLCG2,CD4,HLA-DRA,IKBKE,HLA-DQB1,PIK3R2,PIK3R4
Breast Cancer Regulation by Stathmin1	8.71E-01	8.63E-02	TP53,PLCB2,ADCY2,TUBA4A,PIK3R4,PPP2R5A,ARHGEF19,ARHGEF5,CCNE1,RRAS2,ARHGEF16,PPM1J,PRKCD,ITPR3,PLCB3,PIK3R2,ARHGEF10
FcγRIIB Signaling in B Lymphocytes	8.66E-01	1.02E-01	RRAS2,PLCG2,LYN,PIK3R2,PIK3R4
Embryonic Stem Cell Differentiation into Cardiac Lineages	8.52E-01	2E-01	NANOG,POU5F1
Pentose Phosphate Pathway	8.52E-01	2E-01	TKT,TALDO1
Non-Small Cell Lung Cancer Signaling	8.48E-01	9.59E-02	TP53,RRAS2,SUV39H1,ITPR3,PIK3R2,ERBB2,PIK3R4
Melanoma Signaling	8.34E-01	1.14E-01	TP53,CDH1,RRAS2,PIK3R2,PIK3R4
Role of NFAT in Regulation of the Immune Response	8.26E-01	8.06E-02	PLCB2,HLA-DOA,CD4,IKBKE,HLA-DQB1,PIK3R4,LCK,RRAS2,PLCG2,ITPR3,HLA-DRA,LYN,PLCB3,PIK3R2,ORAI1
Wnt/β-catenin Signaling	8.26E-01	8.82E-02	TP53,GJA1,TCF7L1,SOX13,PPP2R5A,MYC,CDH1,CDH3,PPM1J,FZD5,SFRP1,SOX15,TCF7L2,POU5F1,FZD7
G Protein Signaling Mediated by Tubby	8.25E-01	1.08E-01	PLCB2,LCK,PLCG2,PLCB3
iCOS-iCOSL Signaling in T Helper Cells	8.24E-01	8.93E-02	LCK,HLA-DOA,CD40,CD4,HLA-DRA,ITPR3,IKBKE,HLA-DQB1,PIK3R2,PIK3R4
Lymphotoxin β Receptor Signaling	8.24E-01	1.07E-01	TRAF2,IKBKE,LTBR,PIK3R2,CYCS,PIK3R4
Cdc42 Signaling	8.13E-01	8.39E-02	IQGAP2,DIAPH1,HLA-DOA,ARPC1B,HLA-A,HLA-C,DIAPH3,HLA-DRA,HLA-DQB1,IQGAP1,HLA-DPB1,HLA-DPA1
Erythropoietin Signaling	7.99E-01	9.46E-02	SOCS1,PTPN6,RRAS2,PRKCD,PLCG2,PIK3R2,PIK3R4
Thrombopoietin Signaling	7.97E-01	1.02E-01	MYC,RRAS2,PRKCD,PLCG2,PIK3R2,PIK3R4
Systemic Lupus Erythematosus Signaling	7.91E-01	7.79E-02	PTPN6,SNRPB,HLA-A,PIK3R4,SNRPN,LCK,RRAS2,CD40,HLA-C,PLCG2,LYN,SNRPD1,SNRPD2,PIK3R2,SNRPD3,LSM3,LSM4,PIM2
IL-8 Signaling	7.85E-01	8.33E-02	PLCB2,FLT1,FLT4,IKBKE,BAX,IQGAP1,PIK3R4,EIF4EBP1,HMOX1,CDH1,RRAS2,PRKCD,PIK3R2,VASP,ITGB5,TEK
Glycogen Degradation III	7.84E-01	1.82E-01	PYGM,PYGL
Growth Hormone Signaling	7.76E-01	9.86E-02	SOCS1,PTPN6,PRKCD,PLCG2,PIK3R2,RPS6KA1,PIK3R4
Graft-versus-Host Disease Signaling	7.74E-01	1.09E-01	HLA-DOA,HLA-A,HLA-C,HLA-DRA,HLA-DQB1
Type I Diabetes Mellitus Signaling	7.68E-01	8.85E-02	SOCS1,TRAF2,HLA-DOA,HLA-A,HLA-C,HLA-DRA,IKBKE,HLA-DQB1,HSPD1,CYCS
Pancreatic Adenocarcinoma Signaling	7.68E-01	8.7E-02	RAD51,TP53,HMOX1,CCNE1,SUV39H1,BRCA2,PIK3R2,ERBB2,PIK3R4,BIRC5
Triacylglycerol Biosynthesis	7.55E-01	1.21E-01	AGPAT5,PPAP2A,PPAP2C,ELOVL6
Role of Tissue Factor in Cancer	7.5E-01	9.17E-02	TP53,LCK,RRAS2,F2RL1,ITGA6,LYN,PIK3R2,RPS6KA1,PIK3R4,ITGB5
Glioma Invasiveness Signaling	7.46E-01	1.02E-01	RRAS2,HMMR,PLAU,PIK3R2,PIK3R4,ITGB5
Nitric Oxide Signaling in the Cardiovascular System	7.36E-01	8.82E-02	HSP90AB1,PRKCD,FLT1,FLT4,ITPR3,SLC7A1,ATP2A3,PIK3R2,PIK3R4
PRPP Biosynthesis I	7.27E-01	3.33E-01	PRPS2
Ascorbate Recycling (Cytosolic)	7.27E-01	3.33E-01	GSTO2
Glutathione Redox Reactions II	7.27E-01	3.33E-01	TXNDC12
Hypusine Biosynthesis	7.27E-01	3.33E-01	EIF5A
1D-myo-inositol Hexakisphosphate Biosynthesis V (from Ins(1,3,4)P3)	7.27E-01	3.33E-01	ITPK1
Oxidized GTP and dGTP Detoxification	7.27E-01	3.33E-01	NUDT1
Tyrosine Biosynthesis IV	7.27E-01	3.33E-01	PAH
4-aminobutyrate Degradation I	7.27E-01	3.33E-01	SUCLG2
Guanosine Nucleotides Degradation III	7.23E-01	1.67E-01	GDA,PNP
Interferon Signaling	7.22E-01	1.18E-01	SOCS1,PSMB8,BAX,TAP1
Glutathione-mediated Detoxification	7.07E-01	1.3E-01	MGST1,GSTO2,GSTP1
PI3K Signaling in B Lymphocytes	7E-01	8.59E-02	PLCB2,IL4R,RRAS2,CD40,CARD10,PLCG2,ITPR3,LYN,PLCB3,IKBKE,PIK3R2
Retinoic acid Mediated Apoptosis Signaling	6.99E-01	9.84E-02	ZC3HAV1,PARP12,CYCS,TNFRSF10A,PARP14,PARP1
ErbB Signaling	6.84E-01	9.2E-02	RRAS2,FOXO1,PRKCD,PLCG2,ERBB3,PIK3R2,ERBB2,PIK3R4
Tumoricidal Function of Hepatic Natural Killer Cells	6.7E-01	1.25E-01	M6PR,BAX,CYCS
Fatty Acid Activation	6.69E-01	1.54E-01	SLC27A6,SLC27A3
Leptin Signaling in Obesity	6.69E-01	9.21E-02	PLCB2,ADCY2,FOXO1,PLCG2,PLCB3,PIK3R2,PIK3R4
Bladder Cancer Signaling	6.66E-01	8.99E-02	TP53,MYC,CDH1,RRAS2,MMP25,SUV39H1,ERBB2,FGF19
Neuropathic Pain Signaling In Dorsal Horn Neurons	6.66E-01	8.82E-02	PLCB2,KCNN2,PRKCD,PLCG2,ITPR3,PLCB3,PIK3R2,GRM4,PIK3R4
HIF1α Signaling	6.49E-01	8.82E-02	TP53,RRAS2,MMP25,EGLN3,PIK3R2,PIK3R4,LDHA,SLC2A3,LDHB
Factors Promoting Cardiogenesis in Vertebrates	6.48E-01	8.79E-02	CCNE1,PRKCD,CDC6,TDGF1,FZD5,TCF7L1,TCF7L2,FZD7
Endothelin-1 Signaling	6.44E-01	8.28E-02	PLA2G16,PLCB2,ADCY2,PLA2G3,PIK3R4,PRDX6,MYC,HMOX1,RRAS2,PRKCD,PLCG2,ITPR3,PLCB3,PIK3R2
Apoptosis Signaling	6.31E-01	8.7E-02	TP53,RRAS2,PLCG2,IKBKE,BAX,RPS6KA1,CYCS,PARP1
DNA Double-Strand Break Repair by Non-Homologous End Joining	6.2E-01	1.25E-01	XRCC5,PARP1
Leukotriene Biosynthesis	6.2E-01	1.43E-01	DPEP3,GGT1
γ-glutamyl Cycle	6.2E-01	1.43E-01	GGCT,GGT1
Vitamin-C Transport	6.2E-01	1.43E-01	GSTO2,SLC2A3
Actin Cytoskeleton Signaling	6.2E-01	7.39E-02	PFN1,ARPC1B,PDGFA,DIAPH3,MYH14,IQGAP1,PIK3R4,IQGAP2,DIAPH1,RRAS2,EZR,DIAPH2,PIK3R2,VCL,ACTC1,FGF19,MATK
Regulation of eIF4 and p70S6K Signaling	6.19E-01	7.59E-02	PABPC1,RRAS2,EIF3B,RPS26,PPM1J,EIF2S3,PIK3R2,RPS10,PIK3R4,PPP2R5A,EIF4EBP1,RPSA
Arsenate Detoxification I (Glutaredoxin)	6.17E-01	2.5E-01	PNP
Creatine-phosphate Biosynthesis	6.17E-01	2.5E-01	CKMT1A/CKMT1B
Heme Degradation	6.17E-01	2.5E-01	HMOX1
Eumelanin Biosynthesis	6.17E-01	2.5E-01	DDT
Myo-inositol Biosynthesis	6.17E-01	2.5E-01	IMPA2
Rapoport-Luebering Glycolytic Shunt	6.17E-01	2.5E-01	PGAM1
Lactose Degradation III	6.17E-01	2.5E-01	GLB1L3
Phenylalanine Degradation I (Aerobic)	6.17E-01	2.5E-01	PAH
D-myo-inositol (1,4,5)-Trisphosphate Biosynthesis	6.02E-01	1.15E-01	PLCB2,PLCG2,PLCB3
CDP-diacylglycerol Biosynthesis I	5.77E-01	1.33E-01	AGPAT5,CDS1
Methionine Degradation I (to Homocysteine)	5.77E-01	1.33E-01	SUV39H1,AHCY
UVB-Induced MAPK Signaling	5.75E-01	9.26E-02	TP53,PRKCD,PIK3R2,PIK3R4,EIF4EBP1
Chronic Myeloid Leukemia Signaling	5.65E-01	7.84E-02	TP53,MYC,RRAS2,SUV39H1,IKBKE,PIK3R2,PIK3R4,CBLC
Agranulocyte Adhesion and Diapedesis	5.62E-01	7.95E-02	CLDN10,PODXL,MYH14,ITGA6,CXCL5,CLDN7,SDC4,CLDN6,CLDN4,MMP25,EZR,CCL26,ACTC1,CLDN3
NGF Signaling	5.57E-01	8.11E-02	TP53,RRAS2,PRKCD,PLCG2,IKBKE,PIK3R2,BAX,RPS6KA1,PIK3R4
Role of PKR in Interferon Induction and Antiviral Response	5.57E-01	9.09E-02	TP53,TRAF2,IKBKE,CYCS
Remodeling of Epithelial Adherens Junctions	5.56E-01	9.09E-02	CDH1,ARPC1B,TUBA4A,VCL,IQGAP1,ACTC1
IL-2 Signaling	5.54E-01	8.93E-02	SOCS1,LCK,RRAS2,PIK3R2,PIK3R4
Fcγ Receptor-mediated Phagocytosis in Macrophages and Monocytes	5.5E-01	8.42E-02	HMOX1,ARPC1B,PRKCD,EZR,LYN,PIK3R2,ACTC1,VASP
Ceramide Signaling	5.43E-01	8.33E-02	RRAS2,CNKSR1,PPM1J,PIK3R2,CYCS,PIK3R4,PPP2R5A
PI3K/AKT Signaling	5.38E-01	7.41E-02	TP53,NANOG,RRAS2,FOXO1,HSP90AB1,PPM1J,IKBKE,PIK3R2,PPP2R5A,EIF4EBP1
JAK/Stat Signaling	5.38E-01	8.57E-02	SOCS1,PTPN6,RRAS2,PIK3R2,PIK3R4,CCKBR
Granzyme B Signaling	5.37E-01	1.25E-01	CYCS,PARP1
Glioma Signaling	5.35E-01	7.55E-02	TP53,RRAS2,PDGFA,PRKCD,PLCG2,SUV39H1,PIK3R2,PIK3R4
Glycerol Degradation I	5.34E-01	2E-01	GPD2
NAD Salvage Pathway III	5.34E-01	2E-01	NMRK2
Lysine Degradation II	5.34E-01	2E-01	AASS
Lysine Degradation V	5.34E-01	2E-01	PIPOX
Glutamate Degradation III (via 4-aminobutyrate)	5.34E-01	2E-01	SUCLG2
GDNF Family Ligand-Receptor Interactions	5.2E-01	8.57E-02	RRAS2,ARTN,PLCG2,ITPR3,PIK3R2,PIK3R4
Regulation of Cellular Mechanics by Calpain Protease	5.15E-01	7.14E-02	CCNA2,CCNE1,RRAS2,EZR,VCL
Fatty Acid β-oxidation I	5.14E-01	1.03E-01	SLC27A6,SLC27A3,ACAA2
Gap Junction Signaling	5.09E-01	7.69E-02	PLCB2,ADCY2,RRAS2,PRKCD,PLCG2,NPR1,ITPR3,TUBA4A,PLCB3,PIK3R2,PIK3R4,ACTC1
Phosphatidylglycerol Biosynthesis II (Non-plastidic)	5E-01	1.18E-01	AGPAT5,CDS1
Mitochondrial L-carnitine Shuttle Pathway	5E-01	1.11E-01	SLC27A6,SLC27A3
Superpathway of Methionine Degradation	4.89E-01	1E-01	CBS,SUV39H1,AHCY
Basal Cell Carcinoma Signaling	4.87E-01	8.33E-02	TP53,FZD5,TCF7L1,GLI1,TCF7L2,FZD7
FXR/RXR Activation	4.82E-01	8.33E-02	APOE,MLXIPL,PCK2,FOXO1,FGFR4,FOXA3,FGF19
Melanocyte Development and Pigmentation Signaling	4.82E-01	8.05E-02	ADCY2,PTPN6,RRAS2,PLCG2,PIK3R2,RPS6KA1,PIK3R4
Salvage Pathways of Pyrimidine Ribonucleotides	4.82E-01	8.33E-02	CDK18,PIM1,PRKCD,UPP1,PLK1,UCK2,TTK
mTOR Signaling	4.79E-01	7.41E-02	PIK3R4,PPP2R5A,EIF4EBP1,HMOX1,RRAS2,EIF3B,RPS26,PPM1J,PRKCD,PIK3R2,RPS6KA1,RPS10,RPSA,ARHGAP8/PRR5-ARHGAP8
IL-3 Signaling	4.71E-01	8.22E-02	PTPN6,RRAS2,FOXO1,PRKCD,PIK3R2,PIK3R4
Protein Ubiquitination Pathway	4.7E-01	7.22E-02	USP28,UCHL3,CDC20,HLA-A,USP9X,HSPA9,DNAJC2,HSPD1,PSMB8,ANAPC1,TAP1,HSPA2,USO1,HSPA4,USP44,HSP90AB1,HLA-C,PSMA2,TAP2
Glycine Cleavage Complex	4.69E-01	1.67E-01	GLDC
Selenocysteine Biosynthesis II (Archaea and Eukaryotes)	4.69E-01	1.67E-01	SEPHS1
Superoxide Radicals Degradation	4.69E-01	1.67E-01	SOD3
Purine Ribonucleosides Degradation to Ribose-1-phosphate	4.69E-01	1.67E-01	PNP
α-Adrenergic Signaling	4.68E-01	7.61E-02	ADCY2,PYGM,RRAS2,PRKCD,PLCG2,ITPR3,PYGL
Purine Nucleotides Degradation II (Aerobic)	4.67E-01	1.11E-01	GDA,PNP
CCR3 Signaling in Eosinophils	4.65E-01	7.44E-02	PLCB2,RRAS2,PRKCD,ITPR3,PLA2G3,PLCB3,CCL26,PIK3R2,PIK3R4
Sperm Motility	4.65E-01	7.5E-02	PLA2G16,PLCB2,PRKCD,PLCG2,NPR1,ITPR3,PLA2G3,PLCB3,PRDX6
ErbB4 Signaling	4.61E-01	8.2E-02	RRAS2,PRKCD,PLCG2,PIK3R2,PIK3R4
Dendritic Cell Maturation	4.58E-01	6.77E-02	PLCB2,HLA-DOA,HLA-A,IKBKE,HLA-DQB1,PIK3R4,CD40,HLA-C,PLCG2,HLA-DRA,PLCB3,LTBR,PIK3R2
Caveolar-mediated Endocytosis Signaling	4.56E-01	7.41E-02	CD55,HLA-A,HLA-C,ITGA6,ACTC1,ITGB5
FAK Signaling	4.54E-01	7.14E-02	RRAS2,PLCG2,HMMR,VCL,PIK3R2,PIK3R4,ACTC1
MSP-RON Signaling Pathway	4.5E-01	8.51E-02	KLKB1,PIK3R2,PIK3R4,ACTC1
RhoA Signaling	4.41E-01	7.83E-02	PFN1,ARPC1B,ANLN,EZR,EPHA1,ARHGAP4,ACTC1,LPAR3,ARHGAP8/PRR5-ARHGAP8
Role of JAK2 in Hormone-like Cytokine Signaling	4.41E-01	8.82E-02	SOCS1,PTPN6,SH2B3
Serotonin Receptor Signaling	4.41E-01	9.38E-02	HTR7,HTR1A,HTR1D
Tryptophan Degradation III (Eukaryotic)	4.37E-01	1.05E-01	IDO1,GCDH
Antiproliferative Role of Somatostatin Receptor 2	4.28E-01	7.81E-02	PTPN6,RRAS2,NPR1,PIK3R2,PIK3R4
Role of JAK1 and JAK3 in γc Cytokine Signaling	4.28E-01	7.94E-02	SOCS1,IL4R,RRAS2,PIK3R2,PIK3R4
TWEAK Signaling	4.19E-01	8.11E-02	TRAF2,IKBKE,CYCS
Tryptophan Degradation to 2-amino-3-carboxymuconate Semialdehyde	4.16E-01	1.43E-01	IDO1
Crosstalk between Dendritic Cells and Natural Killer Cells	4.14E-01	7.69E-02	MICB,CD40,HLA-A,HLA-C,HLA-DRA,LTBR,ACTC1
IL-15 Signaling	4.13E-01	7.69E-02	LCK,TRAF2,RRAS2,PIK3R2,PIK3R4
Eicosanoid Signaling	4.13E-01	8.2E-02	PLA2G16,DPEP3,PLA2G3,GGT1,PRDX6
P2Y Purigenic Receptor Signaling Pathway	4.08E-01	7.2E-02	MYC,PLCB2,ADCY2,RRAS2,PRKCD,PLCG2,PLCB3,PIK3R2,PIK3R4
CD40 Signaling	3.98E-01	7.35E-02	TRAF2,CD40,IKBKE,PIK3R2,PIK3R4
Pyridoxal 5'-phosphate Salvage Pathway	3.98E-01	8.06E-02	CDK18,PIM1,PRKCD,PLK1,TTK
GM-CSF Signaling	3.98E-01	7.58E-02	RRAS2,PIM1,LYN,PIK3R2,PIK3R4
PDGF Signaling	3.87E-01	7.59E-02	MYC,RRAS2,PDGFA,PLCG2,PIK3R2,PIK3R4
NAD Salvage Pathway II	3.83E-01	9.52E-02	NMRK2,ACP5
Granulocyte Adhesion and Diapedesis	3.81E-01	7.23E-02	CLDN10,CLDN4,MMP25,EZR,ITGA6,THY1,CXCL5,CCL26,CLDN7,SDC4,CLDN6,CLDN3
CNTF Signaling	3.81E-01	7.69E-02	RRAS2,PIK3R2,RPS6KA1,PIK3R4
Cell Cycle Regulation by BTG Family Proteins	3.79E-01	8.33E-02	CCNE1,PPM1J,PPP2R5A
Regulation of the Epithelial-Mesenchymal Transition Pathway	3.77E-01	6.95E-02	ESRP2,TCF7L1,PIK3R4,HMGA2,CDH1,RRAS2,FGFR4,FZD5,PIK3R2,TCF7L2,CLDN3,FZD7,FGF19
fMLP Signaling in Neutrophils	3.72E-01	6.72E-02	PLCB2,RRAS2,ARPC1B,PRKCD,ITPR3,PLCB3,PIK3R2,PIK3R4
Citrulline Biosynthesis	3.72E-01	1.25E-01	PRODH
Renin-Angiotensin Signaling	3.61E-01	7.08E-02	ADCY2,PTPN6,RRAS2,PRKCD,PLCG2,ITPR3,PIK3R2,PIK3R4
Glycolysis I	3.59E-01	9.09E-02	ENO1,PGAM1
Nur77 Signaling in T Lymphocytes	3.5E-01	7.02E-02	HLA-DOA,HLA-DRA,HLA-DQB1,CYCS
Cellular Effects of Sildenafil (Viagra)	3.48E-01	7.14E-02	PLCB2,ADCY2,KCNN2,SLC4A11,PLCG2,MYH14,ITPR3,PLCB3,ACTC1
Clathrin-mediated Endocytosis Signaling	3.45E-01	6.81E-02	APOE,ARPC1B,PDGFA,USP9X,PIK3R4,APOC1,CD2AP,TFRC,PIK3R2,ACTC1,MYO1E,ITGB5,FGF19
Role of MAPK Signaling in the Pathogenesis of Influenza	3.43E-01	7.58E-02	PLA2G16,RRAS2,PLA2G3,BAX,PRDX6
Pyrimidine Ribonucleotides De Novo Biosynthesis	3.36E-01	8.7E-02	CAD,UMPS
Gluconeogenesis I	3.36E-01	8.7E-02	ENO1,PGAM1
T Cell Receptor Signaling	3.35E-01	6.86E-02	LCK,RRAS2,CARD11,CD4,IKBKE,PIK3R2,PIK3R4
Role of Macrophages, Fibroblasts and Endothelial Cells in Rheumatoid Arthritis	3.34E-01	6.43E-02	SOCS1,TNFSF11,PLCB2,PDGFA,IKBKE,TCF7L1,PIK3R4,MYC,TRAF2,RRAS2,F2RL1,PRKCD,PLCG2,PLCB3,FZD5,PIK3R2,LTBR,SFRP1,TCF7L2,FZD7
Assembly of RNA Polymerase I Complex	3.34E-01	8.33E-02	POLR1B
Calcium Transport I	3.34E-01	1.11E-01	ATP2A3
UDP-N-acetyl-D-galactosamine Biosynthesis II	3.34E-01	1.11E-01	GNPNAT1
T Helper Cell Differentiation	3.31E-01	7.25E-02	IL4R,HLA-DOA,CD40,HLA-DRA,HLA-DQB1
Agrin Interactions at Neuromuscular Junction	3.31E-01	7.46E-02	RRAS2,ITGA6,ERBB3,ERBB2,ACTC1
ERK/MAPK Signaling	3.3E-01	6.53E-02	VRK2,PLA2G3,PIK3R4,PPP2R5A,EIF4EBP1,MYC,ELF3,RRAS2,PPM1J,PRKCD,PLCG2,PIK3R2,RPS6KA1
Xenobiotic Metabolism Signaling	3.24E-01	6.74E-02	ALDH1B1,MGST1,CHST4,NQO2,UGT8,PIK3R4,PPP2R5A,SOD3,HMOX1,RRAS2,HSP90AB1,PPM1J,PRKCD,PIK3R2,GSTO2,ALDH16A1,PNPLA6,GSTP1
Role of JAK1, JAK2 and TYK2 in Interferon Signaling	3.16E-01	7.69E-02	SOCS1,PTPN6
Colorectal Cancer Metastasis Signaling	3.14E-01	6.56E-02	TP53,ADCY2,TCF7L1,BAX,PIK3R4,BIRC5,MYC,CDH1,RRAS2,MMP25,MSH2,MSH6,FZD5,PIK3R2,TCF7L2,FZD7
Role of IL-17A in Arthritis	3.09E-01	6.67E-02	CXCL5,PIK3R2,RPS6KA1,PIK3R4
Paxillin Signaling	3.05E-01	6.36E-02	RRAS2,ITGA6,VCL,PIK3R2,PIK3R4,ACTC1,ITGB5
Type II Diabetes Mellitus Signaling	3.04E-01	6.3E-02	SOCS1,TRAF2,PRKCD,SLC27A6,IKBKE,SLC27A3,PIK3R2,PIK3R4
Epithelial Adherens Junction Signaling	3.03E-01	6.94E-02	CDH1,RRAS2,ARPC1B,MYH14,TUBA4A,TCF7L1,VCL,IQGAP1,ACTC1,TCF7L2
Oleate Biosynthesis II (Animals)	3.02E-01	1E-01	CYB5A
NAD Phosphorylation and Dephosphorylation	3.02E-01	1E-01	ACP5
Synaptic Long Term Potentiation	2.87E-01	6.84E-02	PLCB2,RRAS2,PRKCD,PLCG2,ITPR3,PLCB3,GRM4,RPS6KA1
RANK Signaling in Osteoclasts	2.86E-01	6.52E-02	TRAF2,TNFSF11,IKBKE,PIK3R2,TNFRSF11A,PIK3R4
FLT3 Signaling in Hematopoietic Progenitor Cells	2.85E-01	6.85E-02	RRAS2,PIK3R2,RPS6KA1,PIK3R4,EIF4EBP1
PEDF Signaling	2.85E-01	6.49E-02	TP53,RRAS2,IKBKE,PIK3R2,PIK3R4
Role of RIG1-like Receptors in Antiviral Innate Immunity	2.82E-01	6.67E-02	TRAF2,IKBKE,TRIM25
MIF Regulation of Innate Immunity	2.82E-01	6.67E-02	TP53,PLA2G3,CD74
Gα12/13 Signaling	2.79E-01	6.5E-02	CDH1,RRAS2,F2RL1,CDH3,IKBKE,PIK3R2,PIK3R4,LPAR3
PTEN Signaling	2.79E-01	6.15E-02	RRAS2,FOXO1,FGFR4,FLT1,FLT4,IKBKE,PIK3R2,TNFRSF11A
CDK5 Signaling	2.76E-01	6.74E-02	ADCY2,RRAS2,PPM1J,CABLES1,ITGA6,PPP2R5A
Glutaryl-CoA Degradation	2.73E-01	9.09E-02	GCDH
Acyl-CoA Hydrolysis	2.73E-01	9.09E-02	PPT1
UVC-Induced MAPK Signaling	2.68E-01	7.14E-02	TP53,RRAS2,PRKCD
LPS-stimulated MAPK Signaling	2.64E-01	6.33E-02	RRAS2,PRKCD,IKBKE,PIK3R2,PIK3R4
Death Receptor Signaling	2.61E-01	6.45E-02	TRAF2,IKBKE,CYCS,TNFRSF10A
Androgen Biosynthesis	2.49E-01	8.33E-02	SRD5A3
Histamine Degradation	2.49E-01	8.33E-02	ALDH1B1
TNFR2 Signaling	2.46E-01	6.25E-02	TRAF2,IKBKE
Sonic Hedgehog Signaling	2.32E-01	6.45E-02	GLI1,CCNB1
Role of IL-17A in Psoriasis	2.27E-01	7.69E-02	CXCL5
NAD biosynthesis II (from tryptophan)	2.27E-01	7.69E-02	IDO1
Choline Biosynthesis III	2.27E-01	7.69E-02	HMOX1
Cholesterol Biosynthesis I	2.27E-01	7.69E-02	DHCR24
Urate Biosynthesis/Inosine 5'-phosphate Degradation	2.27E-01	7.69E-02	PNP
Cholesterol Biosynthesis II (via 24,25-dihydrolanosterol)	2.27E-01	7.69E-02	DHCR24
Cholesterol Biosynthesis III (via Desmosterol)	2.27E-01	7.69E-02	DHCR24
Fatty Acid α-oxidation	2.27E-01	7.69E-02	ALDH1B1
nNOS Signaling in Skeletal Muscle Cells	2.07E-01	5.26E-02	RYR1
Isoleucine Degradation I	2.07E-01	7.14E-02	BCAT1
Superpathway of Citrulline Metabolism	2.07E-01	7.14E-02	PRODH
Phenylalanine Degradation IV (Mammalian, via Side Chain)	2.07E-01	7.14E-02	SLC27A3
Colanic Acid Building Blocks Biosynthesis	2.07E-01	7.14E-02	UGP2
Upstream Regulators
Upstream Regulator	Molecule Type	p-value of overlap	Target molecules in dataset	Mechanistic Network
E2F4	transcription regulator	3.52E-33	ANLN,ASF1B,AURKB,CCNA2,CDC25A,CDC6,CDCA4,CENPE,CHEK1,CHEK2,CKS1B,CKS2,COX7C,DBF4,DDX11,DUT,FAM60A,FEN1,GINS1,H2AFZ,HMMR,KIAA0101,KIF22,MCM10,MCM3,MCM5,MRTO4,MSH2,MT1G,MTHFD1,MYBL2,MYC,NCL,ORC1,PLK1,PLSCR1,POLA1,POLA2,POLD1,PSAT1,PTTG1,RAD51,RAD51AP1,RAD54L,RFC2,RFC4,RPA3,RRM2,SLC3A2,SMC2,SMC4,SRSF2,TEAD4,TERT,TK1,TP53,TRAF2,TTK,UMPS,UNG,ZNF267
E2F1	transcription regulator	1.72E-17	AURKB,BIRC5,CCNA2,CCNB1,CCNE1,CDC25A,CDC6,CDCA4,DBF4,DDX11,DUT,FAM60A,FEN1,FLT1,GINS1,KIAA0101,KIF23,LCK,MCM10,MCM3,MCM5,MSH2,MT1G,MTHFD1,MYBL2,MYC,NCL,POLA1,POLA2,PSAT1,RAD51,RAD54L,RFC2,RFC4,RPA3,RRM2,SLC3A2,SMC4,SRSF2,TERT,TK1,TP53,UMPS,UNG	E2F1,HDAC1,MYC,RB1,SP1,TP53
NUPR1	transcription regulator	2.24E-12	ADM,AEN,ALG8,APOBEC3B,ARHGAP11A,AURKA,BLM,BUB1,BUB1B,C19orf33,C1orf112,CCNA2,CCNB2,CCNF,CDC25C,CDCA2,CENPI,CXCL5,DHCR24,DNMT3B,DUSP5,E2F8,ERCC6L,ERMP1,ESPL1,EXO1,FAM111B,FAM72D,FAM83G,FANCD2,GINS1,HJURP,HNRNPM,HSPA2,IGF2BP3,ITPR3,KIF11,KIF20A,KIF23,KIFC1,LARS2,LRRC16A,MCM10,MGME1,MMS22L,MSH6,MTFR2,MX2,MYC,PARP1,PHF15,PIM1,PLK1,POLA2,POLE2,POLQ,RAB17,RAD51,RCL1,SAMHD1,SIX4,SLC39A8,SLC6A6,SPAG5,SPC…
TP53	transcription regulator	8.31E-12	APOE,ARPC1B,AURKA,AURKB,BAX,BIRC5,BUB1,BUB1B,CCNA2,CCNB1,CCNB1IP1,CCNG1,CDC20,CDC25A,CDC25C,CDC6,CDH1,CDT1,CHEK1,CHEK2,DBF4,DDB2,DUSP5,DUT,FEN1,FOSL1,FOXO1,GART,GNL3,HERC5,HMMR,HMOX1,KIAA0101,KIF23,KRT8,LDHA,MCM3,MCM4,MSH2,MSH6,MYC,PERP,PIK3R4,PIM1,PLK1,PMAIP1,POLD1,POLE2,PPT1,PRIM1,PRODH,PTPN6,PYCARD,RAD54B,RFC4,RPS6KA1,RRM2,RRM2B,SLC16A1,SMC2,SMC4,ST14,TAP1,TAP2,TCF7L2,TERT,TMEM97,TNFRSF10A,TP5…	CDKN1A,ESR1,HDAC1,MYC,RB1,RBL1,SP1,TP53
MYC	transcription regulator	2.20E-11	ATAD3A/ATAD3B,BAX,BCAT1,CAD,CCNB1,CCNE1,CDC25A,CHEK1,DDB2,DDX11,DKC1,ENO1,FOXM1,GJA1,HERC5,IGF2BP1,LDHA,MTHFD1,MYC,NCL,PERP,PHB,PLAU,PMAIP1,PRODH,RAD51,RCC1,RRM2B,SHMT1,SHMT2,SLC25A19,TERT,TP53	MYC,RB1,RBL1
SYVN1	transporter	2.97E-09	ASF1B,ATP1A1,BCAT1,HERC5,HLA-A,HLA-C,HNRNPM,ITGA6,LDHB,PFN1,PODXL,PTBP1,RAB34,SLC16A1,SLC1A5,SLC20A1,SLC27A3,SLC2A3,SLC39A10,SLC3A2,SLC43A3,SLC6A6,SLC7A2,SLC7A5,SLCO4A1,STOM,TARS,TFRC,ZC3HAV1
ERBB2	kinase	1.29E-08	BIRC5,BRIP1,BUB1,BUB1B,CCNA2,CCNB1,CCNB2,CCNE1,CDC20,CDC25C,CDT1,CENPE,CKS1B,CKS2,CLDN4,ERBB3,ESPL1,FOXO1,KRT7,LAMC2,MYBL2,MYC,PLAU,POLD1,POLE2,PRIM1,RAD51AP1,RFC4,SMC2,TP53,ZWINT	CDKN1A,ERBB2,PTEN,RB1,RBL1,TP53
BRD4	kinase	1.42E-08	ACSM3,ALDH1B1,AURKB,CDC25A,DERL3,MTHFD1L,MYC,PIM2,POLE2,POLR3G,RNF125,RRS1,SLC38A5,SLC7A2,SRM,TTC27,TYRO3
CCND1	other	2.38E-08	AURKA,C11orf82,CCNE1,CDC45,CDC6,CDCA2,CDCA7,CDCA7L,CENPH,CENPK,CENPN,DTL,E2F7,FAM83D,FZD7,HJURP,KIAA0101,KIAA1524,KIF11,KIF20A,KIF20B,MELK,MTFR2,NCAPH,PAH,SPC25,STOM,TP53,TRIP13
Mek	group	3.40E-08	ABCE1,CDCA7,CDCP1,CDH1,CEBPZ,DDX21,DSCC1,ERBB2,ERBB3,GNL3,ITGA6,LYAR,MYC,NOP58,PMEL,POLR3G,PPAT,PUS7,SPRY4,UNG
CDK4	kinase	5.12E-08	AURKA,C11orf82,CDC45,CDC6,CDCA2,CDCA7,CDCA7L,CENPH,CENPK,CENPN,DTL,E2F7,FAM83D,FZD7,HJURP,KIAA0101,KIAA1524,KIF11,KIF20A,KIF20B,MELK,MTFR2,NCAPH,PAH,SPC25,STOM,TRIP13
TGFB1	growth factor	6.18E-08	BAX,BIRC5,BRIP1,BUB1,BUB1B,CCNA2,CCNB1,CCNB2,CDC20,CDC25C,CDH1,CDT1,CENPE,CKS1B,CKS2,CLDN4,ENPP1,ESPL1,FLT1,FOXO1,GLI1,HAS3,HMOX1,ITGA6,KRT7,LAMC2,MYBL2,MYC,ORC1,PDGFA,PLAU,POLD1,POLE2,PRIM1,RAD51AP1,RFC4,SFRP1,SLC39A8,SMC2,TERT,TP53,VASP,ZWINT	CDKN1A,RB1,TGFB1,TP53
TNF	cytokine	2.89E-07	A4GALT,ADM,APOBEC3B,APOE,BIRC5,BST2,CD40,CDC25C,CDH1,CHST4,CTSC,CXCL5,CYBA,DPP4,DUSP5,ELF3,F2RL1,FST,GPD2,GPR176,HMOX1,IDO1,IKBKE,IL17RB,IL4R,JARID2,LAMC2,LYN,MCM3,MFHAS1,MYC,NPM3,PDPN,PHGDH,PKMYT1,PLA2G3,PLAU,PLSCR1,PMAIP1,PPAP2A,PSMB8,RBPMS,RRM2,SDC4,SLC16A5,SLC7A1,SOCS1,TAP1,TERT,TNFSF11,TP53,TRAF2,VCL,VIPR1,ZNF267	GSK3B,P38 MAPK,SP1,STAT3,TNF,TP53
RB1	transcription regulator	3.79E-07	BAX,BIRC5,CCNA2,CCNB1,CCNE1,CDC25A,CDC6,CDH1,DDX11,FLT1,KIAA0101,LCK,MT1G,MYBL2,MYC,PLK1,RAD51,RRM2,TERT,TP53	RB1,RBL1
FOXM1	transcription regulator	1.68E-06	AURKB,BIRC5,BUB1B,CCNA2,CCNB1,CDC20,CKS1B,FOXM1,KIF20A,MYC,PLK1,PLK4	CDKN1A,FOXM1,RB1,TP53
TP63	transcription regulator	2.94E-06	ADM,BAX,BLM,BST2,CCNA2,CDC25C,CKS2,FST,HAS3,HMGA2,KIF23,LIN28A,LYN,MCM10,MYC,NANOG,PLAU,PMAIP1,RAD51,RCC1,TIPIN,TNFRSF10A,WEE1
HDAC1	transcription regulator	5.90E-06	BAX,BRCA2,CCNB1,CCNB2,CCNE1,CDC25A,CDC25C,CDC6,CDH1,COL9A1,GSTP1,MT1G,RRM2,TERT	HDAC1,MYC,RB1,RBL1,SP1,TP53
PGR	ligand-dependent nuclear receptor	8.45E-06	AK4,AMD1,CCNB2,CDC6,DDX21,EPHA1,ERBB2,EZR,FKBP5,GAL,HSD11B2,ITGA6,MATK,MYC,NQO2,PDLIM1,SMPDL3B,SRSF7,UCK2,VASP
CDKN1A	kinase	9.83E-06	BAX,BIRC5,CCNA2,CCNB1,CDC25A,CDC25C,CHEK1,EXO1,FOXM1,KIAA0101,PLK1,POLD1,TP53	CDKN1A,HDAC1,MYC,RB1,RBL1,SP1,TP53
E2F3	transcription regulator	1.30E-05	CCNA2,CDC25A,CDC6,MT1G,MYBL2,MYC,POLA1,TERT,TK1
KDM5B	transcription regulator	1.96E-05	AURKA,BUB1B,CCNB1,CYB5A,DHCR24,DLGAP5,FABP5,GAL,HMMR,MCM3,NCAPH,OIP5,PHF15,PSIP1,PTPLA,SCNN1A,SNRPD1,SWAP70,TTK
HGF	growth factor	2.18E-05	AIMP2,CD40,CDH1,DDX21,ELF3,FEN1,KIF22,KRT19,LDHA,MYC,PDGFA,PGAM1,PLAU,RARRES2,SLC9A3R1,ST14,TMEM97,TRAF2
Cg	complex	2.94E-05	BAX,BLM,CDC6,DTL,F2RL1,FST,HMGA2,ITGB5,MCM10,PLAU,PMAIP1,PODXL,SLC20A1,STC1,TIPIN,TP53,UNG,UPP1
MXI1	transcription regulator	4.26E-05	CCNB1,FOXM1,IARS,LARS,MTHFD2,SLC7A1
EIF4G1	translation regulator	1.04E-04	BIRC5,BRCA2,CHEK1,RAD51,RFC2,RFC4,TP53
RBL1	transcription regulator	1.05E-04	AURKB,CDC25A,CDC6,MT1G,MYBL2,MYC,RRM2,TERT
TRAF2	enzyme	1.24E-04	AURKA,AURKB,CCNB1,CDC25C,PLK1,WEE1
E2F2	transcription regulator	1.24E-04	CDC25A,CDC6,MT1G,MYBL2,MYC,POLA1
RBL2	other	1.43E-04	AURKB,CDC25A,CDC6,MT1G,MYBL2,MYC,RRM2,TERT
FGF7	growth factor	1.96E-04	ADSL,ADSS,APRT,CAD,HPRT1
ETV5	transcription regulator	2.53E-04	CDH1,CLDN3,CLDN4,CLDN7,FXYD5,KRT19,KRT7,TJP2,TJP3
CBX5	transcription regulator	2.54E-04	BIRC5,CDC25A,CDC6
FOXO1	transcription regulator	2.89E-04	ANLN,BIRC5,BRIP1,CCNB1,CCNB2,DEPDC1,DLGAP5,FOXO1,KIF11,MCM5,SPC25
NFYB	transcription regulator	3.40E-04	CBS,CCNB1,CCNB2,CDC25C,PTTG1
estrogen receptor	group	3.58E-04	CDH1,CDH3,CLDN3,CLDN4,CNKSR1,DSC2,DSP,ERBB2,ERBB3,F11R,FGFR4,KRT19,KRT7,KRT8,LAMC2,LYN,MYC,OCLN,PCDH1,PDGFA,PLAU,TERT,TJP3,TP53,UGT8
IgG	complex	4.42E-04	ADM,CD9,CLDN4,CTSC,DSP,EZR,FABP5,FST,IER2,MYC,PHLDA2,PIM1,PPL,PRSS8,SLC2A3,SPINT1,ST14
E2f	group	4.50E-04	CDC25C,DDX11,FANCD2,MCM10,MTHFD1,MYBL2,NASP,OIP5,RAD51,RPA3,TTK,YBX3
SLC5A8	transporter	4.82E-04	BAX,BIRC5,TNFRSF10A,TP53
E2F7	transcription regulator	4.82E-04	CCNA2,CCNB1,CDC6,KIF23
NCOA3	transcription regulator	6.15E-04	CCNE1,CDC25A,CDC6,ERBB2,HMOX1,PSMA2
GSK3B	kinase	7.08E-04	BAX,BIRC5,CDC25C,CDC6,GLI1,MYC,TP53	GSK3B,HDAC1,MYC,RB1,SP1,TP53
AR	ligand-dependent nuclear receptor	7.23E-04	CDH1,CDT1,CHTF18,DHCR24,ERBB2,FEN1,FKBP4,FKBP5,ITGA6,MCM4,MYC,PRKCD,TMPRSS2,WEE1,ZWINT	AR,ESR1
TGM2	enzyme	7.79E-04	CAD,CCDC169,CD74,CDCA7,DHX33,FERMT1,GJA1,ITGA6,MDN1,MPP6,NLN,ORC3,PARP14,PIM1,PLSCR1,RPF2,RTKN2,SAMHD1,SLC16A1,SLC7A2,SRD5A3,TAF4B,TAP1,TRIM22,TTC27
miR-483-3p (miRNAs w/seed CACUCCU)	mature microRNA	8.90E-04	ECHDC3,ERP29,GJA1,METAP1,MGME1,PGAM1,RAN,SLC7A1,SPC25
MBD2	transcription regulator	8.90E-04	APOE,CDH1,CENPH,CKS2,DPP4,GSTP1,ORC6,PLAU,PLK1
E2F8	transcription regulator	9.17E-04	CCNA2,CCNB1,CDC6,KIF23
RPL11	other	9.70E-04	HMGA2,IGF2BP1,TP53
CEL	enzyme	9.70E-04	BAX,CDH1,TP53	CEL,GSK3B,TP53
PTEN	phosphatase	1.15E-03	BAX,BIRC5,CCNB1,CCNB2,CDC25A,TP53	CDKN1A,HDAC1,MYC,PTEN,RB1,SP1,TP53
TCF4	transcription regulator	1.15E-03	BIRC5,GLI1,IGF2BP1,PLAU,TCF7L2,TERT
PTGS2	enzyme	1.19E-03	BAX,CDH1,CXCL5,ERBB2,ERBB3,EZR,FLT1,ITGA6,MYC,TP53
MAX	transcription regulator	1.29E-03	BAX,CAD,CDC25A,DKC1,MTHFD1,MYC,NCL,TERT
SUPT16H	transcription regulator	1.53E-03	DUSP5,KRT8,LYPLA1,PDGFA,PLAU,POLR3G
PAX8	transcription regulator	1.57E-03	CCNA2,CDC6,MCM3,TERT
TRIB3	kinase	1.79E-03	MTHFD2,PCK2,PMAIP1,PSAT1,STC2
IRF1	transcription regulator	2.27E-03	BRIP1,IDO1,PLA2G16,PSMB8,SOCS1,TAP1,TAP2,TRIM22
UXT	other	2.27E-03	BRIP1,BUB1,CCNA2,CDC6,CHEK1,FKBP5,TTK
CBX3	transcription regulator	2.31E-03	BIRC5,CDC25A,MYC
KDM5A	transcription regulator	2.48E-03	CD55,HMOX1,MCM3,TERT
DRAP1	transcription regulator	2.55E-03	CKS2,DLGAP5,HIST1H2BH/HIST1H2BO,HLA-DRA,MYC,SH2D3A
SSRP1	other	3.21E-03	DUSP5,KRT8,LYPLA1,PDGFA,PLAU,POLR3G
E2F6	transcription regulator	3.36E-03	CDC25A,CHEK2,DDX11,KIAA0101,MCM3,MYC,RAD51AP1
I kappa b kinase	complex	3.70E-03	BRCA2,FANCA,FANCD2,RAD51
PRKAA	group	4.02E-03	BIRC5,TP53
ENO1	enzyme	4.02E-03	ENO1,MYC
miR-16-1-3p (miRNAs w/seed CAGUAUU)	mature microRNA	4.02E-03	CHEK1,WEE1
miR-331-3p (miRNAs w/seed CCCCUGG)	mature microRNA	4.02E-03	CDCA5,KIF23
RPL15	other	4.02E-03	HMGA2,MYC
MAP3K5	kinase	4.02E-03	MSH2,TP53	MAP3K5,P38 MAPK,SP1
NF1	other	4.02E-03	CBS,GLI1
ESR1	ligand-dependent nuclear receptor	4.05E-03	BIRC5,CCNA2,CCNE1,CD55,DDX21,EIF5A,ENO1,ERBB2,FRAT2,FST,ITGA6,KCNK6,KRT19,MYC,POLA1,PRKCD,SLC39A8,SLC7A5,STC2,TERT,TMEM97,TP53
SOX4	transcription regulator	4.40E-03	BAX,BIRC5,LCK
PTGES	enzyme	4.93E-03	CDH1,ERBB3,EZR,FLT1,ITGA6,MYC
STAT3	transcription regulator	5.01E-03	CCNC,CD40,CDH1,DNMT3B,HMOX1,IKBKE,MYC,PHB,PIM1,PMAIP1,PSIP1,SALL4,STC2,TERT
HSF1	transcription regulator	5.23E-03	BAX,BST2,CDC6,CKS1B,CKS2,COBL,HMOX1,HSP90AB1,ITGB5,JARID2,KNTC1,PGAM5,POLA2
CHUK	kinase	5.60E-03	CCNB1,CDC25A,PLK1,TK1,TP53	CHUK,E2F1,TP53
EBI3	cytokine	5.60E-03	HLA-A,HLA-C,HLA-DPA1,HLA-DRA,TAP1
IFNA2	cytokine	6.55E-03	BAX,BIRC5,BST2,CYB5A,HERC5,PARP12,PLSCR1,PMAIP1,SOCS1,TP53,TRIM14,ZC3HAV1
ERN1	kinase	6.68E-03	AP1M2,CDH1,CLDN7,EPCAM,LAD1,ST14,TMPRSS2
HRAS	enzyme	7.24E-03	BIRC5,HMOX1,ITGA6,MYC,PRKCD,TNFRSF10A	ESR1,HRAS,SP1
Rb	group	7.25E-03	AURKB,HERC5,PLK1,TERT
SMARCE1	transcription regulator	7.25E-03	BRCA2,CCNB1,CENPE,MYC
EPAS1	transcription regulator	7.30E-03	ADM,EGLN3,EIF5A,ENO1,GJA1,HSPA4,SLC29A1,STC2,UGP2
THPO	cytokine	7.34E-03	AURKA,AURKB,BAX	HDAC1,MYC,RB1,SP1,THPO,TP53
TFRC	transporter	7.34E-03	CCNA2,CCNB1,CDC20
MYCBP	transcription regulator	7.34E-03	CAD,LDHA,NCL
P38 MAPK	group	7.65E-03	CCL26,CCNE1,CCNF,CD40,CD55,FST,HMOX1,MSH2,MYC,SCNN1A,TERT,TJP2,TP53,TRIB1	ESR1,P38 MAPK,SP1,STAT3,TNF
RNA polymerase II	complex	8.17E-03	CCNB1,CDH1,CHEK2,DDX11,ENO1,ERBB2,FANCI,MCM3,MYC,PKMYT1,RAD51AP1,RPL10A,TERT
SP1	transcription regulator	8.36E-03	ATP2A3,BAX,BIRC5,CBS,CDC42BPG,DBF4,EDA,EZR,FLT1,FOSL1,GJA1,HMGA1,HMOX1,HSD11B2,MSH6,MYC,PIM1,PLAU,SLC39A8,SOCS1,TERT,TP53,TRIB1	ESR1,SP1
miR-34a-5p (and other miRNAs w/seed GGCAGUG)	mature microRNA	8.65E-03	BIRC5,LIN28A,MCM10,MCM3,POU5F1,TP53
IGF1	growth factor	8.80E-03	CCNE1,ITGB5,PLAU,PSMB8,SLC20A1,TAP1,TAP2,TP53
PRKCE	kinase	8.82E-03	BIRC5,CDH1,MYC,PDGFA,PIM1	PRKCE,RB1,RBL1,STAT3
mir-27	microRNA	9.64E-03	BIRC5,CAD,FLT1,PKMYT1
ATF3	transcription regulator	9.64E-03	AURKA,AURKB,MSH2,PLK1
AZGP1	transporter	9.64E-03	CDH1,DSP,KRT19,MYC
miR-145-5p (and other miRNAs w/seed UCCAGUU)	mature microRNA	1.02E-02	ABRACL,F11R,MYC,POU5F1,SWAP70,UNG
CCNK	kinase	1.02E-02	FANCD2,FANCI,ORC3,POLA2,RFC4,TIMELESS
HDAC6	transcription regulator	1.08E-02	BIRC5,CDH1,MYC,PLAU,SRSF2
MYB	transcription regulator	1.08E-02	BIRC5,CCNB1,CDH1,MYC,POLA1
BRD7	transcription regulator	1.12E-02	KRT8,PYCARD,TRIM22
STUB1	enzyme	1.12E-02	ERBB2,RAD51,TP53
ZBTB17	transcription regulator	1.12E-02	DDB2,PMAIP1,RRM2B
AURKA	kinase	1.15E-02	CDH1,TP53
PSMC3	transcription regulator	1.15E-02	FOSL1,TP53
AP2M1	transporter	1.15E-02	BST2,CD74
LATS1	kinase	1.15E-02	BAX,CCNB1
RPL5	other	1.15E-02	HMGA2,TP53
HINT1	enzyme	1.15E-02	BAX,TP53
CCNL2	other	1.15E-02	BAX,TP53
MAP3K11	kinase	1.15E-02	BIRC5,MYC
HIF1A	transcription regulator	1.16E-02	ADM,APOE,AURKA,EGLN3,EIF5A,ENO1,GJA1,HSPA4,LDHA,MYC,NPM1,SLC29A1,STC2,TERT,TFRC,VASP
GLI1	transcription regulator	1.22E-02	CCL26,CDH1,FUCA2,IMPA2,KRT19,NQO2,PCOLCE2,PHLDA2,PPAP2C,RPS6KA1,SH2B3,TUFM
miR-124-3p (and other miRNAs w/seed AAGGCAC)	mature microRNA	1.25E-02	ACAA2,IQGAP1,SLC16A1,SUCLG2
MAPK1	kinase	1.29E-02	ARHGAP11A,BST2,CCNF,ERP29,HERC5,HLA-C,MX2,NMI,PARP12,PLSCR1,PSMB8,SAMHD1,SPRY4,TAP1,TRIM14,TRIM22,TRIM25,ZC3HAV1
MED1	transcription regulator	1.31E-02	AURKA,CDC6,CHAF1A,ERBB2,MYC
MYCN	transcription regulator	1.31E-02	HMGA1,LDHA,NCL,PHB,SLC25A19
SIRT1	transcription regulator	1.57E-02	BAX,BIRC5,CDH1,HMOX1,TP53
SPP1	cytokine	1.58E-02	AURKA,BAX,CDC20,PLAU
LIN28A	other	1.60E-02	CDC20,CDC25A,HNRNPF
E2F5	transcription regulator	1.60E-02	AURKB,MT1G,TERT
ENG	transmembrane receptor	1.60E-02	ITGA6,NTHL1,PLAU
CYP1B1	enzyme	1.60E-02	CCNE1,MCM4,RAD51
LGALS3	other	1.87E-02	CCNB2,CTSL2,ITGA6,ITPR3,KRT19,MGST1
SUZ12	enzyme	1.97E-02	CDC25A,CDH1,HNRNPM,LITAF,MYC,PLAU,RAN,SLC7A5,UCHL3,VASP
SLC29A1	transporter	1.97E-02	BAX,CCNG1,RPL10A,RRM2B
CHEK1	kinase	2.18E-02	CDC25A,MICB,RRM2
PRKAR1A	kinase	2.18E-02	ERBB2,ERBB3,RAB25
NLRC5	transcription regulator	2.18E-02	HLA-A,HLA-C,TAP1
RPL12	other	2.21E-02	HMGA2,IGF2BP1
TPT1	other	2.21E-02	BAX,TYRO3
RASSF3	other	2.21E-02	BAX,TP53
Nc2	complex	2.21E-02	HLA-A,MYC
GMNN	transcription regulator	2.21E-02	CDT1,TP53
RPS11	other	2.21E-02	HMGA2,IGF2BP1
NCL	other	2.21E-02	MYC,TP53
SMC3	other	2.21E-02	HLA-DQB1,HLA-DRA
mir-320	microRNA	2.21E-02	BIRC5,TFRC
GNB2L1	enzyme	2.21E-02	FOXM1,GLI1
PML	transcription regulator	2.21E-02	BIRC5,HLA-DRA
USP11	peptidase	2.21E-02	BAX,TP53
CLTC	other	2.21E-02	CD74,RRM2B
MAD2L1	other	2.21E-02	BAX,PTTG1
RPL35A	other	2.21E-02	HMGA2,IGF2BP1
RPS18	other	2.21E-02	HMGA2,IGF2BP1
RBCK1	transcription regulator	2.21E-02	CCNB1,MYC
FLT3	kinase	2.21E-02	MYC,PIM1
Lh	complex	2.37E-02	ACP5,ALPL,ARHGEF5,CARD10,CD55,EZR,FKBP5,GJA1,GPRC5B,ITGB5,PAWR,PMAIP1,PPAP2A,PSIP1,TK1,TP53,TRIB1,TYRO3,UPP1,VCL,YBX3
JAK2	kinase	2.41E-02	BAX,CDC25A,LYN,TP53
TERT	enzyme	2.55E-02	BAX,CCNE1,MYC,TERT,TP53
S100A6	transporter	2.55E-02	AURKA,DEPDC1,NCAPH,STC1,YBX3
miR-16-5p (and other miRNAs w/seed AGCAGCA)	mature microRNA	2.86E-02	CCNE1,CHEK1,WEE1
PLAUR	transmembrane receptor	2.86E-02	CDH1,ITGA6,PLAU
XBP1	transcription regulator	3.39E-02	ERP29,HLA-DRA,MYC,PHLDA2,TNFSF11
ITGB1	transmembrane receptor	3.45E-02	MYC,PLAU,TNFSF11,TP53
Ras	group	3.53E-02	CLDN4,TP53
Vegf	group	3.53E-02	BAX,BIRC5
KDM3A	transcription regulator	3.53E-02	ADM,HMOX1
CDK12	kinase	3.53E-02	FANCD2,FANCI
CSE1L	transporter	3.53E-02	CCNB1,RRM2B
RPS15	other	3.53E-02	HMGA2,IGF2BP1
RPS12	other	3.53E-02	HMGA2,IGF2BP1
RASSF1	other	3.53E-02	CCNA2,MYC
IGF2BP1	translation regulator	3.53E-02	GLI1,LIN28B
PLK1	kinase	3.53E-02	GMNN,PLK1
RBX1	enzyme	3.53E-02	BIRC5,CCNB1
ZEB2	transcription regulator	3.53E-02	CDH1,KRT19
PKM	kinase	3.53E-02	LDHA,MYC
MYBL2	transcription regulator	3.53E-02	BIRC5,CCNB1
VIM	other	3.53E-02	PLAU,RAB25
ATR	kinase	3.53E-02	MICB,RRM2
MS4A1	other	3.53E-02	BAX,MYC
RAD21	other	3.53E-02	HLA-DQB1,HLA-DRA
DOT1L	phosphatase	3.64E-02	NANOG,PABPC1,POU5F1
Growth hormone	group	3.64E-02	CDH1,CDH3,MYC
PNN	other	3.64E-02	CDH1,MYC,TBRG4
PTTG1	transcription regulator	3.64E-02	CCNA2,CCNB1,CDH1
IFNG	cytokine	3.68E-02	BAX,CCNA2,CD40,DPP4,ERBB2,GART,GSDMD,HLA-A,HLA-C,HLA-DQB1,HLA-DRA,IDO1,IL17RB,MX2,NFE2L3,PIM1,PLA2G16,PMAIP1,PSMB8,SLC15A3,SOCS1,TAP1,TAP2,TCF7L2,THEMIS2,TRIM22,VIPR1
NFKB1	transcription regulator	3.80E-02	ELF3,FANCD2,MYC,ORAI1,PLAU,PTPN6,TERT,TP53
NME1	kinase	3.86E-02	FBL,ICMT,METTL1,NOP58,PABPC1
IL27	cytokine	3.88E-02	HLA-A,HLA-C,HLA-DPA1,HLA-DRA,SOCS1,TAP1
NFkB (complex)	complex	3.96E-02	BAX,CCNB1,CCNB2,CD40,ELF3,ERBB2,HMOX1,LITAF,MYC,PLAU,PLK1,PRKCD,RRAS2,SDC4,SOCS1,SPIB,TAP1,TP53,TRAF2
BRCA1	transcription regulator	4.31E-02	BAX,CCNB1,CCNB2,FEN1,PLK1,TERT
STOX1	other	4.51E-02	AHCY,RPL17,SRSF7
PARP1	enzyme	4.51E-02	CDH1,ERBB2,PARP1
ZEB1	transcription regulator	4.51E-02	CDH1,KRT19,LAMC2
CAV1	transmembrane receptor	4.51E-02	OCLN,SLC2A3,TJP2
BMP4	growth factor	4.72E-02	MYC,NANOG,POU5F1,TP53
MECP2	transcription regulator	4.72E-02	APOE,CDH1,DPP4,GSTP1
KRAS	enzyme	4.77E-02	DUSP5,GLI1,MX2,TNFRSF10A,TP53,UPP1
CD24	other	4.88E-02	APOBEC3B,DEPDC1,DEPDC1B,DIAPH2,DUSP5,HMMR,KNTC1,N4BP3,PLAU,SMC4,USO1
ESR2	ligand-dependent nuclear receptor	4.92E-02	BIRC5,CDH1,GSTP1,MYC,TERT
Networks:
ID	Molecules in Network	Score	Focus Molecules	Top Functions
1	ARPC1B,ATIC,BLM,CCNB1IP1,CCNG1,CDC14B,DUT,FEN1,FKBP4,GART,KIAA0101,MELK,MSH6,PAICS,PARPBP,PERP,PFAS,PIK3R4,POLD1,PPAT,PPT1,PRIM1,RAD51,RAD54B,RAD54L,RIF1,RPA3,RPA,SLC16A1,TFAM,TMEM97,TP53,TTK,VRK1,WDHD1	37	34	Cell Cycle, DNA Replication, Recombination, and Repair, Cancer
2	CARD10,CCNB2,CDCP1,CDH3,CGN,CIRH1A,EDARADD,GNL3L,IER2,IgG,LITAF,MLKL,MYO1E,NFkB (complex),NQO2,PDCD11,PDLIM1,PIM1,PKMYT1,PPL,PRSS8,RRAS2,SDC4,SPIB,SPINT1,ST14,STEAP3,SYT6,TBC1D4,TJP2,TNFRSF11A,TNFSF11,TRIM6,TYRO3,UNC93B1	34	33	Lymphoid Tissue Structure and Development, Organ Morphology, Tissue Morphology
3	CARD11,CCNB1,CCNF,CD55,CDC6,CDC45,CDC123,CDC25A,CDCA4,CDT1,CHEK1,CLSPN,DBF4,DPP4,DTL,ERCC6L,FST,GMNN,HNRNPF,Integrin,KIF11,KIFC1,LIN28A,MICB,MMS22L,MSH2,P38 MAPK,PLK1,PSMA2,RANBP1,SCNN1A,TFAP4,TONSL,TRIB1,USP28	34	33	Cell Cycle, DNA Replication, Recombination, and Repair, Cancer
4	Alpha tubulin,ATAD3A/ATAD3B,BCAT1,CAD,CDCA7L,CHTF18,CSE1L,DDX11,DKC1,DSCC1,HERC5,HTATIP2,Importin beta,IPO5,KIF22,LDHA,MTHFD1,MYC,MYCBP,NCL,PIM2,PPP2R5A,PRDX1,PRODH,PTBP1,RAN,RCC1,RFC2,RRM2B,SGOL1,SHMT1,SHMT2,SLC25A19,TERT,WDR77	34	33	Cellular Assembly and Organization, DNA Replication, Recombination, and Repair, Amino Acid Metabolism
5	ABCE1,Ap1,CDCA7,CEBPZ,Cg,CLDN3,DSC2,DSP,estrogen receptor,EZR,FAM72D,HMGA2,ITGB5,KIAA1524,LAMC2,LYAR,MCM10,Mek,PCDH1,PLAU,PMEL,POLA1,POLR3G,PUS7,SLC12A8,SLC20A1,SPINT2,STC1,TIMELESS,TIPIN,TJP3,TUBA4A,UGT8,UNG,UPP1	30	31	Cancer, Endocrine System Disorders, Reproductive System Disease
6	26s Proteasome,APC (complex),AURKA,AURKB,BUB1,BUB1B,CCNA2,CDC20,CENPE,CKS1B,CNKSR1,Cyclin E,ERP29,FANCA,FOXM1,GJA1,GSTP1,Jnk,KIF20A,KRT8,KRT19,LTBR,MAD2L2,N-cor,NMI,NPM1,PLK4,TACC3,TCF7L2,TFRC,TNFRSF8,TNFRSF10A,TRAF2,WEE1,ZC3H12A	28	30	Cell Cycle, Cellular Growth and Proliferation, Tissue Morphology
7	BAX,BIRC5,calpain,CCNE1,CD40,CD74,CHEK2,CTSZ,Gm-csf,HLA-C,HLA-DQB1,Hsp70,HSPA4,IFN Beta,IL12 (complex),IL4R,Immunoglobulin,MCM4,MT-ND2,OCLN,ORC1,ORC3,ORC6,PABPC1,PMAIP1,PNP,POLE2,POLE,PYCARD,RPL10A,SLC29A1,SOCS1,TAP1,TAP2,XRCC5	26	29	Hematological System Development and Function, Tissue Morphology, DNA Replication, Recombination, and Repair
8	Akt,C1QBP,CD9,CDH1,CIDEB,CYBA,Cyclin B,CYCS,EIF4EBP1,EPCAM,ESPL1,F11R,FXYD5,G-protein beta,GALNT3,GPR143,GPSM3,HMGA1,HSP90AB1,Igm,ITGA6,LLGL2,LPAR3,PI3K (family),PIK3R2,PLCB2,PLSCR1,PODXL,PP2A,PRKCD,PTTG1,RPSA,Shc,SLC9A3R1,TCF7L1	25	28	Cellular Movement, Cell Morphology, Hair and Skin Development and Function
9	14-3-3,A4GALT,AIM1,ALPL,ANLN,ARHGEF5,BRIP1,c-Src,CXCL5,DEPDC1,DLGAP5,FKBP5,FOXO1,FSH,GPR64,GPRC5B,HMOX1,IDO1,IKBKE,Interferon alpha,LECT1,Lh,MCM3,MCM5,NFE2L3,PPAP2A,PSIP1,SLC1A5,SOD3,SPC24,SPC25,TCF,TEK,Vegf,ZWINT	25	28	Cancer, Reproductive System Disease, Gastrointestinal Disease
10	ATP1A1,CCL26,CD4,CDC25C,CLDN4,DDX54,ELF3,ERBB2,ERBB3,ERK1/2,FGF19,FGFR4,FLT1,Focal adhesion kinase,GRB7,HLA-DR,HMMR,HNRNPM,Hsp90,HTR7,ICMT,KRT7,LYN,MATK,MYBL2,p85 (pik3r),PPAP2C,Rac,RAD51AP1,Ras,ROR1,SPRY4,SRC (family),TDGF1,VRK2	23	27	Cancer, Reproductive System Disease, Cell Signaling
11	ASF1B,BCR (complex),caspase,CHAF1A,CHAF1B,Cyclin A,DDB2,FBL,GAL,GGT1,H2AFZ,Histone h3,Histone h4,LIG1,MAP2K1/2,MRPS9,MT1G,NCAPG2,NCAPH,PARP1,PARP,PDGFA,PHB,PNO1,Rb,RCC2,RRM2,SFRP1,SMC2,SMC4,STOM,STXBP2,SUV39H1,TSR1,VAMP8	23	27	DNA Replication, Recombination, and Repair, Cellular Assembly and Organization, Gene Expression
12	CCNE2,CCNK,CHTF18,CKS2,COX7C,DDX11,E2F3,E2F4,FAM60A,FEN1,GINS1,H2AFX,KIAA0101,MRTO4,MSH2,NOP10,NUDT15,PCNA,PIPOX,POLA2,POLD1,PSAT1,RBL1,RBL2,RFC2,RFC3,RFC4,SMN1/SMN2,SNRPB,ST6GAL1,TEAD4,TERT,UMPS,VSNL1,ZNF217	19	24	DNA Replication, Recombination, and Repair, Cell Cycle, Organ Morphology
13	ADM,AKAP1,CD3,CDCA5,Creb,ERK,F Actin,FOSL1,G3BP1,HAS3,HSPD1,IQGAP1,LCK,Lfa-1,Mapk,MST4,ORAI1,PI3K (complex),Pka,Pkc(s),PLCB3,PLCG2,PRKAC,PTPN6,PTRH2,Rap1,RPS6KA1,RYR1,SIT1,SORL1,TCR,THY1,TRAIP,VASP,VCL	17	23	Cell Signaling, Molecular Transport, Vitamin and Mineral Metabolism
14	ATP8B1,C19orf33,C1orf112,CENPI,ERMP1,FAM111B,FAM83G,LARS2,LRRC16A,NUPR1,POLQ,RAB17,RCL1,SPAG5,STIL,TMEM194A,TMEM30B	15	15	Gastrointestinal Disease, Hepatic System Disease, Liver Cholestasis
15	ACSL5,ACSM3,ALDH1B1,BRD4,DERL3,DHX33,FKBP11,GFPT2,INHBE,MTHFD1L,NIP7,NPM1,POLR1A,RNF125,Rnr,RPS10,RPS26,RRS1,SBDS,SLC38A5,SRM,WDR12	13	16	RNA Post-Transcriptional Modification, Developmental Disorder, Hematological Disease
16	BRD4,CCDC169,CCNA2,CDC20,E4F1,ERG,FERMT1,Jnk,LATS1,MAPK1,MDN1,MPP6,NLN,NUPR1,PARP14,PPP2CA,RASSF1,RB1,RELA,RPF2,RTKN2,SAMHD1,SAV1,SERPINB2,SLC7A2,SRD5A3,STK3,TAF4B,TGM2,TICRR,TIMM13,TIMM8A,TRIM22,TTC27,TUBB2A	12	19	Cell Cycle, Cancer, Cellular Development
17	C11orf82,CCND1,CDCA2,CDK4,CDKN1A,CDKN1B,CDKN2A,CENPH,CENPK,CENPN,CHUK,E2F1,E2F4,FAM83D,FHOD1,FZD7,GRB2,HJURP,HSPA9,KIF20B,MTFR2,MYBBP1A,NUPR1,PAH,TK1,VIL1	11	16	Cell Cycle, Connective Tissue Development and Function, Cancer
18	Actin,ADSL,ADSS,AIMP1,AIMP2,APOC1,APRT,CD2AP,ECHDC3,EEF1E1,EGFR,Endophilin,EPS8L2,ERG,FGF7,GAK,Hdac,HGF,INPPL1,KARS,METAP1,miR-483-3p (miRNAs w/seed CACUCCU),MMP25,NPAS1,PFN1,PGAM1,RARRES2,RARS,RASIP1,RPL8,SLC7A1,TACC1,THBS4,WIPF1,XPO6	11	18	Hair and Skin Development and Function, Organ Morphology, Cellular Function and Maintenance
19	AGTRAP,CLRN1,CST1,CST2,DCP2,DIAPH1,DNMT3B,ESRP2,ETS1,EXOSC2,EXOSC4,EXOSC5,EXOSC10,FAM46B,FLT4,HLA-DPB1,HS2ST1,IGF2BP3,ITGB1,KHSRP,MAGEA3/MAGEA6,MGST1,MRPL9,PRKCA,PTPRN2,RPP25,SALL3,SCAMP1,SEC23IP,SLC39A14,SLC3A2,SLC7A5,SLC7A8,SZRD1,TNF	11	18	Amino Acid Metabolism, Molecular Transport, Small Molecule Biochemistry
20	ACSL3,ADAM9,APP,AUP1,B2M,CASP3,CCL20,CXCL10,CYCS,DHCR24,EBI3,HLA-A,HLA-C,HLA-DPA1,HSF1,HSPB1,IgG,IL27,ITGA6,LDHB,LPCAT1,POP7,RAB34,SEL1L,SLC27A3,SLC39A10,SLC43A3,SLC6A6,SLCO4A1,SYVN1,TIMM23B,TLR3,TOMM40,VCP,ZC3HAV1	10	17	Cell Death and Survival, Dermatological Diseases and Conditions, Immunological Disease
21	ABRACL,AREG/AREGB,CCL18,CD86,CD274,CTNNAL1,CTSC,CXCL1,CXCL5,CXCR7,EGLN3,EIF3B,EIF3E,EPAS1,GPX3,IARS,IDO1,IL13,KANK1,miR-145-5p (and other miRNAs w/seed UCCAGUU),MLF1IP,MUC1,NCLN,PHLDA1,PLCXD1,PLD1,RIN2,SLC26A6,SPRY2,SWAP70,THBS1,TMC6,TREM1,UGP2,WNT5A	10	17	Cellular Movement, Immune Cell Trafficking, Hematological System Development and Function
22	BUB3,CCNB1,CYB5A,E2F7,E2F8,ECT2,FBXO5,FH,HACL1,HNF1A,KDM5B,KIF14,KIF23,KIF2C,LATS1,MT1X,NDC80,NDNL2,NSMCE1,NSMCE2,NSMCE4A,PHF15,PLK1,PRC1,PTPLA,PTTG1,RACGAP1,SMC5,SMC6,SUMO1,TARS,TERF1,TKT,TRIP13,WEE1	10	17	Cell Cycle, Cellular Assembly and Organization, DNA Replication, Recombination, and Repair
23	ALYREF,APOE,BUB1,CETP,Ck2,CSE1L,CSTF1,CTSD,DDX39A,DEK,HYOU1,LDL,METTL1,MREG,NME1,NOP58,NUP37,NUP85,NUP98,NUP107,NUP133,NUP160,Pp2b,PRDX6,RAE1,RANBP2,SARNP,SCYL1,SIX4,STRAP,TCOF1,THOC6,TP53,TPR,ZNF552/ZNF587B	10	17	Molecular Transport, RNA Trafficking, Organismal Development
24	ADM,AKT3,ALG6,ALG8,ARHGAP11A,BLM,CARD8,CPVL,ELL2,EXO1,FZD8,GABRA5,GDF15,HNRNPA2B1,HSPA2,IFIT2,ITPR3,KLF4,LBR,LMNB1,MGME1,MMD,MX2,NME1,NUPR1,OAS1,PRELID1,PROM1,RELB,SRSF1,STX3,TCR,TNS3,XRCC2,ZC3HAV1	9	16	Developmental Disorder, Hereditary Disorder, Metabolic Disease
25	BNIP2,CCND1,CLDN1,CLDN7,CTNNB1,CTSL2,EPHA4,FADS3,FGFR1,GCNT1,GRINA,HIPK2,HTR1A,IGFBP5,IL8,LGALS3,LGR4,M6PR,MGEA5,MLEC,MLPH,MRPS15,MUC1,PHGDH,PLA2G16,PRDX4,PTPRC,RAB27A,RB1,SIGIRR,SMARCA4,SPDEF,TNF,TP53	8	15	Cellular Development, Cellular Growth and Proliferation, Hematological System Development and Function
Molecules:
Symbol	Entrez Gene Name	GenBank/Gene symbol -- human (Hugo / HGNC, Entrez Gene)	Networks	Location	Type(s)	Biomarker Application(s)	Drug(s)	Entrez Gene ID for Human	Entrez Gene ID for Mouse	Entrez Gene ID for Rat
14-3-3	--	--	9	Cytoplasm	group	unspecified application
26s Proteasome	--	--	6	Cytoplasm	complex
A4GALT	alpha 1,4-galactosyltransferase	A4GALT	9	Cytoplasm	enzyme			53947	239559	63888
AASS	aminoadipate-semialdehyde synthase	AASS		Cytoplasm	enzyme			10157	30956	296925
ABCE1	ATP-binding cassette, sub-family E (OABP), member 1	ABCE1	5	Cytoplasm	transporter			6059	24015	361390
ABRACL	ABRA C-terminal like	ABRACL	21	unknown	other			58527	73112	685045
ACAA2	acetyl-CoA acyltransferase 2	ACAA2		Cytoplasm	enzyme	unspecified application		10449	52538	170465
ACAP1	ArfGAP with coiled-coil, ankyrin repeat and PH domains 1	ACAP1		Plasma Membrane	other			9744	216859
ACP5	acid phosphatase 5, tartrate resistant	ACP5		Cytoplasm	phosphatase	disease progression,efficacy,unspecified application		54	11433
ACSL3	acyl-CoA synthetase long-chain family member 3	--	20	Cytoplasm	enzyme			2181	74205	114024
ACSL5	acyl-CoA synthetase long-chain family member 5	--	15	Cytoplasm	enzyme			51703	433256	94340
ACSM3	acyl-CoA synthetase medium-chain family member 3	ACSM3	15	Cytoplasm	enzyme			6296	20216	24763
ACTC1	actin, alpha, cardiac muscle 1	ACTC1		Cytoplasm	enzyme			70	11464	29275
Actin	--	--	18	Cytoplasm	group	response to therapy
ACY1	aminoacylase 1	ACY1		Cytoplasm	peptidase	unspecified application		95	109652	300981
ADAM9	ADAM metallopeptidase domain 9	--	20	Plasma Membrane	peptidase	efficacy,prognosis		8754	11502	290834
ADAMTS8	ADAM metallopeptidase with thrombospondin type 1 motif, 8	ADAMTS8		Extracellular Space	peptidase			11095	30806
ADAMTS19	ADAM metallopeptidase with thrombospondin type 1 motif, 19	ADAMTS19		Extracellular Space	peptidase			171019	240322
ADCK3	aarF domain containing kinase 3	ADCK3		Cytoplasm	kinase			56997	67426	360887
ADCY2	adenylate cyclase 2 (brain)	ADCY2		Plasma Membrane	enzyme			108	210044	81636
ADM	adrenomedullin	ADM	13,24	Extracellular Space	other	prognosis,unspecified application		133	11535	25026
ADSL	adenylosuccinate lyase	ADSL	18	Cytoplasm	enzyme			158	11564	315150
ADSS	adenylosuccinate synthase	ADSS	18	Cytoplasm	enzyme			159	11566	289276
AEN	apoptosis enhancing nuclease	AEN		Nucleus	enzyme			64782	68048	361594
AGPAT5	1-acylglycerol-3-phosphate O-acyltransferase 5	AGPAT5		Cytoplasm	enzyme			55326	52123	306582
AGTRAP	angiotensin II receptor-associated protein	AGTRAP	19	Plasma Membrane	G-protein coupled receptor			57085	11610	298646
AHCY	adenosylhomocysteinase	AHCY		Cytoplasm	enzyme	unspecified application	9-(2',3'-dihydroxycyclopent-4'-enyl)adenine, 3-deazaneplanocin, neplanocin A, 3-deazaaristeromycin, cyanovirin-N, 6'-C-methylneplanocin A	191	269378	29443
AIM1	absent in melanoma 1	AIM1	9	Extracellular Space	other	diagnosis,disease progression,prognosis		202	11630	309866
AIMP1	aminoacyl tRNA synthetase complex-interacting multifunctional protein 1	--	18	Extracellular Space	cytokine	diagnosis		9255	13722	114632
AIMP2	aminoacyl tRNA synthetase complex-interacting multifunctional protein 2	AIMP2	18	Plasma Membrane	other			7965	231872	288480
AK4	adenylate kinase 4	AK4		Cytoplasm	kinase			205	11639	29223
AKAP1	A kinase (PRKA) anchor protein 1	AKAP1	13	Cytoplasm	other			8165	11640	114124
AKT3	v-akt murine thymoma viral oncogene homolog 3 (protein kinase B, gamma)	--	24	Cytoplasm	kinase	disease progression,efficacy	enzastaurin	10000	23797	29414
Akt	--	--	8	Cytoplasm	group	diagnosis,disease progression,efficacy,prognosis,response to therapy,safety
ALDH16A1	aldehyde dehydrogenase 16 family, member A1	ALDH16A1		unknown	enzyme			126133	69748	361571
ALDH1B1	aldehyde dehydrogenase 1 family, member B1	ALDH1B1	15	Cytoplasm	enzyme			219	72535	298079
ALG1	ALG1, chitobiosyldiphosphodolichol beta-mannosyltransferase	ALG1		Cytoplasm	enzyme			56052	208211	360475
ALG3	ALG3, alpha-1,3- mannosyltransferase	ALG3		Cytoplasm	enzyme			10195	208624	287983
ALG6	ALG6, alpha-1,3-glucosyltransferase	ALG6	24	Cytoplasm	enzyme			29929	320438	362547
ALG8	ALG8, alpha-1,3-glucosyltransferase	ALG8	24	Cytoplasm	enzyme			79053	381903	293129
Alpha tubulin	--	--	4	Cytoplasm	group
ALPL	alkaline phosphatase, liver/bone/kidney	ALPL	9	Plasma Membrane	phosphatase	efficacy,safety		249	11647	25586
ALYREF	Aly/REF export factor	ALYREF	23	Nucleus	transcription regulator			10189	21681
AMD1	adenosylmethionine decarboxylase 1	AMD1		Cytoplasm	enzyme			262	100041585|11702	81640
AMPD3	adenosine monophosphate deaminase 3	AMPD3		Cytoplasm	enzyme			272	11717	25095
ANAPC1	anaphase promoting complex subunit 1	ANAPC1		Nucleus	other			64682	17222	311412
ANKRD24	ankyrin repeat domain 24	ANKRD24		unknown	other			170961	70615	299639
ANLN	anillin, actin binding protein	ANLN	9	Cytoplasm	other	prognosis		54443	68743	363031
ANO1	anoctamin 1, calcium activated chloride channel	ANO1		Plasma Membrane	ion channel			55107	101772	309135
Ap1	--	--	5	Nucleus	complex
AP1M2	adaptor-related protein complex 1, mu 2 subunit	AP1M2		Cytoplasm	transporter			10053	11768	367038
AP1S2	adaptor-related protein complex 1, sigma 2 subunit	AP1S2		Cytoplasm	transporter			8905	108012	302671
AP2M1	adaptor-related protein complex 2, mu 1 subunit	--		Cytoplasm	transporter			1173	11773	116563
APC (complex)	--	--	6	Cytoplasm	complex
APOBEC3B	apolipoprotein B mRNA editing enzyme, catalytic polypeptide-like 3B	APOBEC3B		Cytoplasm	enzyme			9582	80287	315137
APOBEC3C	apolipoprotein B mRNA editing enzyme, catalytic polypeptide-like 3C	APOBEC3C		unknown	enzyme			27350
APOC1	apolipoprotein C-I	APOC1	18	Extracellular Space	transporter	prognosis,unspecified application		341	11812	25292
APOE	apolipoprotein E	APOE	23	Extracellular Space	transporter	diagnosis,efficacy,prognosis,unspecified application		348	11816	25728
APP	amyloid beta (A4) precursor protein	--	20	Plasma Membrane	other	diagnosis,efficacy,unspecified application	bapineuzumab, 4-(2-(6-(2-(2-(2-fluoroethoxy)ethoxy)ethoxy)pyridin-3-yl)vinyl)-N-methylbenzamide	351	11820
APRT	adenine phosphoribosyltransferase	APRT	18	Cytoplasm	enzyme			353	11821	292072
AR	androgen receptor	--		Nucleus	ligand-dependent nuclear receptor	diagnosis,disease progression,efficacy,prognosis	estradiol valerate/testosterone enanthate, estradiol cypionate/testosterone cypionate, BMS-641988, enzalutamide, 1-testosterone, nilutamide, bicalutamide, flutamide, nandrolone decanoate, testosterone cypionate, cyproterone acetate, drospirenone, medroxyprogesterone acetate, oxandrolone, danazol, dihydrotestosterone, fluoxymesterone, stanozolol, spironolactone, methyltestosterone, testosterone, o…	367	11835	24208
AREG/AREGB	amphiregulin	--	21	Extracellular Space	growth factor	diagnosis,efficacy,prognosis,response to therapy		727738|374	11839	29183
ARHGAP4	Rho GTPase activating protein 4	ARHGAP4		Cytoplasm	other			393	171207	246249
ARHGAP11A	Rho GTPase activating protein 11A	ARHGAP11A	24	Cytoplasm	other			9824	228482	296060
ARHGAP8/PRR5-ARHGAP8	Rho GTPase activating protein 8	ARHGAP8		Cytoplasm	other			23779|553158	73167	300115
ARHGEF5	Rho guanine nucleotide exchange factor (GEF) 5	ARHGEF5	9	Cytoplasm	other			7984	54324	140898
ARHGEF10	Rho guanine nucleotide exchange factor (GEF) 10	ARHGEF10		Cytoplasm	enzyme			9639	234094
ARHGEF16	Rho guanine nucleotide exchange factor (GEF) 16	ARHGEF16		Cytoplasm	other			27237	230972
ARHGEF19	Rho guanine nucleotide exchange factor (GEF) 19	ARHGEF19		unknown	other			128272	213649	362648
ARL2	ADP-ribosylation factor-like 2	ARL2		Cytoplasm	enzyme			402	56327	65142
ARPC1B	actin related protein 2/3 complex, subunit 1B, 41kDa	ARPC1B	1	Cytoplasm	other			10095	11867	54227
ARTN	artemin	ARTN		Extracellular Space	growth factor			9048	11876	362572
ASF1B	ASF1 anti-silencing function 1 homolog B (S. cerevisiae)	ASF1B	11	Nucleus	other			55723	66929	304648
ATAD3A/ATAD3B	ATPase family, AAA domain containing 3A	ATAD3B	4	Nucleus	other			83858|55210	108888	298682
ATF3	activating transcription factor 3	--		Nucleus	transcription regulator	unspecified application		467	11910	25389
ATIC	5-aminoimidazole-4-carboxamide ribonucleotide formyltransferase/IMP cyclohydrolase	ATIC	1	Cytoplasm	enzyme		LY231514	471	108147	81643
ATP1A1	ATPase, Na+/K+ transporting, alpha 1 polypeptide	ATP1A1	10	Plasma Membrane	transporter		digoxin, omeprazole, trichloromethiazide, ethacrynic acid, bretylium, perphenazine, ouabain, digitoxin	476	11928	24211
ATP2A3	ATPase, Ca++ transporting, ubiquitous	ATP2A3		Cytoplasm	transporter			489	53313	25391
ATP8B1	ATPase, aminophospholipid transporter, class I, type 8B, member 1	--	14	Plasma Membrane	transporter			5205	54670	291555
ATR	ataxia telangiectasia and Rad3 related	--		Nucleus	kinase			545	245000
AUP1	ancient ubiquitous protein 1	--	20	Cytoplasm	other			550	11993	680423
AURKA	aurora kinase A	AURKA	6	Nucleus	kinase	diagnosis,efficacy,prognosis	tozasertib, MLN8054	6790	20878	261730
AURKB	aurora kinase B	AURKB	6	Nucleus	kinase	diagnosis	AZD-1152, tozasertib, GSK1070916	9212	20877	114592
AZGP1	alpha-2-glycoprotein 1, zinc-binding	--		Extracellular Space	transporter			563	12007	25294
B2M	beta-2-microglobulin	--	20	Plasma Membrane	transmembrane receptor	disease progression,efficacy,response to therapy,safety,unspecified application		567	12010	24223
BAX	BCL2-associated X protein	BAX	7	Cytoplasm	transporter	disease progression,efficacy,prognosis,unspecified application		581	12028	24887
BCAT1	branched chain amino-acid transaminase 1, cytosolic	BCAT1	4	Cytoplasm	enzyme			586	12035	29592
BCR (complex)	--	--	11	Plasma Membrane	complex
BEND4	BEN domain containing 4	BEND4		unknown	other			389206	666938	681008
BIRC5	baculoviral IAP repeat containing 5	BIRC5	7	Cytoplasm	other	diagnosis,disease progression,efficacy,prognosis,response to therapy		332	11799
BLM	Bloom syndrome, RecQ helicase-like	BLM	1,24	Nucleus	enzyme			641	12144	308755
BMP4	bone morphogenetic protein 4	--		Extracellular Space	growth factor			652	12159	25296
BNIP2	BCL2/adenovirus E1B 19kDa interacting protein 2	--	25	Cytoplasm	other			663	12175	300811
BRCA1	breast cancer 1, early onset	--		Nucleus	transcription regulator	diagnosis,disease progression,efficacy,prognosis,response to therapy		672	12189	497672
BRCA2	breast cancer 2, early onset	BRCA2		Nucleus	transcription regulator	diagnosis,disease progression,efficacy,prognosis,response to therapy		675	12190	360254
BRD4	bromodomain containing 4	--	15,16	Nucleus	kinase			23476	57261	362844
BRD7	bromodomain containing 7	--		Nucleus	transcription regulator			29117	26992
BRIP1	BRCA1 interacting protein C-terminal helicase 1	BRIP1	9	Nucleus	enzyme			83990	237911	360588
BST2	bone marrow stromal cell antigen 2	BST2		Plasma Membrane	other			684	69550	378947
BUB1	BUB1 mitotic checkpoint serine/threonine kinase	BUB1	6,23	Nucleus	kinase	diagnosis		699	12235	296137
BUB3	BUB3 mitotic checkpoint protein	--	22	Nucleus	other			9184	12237	361662
BUB1B	BUB1 mitotic checkpoint serine/threonine kinase B	BUB1B	6	Nucleus	kinase			701	12236	171576
c-Src	--	--	9	Cytoplasm	group
C10orf82	chromosome 10 open reading frame 82	C10orf82		unknown	other			143379	67507	681006
C11orf48	chromosome 11 open reading frame 48	C11orf48		unknown	other			79081
C11orf82	chromosome 11 open reading frame 82	C11orf82	17	Cytoplasm	other			220042	74041	499204
C18orf54	chromosome 18 open reading frame 54	C18orf54		Extracellular Space	other			162681		361346
C19orf33	chromosome 19 open reading frame 33	C19orf33	14	Nucleus	other			64073	72275	100361913
C1orf94	chromosome 1 open reading frame 94	C1orf94		Extracellular Space	other			84970	635169
C1orf112	chromosome 1 open reading frame 112	C1orf112	14	unknown	other			55732	381306	498265
C1QBP	complement component 1, q subcomponent binding protein	C1QBP	8	Cytoplasm	transcription regulator			708	12261	29681
C6orf211	chromosome 6 open reading frame 211	C6orf211		unknown	other			79624	73419	292267
C9orf64	chromosome 9 open reading frame 64	C9orf64		unknown	other			84267	70153	361201
CABLES1	Cdk5 and Abl enzyme substrate 1	CABLES1		Nucleus	other			91768	63955	307585
CAD	carbamoyl-phosphate synthetase 2, aspartate transcarbamylase, and dihydroorotase	CAD	4	Cytoplasm	enzyme			790	69719	24240
calpain	--	--	7	Cytoplasm	complex
CAMTA1	calmodulin binding transcription activator 1	CAMTA1		unknown	other			23261	100072	362665
CARD8	caspase recruitment domain family, member 8	--	24	Nucleus	other			22900
CARD10	caspase recruitment domain family, member 10	CARD10	2	Cytoplasm	other			29775	105844	315120
CARD11	caspase recruitment domain family, member 11	CARD11	3	Cytoplasm	kinase			84433	108723	100363332
CASP3	caspase 3, apoptosis-related cysteine peptidase	--	20	Cytoplasm	peptidase	diagnosis,disease progression,efficacy,prognosis,unspecified application	IDN-6556	836	12367	25402
caspase	--	--	11	Cytoplasm	group	efficacy
CAV1	caveolin 1, caveolae protein, 22kDa	--		Plasma Membrane	transmembrane receptor	diagnosis		857	12389	25404
CBLC	Cbl proto-oncogene, E3 ubiquitin protein ligase C	CBLC		Nucleus	enzyme	unspecified application		23624	80794	292699
CBR1	carbonyl reductase 1	CBR1		Cytoplasm	enzyme	response to therapy		873	12408	29224|100360507
CBS	cystathionine-beta-synthase	CBS		Cytoplasm	enzyme		pyridoxine	875	12411	24250
CBX3	chromobox homolog 3	--		Nucleus	transcription regulator			11335		100360260
CBX5	chromobox homolog 5	--		Nucleus	transcription regulator			23468	12419	300266
CCDC150	coiled-coil domain containing 150	CCDC150		unknown	other			284992	78016	316399
CCDC169	coiled-coil domain containing 169	CCDC169	16	unknown	other			728591	320604	499618
CCKBR	cholecystokinin B receptor	CCKBR		Plasma Membrane	G-protein coupled receptor		CR 2945, pentagastrin	887	12426	25706
CCL18	chemokine (C-C motif) ligand 18 (pulmonary and activation-regulated)	--	21	Extracellular Space	cytokine	efficacy,safety		6362
CCL20	chemokine (C-C motif) ligand 20	--	20	Extracellular Space	cytokine			6364	20297	29538
CCL26	chemokine (C-C motif) ligand 26	CCL26	10	Extracellular Space	cytokine			10344
CCNA2	cyclin A2	CCNA2	6,16	Nucleus	other	efficacy,prognosis		890	12428	114494
CCNB1	cyclin B1	CCNB1	3,22	Cytoplasm	kinase	diagnosis,disease progression,efficacy,prognosis		891		25203
CCNB2	cyclin B2	CCNB2	2	Cytoplasm	other			9133	12442	363088
CCNB1IP1	cyclin B1 interacting protein 1, E3 ubiquitin protein ligase	CCNB1IP1	1	Nucleus	enzyme			57820	239083	498492
CCNC	cyclin C	CCNC		Nucleus	other			892	51813	114839
CCND1	cyclin D1	--	17,25	Nucleus	other	diagnosis,efficacy,prognosis,response to therapy,unspecified application	arsenic trioxide	595	12443	58919
CCNE1	cyclin E1	CCNE1	7	Nucleus	transcription regulator			898	12447	25729
CCNE2	cyclin E2	--	12	Nucleus	other	response to therapy		9134	12448	362485
CCNF	cyclin F	CCNF	3	Nucleus	other			899	12449	117524
CCNG1	cyclin G1	CCNG1	1	Nucleus	other			900	12450	25405
CCNJL	cyclin J-like	CCNJL		unknown	other			79616
CCNK	cyclin K	--	12	Nucleus	kinase			8812	12454	500715
CCNL2	cyclin L2	--		Nucleus	other			81669	56036
CCT5	chaperonin containing TCP1, subunit 5 (epsilon)	CCT5		Cytoplasm	other			22948	12465	294864
CD3	--	--	13	Plasma Membrane	complex	efficacy
CD4	CD4 molecule	CD4	10	Plasma Membrane	transmembrane receptor	diagnosis,efficacy		920	12504	24932
CD9	CD9 molecule	CD9	8	Plasma Membrane	other	efficacy		928	12527	24936
CD24	CD24 molecule	--		Plasma Membrane	other	diagnosis,disease progression,efficacy,prognosis,unspecified application		100133941
CD40	CD40 molecule, TNF receptor superfamily member 5	CD40	7	Plasma Membrane	transmembrane receptor	efficacy,unspecified application	SGN-40 (anti-huCD40 mAb)	958	21939	171369
CD55	CD55 molecule, decay accelerating factor for complement (Cromer blood group)	CD55	3	Plasma Membrane	other	prognosis		1604		64036
CD74	CD74 molecule, major histocompatibility complex, class II invariant chain	CD74	7	Plasma Membrane	transmembrane receptor			972	16149	25599
CD86	CD86 molecule	--	21	Plasma Membrane	transmembrane receptor	efficacy,prognosis	abatacept, belatacept	942	12524	56822
CD274	CD274 molecule	--	21	Plasma Membrane	enzyme	disease progression,efficacy		29126	60533	499342
CD2AP	CD2-associated protein	CD2AP	18	Cytoplasm	other			23607	12488	316258
CD3EAP	CD3e molecule, epsilon associated protein	CD3EAP		Nucleus	other			10849	70333	680493
CDC6	cell division cycle 6	CDC6	3	Nucleus	other			990	23834	360621
CDC20	cell division cycle 20	CDC20	6,16	Nucleus	other			991	107995	64515
CDC45	cell division cycle 45	CDC45	3	Nucleus	other			8318	12544	287961
CDC123	cell division cycle 123	CDC123	3	Cytoplasm	other			8872	98828	116656
CDC14B	cell division cycle 14B	CDC14B	1	Nucleus	phosphatase			8555	218294	361195
CDC25A	cell division cycle 25A	CDC25A	3	Nucleus	phosphatase	prognosis		993	12530	171102
CDC25C	cell division cycle 25C	CDC25C	10	Nucleus	phosphatase	efficacy		995	12532	307511
CDC42BPG	CDC42 binding protein kinase gamma (DMPK-like)	CDC42BPG		Cytoplasm	kinase			55561	240505	293693
CDCA2	cell division cycle associated 2	CDCA2	17	Nucleus	other			157313	108912	305984
CDCA4	cell division cycle associated 4	CDCA4	3	Nucleus	other			55038	71963	500727
CDCA5	cell division cycle associated 5	CDCA5	13	Cytoplasm	other			113130	67849	684771
CDCA7	cell division cycle associated 7	CDCA7	5	Nucleus	other			83879
CDCA7L	cell division cycle associated 7-like	CDCA7L	4	Nucleus	other			55536	217946	619566
CDCP1	CUB domain containing protein 1	CDCP1	2	Plasma Membrane	other			64866	109332	301082
CDH1	cadherin 1, type 1, E-cadherin (epithelial)	CDH1	8	Plasma Membrane	other	diagnosis,disease progression,efficacy,prognosis		999	12550	83502
CDH3	cadherin 3, type 1, P-cadherin (placental)	CDH3	2	Plasma Membrane	other	diagnosis,efficacy,prognosis		1001	12560	116777
CDK4	cyclin-dependent kinase 4	--	17	Nucleus	kinase	diagnosis,prognosis	PD-0332991, flavopiridol	1019	12567
CDK12	cyclin-dependent kinase 12	--		Nucleus	kinase			51755	69131	192350
CDK18	cyclin-dependent kinase 18	CDK18		Cytoplasm	kinase			5129	18557	289019
CDKN1A	cyclin-dependent kinase inhibitor 1A (p21, Cip1)	--	17	Nucleus	kinase	diagnosis,efficacy,prognosis,response to therapy		1026	12575	114851
CDKN1B	cyclin-dependent kinase inhibitor 1B (p27, Kip1)	--	17	Nucleus	kinase	diagnosis,disease progression,efficacy,prognosis,response to therapy		1027	12576	83571
CDKN2A	cyclin-dependent kinase inhibitor 2A	--	17	Nucleus	transcription regulator	diagnosis,disease progression,efficacy,prognosis,response to therapy,safety		1029	12578	25163
CDS1	CDP-diacylglycerol synthase (phosphatidate cytidylyltransferase) 1	CDS1		Cytoplasm	enzyme			1040	74596	81925
CDT1	chromatin licensing and DNA replication factor 1	CDT1	3	Nucleus	other			81620	67177	292071
CDYL	chromodomain protein, Y-like	CDYL		Nucleus	transcription regulator			9425	12593	361237
CEBPZ	CCAAT/enhancer binding protein (C/EBP), zeta	CEBPZ	5	Nucleus	other			10153	12607	362686
CECR2	cat eye syndrome chromosome region, candidate 2	CECR2		Nucleus	other			27443	330409	500308
CEL	carboxyl ester lipase	--		Extracellular Space	enzyme			1056	12613	24254
CENPE	centromere protein E, 312kDa	CENPE	6	Nucleus	other			1062	229841	362044
CENPH	centromere protein H	CENPH	17	Nucleus	other			64946	26886	681185
CENPI	centromere protein I	CENPI	14	Nucleus	other			2491	102920	25448
CENPK	centromere protein K	CENPK	17	Nucleus	other			64105	60411	294712
CENPN	centromere protein N	CENPN	17	unknown	other			55839	72155	361416
CENPW	centromere protein W	CENPW		Nucleus	other			387103	66311	689399|681382
CETP	cholesteryl ester transfer protein, plasma	--	23	Extracellular Space	enzyme	efficacy	torcetrapib	1071
Cg	--	--	5	unknown	complex	diagnosis,prognosis
CGN	cingulin	CGN	2	Plasma Membrane	other			57530	70737	310655
CGNL1	cingulin-like 1	CGNL1		Plasma Membrane	other			84952	68178	315795
CHAF1A	chromatin assembly factor 1, subunit A (p150)	CHAF1A	11	Nucleus	other			10036	27221	363333
CHAF1B	chromatin assembly factor 1, subunit B (p60)	CHAF1B	11	Nucleus	other	unspecified application		8208	110749	288242
CHDH	choline dehydrogenase	CHDH		Cytoplasm	enzyme			55349	218865	290551
CHEK1	checkpoint kinase 1	CHEK1	3	Nucleus	kinase	diagnosis,efficacy	UCN-01	1111	12649	140583
CHEK2	checkpoint kinase 2	CHEK2	7	Nucleus	kinase	response to therapy		11200	50883	114212
CHRDL1	chordin-like 1	CHRDL1		Extracellular Space	other			91851	83453	363455
CHST4	carbohydrate (N-acetylglucosamine 6-O) sulfotransferase 4	CHST4		Cytoplasm	enzyme			10164	26887	307838
CHST6	carbohydrate (N-acetylglucosamine 6-O) sulfotransferase 6	CHST6		Cytoplasm	enzyme			4166	56773	307859
CHST9	carbohydrate (N-acetylgalactosamine 4-0) sulfotransferase 9	CHST9		Cytoplasm	enzyme			83539	71367	291770
CHTF18	CTF18, chromosome transmission fidelity factor 18 homolog (S. cerevisiae)	CHTF18	4,12	unknown	other			63922	214901	287146
CHUK	conserved helix-loop-helix ubiquitous kinase	--	17	Cytoplasm	kinase	prognosis	methyl 2-cyano-3,12-dioxoolean-1,9-dien-28-oate	1147	12675	309361
CIDEB	cell death-inducing DFFA-like effector b	CIDEB	8	Cytoplasm	other			27141	12684	364388
CIRH1A	cirrhosis, autosomal recessive 1A (cirhin)	CIRH1A	2	Nucleus	other			84916	21771	291987
Ck2	--	--	23	Cytoplasm	complex
CKMT1A/CKMT1B	creatine kinase, mitochondrial 1B	CKMT1B		Cytoplasm	kinase			1159|548596
CKS2	CDC28 protein kinase regulatory subunit 2	CKS2	12	unknown	kinase			1164	66197	498709
CKS1B	CDC28 protein kinase regulatory subunit 1B	CKS1B	6	unknown	kinase			1163	54124	499655
CLDN1	claudin 1	--	25	Plasma Membrane	other	prognosis		9076	12737	65129
CLDN3	claudin 3	CLDN3	5	Plasma Membrane	transmembrane receptor	diagnosis,unspecified application		1365	12739	65130
CLDN4	claudin 4	CLDN4	10	Plasma Membrane	transmembrane receptor	diagnosis,efficacy,prognosis		1364	12740	304407
CLDN6	claudin 6	CLDN6		Plasma Membrane	other			9074	54419	287098
CLDN7	claudin 7	CLDN7	25	Plasma Membrane	other	unspecified application		1366	53624	65132
CLDN10	claudin 10	CLDN10		Plasma Membrane	other			9071	58187	290485
CLRN1	clarin 1	--	19	Plasma Membrane	other			7401	229320	261738
CLSPN	claspin	CLSPN	3	Nucleus	other			63967	269582	298534
CLTC	clathrin, heavy chain (Hc)	--		Plasma Membrane	other			1213	67300	54241
CNDP2	CNDP dipeptidase 2 (metallopeptidase M20 family)	CNDP2		Cytoplasm	peptidase			55748	66054	291394
CNKSR1	connector enhancer of kinase suppressor of Ras 1	CNKSR1	6	Cytoplasm	other			10256	194231	298545
COBL	cordon-bleu WH2 repeat protein	COBL		Plasma Membrane	other			23242	12808	305497
COL9A1	collagen, type IX, alpha 1	COL9A1		Extracellular Space	other		collagenase clostridium histolyticum	1297	12839	305104
CORO2A	coronin, actin binding protein, 2A	CORO2A		Cytoplasm	other			7464	107684	313235
COX5A	cytochrome c oxidase subunit Va	COX5A		Cytoplasm	enzyme			9377	12858	252934
COX7C	cytochrome c oxidase subunit VIIc	COX7C	12	Cytoplasm	enzyme			1350	12867	100188937
CPNE7	copine VII	CPNE7		unknown	transporter			27132	102278	361433
CPVL	carboxypeptidase, vitellogenic-like	CPVL	24	unknown	peptidase			54504	71287	502774
CRB3	crumbs homolog 3 (Drosophila)	CRB3		Plasma Membrane	other			92359	224912	301112
Creb	--	--	13	Nucleus	group
CSE1L	CSE1 chromosome segregation 1-like (yeast)	CSE1L	4,23	Nucleus	transporter			1434	110750	362273
CST1	cystatin SN	--	19	unknown	other			1469
CST2	cystatin SA	--	19	Extracellular Space	other			1470
CSTF1	cleavage stimulation factor, 3' pre-RNA, subunit 1, 50kDa	--	23	Nucleus	other			1477	67337	311670
CTNNAL1	catenin (cadherin-associated protein), alpha-like 1	CTNNAL1	21	Plasma Membrane	other			8727	54366	298019
CTNNB1	catenin (cadherin-associated protein), beta 1, 88kDa	--	25	Nucleus	transcription regulator	diagnosis,disease progression,efficacy,prognosis		1499	12387	84353
CTSC	cathepsin C	CTSC	21	Cytoplasm	peptidase	unspecified application		1075	13032	25423
CTSD	cathepsin D	--	23	Cytoplasm	peptidase	diagnosis,unspecified application		1509	13033	171293
CTSL2	cathepsin L2	CTSL2	25	Cytoplasm	peptidase			1515	13039	25697
CTSZ	cathepsin Z	CTSZ	7	Cytoplasm	peptidase			1522	64138
CUZD1	CUB and zona pellucida-like domains 1	CUZD1		Plasma Membrane	other			50624	16433	117179
CXCL1	chemokine (C-X-C motif) ligand 1 (melanoma growth stimulating activity, alpha)	--	21	Extracellular Space	cytokine	disease progression		2919	330122	171551
CXCL5	chemokine (C-X-C motif) ligand 5	CXCL5	9,21	Extracellular Space	cytokine			6374
CXCL10	chemokine (C-X-C motif) ligand 10	--	20	Extracellular Space	cytokine	diagnosis,efficacy,prognosis,unspecified application	MDX-1100	3627	15945	245920
CXCR7	chemokine (C-X-C motif) receptor 7	--	21	Plasma Membrane	G-protein coupled receptor	diagnosis,disease progression		57007	12778	84348
CYB5A	cytochrome b5 type A (microsomal)	CYB5A	22	Cytoplasm	enzyme			1528	109672	64001
CYBA	cytochrome b-245, alpha polypeptide	CYBA	8	Cytoplasm	enzyme			1535	13057	79129
Cyclin A	--	--	11	Nucleus	group	prognosis,unspecified application
Cyclin B	--	--	8	Cytoplasm	group	efficacy
Cyclin E	--	--	6	Nucleus	group	disease progression,efficacy,prognosis,unspecified application
CYCS	cytochrome c, somatic	CYCS	8,20	Cytoplasm	transporter			54205		679794
CYP1B1	cytochrome P450, family 1, subfamily B, polypeptide 1	--		Cytoplasm	enzyme	diagnosis,efficacy,prognosis,unspecified application		1545	13078	25426
CYP2S1	cytochrome P450, family 2, subfamily S, polypeptide 1	CYP2S1		Cytoplasm	enzyme			29785	74134	308445
CYYR1	cysteine/tyrosine-rich 1	CYYR1		unknown	other			116159	224405	304138
DARS2	aspartyl-tRNA synthetase 2, mitochondrial	DARS2		Cytoplasm	enzyme			55157	226539	304919
DAZL	deleted in azoospermia-like	DAZL		Cytoplasm	translation regulator			1618
DBF4	DBF4 homolog (S. cerevisiae)	DBF4	3	Nucleus	kinase			10926	27214	312046
DBI	diazepam binding inhibitor (GABA receptor modulator, acyl-CoA binding protein)	DBI		Cytoplasm	other			1622	13167	25045
DCP2	DCP2 decapping enzyme homolog (S. cerevisiae)	DCP2	19	Nucleus	enzyme			167227	70640	291604
DDB2	damage-specific DNA binding protein 2, 48kDa	DDB2	11	Nucleus	other			1643	107986	100362121
DDT	D-dopachrome tautomerase	DDT		Cytoplasm	enzyme			1652	13202	29318
DDX11	DEAD/H (Asp-Glu-Ala-Asp/His) box helicase 11	DDX11	4,12	Cytoplasm	enzyme			1663	320209	316767
DDX21	DEAD (Asp-Glu-Ala-Asp) box helicase 21	DDX21		Nucleus	enzyme			9188	56200	317399
DDX54	DEAD (Asp-Glu-Ala-Asp) box polypeptide 54	DDX54	10	Nucleus	transcription regulator			79039	71990	360815
DDX39A	DEAD (Asp-Glu-Ala-Asp) box polypeptide 39A	--	23	Nucleus	enzyme			10212	68278	89827
DEK	DEK oncogene	DEK	23	Nucleus	transcription regulator			7913	110052	306817
DEPDC1	DEP domain containing 1	DEPDC1	9	Nucleus	transcription regulator	diagnosis		55635	76131	295538
DEPDC1B	DEP domain containing 1B	DEPDC1B		Cytoplasm	other			55789	218581	310074
DERL3	derlin 3	DERL3	15	Cytoplasm	other			91319	70377	690315
DESI2	desumoylating isopeptidase 2	DESI2		unknown	other			51029	78825	289277
DHCR24	24-dehydrocholesterol reductase	DHCR24	20	Cytoplasm	enzyme			1718	74754	298298
DHX33	DEAH (Asp-Glu-Ala-His) box polypeptide 33	DHX33	15	Nucleus	enzyme			56919	216877	287464
DHX37	DEAH (Asp-Glu-Ala-His) box polypeptide 37	DHX37		unknown	enzyme			57647	208144	288647
DIAPH1	diaphanous homolog 1 (Drosophila)	DIAPH1	19	Plasma Membrane	other			1729	13367	307483
DIAPH2	diaphanous homolog 2 (Drosophila)	DIAPH2		Cytoplasm	other			1730	54004	317189
DIAPH3	diaphanous homolog 3 (Drosophila)	DIAPH3		Cytoplasm	enzyme			81624	56419	290396
DKC1	dyskeratosis congenita 1, dyskerin	DKC1	4	Nucleus	enzyme			1736	245474
DLGAP5	discs, large (Drosophila) homolog-associated protein 5	DLGAP5	9	Nucleus	phosphatase			9787	218977	289997
DMC1	DMC1 dosage suppressor of mck1 homolog, meiosis-specific homologous recombination (yeast)	DMC1		Nucleus	enzyme			11144	13404	362960
DNA2	DNA replication helicase 2 homolog (yeast)	DNA2		Cytoplasm	enzyme			1763	327762	309762
DNAJA4	DnaJ (Hsp40) homolog, subfamily A, member 4	DNAJA4		Nucleus	other	safety		55466	58233	300721
DNAJC2	DnaJ (Hsp40) homolog, subfamily C, member 2	DNAJC2		Nucleus	other			27000	22791	116456
DNMT3B	DNA (cytosine-5-)-methyltransferase 3 beta	DNMT3B	19	Nucleus	enzyme			1789	13436	444985
DOT1L	DOT1-like, histone H3 methyltransferase (S. cerevisiae)	--		Nucleus	phosphatase			84444	208266	362831
DPEP3	dipeptidase 3	DPEP3		unknown	peptidase			64180	71854	364994
DPP4	dipeptidyl-peptidase 4	DPP4	3	Plasma Membrane	peptidase	prognosis	saxagliptin, talabostat, SYR-322, sitagliptin, vildagliptin, linagliptin, metformin/saxagliptin, simvastatin/sitagliptin, metformin/sitagliptin, linagliptin/metformin, alogliptin/pioglitazone	1803	13482	25253
DRAP1	DR1-associated protein 1 (negative cofactor 2 alpha)	--		Nucleus	transcription regulator			10589	66556	293674
DSC2	desmocollin 2	DSC2	5	Plasma Membrane	other	unspecified application		1824	13506	291760
DSCC1	defective in sister chromatid cohesion 1 homolog (S. cerevisiae)	DSCC1	4	Nucleus	other			79075	72107	299933
DSG2	desmoglein 2	DSG2		Plasma Membrane	other			1829	13511	307562
DSP	desmoplakin	DSP	5	Plasma Membrane	other			1832	109620	306871
DTL	denticleless E3 ubiquitin protein ligase homolog (Drosophila)	DTL	3	Nucleus	other			51514	76843	305073
DUS3L	dihydrouridine synthase 3-like (S. cerevisiae)	DUS3L		unknown	other			56931	224907	301122
DUSP5	dual specificity phosphatase 5	DUSP5		Nucleus	phosphatase			1847	240672	171109
DUSP23	dual specificity phosphatase 23	DUSP23		Cytoplasm	phosphatase			54935	68440	360881
DUT	deoxyuridine triphosphatase	DUT	1	Nucleus	enzyme	response to therapy		1854	110074	497778
DYSF	dysferlin, limb girdle muscular dystrophy 2B (autosomal recessive)	DYSF		Plasma Membrane	other			8291	26903	312492
E2F1	E2F transcription factor 1	--	17	Nucleus	transcription regulator	disease progression,prognosis		1869	13555	399489
E2F2	E2F transcription factor 2	--		Nucleus	transcription regulator			1870	242705
E2F3	E2F transcription factor 3	--	12	Nucleus	transcription regulator	diagnosis,efficacy,unspecified application		1871	13557	291105
E2F4	E2F transcription factor 4, p107/p130-binding	--	12,17	Nucleus	transcription regulator			1874	104394	100360427
E2F5	E2F transcription factor 5, p130-binding	--		Nucleus	transcription regulator			1875	13559	116651
E2F6	E2F transcription factor 6	--		Nucleus	transcription regulator			1876	50496	313978
E2F7	E2F transcription factor 7	E2F7	22	Nucleus	transcription regulator			144455	52679	314818
E2F8	E2F transcription factor 8	E2F8	22	Nucleus	transcription regulator			79733	108961	308607
E2f	--	--		Nucleus	group
E4F1	E4F transcription factor 1	--	16	Nucleus	transcription regulator			1877	13560	681359
EARS2	glutamyl-tRNA synthetase 2, mitochondrial	EARS2		Cytoplasm	enzyme			124454	67417	361641
EBI3	Epstein-Barr virus induced 3	--	20	Extracellular Space	cytokine			10148	50498	680609
EBPL	emopamil binding protein-like	EBPL		Cytoplasm	enzyme			84650	68177	361054
ECHDC3	enoyl CoA hydratase domain containing 3	ECHDC3	18	Cytoplasm	enzyme			79746	67856
ECT2	epithelial cell transforming sequence 2 oncogene	--	22	Cytoplasm	other	disease progression		1894	13605
EDA	ectodysplasin A	EDA		Extracellular Space	cytokine			1896	13607	302424
EDARADD	EDAR-associated death domain	EDARADD	2	Cytoplasm	other			128178	171211	498769
EEF1E1	eukaryotic translation elongation factor 1 epsilon 1	EEF1E1	18	Cytoplasm	translation regulator			9521	66143	291057
EGFR	epidermal growth factor receptor	--	18	Plasma Membrane	kinase	diagnosis,disease progression,efficacy,prognosis,response to therapy,safety,unspecified application	cetuximab, AEE 788, panitumumab, BMS-599626, ARRY-334543, XL647, canertinib, gefitinib, HKI-272, PD 153035, lapatinib, vandetanib, erlotinib	1956	13649	24329
EGLN3	egl nine homolog 3 (C. elegans)	EGLN3	21	Cytoplasm	enzyme			112399	112407	54702
EHD4	EH-domain containing 4	EHD4		Plasma Membrane	enzyme			30844	98878	192204
EIF2S3	eukaryotic translation initiation factor 2, subunit 3 gamma, 52kDa	EIF2S3		Cytoplasm	translation regulator			1968	26908	100312984
EIF3B	eukaryotic translation initiation factor 3, subunit B	EIF3B	21	Cytoplasm	translation regulator			8662	27979	288516
EIF3E	eukaryotic translation initiation factor 3, subunit E	--	21	Cytoplasm	translation regulator			3646	16341	299872
EIF4EBP1	eukaryotic translation initiation factor 4E binding protein 1	EIF4EBP1	8	Cytoplasm	translation regulator	efficacy,prognosis		1978	13685	116636
EIF4G1	eukaryotic translation initiation factor 4 gamma, 1	--		Cytoplasm	translation regulator			1981	208643	287986
EIF5A	eukaryotic translation initiation factor 5A	EIF5A		Cytoplasm	translation regulator			1984	276770	287444
ELAC2	elaC homolog 2 (E. coli)	ELAC2		Nucleus	enzyme			60528	68626	282826
ELF3	E74-like factor 3 (ets domain transcription factor, epithelial-specific )	ELF3	10	Nucleus	transcription regulator			1999	13710	304815
ELL2	elongation factor, RNA polymerase II, 2	--	24	Nucleus	transcription regulator			22936	192657	309918
ELOVL6	ELOVL fatty acid elongase 6	ELOVL6		Cytoplasm	enzyme			79071	170439	171402
Endophilin	--	--	18	Cytoplasm	group
ENG	endoglin	--		Plasma Membrane	transmembrane receptor	diagnosis,disease progression,efficacy,prognosis		2022	13805
ENO1	enolase 1, (alpha)	ENO1		Cytoplasm	enzyme	diagnosis		2023	13806|433182	24333
ENPP1	ectonucleotide pyrophosphatase/phosphodiesterase 1	ENPP1		Plasma Membrane	enzyme			5167	18605	85496
EPAS1	endothelial PAS domain protein 1	--	21	Nucleus	transcription regulator	disease progression,prognosis		2034	13819	29452
EPCAM	epithelial cell adhesion molecule	EPCAM	8	Plasma Membrane	other	unspecified application	tucotuzumab celmoleukin, catumaxomab, adecatumumab	4072	17075	171577
EPHA1	EPH receptor A1	EPHA1		Plasma Membrane	kinase			2041	13835	312279
EPHA4	EPH receptor A4	--	25	Plasma Membrane	kinase	disease progression		2043	13838	316539
EPS8L2	EPS8-like 2	EPS8L2	18	unknown	other			64787	98845	361674
ERBB2	v-erb-b2 erythroblastic leukemia viral oncogene homolog 2, neuro/glioblastoma derived oncogene homolog (avian)	ERBB2	10	Plasma Membrane	kinase	diagnosis,disease progression,efficacy,prognosis,response to therapy,safety	trastuzumab, BMS-599626, ARRY-334543, XL647, CP-724,714, pertuzumab, trastuzumab emtansine, HKI-272, lapatinib, erlotinib	2064	13866	24337
ERBB3	v-erb-b2 erythroblastic leukemia viral oncogene homolog 3 (avian)	ERBB3	10	Plasma Membrane	kinase	diagnosis,efficacy,prognosis,safety		2065	13867	29496
ERCC6L	excision repair cross-complementing rodent repair deficiency, complementation group 6-like	ERCC6L	3	Nucleus	other			54821	236930	317252
ERG	v-ets erythroblastosis virus E26 oncogene homolog (avian)	--	16,18	Nucleus	transcription regulator	diagnosis,disease progression,prognosis		2078	13876	170909
ERK	--	--	13	unknown	group	efficacy
ERK1/2	--	--	10	Cytoplasm	group
ERMP1	endoplasmic reticulum metallopeptidase 1	ERMP1	14	Cytoplasm	other			79956	226090	373544
ERN1	endoplasmic reticulum to nucleus signaling 1	--		Cytoplasm	kinase			2081	78943	498013
ERP29	endoplasmic reticulum protein 29	ERP29	6	Cytoplasm	transporter			10961	67397	117030
ESCO2	establishment of cohesion 1 homolog 2 (S. cerevisiae)	ESCO2		Nucleus	other			157570	71988	691979
ESPL1	extra spindle pole bodies homolog 1 (S. cerevisiae)	ESPL1	8	Nucleus	peptidase			9700	105988	315330
ESR1	estrogen receptor 1	--		Nucleus	ligand-dependent nuclear receptor	diagnosis,disease progression,efficacy,prognosis,response to therapy	17-alpha-ethinylestradiol, fulvestrant, beta-estradiol, estradiol 17beta-cypionate, estriol, estrone, estradiol valerate, mestranol, 3-(4-methoxy)phenyl-4-((4-(2-(1-piperidinyl)ethoxy)phenyl)methyl)-2H-1-benzopyran-7-ol, bazedoxifene, estradiol valerate/testosterone enanthate, TAS-108, ethynodiol diacetate, ethinyl estradiol/ethynodiol diacetate, estradiol acetate, esterified estrogens, estradiol…	2099	13982	24890
ESR2	estrogen receptor 2 (ER beta)	--		Nucleus	ligand-dependent nuclear receptor	diagnosis,efficacy,prognosis,response to therapy	17-alpha-ethinylestradiol, fulvestrant, beta-estradiol, estradiol 17beta-cypionate, estrone, estradiol valerate, 3-(4-methoxy)phenyl-4-((4-(2-(1-piperidinyl)ethoxy)phenyl)methyl)-2H-1-benzopyran-7-ol, bazedoxifene, estradiol valerate/testosterone enanthate, TAS-108, ethinyl estradiol/ethynodiol diacetate, estradiol acetate, esterified estrogens, estradiol cypionate/medroxyprogesterone acetate, co…	2100	13983	25149
ESRP1	epithelial splicing regulatory protein 1	ESRP1		Nucleus	other			54845	207920	500409
ESRP2	epithelial splicing regulatory protein 2	ESRP2	19	Nucleus	other			80004	77411	307810
estrogen receptor	--	--	5	unknown	group	diagnosis,disease progression,efficacy,prognosis,response to therapy
ESYT3	extended synaptotagmin-like protein 3	ESYT3		unknown	other			83850	272636	363120
ETS1	v-ets erythroblastosis virus E26 oncogene homolog 1 (avian)	--	19	Nucleus	transcription regulator	unspecified application		2113	23871	24356
ETV4	ets variant 4	ETV4		Nucleus	transcription regulator	unspecified application		2118	18612	360635
ETV5	ets variant 5	--		Nucleus	transcription regulator			2119	104156	303828
EXO1	exonuclease 1	EXO1	24	Nucleus	enzyme	diagnosis		9156	26909	305000
EXOSC2	exosome component 2	EXOSC2	19	Nucleus	enzyme			23404	227715	366017
EXOSC4	exosome component 4	--	19	Nucleus	enzyme			54512	109075	300045
EXOSC5	exosome component 5	EXOSC5	19	Nucleus	enzyme			56915	27998	308441
EXOSC10	exosome component 10	--	19	Nucleus	kinase			5394	50912
EZR	ezrin	EZR	5	Plasma Membrane	other	prognosis		7430	22350	54319
F Actin	--	--	13	Cytoplasm	complex	unspecified application
F11R	F11 receptor	F11R	8	Plasma Membrane	other	unspecified application		50848	16456	116479
F2RL1	coagulation factor II (thrombin) receptor-like 1	F2RL1		Plasma Membrane	G-protein coupled receptor			2150	14063	116677
FABP5	fatty acid binding protein 5 (psoriasis-associated)	FABP5		Cytoplasm	transporter	disease progression		2171	16592
FADS3	fatty acid desaturase 3	FADS3	25	Plasma Membrane	enzyme			3995	60527	286922
FAM111B	family with sequence similarity 111, member B	FAM111B	14	unknown	other			374393
FAM124A	family with sequence similarity 124A	FAM124A		unknown	other			220108	629059	691938
FAM136A	family with sequence similarity 136, member A	FAM136A		unknown	other	prognosis		84908
FAM174B	family with sequence similarity 174, member B	FAM174B		unknown	other			400451	100038347	681398
FAM46B	family with sequence similarity 46, member B	FAM46B	19	unknown	other			115572	100342	313019
FAM60A	family with sequence similarity 60, member A	FAM60A	12	Extracellular Space	other			58516	56306
FAM72D	family with sequence similarity 72, member D	FAM72D	5	Nucleus	other			728833
FAM83D	family with sequence similarity 83, member D	FAM83D	17	unknown	other			81610	71878	311598
FAM83G	family with sequence similarity 83, member G	FAM83G	14	unknown	other			644815	69640	100360307
FAM83H	family with sequence similarity 83, member H	FAM83H		unknown	other			286077	105732	362937
FANCA	Fanconi anemia, complementation group A	FANCA	6	Nucleus	other	efficacy,safety		2175	14087	361435
FANCB	Fanconi anemia, complementation group B	FANCB		Nucleus	other			2187	237211	501552
FANCD2	Fanconi anemia, complementation group D2	FANCD2		Nucleus	other	efficacy,prognosis		2177	211651	312641
FANCI	Fanconi anemia, complementation group I	FANCI		Nucleus	other			55215	208836	100360594
FBL	fibrillarin	FBL	11	Nucleus	other			2091	14113	292747
FBXO5	F-box protein 5	--	22	Nucleus	enzyme			26271	67141	292263
FEN1	flap structure-specific endonuclease 1	FEN1	1,12	Nucleus	enzyme			2237	14156	84490
FERMT1	fermitin family member 1	FERMT1	16	Plasma Membrane	other			55612	241639	296179
FGF7	fibroblast growth factor 7	--	18	Extracellular Space	growth factor	efficacy		2252	14178	29348
FGF19	fibroblast growth factor 19	FGF19	10	Extracellular Space	growth factor			9965	14170	170582
FGFR1	fibroblast growth factor receptor 1	--	25	Plasma Membrane	kinase	diagnosis,prognosis,unspecified application	pazopanib, regorafenib	2260	14182	79114
FGFR4	fibroblast growth factor receptor 4	FGFR4	10	Plasma Membrane	kinase	unspecified application		2264	14186	25114
FH	fumarate hydratase	--	22	Cytoplasm	enzyme			2271	14194	24368
FHDC1	FH2 domain containing 1	FHDC1		unknown	other			85462	229474	295161
FHOD1	formin homology 2 domain containing 1	FHOD1	17	Nucleus	other			29109	234686	291964
FKBP4	FK506 binding protein 4, 59kDa	FKBP4	1	Nucleus	enzyme			2288	14228	260321
FKBP5	FK506 binding protein 5	FKBP5	9	Nucleus	enzyme			2289	14229	361810
FKBP11	FK506 binding protein 11, 19 kDa	--	15	Cytoplasm	enzyme			51303	66120	300211
FLAD1	flavin adenine dinucleotide synthetase 1	FLAD1		Cytoplasm	enzyme			80308	319945	751787
FLT1	fms-related tyrosine kinase 1	FLT1	10	Plasma Membrane	kinase	diagnosis,disease progression,efficacy,prognosis,response to therapy,safety	sunitinib, pazopanib, axitinib, CEP 7055, XL184, regorafenib, vandetanib	2321	14254	54251
FLT3	fms-related tyrosine kinase 3	--		Plasma Membrane	kinase	diagnosis,efficacy,prognosis	dovitinib, tandutinib, XL184, ponatinib, sorafenib, lestaurtinib, CGP 41251	2322	14255	140635
FLT4	fms-related tyrosine kinase 4	FLT4	19	Plasma Membrane	transmembrane receptor	diagnosis,disease progression,efficacy,prognosis	sunitinib, pazopanib, axitinib, CEP 7055, tivozanib, telatinib, XL184, regorafenib, sorafenib, vandetanib	2324	14257	114110
Focal adhesion kinase	--	--	10	Cytoplasm	group
FOSL1	FOS-like antigen 1	FOSL1	13	Nucleus	transcription regulator	prognosis		8061	14283	25445
FOXA3	forkhead box A3	FOXA3		Nucleus	transcription regulator	unspecified application		3171	15377	25100
FOXH1	forkhead box H1	FOXH1		Nucleus	transcription regulator			8928	14106	300054
FOXM1	forkhead box M1	FOXM1	6	Nucleus	transcription regulator	prognosis		2305	14235	58921
FOXO1	forkhead box O1	FOXO1	9	Nucleus	transcription regulator	prognosis		2308	56458	84482
FRAT2	frequently rearranged in advanced T-cell lymphomas 2	FRAT2		Cytoplasm	other			23401	212398
FSH	--	--	9	Plasma Membrane	complex
FST	follistatin	FST	3	Extracellular Space	other			10468	14313	24373
FUCA2	fucosidase, alpha-L- 2, plasma	FUCA2		Extracellular Space	enzyme			2519	66848	292485
FXYD5	FXYD domain containing ion transport regulator 5	FXYD5	8	Plasma Membrane	ion channel			53827	18301	60338
FZD5	frizzled family receptor 5	FZD5		Plasma Membrane	G-protein coupled receptor	diagnosis		7855	14367	317674
FZD7	frizzled family receptor 7	FZD7	17	Plasma Membrane	G-protein coupled receptor	disease progression		8324	14369	100360552
FZD8	frizzled family receptor 8	--	24	Plasma Membrane	G-protein coupled receptor			8325	14370	364754
G-protein beta	--	--	8	Cytoplasm	group
G3BP1	GTPase activating protein (SH3 domain) binding protein 1	G3BP1	13	Nucleus	enzyme			10146	27041	171092
GABRA5	gamma-aminobutyric acid (GABA) A receptor, alpha 5	GABRA5	24	Plasma Membrane	ion channel		methohexital, primidone, meprobamate, aspirin/butalbital/caffeine, aspirin/butalbital/caffeine/codeine, hexobarbital, pagoclone, alphadolone, SEP 174559, zopiclone, clobazam, nitrazepam, adinazolam, butobarbital, acetaminophen/butalbital/caffeine, sevoflurane, isoflurane, gaboxadol, isoniazid, felbamate, etomidate, muscimol, halothane, fluoxetine/olanzapine, amobarbital, estazolam, atropine/hyosc…	2558	110886	29707
GAK	cyclin G associated kinase	--	18	Nucleus	kinase			2580	231580	81659
GAL	galanin/GMAP prepropeptide	GAL	11	Extracellular Space	other			51083	14419	29141
GALNT3	UDP-N-acetyl-alpha-D-galactosamine:polypeptide N-acetylgalactosaminyltransferase 3 (GalNAc-T3)	GALNT3	8	Cytoplasm	enzyme	disease progression		2591	14425	366061
GALNT7	UDP-N-acetyl-alpha-D-galactosamine:polypeptide N-acetylgalactosaminyltransferase 7 (GalNAc-T7)	GALNT7		Cytoplasm	enzyme			51809	108150	29750
GALNT12	UDP-N-acetyl-alpha-D-galactosamine:polypeptide N-acetylgalactosaminyltransferase 12 (GalNAc-T12)	GALNT12		Cytoplasm	enzyme			79695	230145	313233
GART	phosphoribosylglycinamide formyltransferase, phosphoribosylglycinamide synthetase, phosphoribosylaminoimidazole synthetase	GART	1	Cytoplasm	enzyme	prognosis,safety	LY231514	2618	14450	288259
GCDH	glutaryl-CoA dehydrogenase	GCDH		Cytoplasm	enzyme			2639	270076	364975
GCNT1	glucosaminyl (N-acetyl) transferase 1, core 2	GCNT1	25	Cytoplasm	enzyme			2650	14537	64043
GDA	guanine deaminase	GDA		Cytoplasm	enzyme			9615	14544	83585
GDF3	growth differentiation factor 3	GDF3		Extracellular Space	growth factor			9573	14562	500311
GDF15	growth differentiation factor 15	--	24	Extracellular Space	growth factor	diagnosis		9518	23886	29455
GDPD2	glycerophosphodiester phosphodiesterase domain containing 2	GDPD2		Plasma Membrane	enzyme			54857	71584	302421
GEN1	Gen endonuclease homolog 1 (Drosophila)	GEN1		unknown	enzyme			348654	209334	298884
GFPT2	glutamine-fructose-6-phosphate transaminase 2	GFPT2	15	Cytoplasm	enzyme			9945	14584	360518
GGCT	gamma-glutamylcyclotransferase	GGCT		Cytoplasm	enzyme			79017	110175	362368
GGT1	gamma-glutamyltransferase 1	GGT1	11	Plasma Membrane	enzyme	diagnosis,efficacy,safety,unspecified application		2678	14598
GINS1	GINS complex subunit 1 (Psf1 homolog)	GINS1	12	Nucleus	other			9837	69270	499914
GINS2	GINS complex subunit 2 (Psf2 homolog)	GINS2		Nucleus	other			51659	272551	292058
GJA1	gap junction protein, alpha 1, 43kDa	GJA1	6	Plasma Membrane	transporter	disease progression		2697	14609	24392
GLB1L3	galactosidase, beta 1-like 3	GLB1L3		unknown	enzyme			112937	70893	500961
GLDC	glycine dehydrogenase (decarboxylating)	GLDC		Cytoplasm	enzyme			2731	104174	309312
GLI1	GLI family zinc finger 1	GLI1		Nucleus	transcription regulator	efficacy		2735	14632	140589
GLYATL1	glycine-N-acyltransferase-like 1	GLYATL1		unknown	other			92292
Gm-csf	--	--	7	unknown	group
GMNN	geminin, DNA replication inhibitor	GMNN	3	Nucleus	transcription regulator	unspecified application		51053	57441	291137
GNB2L1	guanine nucleotide binding protein (G protein), beta polypeptide 2-like 1	--		Cytoplasm	enzyme			10399	14694	83427
GNL3	guanine nucleotide binding protein-like 3 (nucleolar)	GNL3		Nucleus	other			26354	30877	290556
GNL3L	guanine nucleotide binding protein-like 3 (nucleolar)-like	GNL3L	2	Nucleus	other			54552	237107	100034253
GNPNAT1	glucosamine-phosphate N-acetyltransferase 1	GNPNAT1		Cytoplasm	enzyme			64841	54342	498486
GPATCH4	G patch domain containing 4	GPATCH4		unknown	other			54865	66614	295228
GPD2	glycerol-3-phosphate dehydrogenase 2 (mitochondrial)	GPD2		Cytoplasm	enzyme			2820	14571	25062
GPR64	G protein-coupled receptor 64	GPR64	9	Plasma Membrane	G-protein coupled receptor			10149	237175	266735
GPR143	G protein-coupled receptor 143	GPR143	8	Plasma Membrane	G-protein coupled receptor			4935	18241	302619
GPR176	G protein-coupled receptor 176	GPR176		Plasma Membrane	G-protein coupled receptor			11245	381413	117257
GPRC5B	G protein-coupled receptor, family C, group 5, member B	GPRC5B	9	Plasma Membrane	G-protein coupled receptor			51704	64297	293546
GPSM3	G-protein signaling modulator 3	GPSM3	8	Cytoplasm	other			63940	106512	406163
GPX3	glutathione peroxidase 3 (plasma)	GPX3	21	Extracellular Space	enzyme	diagnosis,unspecified application		2878	14778	64317
GRB2	growth factor receptor-bound protein 2	--	17	Cytoplasm	other			2885	14784	81504
GRB7	growth factor receptor-bound protein 7	GRB7	10	Plasma Membrane	other	prognosis		2886	14786	84427
GRHL2	grainyhead-like 2 (Drosophila)	GRHL2		Nucleus	transcription regulator			79977	252973	299979
GRINA	glutamate receptor, ionotropic, N-methyl D-aspartate-associated protein 1 (glutamate binding)	--	25	unknown	ion channel			2907	66168	266668
GRM4	glutamate receptor, metabotropic 4	GRM4		Plasma Membrane	G-protein coupled receptor		fasoracetam	2914	268934	24417
Growth hormone	--	--		Extracellular Space	group	diagnosis,efficacy
GRPR	gastrin-releasing peptide receptor	GRPR		Plasma Membrane	G-protein coupled receptor	diagnosis,disease progression		2925	14829	24938
GRWD1	glutamate-rich WD repeat containing 1	GRWD1		Nucleus	other			83743	101612	308592
GSDMD	gasdermin D	GSDMD		Extracellular Space	other			79792	69146	315084
GSK3B	glycogen synthase kinase 3 beta	--		Nucleus	kinase	diagnosis,efficacy	enzastaurin	2932	56637	84027
GSTO2	glutathione S-transferase omega 2	GSTO2		Cytoplasm	enzyme			119391	68214	309465
GSTP1	glutathione S-transferase pi 1	GSTP1	6	Cytoplasm	enzyme	diagnosis,efficacy,prognosis,response to therapy,safety,unspecified application		2950	100042625|14869|14870	24426
GYG2	glycogenin 2	GYG2		Cytoplasm	enzyme			8908
GYLTL1B	glycosyltransferase-like 1B	GYLTL1B		Cytoplasm	enzyme			120071	228366	311202
H2AFX	H2A histone family, member X	--	12	Nucleus	transcription regulator	efficacy		3014	15270	500987
H2AFZ	H2A histone family, member Z	H2AFZ	11	Nucleus	other			3015	51788	58940
HACL1	2-hydroxyacyl-CoA lyase 1	HACL1	22	Cytoplasm	enzyme			26061	56794	85255
HAPLN3	hyaluronan and proteoglycan link protein 3	HAPLN3		Extracellular Space	other			145864	67666	308773
HAS3	hyaluronan synthase 3	HAS3	13	Plasma Membrane	enzyme			3038	15118	266805
HDAC1	histone deacetylase 1	--		Nucleus	transcription regulator	efficacy	tributyrin, belinostat, pyroxamide, MGCD0103, vorinostat, romidepsin	3065	433759	297893
HDAC6	histone deacetylase 6	--		Nucleus	transcription regulator	efficacy	tributyrin, belinostat, pyroxamide, vorinostat, romidepsin	10013	15185	84581
Hdac	--	--	18	Nucleus	group
HEATR1	HEAT repeat containing 1	HEATR1		Nucleus	other			55127	217995	361262
HELLS	helicase, lymphoid-specific	HELLS		Nucleus	enzyme			3070	15201	294071
HERC5	HECT and RLD domain containing E3 ubiquitin protein ligase 5	HERC5	4	Cytoplasm	enzyme			51191
HESX1	HESX homeobox 1	HESX1		Nucleus	transcription regulator			8820	15209	498575
HGF	hepatocyte growth factor (hepapoietin A; scatter factor)	--	18	Extracellular Space	growth factor	diagnosis,disease progression,efficacy,prognosis,unspecified application		3082	15234	24446
HIF1A	hypoxia inducible factor 1, alpha subunit (basic helix-loop-helix transcription factor)	--		Nucleus	transcription regulator	diagnosis,efficacy,prognosis,response to therapy		3091	15251	29560
HINT1	histidine triad nucleotide binding protein 1	--		Nucleus	enzyme	prognosis		3094	15254	690660
HIPK2	homeodomain interacting protein kinase 2	--	25	Nucleus	kinase			28996	15258	362342
HIST1H2BH/HIST1H2BO	histone cluster 1, H2bo	HIST1H2BH		Nucleus	other			8345|8348	319182	100359692
Histone h3	--	--	11	Nucleus	group	prognosis
Histone h4	--	--	11	Nucleus	group	efficacy
HJURP	Holliday junction recognition protein	HJURP	17	Nucleus	other			55355	381280	316602
HLA-A	major histocompatibility complex, class I, A	HLA-A	20	Plasma Membrane	other	efficacy,response to therapy		3105	15007
HLA-C	major histocompatibility complex, class I, C	HLA-C	7,20	Plasma Membrane	other	response to therapy		3107
HLA-DOA	major histocompatibility complex, class II, DO alpha	HLA-DOA		Plasma Membrane	transmembrane receptor			3111	15001	24984
HLA-DPA1	major histocompatibility complex, class II, DP alpha 1	HLA-DPA1	20	Plasma Membrane	transmembrane receptor			3113		24986
HLA-DPB1	major histocompatibility complex, class II, DP beta 1	HLA-DPB1	19	Plasma Membrane	transmembrane receptor			3115
HLA-DQB1	major histocompatibility complex, class II, DQ beta 1	HLA-DQB1	7	Plasma Membrane	other			3119	14961	309622
HLA-DR	--	--	10	Plasma Membrane	complex	efficacy,prognosis
HLA-DRA	major histocompatibility complex, class II, DR alpha	HLA-DRA		Plasma Membrane	transmembrane receptor	prognosis		3122	100504404	294269
HMGA1	high mobility group AT-hook 1	HMGA1	8	Nucleus	transcription regulator	unspecified application		3159	111241	117062
HMGA2	high mobility group AT-hook 2	HMGA2	5	Nucleus	enzyme	prognosis		8091	15364	84017
HMGN5	high mobility group nucleosome binding domain 5	HMGN5		Nucleus	transcription regulator			79366	50887	681284
HMHA1	histocompatibility (minor) HA-1	HMHA1		Cytoplasm	transporter			23526	70719	314618
HMMR	hyaluronan-mediated motility receptor (RHAMM)	HMMR	10	Plasma Membrane	transmembrane receptor			3161	15366	25460
HMOX1	heme oxygenase (decycling) 1	HMOX1	9	Cytoplasm	enzyme	efficacy,safety,unspecified application	tin mesoporphyrin	3162	15368	24451
HNF1A	HNF1 homeobox A	--	22	Nucleus	transcription regulator			6927	21405	24817
HNRNPA2B1	heterogeneous nuclear ribonucleoprotein A2/B1	--	24	Nucleus	other			3181	53379	362361
HNRNPAB	heterogeneous nuclear ribonucleoprotein A/B	HNRNPAB		Nucleus	enzyme			3182	15384	83498
HNRNPF	heterogeneous nuclear ribonucleoprotein F	HNRNPF	3	Nucleus	other			3185	98758	64200
HNRNPM	heterogeneous nuclear ribonucleoprotein M	HNRNPM	10	Nucleus	other			4670	76936	116655
HOOK2	hook homolog 2 (Drosophila)	HOOK2		Cytoplasm	other			29911	170833	304669
HPN	hepsin	HPN		Plasma Membrane	peptidase	diagnosis		3249	15451	29135
HPRT1	hypoxanthine phosphoribosyltransferase 1	HPRT1		Cytoplasm	enzyme		6-mercaptopurine, thioguanine, azathioprine	3251	15452	24465
HPS3	Hermansky-Pudlak syndrome 3	HPS3		Cytoplasm	other	diagnosis		84343	12807	310288
HRAS	v-Ha-ras Harvey rat sarcoma viral oncogene homolog	--		Plasma Membrane	enzyme	prognosis,safety		3265	15461	293621
HRASLS5	HRAS-like suppressor family, member 5	HRASLS5		unknown	other			117245	66727	293711
HS2ST1	heparan sulfate 2-O-sulfotransferase 1	--	19	Cytoplasm	enzyme			9653	23908	292155
HSD11B2	hydroxysteroid (11-beta) dehydrogenase 2	HSD11B2		Cytoplasm	enzyme			3291	15484	25117
HSF1	heat shock transcription factor 1	--	20	Nucleus	transcription regulator			3297	15499	79245
Hsp70	--	--	7	Cytoplasm	group	unspecified application
Hsp90	--	--	10	Cytoplasm	group
HSP90AB1	heat shock protein 90kDa alpha (cytosolic), class B member 1	HSP90AB1	8	Cytoplasm	enzyme		17-dimethylaminoethylamino-17-demethoxygeldanamycin, IPI-504, cisplatin	3326	15516	301252
HSPA2	heat shock 70kDa protein 2	HSPA2	24	Cytoplasm	other			3306	15512	60460
HSPA4	heat shock 70kDa protein 4	HSPA4	7	Cytoplasm	other	efficacy		3308	15525	266759
HSPA9	heat shock 70kDa protein 9 (mortalin)	HSPA9	17	Cytoplasm	other			3313	15526	291671
HSPB1	heat shock 27kDa protein 1	--	20	Cytoplasm	other	diagnosis		3315	15507	24471
HSPD1	heat shock 60kDa protein 1 (chaperonin)	HSPD1	13	Cytoplasm	enzyme	diagnosis,prognosis		3329	15510	63868
HTATIP2	HIV-1 Tat interactive protein 2, 30kDa	HTATIP2	4	Nucleus	transcription regulator	efficacy		10553	53415	292935
HTR7	5-hydroxytryptamine (serotonin) receptor 7, adenylate cyclase-coupled	HTR7	10	Plasma Membrane	G-protein coupled receptor		asenapine, sultopride, lurasidone, eletriptan, almotriptan, amoxapine, fenfluramine, methysergide, ergotamine	3363	15566	65032
HTR1A	5-hydroxytryptamine (serotonin) receptor 1A, G protein-coupled	HTR1A	25	Plasma Membrane	G-protein coupled receptor		buspirone, caffeine/ergotamine, bifeprunox, iloperidone, flibanserin, asenapine, naluzotan, psilocybine, SLV-314, thioproperazine, lurasidone, cinitapride, pipothiazine, chloropromazine, vilazodone, trazodone, sumatriptan, doxepin, alprenolol, eletriptan, almotriptan, fenfluramine, quetiapine, nefazodone, ziprasidone, aripiprazole, methysergide, dihydroergotamine, apomorphine, ergotamine, naratri…	3350	15550	24473
HTR1D	5-hydroxytryptamine (serotonin) receptor 1D, G protein-coupled	HTR1D		Plasma Membrane	G-protein coupled receptor		caffeine/ergotamine, donitriptan, naproxen/sumatriptan, sumatriptan, eletriptan, frovatriptan, almotriptan, fenfluramine, ziprasidone, dihydroergotamine, ergotamine, naratriptan, zolmitriptan, rizatriptan	3352	15552	25323
HYOU1	hypoxia up-regulated 1	HYOU1	23	Cytoplasm	other			10525	12282	192235
I kappa b kinase	--	--		Cytoplasm	complex
IARS	isoleucyl-tRNA synthetase	IARS	21	Cytoplasm	enzyme			3376	105148	306804
ICMT	isoprenylcysteine carboxyl methyltransferase	ICMT	10	Cytoplasm	enzyme			23463	57295	170818
[truncated: 843 more rows]
