# Supplementary material for: Transcriptome Comparison of Human Neurons Generated Using Induced Pluripotent Stem Cells Derived from Dental Pulp and Skin Fibroblasts
Source: PLoS One. 2013 Oct 3;8(10):e75682. doi: 10.1371/journal.pone.0075682 (PMC3789755; doi:10.1371/journal.pone.0075682)
Supplement: Table S7 — Differentially expressed genes: T-iPSCs vs F-iPSCs. Differentially expressed genes in neurons derived from T-iPSCs and F-iPSCs in descending order of significance. (XLS) [file pone.0075682.s009.xls]

## Sheet: Sheet1
ENSG_ID	gene_symbol	coordinates	FPKM_TIPS4	FPKM_TIPS4-C5	FPKM_iPSC1	FPKM_iPSC2	mean_tooth_neurons	mean_skin_neurons	log2_fold change tooth/skin (H/I)	p-value	FDR
ENSG00000185985.7	SLITRK2	chrX:144899349-144907360	1.04759	0	60.622	63.6968	0.523795	62.1594	-6.87724	7.93652314621939e-29	1.14674822939724e-24
ENSG00000175356.8	SCUBE2	chr11:9025708-9113150	1.60923	1.70337	89.1964	131.226	1.6563	110.211	-6.05188	1.53126693504743e-26	1.10626379722502e-22
ENSG00000219438.4	FAM19A5	chr22:48885271-49246724	0	0	12.9082	11.1873	0	12.0478	-11.2351	2.91621152352174e-26	1.40454467677885e-22
ENSG00000170689.8	HOXB9	chr17:46698517-46703839	1.35572	8.65046	174.156	243.432	5.00309	208.794	-5.38171	1.98203228513278e-22	7.15959612197088e-19
ENSG00000138136.5	LBX1	chr10:102986732-102992362	0.0239917	0.173365	13.049	16.0268	0.0986783	14.5379	-7.13206	5.35726539694839e-22	1.54814255441015e-18
ENSG00000169840.4	GSX1	chr13:28366779-28368905	0	0	8.06245	10.1508	0	9.10663	-10.8316	2.15903835829846e-20	5.19932420650908e-17
ENSG00000221870.2	CXorf1	chrX:144908927-144911368	0.193635	0	13.4522	20.9177	0.0968175	17.185	-7.39944	1.16560495419506e-15	2.40597514045206e-12
ENSG00000075891.16	PAX2	chr10:102495359-102589698	0.0533856	0.224905	21.6001	15.0652	0.139145	18.3327	-6.99114	2.28907270566552e-14	3.8895736033567e-11
ENSG00000115353.5	TACR1	chr2:75276230-75426826	0.0998977	0.392475	32.996	21.227	0.246186	27.1115	-6.75427	2.42273945810854e-14	3.8895736033567e-11
ENSG00000108511.8	HOXB6	chr17:46626231-46683772	0.858463	4.01114	31.3449	44.0179	2.4348	37.6814	-3.94921	1.04061941416748e-13	1.50359099153059e-10
ENSG00000120075.5	HOXB5	chr17:46626231-46683772	0.872545	3.42406	33.5383	41.3962	2.1483	37.4672	-4.1212	4.83595421305253e-13	6.35224567494509e-10
ENSG00000180806.4	HOXC9	chr12:54384407-54449814	1.70087	0.0646802	18.8136	21.6996	0.882775	20.2566	-4.51241	1.35554112836204e-12	1.63218448030859e-09
ENSG00000120068.5	HOXB8	chr17:46688738-46692478	0.966816	13.5571	73.4956	94.2152	7.26196	83.8554	-3.52857	1.08680908125064e-10	1.20794649346081e-07
ENSG00000250451.1	HOXC-AS1	chr12:54384407-54449814	0.174758	0	16.025	25.1059	0.087379	20.5654	-7.79879	1.62736040086818e-10	1.67955217372459e-07
ENSG00000151952.10	TMEM132D	chr12:129556269-130388211	2.16971	2.06059	0.116241	0.00532179	2.11515	0.0607814	5.01034	5.91923350985731e-10	5.70180033226189e-07
ENSG00000150275.13	PCDH15	chr10:55562530-57387702	0.588934	1.12622	12.4913	13.8196	0.857577	13.1555	-3.93141	7.44220038990092e-10	6.7207720896049e-07
ENSG00000115828.11	QPCT	chr2:37571716-37600465	7.62832	2.8439	60.5883	45.6545	5.23611	53.1214	-3.34148	1.37583317446804e-09	1.16937726693463e-06
ENSG00000170549.3	IRX1	chr5:3596167-3601517	1.80832	4.27112	20.1344	24.9046	3.03972	22.5195	-2.88711	7.00398498351989e-08	5.49746855630445e-05
ENSG00000257638.1	RP11-324L3.3	chr10:102986732-102992362	0	0.32466	8.36378	12.491	0.16233	10.4274	-5.96223	7.31364690895147e-08	5.49746855630445e-05
ENSG00000120087.8	HOXB7	chr17:46684593-46688379	3.37329	10.6239	68.9423	58.6687	6.99859	63.8055	-3.18763	7.60947962669313e-08	5.49746855630445e-05
ENSG00000115194.6	SLC30A3	chr2:27476551-27504367	0.0937112	0.101364	2.26569	3.88654	0.0975376	3.07612	-4.90923	1.47588049027079e-07	0.000101548
ENSG00000144619.10	CNTN4	chr3:2140496-3102829	7.08785	4.66439	0.444691	0.0182117	5.87612	0.231451	4.63648	1.62178860274279e-07	0.000106515
ENSG00000170166.4	HOXD4	chr2:176986338-177039577	1.42359	0.469015	13.6662	9.87333	0.946302	11.7698	-3.62965	1.84243178063675e-07	0.000115745
ENSG00000157445.10	CACNA2D3	chr3:54156573-55108584	1.38604	0.988198	14.7433	12.1022	1.18712	13.4228	-3.49362	2.06073997395014e-07	0.000124065
ENSG00000138207.7	RBP4	chr10:95351443-95361501	0.915152	0.470829	17.3805	10.3685	0.69299	13.8745	-4.3136	2.74580914431026e-07	0.000158697
ENSG00000198353.5	HOXC4	chr12:54384407-54449814	1.58013	0.884366	10.6041	9.50596	1.23225	10.055	-3.02343	3.03541842406789e-07	0.000168688
ENSG00000118231.4	CRYGD	chr2:208986330-208989225	0	3.03511	24.4763	25.3115	1.51755	24.8939	-4.03152	3.96749699567326e-07	0.00021232
ENSG00000102760.12	RGCC	chr13:42031694-42045018	5.7139	2.72945	56.5454	36.4606	4.22167	46.503	-3.45988	5.05344961391176e-07	0.000260776
ENSG00000170561.8	IRX2	chr5:2745958-2755508	2.16008	9.67124	27.5812	40.6546	5.91566	34.1179	-2.52691	9.21654242441841e-07	0.000459206
ENSG00000168505.6	GBX2	chr2:237073878-237203570	0.723071	2.45458	9.64553	14.4929	1.58883	12.0692	-2.92136	1.11720294349418e-06	0.000538082
ENSG00000136750.7	GAD2	chr10:26505235-26593487	0.281313	1.08731	5.49685	8.23416	0.684311	6.8655	-3.31719	1.32410536717064e-06	0.000617161
ENSG00000186188.5	O3FAR1	chr10:95326421-95349829	0.0684781	0.280444	4.80931	3.29792	0.174461	4.05361	-4.49924	1.86678431571052e-06	0.000842911
ENSG00000128652.6	HOXD3	chr2:176986338-177039577	0.734905	2.4752	8.53722	7.49716	1.60505	8.01719	-2.31689	2.32139196907258e-06	0.00101642
ENSG00000188064.5	WNT7B	chr22:46316241-46373009	8.25	3.60216	25.1688	29.9874	5.92608	27.5781	-2.21742	4.56300904543993e-06	0.00191593
ENSG00000128573.17	FOXP2	chr7:113726381-114333827	22.7808	14.8795	6.16189	2.48233	18.8301	4.32211	2.12195	4.64097125186541e-06	0.00191593
ENSG00000125618.12	PAX8	chr2:113969098-114036527	2.03068	0.185935	25.1836	13.6678	1.10831	19.4257	-4.12541	5.31709201165601e-06	0.00213407
ENSG00000163081.2	CCDC140	chr2:223064606-223169936	0.0959567	3.09334	11.8625	15.3721	1.59465	13.6173	-3.09014	9.51108034030644e-06	0.00371421
ENSG00000139292.8	LGR5	chr12:71518864-71980090	5.28081	0.525456	17.985	17.2545	2.90313	17.6197	-2.59944	1.05926401608707e-05	0.00402771
ENSG00000197757.7	HOXC6	chr12:54384407-54449814	5.14478	0.468815	15.8335	18.4951	2.8068	17.1643	-2.61027	1.10450559286084e-05	0.00409205
ENSG00000154553.8	PDLIM3	chr4:186422902-186456766	5.19738	0.775314	13.4372	21.2786	2.98635	17.3579	-2.53714	1.18742432629158e-05	0.00428927
ENSG00000121570.8	DPPA4	chr3:109044987-109056419	2.96321	2.54292	15.1272	18.4267	2.75307	16.7769	-2.60518	1.76091169569924e-05	0.00620571
ENSG00000250133.1	HOXC-AS2	chr12:54384407-54449814	0.334882	0	9.91729	8.70018	0.167441	9.30873	-5.75519	1.84569249658821e-05	0.00634962
ENSG00000115665.4	SLC5A7	chr2:108602978-108630450	7.79501	2.88103	51.3611	83.3485	5.33802	67.3548	-3.65616	2.09061934331072e-05	0.00702497
ENSG00000173805.11	HAP1	chr17:39775688-39943183	1.43875	0.429234	4.73944	5.77428	0.933992	5.25686	-2.48639	2.64682531047915e-05	0.00869181
ENSG00000115507.5	OTX1	chr2:63277191-63284971	8.10404	3.69895	0.131154	0.0636189	5.90149	0.0973864	5.85021	4.81363191986473e-05	0.015456
ENSG00000117152.9	RGS4	chr1:163038564-163046592	8.13782	4.42302	34.647	37.6941	6.28042	36.1705	-2.52493	5.51245949613823e-05	0.0173151
ENSG00000233101.6	HOXB-AS3	chr17:46626231-46683772	0.088076	0.116326	6.61829	11.8405	0.102201	9.2294	-6.42863	5.91236643399985e-05	0.0181761
ENSG00000125285.4	SOX21	chr13:95361885-95364389	1.45856	15.7584	32.2328	31.924	8.60848	32.0784	-1.89716	9.0109160741752e-05	0.0271247
ENSG00000203727.3	SAMD5	chr6:147830062-148275073	12.5868	6.97131	2.3516	1.13977	9.77905	1.74568	2.48251	9.44814039816495e-05	0.0278604
ENSG00000244094.1	SPRR2F	chr1:153042703-153113927	0	0	2.92263	4.6289	0	3.77576	-9.56253	9.88871722202608e-05	0.0285764
ENSG00000106006.5	HOXA6	chr7:27145815-27197555	0.0938568	0.0549783	11.2296	4.55269	0.0744175	7.89114	-6.63555	0.000113957	0.0319444
ENSG00000261409.1	RP6-24A23.7	chrX:107963178-107979651	7.80024	3.27586	0.510733	0.31713	5.53805	0.413932	3.72589	0.000114963	0.0319444
ENSG00000152208.7	GRID2	chr4:93225549-94695707	2.15167	2.61312	15.5498	9.82497	2.38239	12.6874	-2.41045	0.00012054	0.0328619
ENSG00000148053.11	NTRK2	chr9:87283465-87638505	12.539	94.7614	194.819	210.552	53.6502	202.685	-1.91749	0.000126557	0.0338634
ENSG00000136720.6	HS6ST1	chr2:129023053-129076151	23.5778	43.8229	101.701	130.603	33.7004	116.152	-1.78503	0.000132726	0.0348684
ENSG00000162998.4	FRZB	chr2:183698001-183731890	20.0539	12.0023	60.0656	65.4727	16.0281	62.7692	-1.96912	0.000141313	0.0364612
ENSG00000120907.13	ADRA1A	chr8:26605666-26724790	1.77385	1.62649	9.13789	11.1309	1.70017	10.1344	-2.57198	0.000149255	0.0376643
ENSG00000244115.1	DNAJC25-GNG10	chr9:114393631-114432509	7.09264	3.71736	0.00378769	0.360643	5.405	0.182215	4.85286	0.000151189	0.0376643
ENSG00000134595.6	SOX3	chrX:139585151-139587225	1.83384	2.2526	6.90375	12.9987	2.04322	9.95122	-2.28123	0.000160312	0.0392602
ENSG00000176018.8	LYSMD3	chr5:89811427-90460038	11.0129	5.83969	1.29204	0.625024	8.42629	0.958532	3.12935	0.00016425	0.0395542
ENSG00000008394.7	MGST1	chr12:16500075-16530126	8.7398	12.0293	40.3419	64.9484	10.3846	52.6452	-2.3413	0.000189879	0.0445587
ENSG00000135333.9	EPHA7	chr6:93949737-94129265	16.1235	21.6211	7.6211	3.86704	18.8723	5.74407	1.71525	0.000191199	0.0445587
ENSG00000234511.4	C5orf58	chr5:169659450-169725231	0	1.77854	19.8001	6.38554	0.88927	13.0928	-3.87247	0.000212653	0.0487718
ENSG00000185559.9	DLK1	chr14:101192041-101201539	97.0709	189.824	543.731	933.338	143.447	738.534	-2.3641	0.000236121	0.053308
ENSG00000106689.6	LHX2	chr9:126763948-126795580	41.7115	17.218	0.771479	0.496312	29.4648	0.633895	5.52751	0.000258981	0.0575694
ENSG00000105855.4	ITGB8	chr7:20370324-20450419	5.7328	9.89837	32.9159	30.718	7.81559	31.8169	-2.02467	0.000267923	0.058013
ENSG00000112306.7	RPS12	chr6:133135579-133138703	133.857	82.8266	24.2305	34.3646	108.342	29.2976	1.88656	0.000269006	0.058013
ENSG00000170893.3	TRH	chr3:129693147-129696781	20.725	11.6344	1.67465	2.648	16.1797	2.16133	2.90131	0.000274309	0.0582867
ENSG00000259141.1	LYSMD3	chr5:89811427-90460038	1.38011	0.183738	7.55002	5.67037	0.781924	6.6102	-3.07149	0.000280955	0.0588336
ENSG00000182175.9	RGMA	chr15:93586635-93632433	16.2098	15.3217	45.0066	53.721	15.7658	49.3638	-1.64635	0.000331834	0.0684954
ENSG00000152192.5	POU4F1	chr13:79152610-79233314	0.0793614	18.0866	41.6327	36.2852	9.08298	38.959	-2.10011	0.000378791	0.0770867
ENSG00000101438.3	SLC32A1	chr20:37353104-37358015	0.225432	1.96275	4.92676	6.74005	1.09409	5.8334	-2.40926	0.00039407	0.0790821
ENSG00000115825.5	PRKD3	chr2:37394962-37551951	18.0362	22.5911	61.2823	83.2578	20.3137	72.27	-1.83069	0.000428245	0.0847631
ENSG00000157103.6	SLC6A1	chr3:11034409-11080933	2.01083	7.44782	16.6859	18.0705	4.72933	17.3782	-1.87646	0.000440581	0.0856568
ENSG00000106018.8	VIPR2	chr7:158799212-158937649	0.160846	0.628569	2.74681	2.29881	0.394707	2.52281	-2.66087	0.000444616	0.0856568
ENSG00000154764.5	WNT7A	chr3:13857754-13921618	0.730712	1.83716	6.44935	11.6041	1.28394	9.02673	-2.80882	0.00045465	0.0864374
ENSG00000262619.1	LINC00621	chr13:23468794-23490508	1.51679	1.83217	12.9892	9.63107	1.67448	11.3101	-2.75217	0.000484497	0.0909156
ENSG00000171587.10	DSCAM	chr21:41382925-42219065	1.23326	2.21152	0.161547	0.400433	1.72239	0.28099	2.59456	0.000500008	0.0926233
ENSG00000183793.9	PKD1P1	chr16:15457515-15474904	7.63185	4.71809	37.283	21.6438	6.17497	29.4634	-2.2535	0.000532368	0.0965603
ENSG00000122592.6	HOXA7	chr7:27145815-27197555	0.288869	0.0730041	26.5568	8.34118	0.180937	17.449	-6.5526	0.000534627	0.0965603
ENSG00000197576.8	HOXA4	chr7:27145815-27197555	0.330405	2.01502	4.97752	5.0865	1.17271	5.03201	-2.09658	0.000559817	0.0998618
ENSG00000185920.10	PTCH1	chr9:98205261-98279339	2.23602	4.43319	10.3363	16.7082	3.3346	13.5222	-2.01812	0.000583335	0.102788
ENSG00000205835.4	GMNC	chr3:190570665-190580465	4.73464	1.4982	0.149893	0	3.11642	0.0749465	5.28702	0.000626486	0.109061
ENSG00000143032.6	BARHL2	chr1:91177158-91182794	2.97366	3.02266	0.614843	0.378704	2.99816	0.496773	2.58137	0.000638698	0.109864
ENSG00000142700.7	DMRTA2	chr1:50883221-50889172	8.82404	2.86439	0.0649908	0.0396738	5.84422	0.0523323	6.67275	0.000671895	0.114214
ENSG00000242207.1	HOXB-AS4	chr17:46706036-46712294	0	0	9.56006	2.77302	0	6.16654	-10.2695	0.00068901	0.115762
ENSG00000007350.12	TKTL1	chrX:153524023-153558700	0.0962984	0.751354	3.74007	3.97252	0.423826	3.85629	-3.17062	0.000707781	0.117549
ENSG00000189223.7	AC016683.6	chr2:113969098-114036527	0.117749	0.0195936	3.0616	1.58863	0.0686713	2.32511	-4.98315	0.000717979	0.117873
ENSG00000204525.8	HLA-C	chr6:31236525-31239907	15.614	27.1355	40.2409	52.0434	21.3747	46.1422	-1.11	0.000726051	0.117873
ENSG00000163273.3	NPPC	chr2:232786529-232791113	4.71027	4.67246	15.2307	25.9703	4.69137	20.6005	-2.13341	0.000750382	0.12047
ENSG00000153266.8	FEZF2	chr3:62355355-62359999	18.1878	5.87622	0.0936849	0.0956668	12.032	0.0946759	6.91602	0.000777154	0.123397
ENSG00000254369.2	HOXA-AS3	chr7:27145815-27197555	0.162758	0.00948656	3.29231	1.42923	0.0861223	2.36077	-4.69836	0.000864422	0.135197
ENSG00000140090.13	SLC24A4	chr14:92788924-92962596	0.6579	0.0813302	3.16996	1.98691	0.369615	2.57843	-2.78581	0.000870189	0.135197
ENSG00000144191.7	CNGA3	chr2:98947851-99015064	0.960475	3.58679	10.0403	8.37798	2.27363	9.20914	-2.01568	0.000880674	0.135371
ENSG00000103449.7	SALL1	chr16:51169885-51185186	2.71217	1.02411	16.4553	8.94365	1.86814	12.6995	-2.76181	0.000918898	0.13976
ENSG00000187416.7	LHFPL3	chr7:103969103-104549001	4.63815	4.79749	18.0568	21.6534	4.71782	19.8551	-2.07215	0.00101261	0.151753
ENSG00000088992.13	TESC	chr12:117476727-117537284	1.39824	0.457998	6.34881	7.3643	0.928119	6.85656	-2.8784	0.00101876	0.151753
ENSG00000165970.7	SLC6A5	chr11:20620945-20680831	0.0222898	0.43174	6.2069	16.8482	0.227015	11.5275	-5.63535	0.00104763	0.154461
ENSG00000165246.7	NLGN4Y	chrY:16634631-16957530	11.6224	8.39779	0.0712789	4.40796	10.0101	2.23962	2.15763	0.00115203	0.168095
ENSG00000154721.10	JAM2	chr21:27011583-27144771	7.74274	42.1391	66.1998	108.877	24.9409	87.5384	-1.81119	0.00117089	0.168095
ENSG00000169085.6	C8orf46	chr8:67405442-67430759	0.110087	1.59888	5.25227	5.0804	0.854484	5.16634	-2.58899	0.001175	0.168095
ENSG00000125869.4	LAMP5	chr20:9485826-9511171	1.5013	17.3503	40.3826	64.6676	9.4258	52.5251	-2.47769	0.0012539	0.177348
ENSG00000106004.4	HOXA5	chr7:27145815-27197555	0.676809	0.32374	19.5474	8.14053	0.500274	13.844	-4.77657	0.00126423	0.177348
ENSG00000163508.8	EOMES	chr3:27757439-27764206	9.22243	2.82945	0.044494	0.0320815	6.02594	0.0382877	7.12228	0.00129126	0.177987
ENSG00000125430.4	HS3ST3B1	chr17:14204399-14252721	2.55296	1.08784	6.32227	11.1159	1.8204	8.71908	-2.25679	0.00129557	0.177987
ENSG00000229743.2	AC018730.3	chr2:105469742-105542510	0.192003	2.73238	5.61435	6.58508	1.46219	6.09971	-2.05687	0.00131644	0.177987
ENSG00000110900.10	TSPAN11	chr12:31079361-31149534	9.13751	19.469	46.2325	34.2796	14.3033	40.2561	-1.49254	0.00131992	0.177987
ENSG00000233639.1	AC018730.1	chr2:105424029-105469641	4.40087	13.574	36.5854	52.4245	8.98743	44.505	-2.30734	0.00133038	0.177987
ENSG00000260597.1	AC012531.25	chr12:54384407-54449814	0.561103	0.0107019	1.81264	2.39227	0.285902	2.10245	-2.85689	0.00135365	0.179439
ENSG00000140067.5	FAM181A	chr14:94385239-94395954	0.342669	1.86073	5.33914	6.93261	1.1017	6.13588	-2.47218	0.00166406	0.218582
ENSG00000198963.5	RORB	chr9:77100466-77302117	2.85879	4.81043	0.603796	0.929607	3.83461	0.766701	2.31484	0.00175762	0.228792
ENSG00000170381.8	SEMA3E	chr7:82993221-83278326	1.02152	1.65348	7.15876	4.37368	1.3375	5.76622	-2.10395	0.00190383	0.245612
ENSG00000197467.7	COL13A1	chr10:71561643-71718904	3.67748	2.48943	0.842092	0.366047	3.08345	0.60407	2.34221	0.0020608	0.263509
ENSG00000135903.13	PAX3	chr2:223064606-223169936	1.20122	29.9261	55.9735	96.8094	15.5637	76.3914	-2.29486	0.00213786	0.270965
ENSG00000053108.12	FSTL4	chr5:132496129-132948255	1.42119	1.82057	0.431922	0.355847	1.62088	0.393884	2.02718	0.00239389	0.300776
ENSG00000154319.10	FAM167A	chr8:11225910-11325103	2.56998	3.08395	8.45843	8.04536	2.82697	8.2519	-1.5438	0.00249415	0.309511
ENSG00000103187.5	COTL1	chr16:84599199-84651683	42.8805	33.0948	90.7375	90.9518	37.9877	90.8447	-1.25776	0.00250625	0.309511
ENSG00000112238.10	PRDM13	chr6:100054605-100063454	0.050837	2.25618	4.33188	7.7053	1.15351	6.01859	-2.37835	0.00267587	0.327658
ENSG00000173406.10	DAB1	chr1:57394882-58716211	6.77929	5.32871	2.78334	1.17414	6.054	1.97874	1.61086	0.00270721	0.32871
ENSG00000146006.5	LRRTM2	chr5:137946655-138270723	4.7945	14.0103	34.4988	33.9968	9.4024	34.2478	-1.86435	0.00281676	0.339161
ENSG00000263146.2	RP11-849I19.1	chr18:76736554-76739074	4.02125	0.178697	14.7879	14.0977	2.09997	14.4428	-2.77898	0.00287591	0.343422
ENSG00000171766.10	GATM	chr15:45653321-45694525	4.25312	8.56417	32.1223	20.8551	6.40864	26.4887	-2.04643	0.00295215	0.349637
ENSG00000146276.7	GABRR1	chr6:89887219-89940997	0.284604	1.04213	3.89766	2.5083	0.663367	3.20298	-2.26295	0.00331038	0.388875
ENSG00000069020.13	MAST4	chr5:65892175-66465423	8.04219	7.75737	3.22398	2.90556	7.89978	3.06477	1.36459	0.00336095	0.391632
ENSG00000198822.6	GRM3	chr7:86273229-86494200	7.42639	5.28977	2.03062	2.24111	6.35808	2.13586	1.57153	0.00359442	0.415486
ENSG00000164600.4	NEUROD6	chr7:31377074-31380508	30.187	6.72218	0.228493	0.0208832	18.4546	0.124688	7.15318	0.00402754	0.460252
ENSG00000131941.3	RHPN2	chr19:33469498-33555794	2.81579	6.42936	15.5216	12.5222	4.62257	14.0219	-1.59987	0.0040454	0.460252
ENSG00000174469.12	CNTNAP2	chr7:145813452-148118090	57.798	39.5502	21.4932	19.9901	48.6741	20.7416	1.23042	0.00422711	0.477168
ENSG00000164237.4	CMBL	chr5:10279388-10308138	10.1006	10.2318	26.0868	42.2828	10.1662	34.1848	-1.74908	0.00430733	0.482455
ENSG00000172175.8	MALT1	chr18:56337711-56421709	11.1867	9.90631	38.2944	30.571	10.5465	34.4327	-1.70654	0.00440038	0.489086
ENSG00000184156.10	KCNQ3	chr8:133139192-133493200	4.38355	3.23181	1.46228	1.28928	3.80768	1.37578	1.46532	0.0047297	0.521675
ENSG00000123892.6	RAB38	chr11:87831758-87908635	1.8173	0.308449	5.76917	10.6287	1.06287	8.19894	-2.94157	0.00517042	0.562225
ENSG00000254656.1	RTL1	chr14:101346991-101351184	0.523813	0.584006	3.31072	8.24668	0.55391	5.7787	-3.37131	0.00517516	0.562225
ENSG00000151490.9	PTPRO	chr12:15260716-15750333	15.0338	17.1225	8.29178	5.31103	16.0782	6.8014	1.24059	0.00535989	0.577948
ENSG00000123119.7	NECAB1	chr8:91634222-91997485	3.72005	7.22467	0.872806	1.31832	5.47236	1.09556	2.31524	0.00554532	0.585419
ENSG00000206503.7	HLA-A	chr6:29909036-29913661	8.94219	5.82318	16.6218	29.5065	7.38269	23.0641	-1.64277	0.00554653	0.585419
ENSG00000197147.7	LRRC8B	chr1:89990394-90098453	4.18718	8.11281	19.7116	20.7331	6.14999	20.2223	-1.71648	0.00555072	0.585419
ENSG00000118298.5	CA14	chr1:150230168-150237478	22.776	30.5175	66.064	80.1662	26.6467	73.1151	-1.45604	0.00567228	0.593904
ENSG00000147655.6	RSPO2	chr8:108911543-109095913	100.387	21.2761	1.60805	0.515487	60.8316	1.06177	5.83362	0.00580436	0.603361
ENSG00000179314.9	WSCD1	chr17:5676245-6027747	8.77146	16.9813	43.179	34.4788	12.8764	38.8289	-1.59203	0.00627858	0.638593
ENSG00000169306.5	IL1RAPL1	chrX:28605515-29974840	0.811612	0.694985	4.36565	3.29797	0.753298	3.83181	-2.33907	0.00631356	0.638593
ENSG00000172005.6	MAL	chr2:95690937-95719737	0.34007	0.858982	4.64153	3.30048	0.599526	3.971	-2.71744	0.00635607	0.638593
ENSG00000197705.5	KLHL14	chr18:30252633-30354376	0.848697	1.18272	4.13485	3.52475	1.01571	3.8298	-1.90958	0.00635923	0.638593
ENSG00000269410.1	CTB-60E11.4	chr19:39903224-39919055	0.0710974	0.482903	2.37173	2.3021	0.277	2.33691	-3.05392	0.00636427	0.638593
ENSG00000064218.4	DMRT3	chr9:976963-991731	5.12484	1.5362	0.173726	0.0155555	3.33052	0.0946407	5.06503	0.0064177	0.639513
ENSG00000139352.3	ASCL1	chr12:103230662-103354294	1.99709	18.8035	41.0202	30.9685	10.4003	35.9943	-1.79065	0.00667259	0.657267
ENSG00000076356.6	PLXNA2	chr1:208195586-208417665	6.25553	14.6246	25.6652	40.2839	10.4401	32.9746	-1.65875	0.00668684	0.657267
ENSG00000101220.13	C20orf27	chr20:3734154-3749034	7.41313	6.56667	14.4318	19.2619	6.9899	16.8468	-1.26853	0.00701436	0.6848
ENSG00000166509.6	CLEC3A	chr16:78048579-78100658	0.503214	0.0276041	15.5071	4.52899	0.265409	10.018	-5.21203	0.00711176	0.685102
ENSG00000175352.6	NRIP3	chr11:9002122-9025596	2.1735	1.42067	12.8496	31.299	1.79709	22.0743	-3.61496	0.00711227	0.685102
ENSG00000107742.7	SPOCK2	chr10:73818792-73848790	8.17557	16.3924	50.5272	28.9384	12.284	39.7328	-1.69315	0.00718201	0.687238
ENSG00000158525.11	CPA5	chr7:129984629-130008571	0.573944	0.207749	7.04582	4.37275	0.390846	5.70928	-3.85156	0.00771641	0.733515
ENSG00000151414.10	NEK7	chr1:198126092-198291550	16.5699	17.6785	5.91755	7.00047	17.1242	6.45901	1.40596	0.0081311	0.767884
ENSG00000172572.6	PDE3A	chr12:20514665-20837315	17.2772	15.4834	53.0361	35.5125	16.3803	44.2743	-1.43423	0.00836864	0.780456
ENSG00000156395.8	SORCS3	chr10:106400858-107024993	3.45084	2.4262	1.60181	0.413835	2.93852	1.00782	1.53916	0.00837225	0.780456
ENSG00000125954.7	CHURC1-FNTB	chr14:65381078-65569413	0.233635	0.60269	2.71403	1.89437	0.418162	2.3042	-2.44811	0.00871883	0.807554
ENSG00000265150.1	RN7SL2	chr14:50329270-50329567	235.304	65.7339	352.472	551.798	150.519	452.135	-1.58678	0.0091307	0.840315
ENSG00000075290.7	WNT8B	chr10:102222797-102243501	4.7274	16.1233	0.299087	0.208851	10.4253	0.253969	5.33186	0.00942154	0.856726
ENSG00000134323.10	MYCN	chr2:16060520-16087129	6.37606	16.2331	21.117	32.1928	11.3046	26.6549	-1.23713	0.0094276	0.856726
ENSG00000162944.5	RFTN2	chr2:198435523-198540769	9.00038	15.6256	29.9408	36.5137	12.313	33.2272	-1.43182	0.00968582	0.87469
ENSG00000139174.6	PRICKLE1	chr12:42632248-42984157	18.6102	9.56917	5.19926	2.77606	14.0897	3.98766	1.81973	0.00977614	0.877363
ENSG00000151229.7	SLC2A13	chr12:40148822-40499891	5.24371	8.0013	2.706	1.82143	6.62251	2.26371	1.54659	0.00984548	0.878131
ENSG00000147027.3	TMEM47	chrX:34645180-34675405	15.119	39.8277	86.6254	75.5546	27.4733	81.09	-1.56132	0.00999609	0.886095
ENSG00000114861.14	FOXP1	chr3:71003843-71633140	14.0611	14.8743	7.17212	4.38446	14.4677	5.77829	1.32337	0.0100815	0.888219
ENSG00000146469.8	VIP	chr6:153071932-153080900	0.374038	0.115575	5.58575	3.44036	0.244806	4.51305	-4.17682	0.010232	0.896011
ENSG00000134121.5	CHL1	chr3:238278-451090	10.0085	22.9203	4.4699	0	16.4644	2.23495	2.87825	0.0103068	0.897127
ENSG00000037965.4	HOXC8	chr12:54384407-54449814	1.84453	0.0422886	2.80451	4.35601	0.943409	3.58026	-1.9185	0.0108378	0.937695
ENSG00000133107.10	TRPC4	chr13:38210772-38444562	1.09087	3.24543	9.59551	7.83516	2.16815	8.71533	-2.0046	0.0110447	0.949744
ENSG00000225988.1	RP5-1119D9.4	chr20:9485826-9511171	0	0.402716	1.18769	2.45345	0.201358	1.82057	-3.14513	0.0111608	0.949744
ENSG00000127152.13	BCL11B	chr14:99635623-99737861	3.00888	1.97892	1.06996	0.589925	2.4939	0.829943	1.58154	0.0111742	0.949744
ENSG00000148400.9	NOTCH1	chr9:139388895-139440314	8.12177	20.7015	31.64	33.2567	14.4116	32.4484	-1.17063	0.0112917	0.954115
ENSG00000150551.10	LYPD1	chr2:133174146-133429152	13.9683	14.1404	37.6177	27.0698	14.0543	32.3438	-1.20218	0.011374	0.955482
ENSG00000145794.12	MEGF10	chr5:126626522-126796914	4.46464	16.6142	31.7763	31.1773	10.5394	31.4768	-1.57804	0.0117774	0.983647
ENSG00000116711.8	PLA2G4A	chr1:186798084-186958113	0.573008	1.13863	3.81582	5.42463	0.855819	4.62022	-2.42574	0.0122063	1
ENSG00000144476.5	CXCR7	chr2:237476429-237491001	17.9496	6.08609	23.1363	27.9349	12.0178	25.5356	-1.08701	0.0125112	1
ENSG00000080166.9	DCT	chr13:95091740-95131936	13.8898	5.3145	0.623386	1.58291	9.60215	1.10315	3.11596	0.0129452	1
ENSG00000260230.1	RP11-526J3.3	chr9:111892572-111898218	12.2918	8.19922	4.98203	3.64433	10.2455	4.31318	1.2472	0.0130271	1
ENSG00000185518.7	SV2B	chr15:91643179-91844539	0.869329	1.1707	3.67084	4.05083	1.02001	3.86084	-1.91514	0.0131186	1
ENSG00000164649.15	CDCA7L	chr7:21582832-21985702	6.28711	10.6232	2.99985	1.19463	8.45516	2.09724	2.00876	0.0131584	1
ENSG00000151468.9	CCDC3	chr10:12938626-13180291	7.08013	9.02108	27.6273	16.4416	8.0506	22.0344	-1.45202	0.01321	1
ENSG00000115993.7	TRAK2	chr2:202241929-202345569	13.8311	8.66002	6.31533	3.74608	11.2456	5.03071	1.15973	0.0133988	1
ENSG00000175426.6	PCSK1	chr5:95726118-95769847	5.62072	4.49713	33.2614	16.5864	5.05893	24.9239	-2.29949	0.0134858	1
ENSG00000176641.6	RNF152	chr18:59475295-59561464	5.57865	7.10403	3.67134	2.03962	6.34134	2.85548	1.14967	0.0136343	1
ENSG00000008513.10	ST3GAL1	chr8:134467090-134584183	8.55334	9.33896	4.11248	3.17269	8.94615	3.64258	1.29513	0.013702	1
ENSG00000132821.7	VSTM2L	chr20:36531498-36573752	9.91205	23.8452	41.0743	34.8538	16.8786	37.9641	-1.1692	0.0137689	1
ENSG00000197410.7	DCHS2	chr4:155155526-155412930	2.10567	1.10269	0.632183	0.339381	1.60418	0.485782	1.71317	0.0139492	1
ENSG00000100918.8	REC8	chr14:24641061-24683075	9.84558	22.1801	44.4791	39.485	16.0128	41.9821	-1.39026	0.0140041	1
ENSG00000130589.11	HELZ2	chr20:62189438-62205592	1.74971	3.62081	5.76424	10.4098	2.68526	8.08702	-1.58875	0.0141285	1
ENSG00000006128.7	TAC1	chr7:97361219-97369784	22.3497	40.3566	10.8721	10.8701	31.3531	10.8711	1.52768	0.014184	1
ENSG00000188779.6	SKOR1	chr15:68112041-68131217	0.408539	3.39575	12.3981	6.34644	1.90214	9.37227	-2.29775	0.0143523	1
ENSG00000070961.10	ATP2B1	chr12:89954905-90103077	36.7517	24.605	18.4974	12.6158	30.6784	15.5566	0.979466	0.0144251	1
ENSG00000136160.10	EDNRB	chr13:78469615-78493903	6.45644	60.4992	107.068	124.464	33.4778	115.766	-1.78978	0.014708	1
ENSG00000048740.11	CELF2	chr10:11047258-11378666	31.0565	29.89	19.4427	12.4049	30.4733	15.9238	0.936142	0.0151491	1
ENSG00000067646.7	ZFY	chrY:2803111-2850547	5.72159	4.46147	0	3.54199	5.09153	1.771	1.52089	0.0152005	1
ENSG00000180537.8	RNF182	chr6:13924676-13980533	14.0282	7.16041	3.0043	3.27414	10.5943	3.13922	1.7532	0.0153448	1
ENSG00000103740.5	ACSBG1	chr15:78441662-78538030	0.0734852	0.36917	1.2012	4.1972	0.221328	2.6992	-3.57872	0.0153987	1
ENSG00000130775.11	THEMIS2	chr1:28199054-28213196	0.90741	0.98536	3.04607	4.39229	0.946385	3.71918	-1.96882	0.0156481	1
ENSG00000154783.6	FGD5	chr3:14860468-15106842	1.1649	0.821563	3.6756	2.21141	0.993232	2.94351	-1.56254	0.0161721	1
ENSG00000198947.9	DMD	chrX:31115793-33357558	21.8462	11.7416	6.21775	3.0235	16.7939	4.62062	1.86065	0.016954	1
ENSG00000152284.4	TCF7L1	chr2:85360532-85537511	24.8406	15.8779	10.8176	6.54193	20.3592	8.67976	1.22948	0.0169762	1
ENSG00000173376.9	NDNF	chr4:121956767-122001631	10.3802	5.00815	20.3155	19.4629	7.69417	19.8892	-1.36957	0.0170919	1
ENSG00000198719.7	DLL1	chr6:170591293-170599561	2.15867	21.0584	33.4226	56.5039	11.6085	44.9633	-1.9531	0.0172905	1
ENSG00000078399.11	HOXA9	chr7:27202053-27219880	0.678799	0.0494416	56.2256	10.776	0.36412	33.5008	-6.50418	0.0176972	1
ENSG00000176463.8	SLCO3A1	chr15:92396924-92874267	12.4705	6.3389	22.5341	27.601	9.4047	25.0675	-1.41389	0.0180601	1
ENSG00000143125.4	PROK1	chr1:110993821-110999976	0.0476196	0.30213	2.95725	1.04069	0.174875	1.99897	-3.4778	0.0183005	1
ENSG00000217236.1	SP9	chr2:175199673-175203220	2.07823	0.598324	4.57638	3.09309	1.33828	3.83474	-1.51525	0.0186179	1
ENSG00000123360.7	PDE1B	chr12:54943133-54973023	1.92828	6.04671	9.15951	14.2212	3.9875	11.6904	-1.55057	0.0192414	1
ENSG00000113805.8	CNTN3	chr3:74311718-74570291	4.51065	3.08525	2.17795	0.669452	3.79795	1.4237	1.41241	0.0193523	1
ENSG00000163254.4	CRYGC	chr2:208992860-208994554	0	0.399949	1.6675	5.26632	0.199974	3.46691	-4.08221	0.019547	1
ENSG00000004848.6	ARX	chrX:25021810-25034065	4.16518	0.804668	0.0222417	0.0385845	2.48492	0.0304131	6.13567	0.0198407	1
ENSG00000131398.9	KCNC3	chr19:50815193-50886239	8.90209	4.49504	1.99909	0.506002	6.69857	1.25255	2.41432	0.020196	1
ENSG00000082684.10	SEMA5B	chr3:122628040-122747452	6.0502	39.6746	52.2354	56.4386	22.8624	54.337	-1.24878	0.0202388	1
ENSG00000183779.5	ZNF703	chr8:37553268-37557537	32.5166	30.1418	16.3566	10.021	31.3292	13.1888	1.24788	0.0203949	1
ENSG00000112139.9	MDGA1	chr6:37598454-37667082	17.2708	20.4879	6.56143	8.94841	18.8794	7.75492	1.28308	0.020602	1
ENSG00000103154.5	NECAB2	chr16:84002236-84036381	7.75774	19.0695	37.3458	64.5509	13.4136	50.9483	-1.92494	0.0210013	1
ENSG00000146242.5	TPBG	chr6:83072922-83080545	96.1171	57.6592	23.4925	43.4902	76.8881	33.4913	1.19885	0.0211941	1
ENSG00000178573.6	MAF	chr16:79619739-79634611	9.68462	4.62146	1.57017	0.738109	7.15304	1.15414	2.62651	0.0214048	1
ENSG00000059378.8	PARP12	chr7:139723543-139763521	1.32114	0.287309	2.77017	4.1564	0.804225	3.46328	-2.09961	0.0217142	1
ENSG00000169908.6	TM4SF1	chr3:149086808-149104370	5.52572	1.40136	0.166312	0.207713	3.46354	0.187012	4.17506	0.0218741	1
ENSG00000139370.6	SLC15A4	chr12:129277738-129308528	15.1107	8.07977	1.15257	6.33057	11.5952	3.74157	1.63051	0.021892	1
ENSG00000175928.5	LRRN1	chr3:3823035-4508965	124.439	97.7506	53.2307	52.4755	111.095	52.8531	1.07166	0.0219297	1
ENSG00000171724.2	VAT1L	chr16:77822426-78014004	70.4733	35.6493	104.574	124.969	53.0613	114.772	-1.11296	0.0220798	1
ENSG00000158023.5	WDR66	chr12:122326636-122441833	2.12836	1.6096	0.44782	0.557993	1.86898	0.502906	1.88347	0.0221832	1
ENSG00000143126.6	CELSR2	chr1:109792640-109818372	8.33609	31.2878	41.8818	45.4728	19.8119	43.6773	-1.14031	0.0222454	1
ENSG00000163083.5	INHBB	chr2:121103718-121109384	0.482759	0.878568	2.29209	2.63497	0.680663	2.46353	-1.84808	0.0224888	1
ENSG00000163909.6	HEYL	chr1:40089824-40105617	0.284164	1.131	3.27714	1.88204	0.707582	2.57959	-1.85881	0.0225396	1
ENSG00000163686.9	ABHD6	chr3:58223232-58280461	10.8276	5.50906	2.88324	2.93244	8.16833	2.90784	1.4885	0.0227853	1
ENSG00000184613.6	NELL2	chr12:44902057-45315631	68.4818	79.0303	37.105	40.0989	73.7561	38.602	0.933999	0.0228375	1
ENSG00000136826.9	KLF4	chr9:110247132-110252763	2.3776	2.28893	5.37935	7.99344	2.33326	6.68639	-1.51687	0.0235911	1
ENSG00000168702.12	LRP1B	chr2:140988991-142889270	7.78857	2.46928	0.944792	0.42988	5.12892	0.687336	2.89052	0.0237326	1
ENSG00000111348.4	ARHGDIB	chr12:15094950-15114662	2.46592	3.73992	0.456726	0.584672	3.10292	0.520699	2.56364	0.0241771	1
ENSG00000182319.5	SGK223	chr8:8175257-8244008	4.13741	9.89942	12.2051	19.3009	7.01841	15.753	-1.16584	0.0242932	1
ENSG00000162761.10	LMX1A	chr1:165171103-165325952	7.82495	1.95097	0.119991	0.131325	4.88796	0.125658	5.22684	0.0243916	1
ENSG00000131370.11	SH3BP5	chr3:15295690-15382875	30.3167	20.2141	16.1068	10.5943	25.2654	13.3506	0.920009	0.024674	1
ENSG00000261185.1	RP11-317P15.5	chr1:182610950-182612442	4.08363	7.56782	1.5204	1.77684	5.82573	1.64862	1.81805	0.0246897	1
ENSG00000118271.5	TTR	chr18:29171688-29178974	799.667	3.21309	0.360621	0	401.44	0.180311	11.081	0.0253965	1
ENSG00000180875.4	GREM2	chr1:240652872-240775449	13.9048	9.93926	5.43168	5.55148	11.922	5.49158	1.11763	0.0255641	1
ENSG00000198743.5	SLC5A3	chr21:35445822-35515334	23.2682	15.734	9.84125	10.4485	19.5011	10.1449	0.942463	0.0257717	1
ENSG00000132932.11	ATP8A2	chr13:25946208-26599989	5.63039	4.87098	2.71463	2.06265	5.25069	2.38864	1.13467	0.0259128	1
ENSG00000143469.12	SYT14	chr1:210111537-210337636	7.04607	3.82611	2.4165	1.82911	5.43609	2.12281	1.35453	0.0259311	1
ENSG00000155090.10	KLF10	chr8:103661006-103668130	10.7035	16.0772	23.9409	36.0343	13.3904	29.9876	-1.16287	0.0265858	1
ENSG00000108684.10	ASIC2	chr17:31340104-32484313	0.519501	0.692506	2.22782	1.66838	0.606003	1.9481	-1.67651	0.0265941	1
ENSG00000172568.4	FNDC9	chr5:156687131-157002783	0.688735	1.53435	5.49019	3.87417	1.11154	4.68218	-2.06968	0.0267997	1
ENSG00000145284.7	SCD5	chr4:83550691-83720010	67.2553	60.3009	38.7842	22.9152	63.7781	30.8497	1.04768	0.0269828	1
ENSG00000136535.10	TBR1	chr2:162272604-162282381	62.0277	2.76517	0.100938	0.105652	32.3964	0.103295	8.22495	0.02721	1
ENSG00000130147.11	SH3BP4	chr2:235860616-235964358	16.5393	16.455	36.3834	34.1589	16.4971	35.2712	-1.09604	0.0272385	1
ENSG00000101746.11	NOL4	chr18:31431063-31804725	8.34084	10.0695	4.2404	4.4331	9.20517	4.33675	1.08495	0.0274682	1
ENSG00000124587.9	PEX6	chr6:42928495-42946958	3.19982	4.87823	12.0098	7.1157	4.03903	9.56275	-1.24239	0.0280888	1
ENSG00000125968.7	ID1	chr20:30193085-30194318	73.5657	37.0638	18.9723	6.53242	55.3148	12.7524	2.11646	0.0283121	1
ENSG00000018625.10	ATP1A2	chr1:160085562-160113381	28.1132	23.7482	12.8099	12.8869	25.9307	12.8484	1.01279	0.028387	1
ENSG00000184113.8	CLDN5	chr22:19510546-19515068	4.31546	5.93116	1.39486	2.03174	5.12331	1.7133	1.5775	0.0285718	1
ENSG00000180287.11	PLD5	chr1:242251688-242687998	3.39352	3.11014	1.39265	0.335352	3.25183	0.864001	1.90604	0.0287808	1
ENSG00000254870.1	ATP6V1G2-DDX39B	chr6:31496493-31526606	1.73249	4.23084	7.88027	15.2989	2.98167	11.5896	-1.95684	0.0290184	1
ENSG00000165379.9	LRFN5	chr14:42076772-42373752	2.8223	2.96795	7.09299	8.75234	2.89513	7.92267	-1.45078	0.0295178	1
ENSG00000166265.7	CYYR1	chr21:27750870-27945603	2.50132	3.11961	6.98535	8.03854	2.81047	7.51194	-1.41677	0.0306508	1
ENSG00000165462.5	PHOX2A	chr11:71934744-71955220	0.0855944	4.08976	6.40688	10.2147	2.08768	8.31079	-1.9905	0.0308924	1
ENSG00000081189.9	MEF2C	chr5:87972035-88199922	9.5781	5.91381	5.81627	1.78632	7.74595	3.8013	1.02599	0.0309038	1
ENSG00000187210.8	GCNT1	chr9:79034751-79122332	5.59772	1.24319	0.253747	0.151501	3.42046	0.202624	4.04425	0.0309746	1
ENSG00000110092.3	CCND1	chr11:69455854-69490184	62.5004	33.164	121.188	83.4539	47.8322	102.321	-1.09697	0.0309877	1
ENSG00000180828.1	BHLHE22	chr8:65492813-65496181	4.42421	1.42201	0.267813	0.199226	2.92311	0.233519	3.61779	0.0313589	1
ENSG00000150471.10	LPHN3	chr4:62066975-62938184	29.7452	28.5181	17.407	13.4511	29.1317	15.4291	0.916718	0.0316376	1
ENSG00000267855.1	NDUFA7	chr19:8367010-8408146	138.985	59.301	168.925	320.696	99.143	244.811	-1.30404	0.0320775	1
ENSG00000163932.9	PRKCD	chr3:53190024-53226733	1.42941	1.02372	2.83078	4.38069	1.22656	3.60574	-1.5518	0.0321144	1
ENSG00000140400.9	MAN2C1	chr15:75648132-75748183	33.8264	29.1185	44.8415	69.4076	31.4725	57.1245	-0.859918	0.0322067	1
ENSG00000109906.9	ZBTB16	chr11:113930314-114227293	0.567148	2.65167	4.99092	9.9344	1.60941	7.46266	-2.20965	0.0323838	1
ENSG00000118495.13	PLAGL1	chr6:144261436-144385735	45.7138	20.4731	8.33552	8.10594	33.0934	8.22073	2.00855	0.0327899	1
ENSG00000175785.8	PRIMA1	chr14:94184643-94254827	0.575773	1.5288	2.39257	2.58289	1.05229	2.48773	-1.23736	0.0330658	1
ENSG00000136352.13	NKX2-1	chr14:36985601-36992221	10.9597	0	0	0	5.47985	0	10.0993	0.0331356	1
ENSG00000204128.5	C2orf72	chr2:231902204-231914434	1.00175	0.863555	5.4466	2.3766	0.932652	3.9116	-2.06248	0.0331819	1
ENSG00000160191.13	PDE9A	chr21:44073859-44195619	14.3998	16.249	26.1374	40.2598	15.3244	33.1986	-1.11504	0.033469	1
ENSG00000123684.8	LPGAT1	chr1:211916798-212027045	17.6612	8.93607	7.39246	5.68326	13.2986	6.53786	1.02383	0.0335739	1
ENSG00000175093.4	SPSB4	chr3:140770243-140867453	2.82364	5.78022	10.6243	11.607	4.30193	11.1156	-1.36851	0.0336068	1
ENSG00000125848.9	FLRT3	chr20:13830043-16033842	22.0196	9.68188	5.94301	4.27199	15.8507	5.1075	1.6329	0.0336533	1
ENSG00000101384.6	JAG1	chr20:10618331-10654608	10.8739	18.5421	27.478	45.899	14.708	36.6885	-1.31843	0.0336661	1
ENSG00000134057.10	CCNB1	chr5:68462836-68474072	41.1599	48.2707	75.8999	117.237	44.7153	96.5684	-1.1107	0.0339897	1
ENSG00000168394.9	TAP1	chr6:32808493-32847364	1.40442	0.395096	3.06785	2.94047	0.899758	3.00416	-1.73376	0.0343003	1
ENSG00000197381.11	ADARB1	chr21:46494492-46646478	6.64882	4.21908	2.88236	2.39297	5.43395	2.63767	1.04133	0.0345486	1
ENSG00000123496.3	IL13RA2	chrX:114238537-114253536	0.351229	0.258509	3.62419	3.27213	0.304869	3.44816	-3.47819	0.0348855	1
ENSG00000148541.8	FAM13C	chr10:60936349-61122939	11.7456	10.7912	6.1679	4.4984	11.2684	5.33315	1.07851	0.0351901	1
ENSG00000159388.5	BTG2	chr1:203274618-203278730	13.8632	18.6258	33.9458	30.9013	16.2445	32.4235	-0.996869	0.0352221	1
ENSG00000006016.6	CRLF1	chr19:18704046-18717660	2.02426	7.49569	0.827113	0.267309	4.75997	0.547211	3.10918	0.0355703	1
ENSG00000136928.4	GABBR2	chr9:101050390-101471479	4.29221	2.21482	1.48155	0.937132	3.25352	1.20934	1.42404	0.0357438	1
ENSG00000133124.10	IRS4	chrX:107963178-107979651	2.93257	0.86773	0.205591	0.0811876	1.90015	0.143389	3.68245	0.035863	1
ENSG00000101493.6	ZNF516	chr18:74069643-74207146	8.18191	10.6453	15.4497	25.3108	9.41361	20.3803	-1.11394	0.036234	1
ENSG00000010310.4	GIPR	chr19:46171501-46186982	0.98688	4.1187	6.15803	10.1377	2.55279	8.14786	-1.67241	0.0369343	1
ENSG00000164199.11	GPR98	chr5:89811427-90460038	13.5085	8.93043	7.0004	6.43849	11.2195	6.71945	0.73916	0.0369416	1
ENSG00000133636.5	NTS	chr12:86268072-86276767	15.2389	4.87452	2.54368	0.263446	10.0567	1.40356	2.83658	0.0370134	1
ENSG00000164742.10	ADCY1	chr7:45613738-45762715	8.90901	5.20743	3.51183	3.41526	7.05822	3.46354	1.026	0.0371423	1
ENSG00000204175.4	GPRIN2	chr10:46994086-47005643	2.43173	1.40827	3.38994	5.68764	1.92	4.53879	-1.23904	0.037351	1
ENSG00000254652.1	RP11-678P16.1	chr17:11144579-11467380	2.56918	0.138378	9.34329	3.8839	1.35378	6.6136	-2.28421	0.0375117	1
ENSG00000185652.6	NTF3	chr12:5541278-5604464	5.49053	1.91529	0.963217	0.126233	3.70291	0.544725	2.75382	0.038178	1
ENSG00000237411.1	AC003043.2	chr17:42396992-42402238	31.1653	18.9725	8.141	10.1835	25.0689	9.16225	1.45163	0.0383823	1
ENSG00000118263.10	KLF7	chr2:207938860-208031991	28.0357	36.8319	15.1975	14.2373	32.4338	14.7174	1.13971	0.038454	1
ENSG00000112038.12	OPRM1	chr6:154331630-154677926	0.11667	0.552725	3.8073	1.83702	0.334697	2.82216	-3.05703	0.0387063	1
ENSG00000196668.3	LINC00173	chr12:116971226-116974323	10.3929	6.72835	29.7788	81.0882	8.56062	55.4335	-2.69426	0.0391522	1
ENSG00000176809.6	LRRC37A3	chr17:62850429-62915598	9.07851	8.51679	5.40862	3.40286	8.79765	4.40574	0.996917	0.0395909	1
ENSG00000181234.8	TMEM132C	chr12:128751947-129192460	23.8912	3.15135	0.317661	0	13.5213	0.158831	6.36742	0.0395937	1
ENSG00000255378.1	AC084121.16	chr8:7636112-7638935	0.0470735	0.0408728	0.734394	5.02232	0.0439732	2.87836	-5.87961	0.0400476	1
ENSG00000025039.9	RRAGD	chr6:90074354-90121989	4.44563	7.75724	17.6527	13.6692	6.10144	15.6609	-1.35923	0.0404442	1
ENSG00000166664.8	CHRFAM7A	chr15:30653442-30686052	0.865138	1.48238	4.16512	2.83466	1.17376	3.49989	-1.5721	0.0404454	1
ENSG00000140873.11	ADAMTS18	chr16:77224731-77478233	1.80218	6.75813	1.05748	0.335425	4.28016	0.696452	2.61093	0.0406675	1
ENSG00000255251.1	RP11-1118M6.1	chr8:7397149-7399972	0.0470735	0.0408728	0.734394	5.1363	0.0439732	2.93535	-5.90785	0.0409086	1
ENSG00000154065.11	ANKRD29	chr18:21178889-21242849	7.16388	9.47112	2.5598	4.59175	8.3175	3.57578	1.21675	0.0410951	1
ENSG00000262526.2	CTD-2545G14.7	chr17:7143332-7167302	22.3363	0	33.5801	79.8346	11.1682	56.7073	-2.34363	0.0415356	1
ENSG00000129521.8	EGLN3	chr14:34393436-34692083	5.69752	2.48903	1.68429	1.01128	4.09328	1.34779	1.59908	0.0420025	1
ENSG00000186493.6	C5orf38	chr5:2745958-2755508	0.521698	4.14231	7.24921	12.9822	2.332	10.1157	-2.11458	0.0420932	1
ENSG00000165388.8	ZNF488	chr10:48355023-48373866	2.46947	1.80096	0.746422	0.720024	2.13521	0.733223	1.53563	0.0428161	1
ENSG00000140284.6	SLC27A2	chr15:50150434-50528592	1.16271	3.14261	0.170772	0.274044	2.15266	0.222408	3.24611	0.0429589	1
ENSG00000250366.2	LINC00617	chr14:96342728-96391908	3.67705	7.83935	12.2724	13.9993	5.7582	13.1358	-1.18912	0.0436018	1
ENSG00000140470.9	ADAMTS17	chr15:100510419-100882210	4.69985	0.396959	7.40105	6.23509	2.5484	6.81807	-1.418	0.0443199	1
ENSG00000211455.3	STK38L	chr12:27396900-27478892	25.3088	20.5282	14.4028	11.338	22.9185	12.8704	0.83221	0.0448393	1
ENSG00000135299.11	ANKRD6	chr6:90142888-90348472	9.63917	14.8936	33.0648	24.9426	12.2664	29.0037	-1.24119	0.0451981	1
ENSG00000007062.7	PROM1	chr4:15961865-16086001	23.7114	16.1445	14.9868	8.73658	19.928	11.8617	0.748238	0.0452691	1
ENSG00000106278.7	PTPRZ1	chr7:121513142-121702090	42.8031	61.0606	138.031	121.357	51.9318	129.694	-1.32034	0.0455473	1
ENSG00000127920.4	GNG11	chr7:93551010-93555831	22.0498	30.0389	62.7888	57.2655	26.0444	60.0272	-1.20449	0.0455827	1
ENSG00000135824.8	RGS8	chr1:182615238-182642049	8.38676	12.8962	4.36934	4.23067	10.6415	4.30001	1.30629	0.0456329	1
ENSG00000101115.8	SALL4	chr20:50400580-50419059	2.22717	2.23468	6.8287	20.0662	2.23093	13.4474	-2.58893	0.0457175	1
ENSG00000137203.6	TFAP2A	chr6:10393418-10419871	1.32752	54.314	66.5657	80.942	27.8208	73.7538	-1.4064	0.0458488	1
ENSG00000041353.5	RAB27B	chr18:52385090-52565314	1.20111	0.795683	11.0259	5.82748	0.998396	8.42669	-3.07093	0.046397	1
ENSG00000073670.9	ADAM11	chr17:42836398-42859214	1.37023	2.30601	3.1623	4.40297	1.83812	3.78263	-1.03915	0.0464665	1
ENSG00000168944.10	CEP120	chr5:122680578-122759286	10.374	11.9132	6.66848	5.83325	11.1436	6.25086	0.833581	0.0466734	1
ENSG00000102271.9	KLHL4	chrX:86772751-86925050	2.40119	1.9594	0.811817	0.648362	2.1803	0.73009	1.57184	0.0472875	1
ENSG00000147852.9	VLDLR	chr9:2621833-2654480	28.7242	18.0455	15.2384	8.43567	23.3849	11.837	0.981966	0.0483547	1
ENSG00000144724.14	PTPRG	chr3:61547584-62355005	24.813	31.4588	21.5099	11.4539	28.1359	16.4819	0.771348	0.048894	1
ENSG00000114654.6	CCDC48	chr3:128720471-128759585	0.585503	7.41619	11.5009	9.99012	4.00085	10.7455	-1.42423	0.0489958	1
ENSG00000172137.14	CALB2	chr16:71392615-71424341	20.0684	4.67665	1.33222	0.597712	12.3725	0.964966	3.67364	0.0490054	1
ENSG00000166250.7	CLMP	chr11:122943034-123098985	11.2411	6.97298	5.00669	4.19156	9.10704	4.59912	0.984847	0.0492399	1
ENSG00000128683.8	GAD1	chr2:171669722-171717661	5.5178	1.13251	7.48683	10.1915	3.32516	8.83916	-1.40914	0.0492683	1
ENSG00000138798.7	EGF	chr4:110834039-110933422	0.550374	2.39643	6.76703	22.2068	1.4734	14.4869	-3.29314	0.0502354	1
